# Supplementary material for: In vivo identification of GTPase interactors by mitochondrial relocalization and proximity biotinylation
Source: bioRxiv preprint, doi:10.1101/553206, version 2 (2019-03-19)
Supplement: Supplementary file 2 [file 553206_file03.xlsx]

## Sheet: Sheet1
T: Protein IDs	T: Majority protein IDs	C: Only identified by site	C: Reverse	C: Potential contaminant	BirA 1	BirA 2	CDC42 QL 1	CDC42 QL 2	CDC42 QL 3	CDC42 SN 1	CDC42 SN 2	CDC42 SN 3	Rac1* QL 1	Rac1* QL 2	Rac1* QL 3	Rac1* SN 1	Rac1* SN 2	Rac1* SN 3	NRas GD 1	NRas GD 2	NRas GD 3	NRas TN 2	NRas TN 1	NRas TN 3	Rab10 QL 1	Rab10 QL 2	Rab10 QL 3	Rab10 SN 1	Rab10 SN 2	Rab10 SN 3	Rab11a QL 1	Rab11a QL 2	Rab11a QL 3	Rab11a SN 1	Rab11a SN 2	Rab11a SN 3	Rab18 QL 1	Rab18 QL 2	Rab18 QL 3	Rab18 SN 1	Rab18 SN 2	Rab18 SN 3	Rab2 QL 1	Rab2 QL 2	Rab2 QL 3	Rab2 SN 1	Rab2 SN 2	Rab2 SN 3	Rab30 QL 1
CON__A2A4G1;sp|Q8N1A0|KT222_HUMAN;CON__Q8N1A0	CON__A2A4G1	+		+	0	0	0	0	0	0	0	0	0	0	0	0	0	0	0	0	0	0	0	0	0	0	0	0	0	0	0	0	0	0	0	0	0	0	0	0	0	0	0	0	0	0	0	0	0
CON__A2A5Y0	CON__A2A5Y0			+	0	0	0	0	0	0	0	0	0	0	0	0	0	0	0	0	0	0	0	0	0	0	0	0	0	0	0	0	0	0	0	0	0	0	0	0	0	0	0	0	0	0	0	0	0
sp|Q6E0U4|DMKN_HUMAN;CON__A3EZ82	sp|Q6E0U4|DMKN_HUMAN;CON__A3EZ82			+	0	0	0	0	0	0	0	0	0	0	0	0	0	0	0	0	0	0	0	0	0	0	0	0	0	0	0	0	0	0	0	0	0	0	0	0	0	0	0	0	0	0	0	0	0
CON__P01030;CON__ENSEMBL:ENSBTAP00000007350	CON__P01030;CON__ENSEMBL:ENSBTAP00000007350			+	0	0	0	0	0	0	0	0	0	22020000	17633000	0	14644000	31526000	0	0	0	0	0	0	0	0	0	0	0	0	0	0	0	0	0	0	0	0	0	0	0	0	0	9199800	0	0	13395000	0	0
CON__ENSEMBL:ENSBTAP00000024146	CON__ENSEMBL:ENSBTAP00000024146			+	0	0	0	0	0	0	0	0	0	0	0	0	0	0	0	0	0	0	0	0	0	0	0	0	0	0	0	0	0	0	0	0	0	0	0	0	0	0	0	0	0	0	0	0	0
CON__ENSEMBL:ENSBTAP00000038253	CON__ENSEMBL:ENSBTAP00000038253	+		+	0	0	0	0	0	0	0	0	0	0	0	0	0	0	0	9950900	0	0	0	0	0	0	0	0	0	0	0	0	0	0	0	0	0	0	0	0	0	0	0	0	0	0	0	0	0
sp|O43790|KRT86_HUMAN;CON__O43790	sp|O43790|KRT86_HUMAN;CON__O43790			+	0	0	0	0	0	0	0	0	0	0	4294200	0	0	0	0	0	0	0	0	0	0	0	0	0	0	354410	0	0	0	0	0	0	0	0	0	0	0	0	0	0	0	0	0	0	0
sp|O76009|KT33A_HUMAN;CON__O76009;CON__Q6NTB9	sp|O76009|KT33A_HUMAN;CON__O76009;CON__Q6NTB9			+	0	0	0	0	0	0	0	0	0	0	0	0	0	0	0	0	0	0	0	0	0	0	0	0	0	0	0	0	0	0	0	0	0	0	0	0	0	0	0	0	0	0	0	0	0
CON__O76011;sp|O76011|KRT34_HUMAN	CON__O76011;sp|O76011|KRT34_HUMAN			+	0	0	0	0	0	0	0	0	0	0	0	0	0	0	0	0	0	0	0	0	0	0	0	0	0	0	0	0	0	0	0	0	0	0	0	0	0	0	0	0	0	0	0	0	0
sp|O76013|KRT36_HUMAN;CON__O76013	sp|O76013|KRT36_HUMAN;CON__O76013			+	0	0	0	0	0	0	0	0	0	0	0	0	0	0	0	0	0	0	0	0	0	0	0	0	0	0	0	0	0	0	0	0	0	0	0	0	0	0	0	0	0	0	0	0	0
sp|O76015|KRT38_HUMAN;CON__O76015	sp|O76015|KRT38_HUMAN;CON__O76015			+	0	0	0	0	0	0	0	0	0	0	0	0	0	0	0	0	0	0	0	0	0	0	0	0	0	0	0	0	0	0	0	0	0	0	0	0	0	0	0	0	0	0	0	0	0
sp|O95678|K2C75_HUMAN;CON__O95678	sp|O95678|K2C75_HUMAN;CON__O95678			+	0	0	0	0	0	0	0	0	0	0	14527000	0	0	0	0	0	0	0	0	0	0	0	0	0	0	0	0	0	0	0	0	0	0	0	0	0	0	0	0	0	0	0	0	0	0
CON__P00711	CON__P00711			+	0	0	0	0	0	0	0	0	0	0	7836200	0	0	4917000	41924000	0	0	0	0	0	0	0	0	0	0	0	0	0	0	0	0	0	0	0	0	0	0	0	5835800	0	0	0	0	0	0
CON__P00761;sp|Q9BYE2|TMPSD_HUMAN	CON__P00761			+	11991000000	12570000000	111050000000	74167000000	21853000000	77803000000	79870000000	51224000000	79270000000	23032000000	20033000000	98537000000	35000000000	37195000000	67176000000	46051000000	56398000000	52961000000	103850000000	49578000000	139060000000	341990000000	57573000000	58348000000	447160000000	38360000000	21796000000	13996000000	29721000000	23035000000	20244000000	33342000000	63583000000	82132000000	52507000000	26838000000	62667000000	59979000000	8103500000	23486000000	30800000000	7978200000	24721000000	79470000000	11350000000
sp|P02533|K1C14_HUMAN;CON__P02533;CON__Q61782	sp|P02533|K1C14_HUMAN;CON__P02533			+	0	21975000	9751900	99288000	9411500	0	17356000	9968900	0	21454000	45598000	0	0	9435100	8608400	0	30417000	60268000	5647600	12546000	54189000	7989400	15013000	9038400	3876500	14723000	0	22742000	6958300	38255000	0	30353000	65441000	18969000	0	0	18930000	26238000	0	11921000	44447000	52919000	10825000	31615000	0
sp|P02538|K2C6A_HUMAN;CON__P02538	sp|P02538|K2C6A_HUMAN;CON__P02538			+	0	0	0	108900000	5822100	0	0	0	0	0	11993000	0	0	0	0	0	197800000	96167000	0	0	5695200	0	0	40850000	10583000	11705000	34013000	2610100	0	11577000	0	0	50971000	20659000	0	4490600	0	0	0	0	33596000	0	0	43515000	0
CON__P02662	CON__P02662			+	0	7175700	20985000	0	0	9103500	0	1383200	7359100	2118500	0	0	0	0	106910000	0	0	2515400	2206600	5860600	1471300	0	2207500	2517000	8495000	3641900	123030000	21095000	755930	7378700	40501000	5634100	0	0	0	0	9795700	0	27760000	0	30256000	20916000	12781000	19758000	0
CON__P02663	CON__P02663			+	0	14721000	0	0	0	0	0	16489000	0	10822000	17490000	0	12760000	0	896380000	0	0	0	0	27054000	0	0	0	0	0	0	28396000	0	0	0	0	0	0	0	0	0	0	0	18436000	47269000	0	21403000	267280000	20886000	0
CON__P02666	CON__P02666			+	0	0	0	0	0	0	0	0	0	0	0	0	0	0	8591600	0	0	0	6750300	0	0	0	0	0	0	0	22826000	0	0	0	0	0	0	0	0	0	0	0	0	0	7832000	0	0	0	0
CON__P02668	CON__P02668			+	3301400	0	0	0	1721200	0	0	25297000	0	8646400	13398000	0	3946700	0	348360000	0	0	0	0	7178400	0	0	0	0	0	0	346570000	0	0	0	0	0	0	0	2459800	0	0	1779700	41736000	0	0	16527000	738090000	0	0
CON__P02754	CON__P02754			+	0	0	9461100	4896400	0	38587000	0	5852600	0	14302000	12435000	0	10304000	20593000	1199500000	0	0	0	47383000	9170200	0	0	0	0	0	0	15851000	14172000	0	5462200	11696000	0	0	0	0	0	29981000	0	295800000	25817000	57658000	205700000	114190000	73240000	0
sp|P02768|ALBU_HUMAN;CON__P02768-1	sp|P02768|ALBU_HUMAN;CON__P02768-1			+	0	0	0	0	0	0	0	0	0	12176000	0	0	0	0	8542100	0	0	0	0	0	53426000	0	0	297790000	0	0	0	0	0	0	18711000	0	0	0	19811000	0	0	116830000	0	0	25895000	0	43789000	0	0
CON__P02769	CON__P02769			+	0	0	0	0	0	0	0	0	0	0	0	0	0	0	24695000	0	0	0	0	0	177130000	0	0	257090000	0	0	0	0	0	0	12738000	0	0	0	92779000	0	0	131870000	0	0	87757000	0	0	19926000	0
CON__P04259	CON__P04259			+	0	0	0	0	0	0	0	0	0	0	0	0	0	0	0	0	6695900	15735000	0	0	7897400	0	0	0	0	0	0	0	0	0	0	0	10615000	0	0	0	0	0	0	0	0	0	0	0	0
sp|P05787|K2C8_HUMAN;CON__P05787;CON__H-INV:HIT000292931;CON__Q9H552;CON__REFSEQ:XP_092267	sp|P05787|K2C8_HUMAN;CON__P05787			+	0	0	0	0	0	0	0	0	0	0	0	0	0	0	0	0	0	0	0	0	0	0	0	0	0	0	0	0	0	0	0	0	0	0	0	9673300	0	0	0	0	0	0	0	0	0
sp|P08727|K1C19_HUMAN;CON__P08727;CON__P19001	sp|P08727|K1C19_HUMAN;CON__P08727;CON__P19001			+	0	0	0	0	0	0	0	0	0	0	0	0	0	0	0	0	96245000	0	0	0	0	0	0	0	10364000	0	0	0	0	0	0	0	0	0	0	0	0	0	0	0	16747000	0	0	0	0
sp|P08729|K2C7_HUMAN;CON__Q3KNV1;CON__P08729	sp|P08729|K2C7_HUMAN;CON__Q3KNV1;CON__P08729			+	0	0	0	0	0	0	0	0	0	0	0	0	0	0	0	0	0	0	0	0	0	0	0	0	0	85307000	0	0	0	0	0	0	0	0	0	0	0	0	0	0	0	0	0	0	0
sp|P08779|K1C16_HUMAN;CON__P08779	sp|P08779|K1C16_HUMAN;CON__P08779			+	5764100	18051000	0	226180000	19707000	7637600	8907300	9980500	0	0	58139000	0	0	0	10581000	7730900	217410000	225780000	6287500	22683000	103560000	19850000	50013000	13044000	22387000	25947000	27712000	108070000	7176300	118050000	0	24004000	8811300	167460000	10784000	17715000	20717000	35904000	10300000	1908800	81190000	30892000	13760000	83861000	0
CON__P12763;sp|P02765|FETUA_HUMAN	CON__P12763			+	0	0	0	0	0	0	0	0	0	0	0	0	0	0	0	0	0	0	0	0	26149000	0	0	33367000	0	0	0	0	0	0	19128000	0	0	0	0	0	0	0	0	0	0	0	0	0	0
sp|P13645|K1C10_HUMAN;CON__P13645;sp|Q2M2I5|K1C24_HUMAN;CON__Q2M2I5;sp|Q7Z3Y9|K1C26_HUMAN;CON__Q7Z3Y9	sp|P13645|K1C10_HUMAN;CON__P13645			+	733270000	510830000	572610000	558730000	637420000	463130000	331510000	606660000	557340000	820820000	2056800000	346400000	868590000	435010000	999550000	1073000000	823760000	3332000000	2008800000	1217900000	960440000	424350000	735770000	801050000	1068100000	778410000	556580000	96299000	378100000	1510100000	0	603430000	637880000	1097000000	402240000	681070000	1101300000	1539700000	167410000	516830000	2475300000	5394200000	1316800000	861980000	694250000
CON__P13646-1	CON__P13646-1			+	0	0	0	0	0	0	0	0	0	0	0	0	0	0	0	0	834110000	0	0	0	0	0	0	0	66437000	39503000	103370000	0	0	0	0	0	0	0	0	0	0	0	17178000	0	90331000	0	0	0	0
sp|P13647|K2C5_HUMAN;CON__P13647	sp|P13647|K2C5_HUMAN;CON__P13647			+	25367000	46540000	20804000	113000000	26780000	0	18219000	27362000	21055000	88065000	138990000	0	0	34454000	12121000	34958000	149850000	187650000	64986000	48033000	223040000	34207000	26832000	90540000	23989000	111730000	37732000	28232000	25959000	93974000	0	90926000	109750000	50913000	7328100	5730000	77859000	92143000	6579400	12064000	129500000	188710000	40412000	46948000	23631000
sp|P19013|K2C4_HUMAN;CON__P19013	sp|P19013|K2C4_HUMAN;CON__P19013			+	0	0	0	958690	1899900	0	0	0	0	0	0	0	0	0	0	0	469200000	0	0	0	0	0	0	0	1937500	1475500	12656000	0	0	0	0	0	0	0	0	0	0	0	1346100	0	81039000	0	0	0	0
sp|P20930|FILA_HUMAN;CON__P20930	sp|P20930|FILA_HUMAN;CON__P20930			+	0	0	0	0	0	0	0	0	0	0	0	0	0	0	0	0	0	0	0	0	0	0	0	0	0	0	0	0	0	0	0	0	0	0	0	0	0	0	0	0	0	0	0	0	0
CON__P34955	CON__P34955			+	0	0	0	0	0	0	0	0	0	0	0	0	0	0	0	0	0	0	0	0	9010800	0	0	16058000	0	0	0	0	0	0	0	0	0	0	0	0	0	0	0	0	0	0	0	0	0
CON__P35908;CON__REFSEQ:XP_932229	CON__P35908			+	317390000	227590000	270590000	206360000	193350000	276040000	218520000	227510000	165790000	321980000	689940000	92125000	197530000	179890000	388500000	401970000	417400000	1353200000	730830000	490700000	521780000	164210000	331750000	804950000	273300000	844970000	188210000	122530000	147280000	730890000	0	375110000	361330000	281560000	115560000	236760000	549930000	562710000	77134000	162050000	649310000	1253900000	695560000	255540000	264580000
sp|P35908|K22E_HUMAN;CON__P35908v2	sp|P35908|K22E_HUMAN;CON__P35908v2			+	0	0	0	0	0	0	0	0	0	0	0	0	0	0	0	0	0	0	0	0	0	0	0	0	0	0	0	0	0	0	0	0	0	0	0	0	0	0	0	0	0	0	0	0	0
CON__P78385	CON__P78385			+	0	0	0	0	0	0	0	0	0	0	0	0	0	0	0	0	0	0	0	0	0	0	0	0	0	0	0	0	0	0	0	0	0	0	0	0	0	0	0	0	0	0	0	0	0
sp|P78386|KRT85_HUMAN;CON__P78386	sp|P78386|KRT85_HUMAN;CON__P78386			+	0	12754000	8134800	33358000	0	0	0	0	0	0	45900000	0	0	0	0	8752900	75521000	31337000	0	0	0	0	0	455250	11339000	6197000	25200000	0	4874300	0	0	14372000	39792000	0	887860	0	0	366600	0	0	2408300	19494000	0	0	17397000
CON__Q01546	CON__Q01546			+	0	0	0	0	0	0	0	0	0	0	0	0	0	0	0	0	0	0	0	0	0	0	0	0	0	0	0	0	0	0	0	0	0	0	0	0	0	0	0	0	0	0	0	0	0
sp|Q04695|K1C17_HUMAN;CON__Q04695;CON__Q99PS0	sp|Q04695|K1C17_HUMAN;CON__Q04695			+	0	0	0	14876000	0	0	0	0	0	0	0	0	0	0	0	0	0	4074300	0	0	0	0	0	0	0	0	0	5012300	0	0	0	0	71769000	0	0	0	0	0	0	0	0	0	0	3648600	0
CON__Q29443;CON__Q0IIK2	CON__Q29443;CON__Q0IIK2			+	0	0	0	0	0	0	0	0	0	0	0	0	0	0	0	0	0	0	0	0	0	0	0	0	0	0	0	0	0	0	0	0	0	0	0	0	0	0	0	0	0	0	0	0	0
sp|Q14525|KT33B_HUMAN;CON__Q14525	sp|Q14525|KT33B_HUMAN;CON__Q14525			+	0	0	0	0	0	0	0	0	0	0	0	0	0	0	0	0	0	0	0	0	0	0	0	0	0	0	0	0	0	0	0	0	0	0	0	0	0	0	0	0	0	0	0	0	0
CON__Q14532	CON__Q14532			+	0	0	0	0	0	0	0	0	0	0	0	0	0	0	0	0	0	0	0	0	0	0	0	0	0	0	0	0	0	0	0	0	0	0	0	0	0	0	0	0	0	0	0	0	0
CON__Q14533;sp|Q14533|KRT81_HUMAN	CON__Q14533;sp|Q14533|KRT81_HUMAN			+	0	0	0	0	0	0	0	0	0	0	0	0	0	0	0	0	0	0	0	0	0	0	0	0	0	0	0	0	0	0	0	0	0	0	0	0	0	0	0	0	0	0	0	0	0
sp|Q15323|K1H1_HUMAN;CON__Q9UE12;CON__Q15323	sp|Q15323|K1H1_HUMAN;CON__Q9UE12;CON__Q15323			+	0	0	8432100	0	0	0	0	0	0	0	1305500	0	0	0	0	0	0	0	0	0	0	0	0	0	0	0	0	0	0	0	0	0	0	0	1007300	0	0	0	0	0	0	0	0	0	0
sp|Q86Y46|K2C73_HUMAN;CON__Q32MB2;sp|Q7RTS7|K2C74_HUMAN;CON__Q7RTS7	sp|Q86Y46|K2C73_HUMAN;CON__Q32MB2;sp|Q7RTS7|K2C74_HUMAN;CON__Q7RTS7			+	0	0	0	0	2723500	0	0	0	0	0	0	0	0	0	3245200	0	0	0	0	0	2358200	1866500	0	2145100	6861900	0	0	0	0	0	0	0	0	0	0	0	0	0	0	0	0	27397000	0	0	0
sp|Q3LI72|KR195_HUMAN;CON__Q3LI72	sp|Q3LI72|KR195_HUMAN;CON__Q3LI72			+	0	0	0	0	0	0	0	0	0	0	0	0	0	0	0	0	0	0	0	0	0	0	0	0	0	0	0	0	0	0	0	0	0	0	0	0	0	0	0	0	0	0	0	0	0
sp|Q3SY84|K2C71_HUMAN;CON__Q3SY84	sp|Q3SY84|K2C71_HUMAN;CON__Q3SY84			+	0	0	0	0	3964000	0	0	0	0	0	0	0	0	0	0	0	0	0	0	0	0	0	0	0	0	0	0	0	0	0	0	0	0	0	0	0	0	0	0	0	0	0	0	0	0
CON__Q9Z2K1;CON__Q3ZAW8	CON__Q9Z2K1;CON__Q3ZAW8	+		+	0	0	0	0	0	0	0	0	0	0	0	0	0	0	0	0	0	0	0	0	0	0	0	0	0	0	0	0	0	0	0	0	0	0	0	0	0	0	0	0	0	0	0	0	0
CON__Q497I4	CON__Q497I4			+	0	0	0	0	0	0	0	0	0	0	0	0	0	0	0	0	0	0	0	0	0	0	0	0	0	0	0	0	0	0	0	0	0	0	0	0	0	0	0	0	0	0	0	0	0
sp|Q5D862|FILA2_HUMAN;CON__Q5D862	sp|Q5D862|FILA2_HUMAN;CON__Q5D862			+	0	0	0	0	4299400	0	0	1893500	0	0	7292100	0	0	0	0	0	3965100	3982200	4384300	4576400	4446000	2286100	6703200	927690	2512800	6300000	0	0	0	0	0	4517900	0	0	0	0	0	4930300	0	0	4566400	11251000	0	0	0
sp|Q5XKE5|K2C79_HUMAN;CON__Q5XKE5	sp|Q5XKE5|K2C79_HUMAN;CON__Q5XKE5			+	0	0	0	0	0	0	0	0	0	0	0	0	0	0	0	0	0	0	0	0	0	0	0	0	0	0	0	0	0	0	0	0	0	0	0	0	0	0	0	0	0	0	0	0	0
CON__Q5XQN5;CON__Q922U2	CON__Q5XQN5;CON__Q922U2	+		+	0	0	0	0	0	0	0	0	0	0	0	0	0	0	0	0	0	0	0	0	0	0	0	0	0	0	0	0	0	0	0	0	0	0	0	0	0	0	0	0	0	0	0	0	0
CON__Q61726	CON__Q61726			+	0	0	0	0	0	0	0	0	0	0	0	0	0	0	0	0	0	0	0	0	0	0	0	0	0	0	0	0	0	0	0	0	0	0	0	0	0	0	0	0	0	0	0	0	0
sp|Q6A162|K1C40_HUMAN;CON__Q6IFU5	sp|Q6A162|K1C40_HUMAN;CON__Q6IFU5			+	0	0	0	0	0	0	0	0	0	0	0	0	0	0	0	0	0	0	0	0	0	0	0	0	0	0	0	0	0	0	0	0	0	0	0	0	0	0	0	0	0	0	0	0	0
sp|Q6A163|K1C39_HUMAN;CON__Q6IFU6	sp|Q6A163|K1C39_HUMAN;CON__Q6IFU6			+	0	0	0	0	0	0	0	0	0	0	0	0	0	0	0	0	0	0	0	0	0	0	0	0	0	0	0	0	0	0	0	0	0	0	0	0	0	0	0	0	0	0	0	0	0
sp|Q9NSB2|KRT84_HUMAN;CON__Q9NSB2;CON__Q6ISB0	sp|Q9NSB2|KRT84_HUMAN;CON__Q9NSB2;CON__Q6ISB0			+	0	0	0	0	0	0	0	0	0	0	0	0	0	0	0	0	0	0	0	0	0	0	0	0	0	0	0	0	0	0	0	0	0	0	0	0	0	0	0	0	0	0	0	0	0
sp|Q6KB66|K2C80_HUMAN;CON__Q6KB66-1;CON__Q0VBK2	sp|Q6KB66|K2C80_HUMAN;CON__Q6KB66-1			+	0	0	0	0	0	0	0	0	0	0	0	0	0	0	0	0	0	0	0	0	0	0	0	0	0	0	0	0	0	0	0	0	0	0	0	0	0	0	0	0	0	0	0	0	0
sp|P78385|KRT83_HUMAN;CON__Q6NT21	sp|P78385|KRT83_HUMAN;CON__Q6NT21			+	0	0	0	0	0	0	0	0	0	0	0	0	0	0	0	0	0	0	0	0	0	0	0	0	0	0	0	0	0	0	0	0	0	0	0	0	0	0	0	0	0	0	0	0	0
sp|Q8N1N4|K2C78_HUMAN;CON__Q8N1N4-2;CON__Q7RTT2	sp|Q8N1N4|K2C78_HUMAN;CON__Q8N1N4-2;CON__Q7RTT2			+	0	0	0	0	0	0	0	0	0	0	0	0	0	0	0	0	0	0	0	0	0	0	0	0	0	0	0	0	0	0	0	0	0	0	0	0	0	0	0	0	938220	0	0	0	0
sp|Q7Z3Y8|K1C27_HUMAN;CON__Q7Z3Y8;sp|Q7Z3Z0|K1C25_HUMAN;CON__Q7Z3Z0	sp|Q7Z3Y8|K1C27_HUMAN;CON__Q7Z3Y8;sp|Q7Z3Z0|K1C25_HUMAN;CON__Q7Z3Z0			+	0	0	0	0	7819900	0	0	0	0	0	0	0	0	0	0	0	0	0	0	0	0	0	0	0	0	0	0	0	0	0	0	0	0	0	0	0	0	0	0	0	0	0	0	0	0
sp|Q7Z794|K2C1B_HUMAN;CON__Q7Z794	sp|Q7Z794|K2C1B_HUMAN;CON__Q7Z794			+	0	0	0	0	0	0	0	0	0	0	0	0	0	0	0	0	0	0	0	0	0	0	0	0	0	0	0	0	0	0	0	0	0	0	0	0	0	0	0	0	0	0	0	0	0
sp|Q86YZ3|HORN_HUMAN;CON__Q86YZ3	sp|Q86YZ3|HORN_HUMAN;CON__Q86YZ3			+	0	0	0	0	0	0	0	0	0	0	0	0	0	0	0	0	0	0	0	0	0	0	0	0	0	0	0	0	0	0	0	2222400	0	0	0	0	0	0	0	0	0	0	0	0	0
CON__Q8BGZ7	CON__Q8BGZ7			+	0	0	0	0	0	0	0	0	0	0	0	0	0	0	0	0	0	3454600	3292900	0	4878200	0	0	0	0	0	0	0	0	0	0	0	0	3146200	0	0	0	0	0	0	0	0	0	0	0
CON__Q8IUT8	CON__Q8IUT8			+	0	0	0	0	0	0	0	0	0	0	0	0	0	0	0	0	0	0	0	0	0	0	0	0	0	0	0	0	0	0	0	0	0	0	0	0	0	0	0	0	0	0	0	0	0
sp|Q9BYQ5|KRA46_HUMAN;CON__Q9BYQ5;sp|Q9BQ66|KR412_HUMAN;sp|Q9BYR2|KRA45_HUMAN	sp|Q9BYQ5|KRA46_HUMAN;CON__Q9BYQ5;sp|Q9BQ66|KR412_HUMAN;sp|Q9BYR2|KRA45_HUMAN			+	0	0	0	0	0	0	0	0	0	0	0	0	0	0	0	0	0	0	0	0	0	0	0	0	0	0	0	0	0	0	0	0	0	0	0	0	0	0	0	0	0	0	0	0	0
sp|Q9BYQ7|KRA41_HUMAN;CON__Q9BYQ7	sp|Q9BYQ7|KRA41_HUMAN;CON__Q9BYQ7			+	0	0	0	0	0	0	0	0	0	0	0	0	0	0	0	0	0	0	0	0	0	0	0	0	0	0	0	0	0	0	0	0	0	0	0	0	0	0	0	0	0	0	0	0	0
sp|Q9BYR4|KRA43_HUMAN;CON__Q9BYR4	sp|Q9BYR4|KRA43_HUMAN;CON__Q9BYR4			+	0	0	0	0	0	0	0	0	0	0	0	0	0	0	0	0	0	0	0	0	0	0	0	0	0	0	0	0	0	0	0	0	0	0	0	0	0	0	0	0	0	0	0	0	0
sp|Q9BYR8|KRA31_HUMAN;CON__Q9BYR8	sp|Q9BYR8|KRA31_HUMAN;CON__Q9BYR8			+	0	0	0	0	0	0	0	0	0	0	0	0	0	0	0	0	0	0	0	0	0	0	0	0	0	0	0	0	0	0	0	0	0	0	0	0	0	0	0	0	0	0	0	0	0
sp|Q9BYT5|KRA22_HUMAN;sp|Q9BYU5|KRA21_HUMAN;sp|Q9BYR9|KRA24_HUMAN;sp|P0C7H8|KRA23_HUMAN;CON__Q9BYR9	sp|Q9BYT5|KRA22_HUMAN;sp|Q9BYU5|KRA21_HUMAN;sp|Q9BYR9|KRA24_HUMAN;sp|P0C7H8|KRA23_HUMAN;CON__Q9BYR9			+	0	0	0	0	0	0	0	0	0	0	0	0	0	0	0	0	0	0	0	0	0	0	0	0	0	0	0	0	0	0	0	0	0	0	0	0	0	0	0	0	0	0	0	0	0
CON__Q9D646	CON__Q9D646	+		+	0	0	0	0	0	0	0	0	0	0	0	0	0	0	0	0	0	0	0	0	0	0	0	0	0	0	0	0	0	0	0	0	0	0	0	0	0	0	0	0	0	0	0	0	0
sp|Q9NSB4|KRT82_HUMAN;CON__Q9NSB4	sp|Q9NSB4|KRT82_HUMAN;CON__Q9NSB4			+	0	0	0	0	0	0	0	0	0	0	0	0	0	0	0	0	0	0	0	0	0	0	0	0	0	0	0	0	0	0	0	0	0	0	0	0	0	0	0	0	0	0	0	0	0
sp|P19823|ITIH2_HUMAN;CON__Q9TRI1	sp|P19823|ITIH2_HUMAN;CON__Q9TRI1	+		+	0	0	0	0	0	0	0	0	0	0	0	0	0	0	0	0	0	0	0	0	0	0	0	0	0	0	0	0	0	0	0	0	0	0	0	0	0	0	0	0	0	0	0	0	0
CON__REFSEQ:XP_001474382	CON__REFSEQ:XP_001474382			+	0	0	0	0	0	0	0	0	0	0	0	0	0	0	0	0	0	0	0	0	0	0	0	0	0	0	0	0	0	0	0	0	0	0	0	0	0	0	0	0	0	0	0	0	0
CON__REFSEQ:XP_986630	CON__REFSEQ:XP_986630			+	0	0	0	0	0	0	0	0	0	0	2576000	0	0	0	0	0	0	0	0	0	0	0	0	0	0	0	0	0	0	0	0	0	0	0	0	0	0	0	0	0	0	0	0	0	0
CON__Streptavidin	CON__Streptavidin			+	2459400000	716380000	4814200000	3116800000	5053600000	3329800000	4236700000	3640600000	1041000000	1059100000	573220000	4161200000	1540600000	253860000	2985200000	4814800000	2217900000	5226000000	1729900000	1173200000	3966000000	5025200000	2282900000	5596600000	6393000000	8367200000	5059500000	6862000000	4367500000	5922300000	5683300000	2929700000	9110800000	9020900000	18170000000	4880500000	8569800000	2594900000	4214500000	3880700000	3910500000	2647000000	2694800000	3335200000	4200800000
REV__sp|A6NK89|RASFA_HUMAN	REV__sp|A6NK89|RASFA_HUMAN	+	+		0	0	0	0	0	0	0	0	0	0	0	0	0	0	0	0	0	0	0	0	0	0	0	0	0	0	0	0	0	0	0	0	0	0	0	0	0	0	0	0	0	0	0	0	0
REV__sp|A6QL64|AN36A_HUMAN;REV__sp|Q8N2N9|AN36B_HUMAN	REV__sp|A6QL64|AN36A_HUMAN;REV__sp|Q8N2N9|AN36B_HUMAN		+		7810300	0	0	4391400	0	0	0	0	0	0	0	0	0	0	0	0	0	0	0	0	0	0	0	0	0	0	0	0	0	0	0	0	0	0	0	0	0	0	0	0	0	0	0	0	0
REV__sp|D6RGH6|MCIN_HUMAN	REV__sp|D6RGH6|MCIN_HUMAN		+		0	0	0	0	0	0	0	0	0	0	0	0	6606300	0	0	0	0	0	0	0	0	0	0	0	0	0	0	0	0	0	0	0	0	0	0	0	0	0	0	0	0	0	0	0	0
REV__sp|O15519|CFLAR_HUMAN	REV__sp|O15519|CFLAR_HUMAN	+	+		0	0	0	0	0	0	0	0	0	0	0	0	0	0	0	0	0	0	0	0	0	0	0	0	0	0	0	869320	0	0	0	0	0	0	0	0	0	0	0	0	0	0	0	0	0
REV__sp|O60437|PEPL_HUMAN	REV__sp|O60437|PEPL_HUMAN		+		0	0	0	0	0	0	0	0	0	0	0	0	0	0	0	0	0	3613700	0	0	0	0	0	0	0	0	0	0	0	0	0	0	0	0	0	6498800	8356600	0	0	0	0	0	0	0	0
REV__sp|Q5VTA0|PRA17_HUMAN;REV__sp|O60809|PRA10_HUMAN	REV__sp|Q5VTA0|PRA17_HUMAN;REV__sp|O60809|PRA10_HUMAN	+	+		0	0	0	0	0	0	0	0	0	0	0	0	0	0	0	0	0	0	0	0	0	0	0	0	0	0	0	0	0	0	0	0	0	0	0	0	0	0	0	0	0	0	0	0	0
REV__sp|O75911|DHRS3_HUMAN	REV__sp|O75911|DHRS3_HUMAN		+		0	0	0	0	0	0	0	0	0	0	0	0	0	0	0	0	0	0	0	0	0	0	0	0	0	0	0	0	0	0	0	0	0	0	0	0	0	0	0	0	0	0	0	0	0
REV__sp|P0CG41|CTGE8_HUMAN;REV__sp|Q8IX94|CTGE4_HUMAN;REV__sp|A4FU28|CTGE9_HUMAN;REV__sp|A4D2H0|CTGEF_HUMAN;REV__sp|Q86UF2|CTGE6_HUMAN;REV__sp|O15320|CTGE5_HUMAN;REV__sp|Q8IX95|CTGE3_HUMAN	REV__sp|P0CG41|CTGE8_HUMAN;REV__sp|Q8IX94|CTGE4_HUMAN;REV__sp|A4FU28|CTGE9_HUMAN;REV__sp|A4D2H0|CTGEF_HUMAN;REV__sp|Q86UF2|CTGE6_HUMAN;REV__sp|O15320|CTGE5_HUMAN		+		39632000	33070000	18821000	40724000	66066000	0	5138000	36216000	0	0	43336000	44509000	75704000	71027000	0	0	17099000	0	0	0	0	57331000	0	29148000	17799000	0	111040000	98385000	27499000	83585000	146050000	30379000	25069000	23806000	0	32300000	0	60778000	24308000	39983000	24953000	35733000	53954000	25123000	0
REV__sp|P16278|BGAL_HUMAN	REV__sp|P16278|BGAL_HUMAN		+		0	0	0	0	0	0	0	0	0	0	0	0	0	0	0	0	0	0	0	0	0	0	0	0	0	0	0	0	0	0	0	0	0	0	0	0	0	0	0	0	0	0	0	0	0
REV__sp|P28476|GBRR2_HUMAN	REV__sp|P28476|GBRR2_HUMAN	+	+		0	0	0	0	0	0	0	0	0	0	0	0	0	0	0	0	0	0	0	0	0	0	0	0	0	0	0	0	0	0	0	0	0	0	0	0	0	0	0	0	0	0	0	0	0
REV__sp|P29144|TPP2_HUMAN	REV__sp|P29144|TPP2_HUMAN	+	+		0	0	0	0	0	0	0	0	0	0	0	0	0	0	0	0	0	0	0	0	0	0	0	0	0	0	0	0	0	0	0	0	0	0	0	0	0	0	0	0	0	0	0	0	0
REV__sp|P32455|GBP1_HUMAN	REV__sp|P32455|GBP1_HUMAN	+	+		0	0	0	0	0	0	0	0	0	0	0	0	0	0	0	0	0	0	0	0	0	0	0	0	0	0	0	0	0	0	0	0	0	0	0	0	0	0	0	0	0	0	0	0	0
REV__sp|P33241|LSP1_HUMAN	REV__sp|P33241|LSP1_HUMAN		+		0	0	0	0	0	0	0	0	0	0	0	0	0	0	0	0	0	0	0	0	0	0	0	0	0	0	0	0	0	0	0	0	0	0	0	0	0	0	0	0	0	0	0	0	0
REV__sp|P35580|MYH10_HUMAN	REV__sp|P35580|MYH10_HUMAN		+		0	0	0	0	0	0	0	0	21720000	14965000	0	0	0	0	0	0	0	0	0	0	0	0	0	0	0	0	0	0	0	0	0	0	0	0	0	0	0	0	0	0	0	0	0	0	0
REV__sp|P36897|TGFR1_HUMAN	REV__sp|P36897|TGFR1_HUMAN	+	+		0	0	0	0	0	0	0	0	0	0	0	0	0	0	0	0	0	0	0	0	0	0	0	0	0	0	0	0	0	0	0	0	0	0	0	0	0	0	0	0	0	0	0	0	0
REV__sp|P40939|ECHA_HUMAN	REV__sp|P40939|ECHA_HUMAN		+		0	0	0	0	0	0	630680000	0	0	0	0	0	0	0	0	1957400000	0	0	0	2529300000	0	2472800000	0	0	0	0	0	6033200000	0	0	0	0	0	0	0	0	0	0	0	0	0	0	0	0	0
REV__sp|P57059|SIK1_HUMAN	REV__sp|P57059|SIK1_HUMAN	+	+		0	0	0	0	0	0	0	0	0	0	0	0	0	0	0	0	0	0	0	0	0	0	0	0	0	0	0	0	0	0	0	0	0	0	0	0	0	0	0	0	0	0	0	0	0
REV__sp|P61966|AP1S1_HUMAN	REV__sp|P61966|AP1S1_HUMAN		+		0	0	25058000	0	58410000	8179300	11374000	26799000	0	22539000	0	0	27021000	0	18756000	14405000	7544000	23693000	34500000	20591000	11221000	140610000	5311700	13738000	346990000	5930900	18468000	0	20493000	38606000	0	19980000	37373000	29168000	114280000	0	62774000	113110000	20088000	61459000	62026000	31819000	72594000	48449000	0
REV__sp|Q01850|CDR2_HUMAN	REV__sp|Q01850|CDR2_HUMAN	+	+		0	0	0	0	0	0	0	0	0	0	0	0	0	0	0	0	0	0	0	0	0	0	0	0	0	53493000	0	22093000	0	0	22162000	0	0	0	0	0	0	0	0	0	0	0	0	0	11109000
REV__sp|Q04446|GLGB_HUMAN	REV__sp|Q04446|GLGB_HUMAN	+	+		0	0	0	0	12828000	0	0	0	0	0	0	0	0	0	0	0	0	0	0	0	0	12077000	0	0	0	0	0	0	0	0	0	0	0	0	0	0	0	0	0	23574000	0	0	0	0	0
REV__sp|Q13155|AIMP2_HUMAN	REV__sp|Q13155|AIMP2_HUMAN	+	+		0	0	0	0	0	0	0	0	0	0	0	0	0	0	0	0	0	0	0	0	0	0	0	0	0	0	0	0	0	0	0	0	0	0	0	0	0	0	0	0	0	0	0	0	0
REV__sp|Q13702|RAPSN_HUMAN	REV__sp|Q13702|RAPSN_HUMAN	+	+		0	0	0	0	0	0	0	0	0	0	0	0	0	0	0	0	0	0	0	0	0	0	0	0	0	0	0	0	0	0	0	0	0	0	0	0	0	0	0	0	0	0	0	0	0
REV__sp|Q14320|FA50A_HUMAN	REV__sp|Q14320|FA50A_HUMAN	+	+		0	0	0	0	0	0	0	0	0	0	0	0	0	0	0	0	0	0	0	0	0	0	0	0	0	0	0	0	0	0	0	0	0	0	0	0	0	0	0	0	0	0	0	0	0
REV__sp|Q15046|SYK_HUMAN	REV__sp|Q15046|SYK_HUMAN		+		0	0	0	0	0	4254200	0	0	0	0	0	0	0	0	0	0	0	0	0	0	0	0	0	0	0	9340800	0	0	0	0	0	0	0	0	0	0	0	0	0	0	0	0	0	0	0
REV__sp|Q16281|CNGA3_HUMAN	REV__sp|Q16281|CNGA3_HUMAN	+	+		0	0	0	0	0	0	0	0	0	0	0	0	0	0	0	0	0	0	0	0	0	0	0	0	0	0	0	0	0	0	0	0	0	0	0	0	0	0	0	0	0	0	0	2842900	0
REV__sp|Q2M243|CCD27_HUMAN	REV__sp|Q2M243|CCD27_HUMAN		+		0	0	0	0	0	0	0	0	0	0	0	0	0	0	0	0	0	0	0	0	0	0	0	0	0	0	0	0	0	0	0	0	0	0	0	45601000	17565000	0	0	0	0	0	0	0	0
REV__sp|Q2NKX8|ERC6L_HUMAN	REV__sp|Q2NKX8|ERC6L_HUMAN		+		0	0	0	3373400	0	4174300	3934300	565490	3838300	0	0	6779700	0	0	1063400	0	2179900	0	646830	0	13734	0	321450	33504	0	0	7939500	1547900	4910200	6117100	4637000	4183500	0	0	0	0	0	0	0	0	6538700	0	0	0	0
REV__sp|Q502W6|VWA3B_HUMAN	REV__sp|Q502W6|VWA3B_HUMAN		+		0	0	0	0	0	0	0	0	0	0	0	0	0	0	0	0	0	0	0	0	0	0	0	0	0	0	0	0	0	0	0	0	0	0	0	0	0	0	0	0	0	0	0	0	0
REV__sp|Q5M775|CYTSB_HUMAN	REV__sp|Q5M775|CYTSB_HUMAN		+		0	0	0	4763200	0	6880100	0	0	0	0	0	0	0	0	0	0	0	0	3803900	3348900	0	33558000	0	0	47848000	0	0	0	1425000	0	0	0	0	0	0	0	0	0	0	0	0	0	2749900	0	0
REV__sp|Q5T0N5|FBP1L_HUMAN	REV__sp|Q5T0N5|FBP1L_HUMAN	+	+		0	0	0	0	0	0	0	0	0	0	0	0	0	0	0	0	0	0	0	0	0	0	0	0	0	0	0	0	0	0	0	0	0	0	8483900	0	0	0	0	0	0	0	0	0	0
REV__sp|Q6TFL4|KLH24_HUMAN	REV__sp|Q6TFL4|KLH24_HUMAN	+	+		0	0	0	0	0	0	0	0	0	0	0	0	0	0	0	0	0	0	0	0	0	0	0	0	0	0	0	0	0	0	0	0	0	0	0	0	0	0	0	0	0	0	0	0	0
REV__sp|Q70CQ2|UBP34_HUMAN	REV__sp|Q70CQ2|UBP34_HUMAN	+	+		0	0	0	0	0	0	0	0	0	0	0	0	0	0	0	0	0	0	0	0	0	0	0	0	0	0	0	0	0	0	0	0	0	0	0	0	0	0	0	0	0	0	0	0	0
REV__sp|Q8IYA8|IHO1_HUMAN	REV__sp|Q8IYA8|IHO1_HUMAN	+	+		0	0	0	0	0	0	0	0	0	0	0	0	0	0	0	0	0	0	0	0	0	0	0	0	0	0	0	0	0	0	0	0	0	0	0	0	0	0	0	0	0	0	0	0	0
REV__sp|Q8IZQ1|WDFY3_HUMAN	REV__sp|Q8IZQ1|WDFY3_HUMAN	+	+		0	0	0	0	0	0	0	0	0	0	0	0	0	0	0	0	0	0	0	0	0	0	0	0	0	0	0	0	0	0	0	0	0	0	0	0	0	0	0	0	0	0	0	0	0
REV__sp|Q8N336|ELMD1_HUMAN	REV__sp|Q8N336|ELMD1_HUMAN	+	+		0	0	0	0	0	0	0	0	0	0	0	0	0	0	0	0	0	0	0	0	0	0	0	0	0	0	0	0	0	0	0	0	0	0	0	0	0	0	0	0	0	0	0	0	0
REV__sp|Q8N4V2|SVOP_HUMAN	REV__sp|Q8N4V2|SVOP_HUMAN	+	+		0	0	0	0	0	0	0	0	0	0	0	0	0	0	0	0	0	0	0	0	0	0	0	0	0	0	0	0	0	0	0	0	0	0	0	0	0	0	0	0	0	0	0	0	0
REV__sp|Q8N5R6|CCD33_HUMAN	REV__sp|Q8N5R6|CCD33_HUMAN	+	+		0	0	0	0	0	0	0	0	0	0	0	0	0	0	0	0	0	0	0	0	0	0	0	0	0	0	0	0	0	0	0	0	0	0	0	0	0	0	0	0	0	0	0	0	0
REV__sp|Q8NDI1|EHBP1_HUMAN	REV__sp|Q8NDI1|EHBP1_HUMAN		+		0	0	0	0	3209100	0	0	0	0	0	0	0	0	0	0	0	0	0	0	0	0	0	0	0	0	0	0	0	0	0	0	0	0	0	0	0	0	0	0	0	0	0	0	0	0
REV__sp|Q96CX3|ZN501_HUMAN;REV__sp|Q8TBZ5|ZN502_HUMAN	REV__sp|Q96CX3|ZN501_HUMAN;REV__sp|Q8TBZ5|ZN502_HUMAN		+		0	0	0	0	0	0	0	0	0	0	0	0	0	0	0	0	0	0	0	13526000	0	227160000	0	0	614850000	0	0	0	0	0	0	0	0	0	0	0	0	0	0	0	8028500	0	0	68902000	0
REV__sp|Q8TCG5|CPT1C_HUMAN	REV__sp|Q8TCG5|CPT1C_HUMAN	+	+		0	0	0	0	0	0	0	0	0	0	0	0	0	0	0	0	0	0	0	0	0	0	0	0	0	0	0	0	0	0	0	0	0	0	0	0	0	0	0	0	0	0	0	0	0
REV__sp|Q8WUQ7|CATIN_HUMAN	REV__sp|Q8WUQ7|CATIN_HUMAN	+	+		0	0	0	0	0	0	0	0	0	0	0	0	0	0	0	0	0	0	0	4596900	0	0	0	0	0	0	0	0	0	0	0	0	0	0	0	0	0	0	0	0	0	0	0	0	0
REV__sp|Q92616|GCN1_HUMAN	REV__sp|Q92616|GCN1_HUMAN	+	+		0	0	0	0	0	0	0	0	0	0	0	0	0	0	0	0	0	0	0	0	0	0	0	0	6329600	0	0	0	0	0	0	0	0	0	0	0	0	0	0	0	0	0	0	0	0
REV__sp|Q92954|PRG4_HUMAN	REV__sp|Q92954|PRG4_HUMAN	+	+		0	0	0	0	0	0	0	0	0	0	0	0	0	0	0	0	0	0	0	0	0	0	0	0	0	0	0	0	0	0	0	0	0	0	0	0	0	0	0	0	0	0	0	0	0
REV__sp|Q96DA0|ZG16B_HUMAN	REV__sp|Q96DA0|ZG16B_HUMAN	+	+		0	0	0	0	0	0	0	0	0	0	0	0	0	0	0	0	0	0	0	0	0	0	0	0	0	0	0	0	0	0	0	0	0	0	0	0	0	0	0	0	0	0	0	0	0
REV__sp|Q96LM9|CT173_HUMAN	REV__sp|Q96LM9|CT173_HUMAN	+	+		0	0	0	0	0	0	0	0	0	0	0	0	0	0	0	0	0	0	0	0	0	0	0	8697600	0	0	0	0	0	0	0	0	0	0	0	0	0	0	0	0	0	0	0	0	0
REV__sp|Q99759|M3K3_HUMAN	REV__sp|Q99759|M3K3_HUMAN		+		0	0	0	0	0	0	0	0	0	0	0	0	0	0	0	0	0	0	0	0	0	0	0	0	0	0	0	0	0	0	0	0	0	0	0	0	0	0	0	0	0	0	0	3261700	0
REV__sp|Q9BQI6|SLF1_HUMAN	REV__sp|Q9BQI6|SLF1_HUMAN		+		0	0	6182800	87517000	0	0	0	0	0	170840000	0	0	5987000	40185000	0	0	0	0	0	0	5976400	0	2298000	53240000	0	0	0	0	0	0	16542000	4356700	0	0	0	0	49724000	0	0	0	5489400	0	0	2714000	0
REV__sp|Q9BR11|ZSWM1_HUMAN	REV__sp|Q9BR11|ZSWM1_HUMAN		+		1905400000	1808300000	1293100000	98410000	1927800000	308430000	1214300000	647400000	1344600000	2653600000	401400000	3254200000	1452700000	1952000000	762540000	820450000	1903300000	2830700000	793320000	1422000000	3257200000	936940000	3676500000	1278300000	1097500000	2014700000	2379000000	3623600000	2370400000	2362100000	640820000	78258000	1832800000	2082400000	111490000	26120000	0	524210000	1437500000	0	537910000	1445600000	37641000	722090000	5944300000
REV__sp|Q9BSR8|YIPF4_HUMAN	REV__sp|Q9BSR8|YIPF4_HUMAN	+	+		0	0	0	0	0	0	0	0	0	0	0	0	0	0	0	0	0	0	0	0	0	0	0	0	0	0	0	0	0	0	0	0	0	0	0	0	0	0	0	0	0	0	0	0	0
REV__sp|Q9BUQ8|DDX23_HUMAN	REV__sp|Q9BUQ8|DDX23_HUMAN	+	+		0	0	0	0	0	0	0	0	0	0	0	0	0	0	0	0	0	0	0	0	0	0	0	0	0	0	0	0	0	0	0	0	0	0	0	0	0	0	0	0	7813800	0	0	10368000	0
REV__sp|Q9BXC9|BBS2_HUMAN	REV__sp|Q9BXC9|BBS2_HUMAN	+	+		0	0	0	0	0	0	0	0	0	0	0	0	0	0	0	0	0	0	0	0	0	0	0	0	0	0	0	0	0	0	0	4737100	0	0	0	0	0	0	0	0	0	0	0	0	0
REV__sp|Q9BYT3|STK33_HUMAN	REV__sp|Q9BYT3|STK33_HUMAN		+		0	0	0	0	0	0	0	0	0	0	0	0	0	0	0	0	0	0	0	0	0	0	0	0	0	0	0	0	3787100	0	0	0	0	0	0	0	0	0	0	0	0	0	0	0	0
REV__sp|Q9C093|SPEF2_HUMAN	REV__sp|Q9C093|SPEF2_HUMAN		+		0	0	0	0	6424200	2107700	0	0	0	0	0	0	0	0	0	0	0	0	0	0	0	0	0	0	6136500	0	0	0	0	0	0	0	0	0	0	0	0	0	0	0	0	0	0	0	0
REV__sp|Q9HD67|MYO10_HUMAN	REV__sp|Q9HD67|MYO10_HUMAN	+	+		0	0	0	0	0	0	0	0	0	0	0	0	0	0	0	0	0	0	0	0	0	0	0	0	0	0	0	0	0	0	0	0	0	28200000	0	0	0	0	0	0	0	0	0	0	0
REV__sp|Q9NQT8|KI13B_HUMAN	REV__sp|Q9NQT8|KI13B_HUMAN		+		0	0	0	0	0	0	0	0	0	0	0	0	0	0	0	0	0	0	0	0	8607000	7887400	18667000	0	0	0	0	0	0	0	0	0	0	0	0	0	0	0	0	0	0	0	0	0	0
REV__sp|Q9NQX4|MYO5C_HUMAN	REV__sp|Q9NQX4|MYO5C_HUMAN	+	+		0	0	0	0	0	0	0	0	0	0	0	0	0	0	0	0	0	0	0	0	0	0	0	0	0	0	0	0	0	0	0	0	0	0	0	0	0	0	0	0	0	0	0	0	0
REV__sp|Q9NTN9|SEM4G_HUMAN	REV__sp|Q9NTN9|SEM4G_HUMAN		+		0	0	0	0	0	0	0	0	0	0	0	0	0	0	0	0	0	0	0	0	0	0	0	0	0	0	0	0	0	0	0	0	0	0	29166000	0	0	0	0	0	0	0	0	0	0
REV__sp|Q9NZ08|ERAP1_HUMAN	REV__sp|Q9NZ08|ERAP1_HUMAN	+	+		0	0	0	0	0	0	0	0	0	0	0	0	0	0	0	0	0	0	0	0	0	0	0	0	0	0	0	0	0	0	0	0	0	0	0	0	0	0	0	0	0	0	0	0	0
REV__sp|Q9NZN5|ARHGC_HUMAN	REV__sp|Q9NZN5|ARHGC_HUMAN		+		0	0	0	0	0	0	0	0	0	0	0	0	0	0	0	0	0	0	0	0	0	3663100	0	0	0	0	0	0	0	0	0	0	0	0	0	0	0	0	0	0	0	0	0	0	0
REV__sp|Q9P2B4|CT2NL_HUMAN	REV__sp|Q9P2B4|CT2NL_HUMAN	+	+		0	0	0	0	0	0	0	0	0	0	0	0	0	0	0	0	0	0	0	0	0	0	0	0	0	0	0	0	0	0	0	0	0	0	0	0	0	0	0	0	0	0	0	0	0
REV__sp|Q9P2J3|KLHL9_HUMAN	REV__sp|Q9P2J3|KLHL9_HUMAN	+	+		0	0	0	0	0	0	0	0	0	0	0	0	0	0	0	0	0	0	0	0	0	0	0	0	0	0	0	0	0	0	0	0	0	0	0	0	0	0	0	0	0	0	0	0	0
REV__sp|Q9UDR5|AASS_HUMAN	REV__sp|Q9UDR5|AASS_HUMAN		+		0	0	0	0	0	0	0	0	0	0	0	0	0	0	0	0	0	0	0	0	0	0	0	0	0	0	0	0	0	0	0	5001700	0	0	962470	0	0	0	0	0	0	0	0	0	0
REV__sp|Q9UKK3|PARP4_HUMAN	REV__sp|Q9UKK3|PARP4_HUMAN	+	+		0	0	0	0	37160000	0	0	0	0	49583000	0	0	0	0	38820000	0	0	0	0	0	0	66988000	0	0	0	0	0	0	0	0	0	0	0	0	0	0	0	0	0	0	105810000	33761000	0	0	0
REV__sp|Q9Y623|MYH4_HUMAN;REV__sp|Q9UKX2|MYH2_HUMAN;REV__sp|P13535|MYH8_HUMAN;REV__sp|P12882|MYH1_HUMAN	REV__sp|Q9Y623|MYH4_HUMAN;REV__sp|Q9UKX2|MYH2_HUMAN;REV__sp|P13535|MYH8_HUMAN;REV__sp|P12882|MYH1_HUMAN		+		0	0	0	0	0	0	0	0	0	0	0	0	0	0	0	0	0	0	0	0	0	0	0	0	17813000	0	0	0	0	0	0	0	0	0	0	0	0	0	0	0	0	0	0	0	0
REV__sp|Q9ULJ1|ODF2L_HUMAN	REV__sp|Q9ULJ1|ODF2L_HUMAN		+		0	0	0	0	0	0	0	0	0	0	0	0	0	0	0	0	0	0	0	0	0	0	0	0	0	0	0	0	0	0	0	0	0	0	0	0	0	0	0	0	0	0	0	0	0
REV__sp|Q9ULK0|GRID1_HUMAN	REV__sp|Q9ULK0|GRID1_HUMAN		+		0	0	9376200	6587300	0	10314000	114770000	17436000	0	0	0	0	0	0	0	0	0	0	0	0	0	0	0	0	0	0	0	0	0	0	0	0	0	0	0	0	0	0	0	0	0	0	0	0	0
REV__sp|Q9Y490|TLN1_HUMAN	REV__sp|Q9Y490|TLN1_HUMAN		+		0	0	0	0	0	0	0	0	0	0	0	0	0	0	0	0	0	0	0	0	0	0	21478000	0	0	0	0	0	13176000	0	0	0	0	0	0	0	0	0	0	0	0	0	0	0	0
REV__sp|Q9Y5B0|CTDP1_HUMAN	REV__sp|Q9Y5B0|CTDP1_HUMAN	+	+		0	0	0	0	0	0	0	0	0	0	0	0	0	0	0	0	0	0	0	0	0	0	0	0	0	0	0	0	0	0	0	0	0	0	0	0	0	0	0	0	0	0	0	0	0
REV__sp|Q9Y5S2|MRCKB_HUMAN	REV__sp|Q9Y5S2|MRCKB_HUMAN	+	+		0	0	0	0	0	0	0	0	0	0	0	0	0	0	0	0	0	0	0	0	0	0	0	0	14014000	0	0	0	0	0	0	0	0	0	0	0	0	0	0	0	0	0	0	0	0
REV__sp|Q9Y5T5|UBP16_HUMAN	REV__sp|Q9Y5T5|UBP16_HUMAN		+		0	0	0	0	0	0	0	0	0	0	0	0	0	0	0	0	0	0	0	0	0	0	0	0	0	0	0	0	0	0	0	0	0	0	0	0	0	0	0	0	0	0	0	0	0
REV__sp|Q9Y6C5|PTC2_HUMAN	REV__sp|Q9Y6C5|PTC2_HUMAN	+	+		0	0	0	0	0	0	0	0	0	0	0	0	0	0	0	0	0	0	0	0	0	0	0	0	0	0	0	0	0	0	0	0	0	0	0	0	0	0	0	0	0	0	0	0	0
sp|P06310|KV230_HUMAN;sp|P01615|KVD28_HUMAN;sp|A2NJV5|KV229_HUMAN;sp|A0A0A0MRZ7|KVD26_HUMAN;sp|A0A075B6S6|KVD30_HUMAN;sp|A0A075B6S2|KVD29_HUMAN;sp|A0A075B6P5|KV228_HUMAN;sp|P01614|KVD40_HUMAN;sp|A0A087WW87|KV240_HUMAN	sp|P06310|KV230_HUMAN;sp|P01615|KVD28_HUMAN;sp|A2NJV5|KV229_HUMAN;sp|A0A0A0MRZ7|KVD26_HUMAN;sp|A0A075B6S6|KVD30_HUMAN;sp|A0A075B6S2|KVD29_HUMAN;sp|A0A075B6P5|KV228_HUMAN;sp|P01614|KVD40_HUMAN;sp|A0A087WW87|KV240_HUMAN				0	0	0	0	0	0	0	0	0	0	0	0	0	0	0	0	0	0	0	0	1470800	0	0	0	0	0	0	0	0	0	0	0	0	0	0	0	0	0	0	0	0	0	0	0	0
sp|A0AVT1|UBA6_HUMAN	sp|A0AVT1|UBA6_HUMAN				0	0	0	0	0	0	0	0	0	0	0	0	0	0	0	0	0	0	0	0	0	0	0	0	0	0	0	0	0	0	0	0	0	0	0	0	0	0	0	0	0	0	0	0	0
sp|A0FGR8|ESYT2_HUMAN	sp|A0FGR8|ESYT2_HUMAN				37122000	0	25036000	55732000	19380000	8912700	18232000	30699000	0	19547000	0	6196500	21483000	33838000	17840000	62947000	27726000	40519000	0	26302000	37305000	22615000	16032000	43216000	0	30738000	11532000	0	79970000	0	0	29563000	27178000	8543600	16950000	39098000	41110000	0	2106500	6374300	2825500	19398000	4137300	28648000	32444000
sp|A0JNW5|UH1BL_HUMAN;sp|Q32M92|CO032_HUMAN	sp|A0JNW5|UH1BL_HUMAN				0	0	0	0	0	0	0	0	0	0	0	0	0	0	0	0	0	0	0	0	38242000	3647900	39261000	0	0	0	379390000	399200000	616130000	0	0	2548700	0	0	0	0	0	0	0	0	0	0	0	0	0
sp|A0MZ66|SHOT1_HUMAN	sp|A0MZ66|SHOT1_HUMAN				0	0	0	0	1865100	0	0	0	0	0	0	0	0	0	0	0	0	0	0	0	0	0	0	0	0	0	0	0	0	0	0	0	0	0	0	0	0	0	0	0	0	0	0	0	0
sp|A1A4S6|RHG10_HUMAN	sp|A1A4S6|RHG10_HUMAN				0	0	0	4432600	0	0	0	0	0	4257300	0	0	0	0	0	0	0	0	0	0	0	0	0	0	0	0	0	0	0	0	0	0	0	0	0	0	0	0	0	0	0	0	0	0	0
sp|A1L0T0|ILVBL_HUMAN	sp|A1L0T0|ILVBL_HUMAN				0	0	0	0	0	0	0	793240	0	0	0	0	0	0	667780	0	0	0	882280	0	0	0	842300	0	0	0	0	0	0	0	0	0	2487000	0	0	0	0	0	2214500	0	0	0	0	0	0
sp|A1X283|SPD2B_HUMAN	sp|A1X283|SPD2B_HUMAN				0	0	5925800	2581000	0	9281300	5974400	5370800	0	0	0	0	0	0	0	0	0	0	13935000	7000600	0	3192400	0	0	0	0	0	0	5158600	10315000	0	15346000	0	0	0	0	0	0	0	0	28738000	0	0	5739900	0
sp|A2RRP1|NBAS_HUMAN	sp|A2RRP1|NBAS_HUMAN				0	0	0	0	0	0	0	0	0	0	0	0	0	0	0	0	0	0	0	0	0	0	0	0	0	0	0	0	0	0	0	0	614530000	379690000	365230000	0	0	0	0	0	0	0	0	0	0
sp|A2RU67|F234B_HUMAN	sp|A2RU67|F234B_HUMAN				0	0	0	0	0	0	0	0	0	0	0	0	0	0	0	0	0	0	0	0	0	0	0	0	0	0	0	0	0	0	0	0	0	0	0	0	0	0	0	0	0	0	0	0	0
sp|A2VDJ0|T131L_HUMAN	sp|A2VDJ0|T131L_HUMAN				0	0	0	0	0	0	0	0	0	0	0	0	0	0	0	0	0	0	0	774970	0	0	0	0	0	0	0	0	0	0	0	1477300	0	0	0	0	0	0	0	0	0	0	0	0	0
sp|A3KMH1|VWA8_HUMAN	sp|A3KMH1|VWA8_HUMAN				0	0	0	0	0	0	0	0	0	0	0	0	0	0	0	0	0	0	0	0	1712900	0	6736700	19036000	102260000	49580000	0	0	0	0	0	0	0	0	3988000	0	0	0	0	0	0	0	0	4029700	0
sp|A3KN83|SBNO1_HUMAN;sp|Q9Y2G9|SBNO2_HUMAN	sp|A3KN83|SBNO1_HUMAN				0	0	0	0	0	0	3443300	0	0	0	0	0	0	0	0	0	0	0	0	0	0	0	0	0	0	0	0	0	0	0	0	0	0	0	0	0	0	0	0	0	0	0	0	0	0
sp|A4D1P6|WDR91_HUMAN	sp|A4D1P6|WDR91_HUMAN				0	0	0	0	0	0	0	0	0	0	0	0	0	0	0	0	0	0	0	0	0	0	0	0	0	0	0	0	0	0	0	0	0	0	0	0	0	0	0	0	0	0	0	0	0
sp|A4D1S0|KLRG2_HUMAN	sp|A4D1S0|KLRG2_HUMAN				0	0	0	0	0	0	0	0	0	0	0	0	0	0	0	0	5619800	0	0	0	1247600	0	0	2189000	0	0	0	0	0	0	0	0	0	0	0	0	0	0	0	0	0	0	0	3177200	0
sp|A4D1S5|RAB19_HUMAN	sp|A4D1S5|RAB19_HUMAN				0	0	0	0	0	0	0	0	0	0	0	0	0	0	0	0	0	0	0	0	0	109780000	0	0	13469000	0	0	0	0	0	0	0	0	0	0	0	0	0	0	0	0	0	0	0	0
sp|A5YKK6|CNOT1_HUMAN	sp|A5YKK6|CNOT1_HUMAN				10168000	0	0	0	0	0	4418700	5775900	0	0	0	0	0	0	3003900	5697900	6944900	0	4842100	0	9986900	0	0	7539900	0	4547700	0	0	3851600	0	0	885480	0	0	0	0	0	0	0	0	3235000	1570600	0	0	0
sp|A5YM72|CRNS1_HUMAN	sp|A5YM72|CRNS1_HUMAN	+			0	0	0	0	0	0	0	0	0	0	0	0	0	0	0	0	0	0	0	0	0	0	0	0	0	0	0	0	0	0	0	0	0	0	0	0	0	0	0	0	0	0	0	0	0
sp|A6NCN2|KR87P_HUMAN	sp|A6NCN2|KR87P_HUMAN				0	0	0	0	0	0	0	0	0	0	0	0	0	0	0	0	0	0	0	0	0	0	0	0	0	0	0	0	0	0	0	0	0	0	0	0	0	0	0	0	0	0	0	0	0
sp|A6NCS6|CB072_HUMAN	sp|A6NCS6|CB072_HUMAN				0	0	0	0	0	0	0	0	0	0	0	0	0	0	0	0	0	0	0	0	0	0	0	0	0	0	0	0	0	0	0	0	0	0	0	0	0	0	0	0	0	0	0	0	0
sp|A6NDU8|CE051_HUMAN	sp|A6NDU8|CE051_HUMAN				0	0	0	0	0	0	0	0	0	0	0	0	0	0	0	0	0	0	0	0	0	0	0	0	0	0	0	0	0	0	0	0	0	0	0	0	0	0	0	0	0	0	0	0	0
sp|A6NGR9|MROH6_HUMAN	sp|A6NGR9|MROH6_HUMAN				0	0	0	0	10898000	0	0	6195500	0	0	0	0	0	0	0	0	0	0	0	0	0	0	0	0	0	0	0	0	0	0	0	7277600	0	0	0	0	0	0	0	0	6299100	0	0	0	0
sp|A6NHL2|TBAL3_HUMAN	sp|A6NHL2|TBAL3_HUMAN	+			0	0	0	0	0	0	0	0	0	0	0	0	0	0	0	0	0	0	0	0	0	0	0	0	0	0	0	0	0	0	0	0	0	0	0	0	0	0	0	0	0	0	0	0	0
sp|A6NHR9|SMHD1_HUMAN	sp|A6NHR9|SMHD1_HUMAN				0	0	0	0	0	0	0	0	0	0	0	0	0	0	0	0	0	0	0	0	0	0	0	0	0	0	0	0	0	0	0	0	0	0	0	0	0	0	0	0	0	0	0	0	0
sp|A6NI28|RHG42_HUMAN	sp|A6NI28|RHG42_HUMAN				0	0	0	0	0	0	0	0	0	0	0	0	0	0	0	0	0	0	0	0	733040	0	0	0	0	0	0	0	0	0	0	0	0	0	0	0	0	0	0	0	0	0	0	0	0
sp|A6NKD9|CC85C_HUMAN	sp|A6NKD9|CC85C_HUMAN				0	0	0	0	0	0	0	0	5793000	0	2729600	0	0	0	0	0	0	0	0	0	0	0	0	0	0	0	0	0	0	0	0	0	0	0	0	0	0	0	1807700	0	0	0	0	0	0
sp|A6NKT7|RGPD3_HUMAN	sp|A6NKT7|RGPD3_HUMAN				0	0	0	7830200	0	0	5800800	5679700	0	0	0	0	0	0	0	0	0	0	7448600	8184400	0	0	0	6602000	0	0	0	0	7241300	0	0	4692800	0	0	0	0	0	0	0	0	6459900	0	0	5610000	0
sp|A7KAX9|RHG32_HUMAN;sp|Q7Z6I6|RHG30_HUMAN	sp|A7KAX9|RHG32_HUMAN				0	0	270220000	212720000	166720000	57402000	58815000	61374000	52188000	205730000	208830000	61487000	14286000	33897000	0	0	0	0	0	0	0	0	0	0	0	0	0	0	0	0	0	0	0	0	0	0	0	0	0	0	0	0	0	0	0
sp|A7MCY6|TBKB1_HUMAN	sp|A7MCY6|TBKB1_HUMAN				0	0	0	0	0	0	0	0	0	0	0	0	0	0	0	0	0	0	0	0	0	0	0	0	0	0	0	0	0	0	0	0	0	0	0	0	0	0	567630	0	0	0	0	0	0
sp|A8CG34|P121C_HUMAN;sp|Q96HA1|P121A_HUMAN;sp|A6NF01|P121B_HUMAN;sp|Q6PJE2|POZP3_HUMAN	sp|A8CG34|P121C_HUMAN;sp|Q96HA1|P121A_HUMAN;sp|A6NF01|P121B_HUMAN				0	0	0	0	0	0	0	0	0	0	0	0	0	0	0	0	0	0	0	0	5161800	0	0	0	0	0	0	0	0	0	0	0	0	0	0	0	0	0	0	0	0	0	0	0	0
sp|A8K8P3|SFI1_HUMAN	sp|A8K8P3|SFI1_HUMAN				0	0	0	0	0	0	0	0	0	0	0	0	0	0	0	0	0	0	0	0	0	0	0	0	1739100	0	0	0	0	0	0	0	0	0	0	0	0	0	0	0	0	0	0	0	0
sp|Q9BYP9|KRA99_HUMAN;sp|Q9BYQ3|KRA93_HUMAN;sp|Q9BYQ0|KRA98_HUMAN;sp|A8MTY7|KRA97_HUMAN;sp|Q9BYQ4|KRA92_HUMAN;sp|Q9BYQ2|KRA94_HUMAN;sp|A8MXZ3|KRA91_HUMAN	sp|Q9BYP9|KRA99_HUMAN;sp|Q9BYQ3|KRA93_HUMAN;sp|Q9BYQ0|KRA98_HUMAN;sp|A8MTY7|KRA97_HUMAN;sp|Q9BYQ4|KRA92_HUMAN;sp|Q9BYQ2|KRA94_HUMAN;sp|A8MXZ3|KRA91_HUMAN				0	0	0	0	0	0	0	0	0	0	0	0	0	0	0	0	0	0	0	0	0	0	0	0	0	0	0	0	0	0	0	0	0	0	0	0	0	0	0	0	0	0	0	0	0
sp|A8MUX0|KR161_HUMAN	sp|A8MUX0|KR161_HUMAN				0	0	0	0	0	0	0	0	0	0	0	0	0	0	0	0	0	0	0	0	0	0	0	0	0	0	0	0	0	0	0	0	0	0	0	0	0	0	0	0	0	0	0	0	0
sp|A8MVW0|F1712_HUMAN	sp|A8MVW0|F1712_HUMAN				0	0	0	0	0	0	0	0	0	0	0	0	0	0	0	0	0	0	0	0	0	0	0	0	0	0	0	0	0	0	0	0	0	0	0	0	0	0	0	0	0	0	0	0	0
sp|A8MVX0|ARG33_HUMAN	sp|A8MVX0|ARG33_HUMAN				0	0	0	0	0	0	0	0	0	0	0	0	0	0	0	0	0	0	0	0	0	0	0	0	0	0	0	0	0	0	0	0	0	0	0	0	0	0	0	0	0	0	0	0	0
sp|A8MWY0|K132L_HUMAN	sp|A8MWY0|K132L_HUMAN				0	0	0	0	0	0	0	0	0	0	0	2128300	0	0	0	0	0	0	0	0	0	0	0	0	0	0	0	0	0	0	0	0	0	0	0	0	0	0	0	0	0	0	0	0	0
sp|B2RTY4|MYO9A_HUMAN	sp|B2RTY4|MYO9A_HUMAN				0	0	16513000	26013000	35452000	1770000	8645900	676390	0	7488300	2226500	0	3502900	0	1838800	5065900	0	36543000	1732200	877660	6274900	0	9516000	12183000	0	22727000	0	0	21000000	0	0	8336500	0	0	0	0	0	0	0	0	1261600	0	0	1781000	0
sp|Q99613|EIF3C_HUMAN;sp|B5ME19|EIFCL_HUMAN	sp|Q99613|EIF3C_HUMAN;sp|B5ME19|EIFCL_HUMAN				0	0	0	0	0	0	0	0	0	0	0	0	0	0	0	0	0	0	0	0	0	0	0	774920	0	0	0	0	0	0	0	0	0	0	0	0	0	0	0	0	0	0	0	0	0
sp|P0CG08|GPHRB_HUMAN;sp|B7ZAQ6|GPHRA_HUMAN	sp|P0CG08|GPHRB_HUMAN;sp|B7ZAQ6|GPHRA_HUMAN				0	0	0	0	0	0	0	0	0	0	0	0	0	0	0	0	0	3327800	0	0	0	0	0	0	0	0	0	0	0	0	0	0	0	0	0	0	0	0	0	0	0	0	0	0	0
sp|E9PAV3|NACAM_HUMAN;sp|Q13765|NACA_HUMAN;sp|Q9BZK3|NACP1_HUMAN	sp|E9PAV3|NACAM_HUMAN;sp|Q13765|NACA_HUMAN				16267000	75264000	0	0	7870400	11707000	0	9250600	5188700	0	0	5621000	3541200	4898500	0	0	0	0	0	0	6028900	0	9960400	14032000	0	0	0	0	0	0	0	0	0	0	0	0	0	0	0	7941100	0	0	4123500	0	0
sp|E9PRG8|CK098_HUMAN	sp|E9PRG8|CK098_HUMAN				48420000	24542000	18555000	24676000	55351000	8913300	24591000	19606000	5735200	12604000	14419000	6294200	17140000	16511000	0	8077800	12545000	12005000	10471000	20956000	9937100	12568000	18801000	13716000	14204000	29411000	7587000	31420000	11324000	11538000	25219000	15303000	23217000	27479000	34773000	56106000	19290000	46203000	26016000	10319000	0	16412000	10356000	0	62469000
sp|O00116|ADAS_HUMAN	sp|O00116|ADAS_HUMAN				0	0	0	0	0	0	0	0	0	0	0	0	0	0	0	0	0	0	0	0	0	0	0	0	0	0	0	0	0	0	0	0	0	0	0	0	0	0	0	0	0	0	0	0	0
sp|O00139|KIF2A_HUMAN	sp|O00139|KIF2A_HUMAN				6750000	0	0	0	0	0	0	0	0	0	0	0	0	0	0	0	0	0	0	0	0	0	0	0	0	0	0	0	0	0	0	0	0	0	0	0	0	1539300	0	0	0	0	0	0	0
sp|O00148|DX39A_HUMAN;sp|Q13838|DX39B_HUMAN	sp|O00148|DX39A_HUMAN;sp|Q13838|DX39B_HUMAN				0	0	0	0	0	0	0	0	0	0	0	0	0	0	0	0	0	0	0	0	0	0	0	1495800	3491400	0	0	0	0	0	0	0	3584200	0	0	0	0	0	0	0	0	0	0	0	0
sp|O00151|PDLI1_HUMAN	sp|O00151|PDLI1_HUMAN				17307000	20945000	19472000	9161600	39132000	106510000	54060000	84334000	23030000	8971500	13795000	49129000	51018000	31121000	59877000	0	19898000	4124400	26926000	55319000	16183000	29247000	29918000	11321000	9174800	5593200	13954000	41931000	24626000	28572000	27863000	15720000	7862100	6890400	4545000	0	0	4521400	0	46044000	51771000	8997900	24072000	53095000	0
sp|O00161|SNP23_HUMAN	sp|O00161|SNP23_HUMAN				4486000	3123000	0	0	0	0	0	4209700	0	0	0	10486000	0	0	0	0	2769700	0	5505700	0	0	0	0	0	0	0	0	0	0	0	0	0	0	0	4416400	0	0	0	0	0	0	0	0	0	0
sp|O00170|AIP_HUMAN	sp|O00170|AIP_HUMAN				0	0	0	0	0	0	0	0	0	0	0	0	0	0	0	0	0	0	0	0	0	0	0	1437200	0	2080000	0	0	0	0	0	0	0	0	0	0	0	0	0	0	0	0	0	0	0
sp|O00178|GTPB1_HUMAN	sp|O00178|GTPB1_HUMAN				0	0	0	0	0	0	0	0	0	0	0	0	0	0	0	0	3099900	0	0	0	0	0	0	0	0	0	0	0	0	0	0	0	0	0	0	0	0	0	0	0	0	0	0	0	0
sp|O00186|STXB3_HUMAN	sp|O00186|STXB3_HUMAN				1953800	0	0	0	0	0	0	0	0	0	0	0	0	0	0	0	0	0	0	0	0	0	0	0	0	0	0	0	0	0	0	0	0	0	0	0	0	0	0	0	0	0	0	0	0
sp|O00193|SMAP_HUMAN	sp|O00193|SMAP_HUMAN				0	0	0	0	0	0	0	0	0	0	0	0	0	0	0	0	0	0	0	0	0	0	0	0	0	0	0	0	0	0	0	0	0	0	0	0	0	0	0	0	0	0	0	0	0
sp|O00203|AP3B1_HUMAN;sp|Q13367|AP3B2_HUMAN	sp|O00203|AP3B1_HUMAN				0	0	0	0	0	0	0	0	0	0	0	0	0	0	0	1600200	0	0	0	0	2070000	0	0	1504400	0	0	0	0	2191100	0	0	0	0	0	0	0	0	0	0	0	0	0	0	0	0
sp|O00213|APBB1_HUMAN	sp|O00213|APBB1_HUMAN				0	0	21029000	20825000	8948000	23569000	26343000	35698000	0	10056000	0	8252500	12169000	12355000	17951000	32390000	27557000	16791000	2743000	34156000	20801000	44929000	16653000	19495000	2082300	8647600	10064000	11142000	34272000	7042300	0	12629000	0	0	16476000	0	0	4425700	2550700	4842200	7367900	22059000	7995900	24953000	0
sp|O00232|PSD12_HUMAN	sp|O00232|PSD12_HUMAN				0	0	0	0	0	0	0	0	0	0	0	0	0	0	0	0	0	0	0	0	0	0	0	0	0	0	0	0	0	0	0	0	0	0	0	0	0	0	0	0	0	0	0	0	0
sp|O00264|PGRC1_HUMAN	sp|O00264|PGRC1_HUMAN				33497000	8065700	0	0	0	2978400	0	7159800	8192000	0	0	0	0	0	11255000	0	3292300	0	2233700	0	0	0	7887800	6782300	0	0	0	0	0	0	0	0	0	0	0	0	0	0	0	0	0	0	0	0	0
sp|O00291|HIP1_HUMAN	sp|O00291|HIP1_HUMAN				0	0	0	0	0	0	0	0	0	0	0	0	0	0	0	0	0	0	0	0	6058900	0	0	2329700	0	0	0	0	0	0	0	0	0	0	0	0	0	0	0	0	0	0	0	0	0
sp|O00299|CLIC1_HUMAN	sp|O00299|CLIC1_HUMAN				0	0	0	0	0	0	0	0	0	0	0	0	0	0	0	0	0	0	0	0	0	0	0	0	0	0	0	0	0	0	0	0	0	0	0	0	0	0	0	0	0	0	0	0	0
sp|O00303|EIF3F_HUMAN	sp|O00303|EIF3F_HUMAN				0	0	0	0	0	0	0	0	0	0	0	0	0	0	0	0	0	0	0	0	0	0	0	0	0	0	0	0	0	0	0	0	0	0	0	0	0	0	0	0	0	0	0	0	0
sp|O00311|CDC7_HUMAN	sp|O00311|CDC7_HUMAN				0	0	0	0	0	0	0	0	0	0	0	0	0	0	0	0	0	0	0	0	0	0	0	0	0	0	0	0	0	0	0	0	0	0	0	0	0	0	0	0	0	0	0	0	0
sp|O00400|ACATN_HUMAN	sp|O00400|ACATN_HUMAN				7554100	26744000	0	0	0	9659400	0	11436000	0	0	0	0	0	0	15432000	5197300	16151000	0	11383000	9042000	1914200	0	4879600	2220100	0	4624900	6290400	0	10899000	5866100	0	9688500	0	0	0	0	0	0	0	0	0	0	0	1715400	0
sp|O00401|WASL_HUMAN	sp|O00401|WASL_HUMAN				0	0	72228000	43425000	10899000	0	0	0	0	0	0	0	0	0	0	0	0	0	0	0	0	0	0	0	0	0	0	0	0	0	0	0	0	0	0	0	0	0	0	0	0	0	0	0	0
sp|O00410|IPO5_HUMAN	sp|O00410|IPO5_HUMAN				0	15794000	0	0	0	0	0	0	0	0	0	0	0	0	0	2740600	7880200	0	3391000	5883000	5053400	1737800	4419300	4115600	25978000	8730400	3961300	0	1657900	5550700	0	4818000	4159100	0	0	0	0	0	8011900	0	4569100	9996100	0	1835100	0
sp|O00425|IF2B3_HUMAN	sp|O00425|IF2B3_HUMAN	+			0	0	0	0	0	0	0	0	0	0	0	0	0	0	0	0	0	0	0	0	0	0	0	0	0	0	0	0	0	0	0	0	0	0	0	0	0	0	0	0	0	0	0	0	0
sp|O00429|DNM1L_HUMAN	sp|O00429|DNM1L_HUMAN				744280000	543460000	1995800000	2003300000	511040000	1703900000	1961800000	1349600000	899380000	841390000	459220000	35399000	722520000	754640000	1310600000	491910000	873980000	688880000	1447400000	1892100000	400650000	457250000	541300000	104660000	261020000	146910000	774390000	787960000	929350000	1635400000	1347100000	1086100000	796050000	585790000	833680000	463250000	305110000	406980000	1681700000	877690000	2833200000	1633500000	1295100000	2957300000	835290000
sp|O00443|P3C2A_HUMAN	sp|O00443|P3C2A_HUMAN				0	0	14344000	0	0	24449000	50971000	37338000	4205100	12239000	39588000	41275000	2544300	2425700	15168000	4967500	8405200	0	21173000	17457000	22277000	3094800	12001000	45180000	10820000	0	946100	0	21809000	5970900	0	14897000	0	0	2530400	0	0	0	1282500	0	18307000	0	0	133690000	60681000
sp|O00458|IFRD1_HUMAN	sp|O00458|IFRD1_HUMAN				0	0	0	0	0	0	0	0	0	0	0	0	0	0	0	0	0	0	0	0	0	0	0	0	0	0	0	0	0	0	0	0	0	0	0	0	0	0	0	0	0	0	0	0	0
sp|O00459|P85B_HUMAN	sp|O00459|P85B_HUMAN				0	0	0	0	0	0	0	0	0	0	0	0	0	0	0	1591900	0	0	0	0	0	0	0	0	0	0	0	0	454210	0	0	0	0	0	0	0	0	0	0	0	0	0	0	0	0
sp|O00471|EXOC5_HUMAN	sp|O00471|EXOC5_HUMAN				0	0	1698200	0	0	0	0	0	0	0	0	0	0	0	0	0	0	0	0	0	69154000	50018000	76905000	0	0	0	21124000	41451000	16097000	0	0	0	0	0	0	0	0	0	3535800	0	0	0	0	0	8807900
sp|O00483|NDUA4_HUMAN	sp|O00483|NDUA4_HUMAN				4421200	3143500	0	5896400	0	0	3893900	0	6176000	10390000	4045900	6337600	6590600	7164900	0	0	9763200	0	0	7991600	0	0	4050100	0	0	2193400	0	0	0	0	0	2245800	20405000	5047400	0	13687000	0	0	4290400	2558400	0	0	0	0	12779000
sp|O00505|IMA4_HUMAN	sp|O00505|IMA4_HUMAN				0	0	0	0	0	0	0	0	0	0	0	0	0	0	0	0	0	0	0	0	0	0	0	0	0	0	0	0	0	0	0	0	0	0	0	0	0	0	0	0	0	0	0	0	0
sp|O00522|KRIT1_HUMAN	sp|O00522|KRIT1_HUMAN				0	0	0	0	0	0	0	0	0	0	0	0	0	0	0	0	0	0	0	0	0	0	0	0	0	0	0	0	0	0	0	0	0	0	0	0	0	0	0	0	0	0	0	0	0
sp|O00541|PESC_HUMAN	sp|O00541|PESC_HUMAN				39238000	16655000	9516000	1648300	7813000	1580100	6460700	3957700	0	14870000	0	0	16907000	12695000	0	0	1936500	0	2993100	306540	0	0	0	1164500	2110100	0	13625000	0	0	0	969810	0	11994000	7830000	0	28241000	4623900	0	10112000	10495000	0	11868000	5459500	0	13190000
sp|O00559|RCAS1_HUMAN	sp|O00559|RCAS1_HUMAN				0	0	0	0	0	0	0	0	0	0	0	0	0	0	0	0	0	0	0	0	0	0	0	0	0	0	0	0	0	0	0	0	0	0	0	0	0	0	0	0	0	0	0	0	0
sp|O00560|SDCB1_HUMAN	sp|O00560|SDCB1_HUMAN				0	0	0	0	0	0	0	0	0	0	0	0	0	0	0	0	0	0	0	1425300	0	0	0	0	0	0	0	0	0	0	0	0	0	0	0	0	0	0	0	0	1372300	0	0	0	0
sp|O00567|NOP56_HUMAN	sp|O00567|NOP56_HUMAN				38056000	30356000	39072000	20570000	0	0	34787000	0	23040000	101710000	69034000	9401500	154700000	147750000	0	9186600	0	5980700	0	0	22783000	0	2876900	31660000	7390800	23792000	0	0	18851000	0	0	17625000	7632400	22960000	0	23356000	8893700	1265600	3280300	70885000	0	6105800	25527000	0	4104300
sp|O00571|DDX3X_HUMAN;sp|O15523|DDX3Y_HUMAN	sp|O00571|DDX3X_HUMAN;sp|O15523|DDX3Y_HUMAN				21674000	15262000	38230000	9259400	6273900	41450000	81281000	48735000	32946000	7189700	7331800	0	0	8560000	77118000	8589400	42412000	16921000	38089000	86510000	13991000	37087000	42871000	444620	1139800	3633600	6141900	2336600	7205300	29642000	1731600	1624800	0	4689600	6382100	0	0	0	7691400	2606100	31599000	9477500	9315200	55602000	0
sp|O00592|PODXL_HUMAN	sp|O00592|PODXL_HUMAN				0	0	0	0	0	0	0	0	0	0	0	0	0	0	0	6358500	0	0	0	0	0	0	0	2674200	0	0	0	0	0	0	0	0	0	0	0	0	0	0	0	0	0	0	0	0	0
sp|O00629|IMA3_HUMAN	sp|O00629|IMA3_HUMAN				0	0	0	0	0	0	0	0	0	0	0	0	0	0	0	0	0	0	0	0	0	0	0	0	0	0	0	0	0	0	0	0	0	0	0	0	0	0	0	0	0	0	0	0	0
sp|O00750|P3C2B_HUMAN	sp|O00750|P3C2B_HUMAN				0	0	0	0	3551600	3995000	3711100	13833000	0	0	0	0	0	0	3094300	0	0	0	0	4595500	3221900	0	0	0	0	0	0	0	3224400	0	0	0	0	0	0	0	0	0	0	0	10618000	0	0	25261000	0
sp|O00763|ACACB_HUMAN	sp|O00763|ACACB_HUMAN				0	0	327720000	178810000	255710000	76022000	36050000	134340000	0	235450000	328040000	0	176390000	97736000	11793000	32532000	13810000	77676000	27360000	64161000	141160000	169170000	7523500	470650000	690120000	96354000	7873000	115350000	122040000	70680000	281160000	293890000	43419000	78772000	846520000	66976000	113160000	1179500000	68172000	580690000	78176000	32761000	697540000	5567200	0
sp|O14497|ARI1A_HUMAN	sp|O14497|ARI1A_HUMAN				0	0	0	0	0	0	0	0	0	0	0	0	0	0	0	0	0	0	0	0	0	0	0	0	0	0	0	0	0	0	0	0	0	0	0	0	0	0	0	0	0	0	0	0	0
sp|O14523|C2C2L_HUMAN	sp|O14523|C2C2L_HUMAN				0	0	0	0	0	0	0	0	0	0	0	0	0	0	2011700	1571800	2574100	1949500	0	1682300	0	0	0	0	0	0	0	0	1399100	0	0	0	0	0	0	0	0	0	0	0	0	0	0	0	0
sp|O14530|TXND9_HUMAN	sp|O14530|TXND9_HUMAN				0	0	0	0	0	0	0	0	0	0	0	0	0	0	0	0	0	0	0	0	0	0	6068500	0	0	0	0	0	0	0	0	0	0	0	4626200	0	0	0	0	0	0	0	0	0	0
sp|O14531|DPYL4_HUMAN	sp|O14531|DPYL4_HUMAN				0	0	4405800	0	0	4167100	6784900	0	0	2111100	0	0	0	0	0	0	0	0	0	2836400	0	0	0	0	0	0	0	0	0	0	4924600	0	0	0	4577100	0	0	3905200	0	0	3449900	0	0	7389800	0
sp|O14545|TRAD1_HUMAN	sp|O14545|TRAD1_HUMAN				0	0	0	0	0	0	0	0	0	0	0	0	0	0	0	0	0	0	0	0	0	0	0	0	0	0	0	0	0	0	0	0	0	0	0	0	0	0	0	0	0	0	0	0	0
sp|O14559|RHG33_HUMAN	sp|O14559|RHG33_HUMAN				0	0	0	0	0	0	0	0	0	0	0	0	0	0	0	0	0	0	0	0	0	0	0	0	0	0	0	0	0	0	0	0	0	0	0	0	0	0	0	0	0	0	0	0	0
sp|O14562|UBFD1_HUMAN	sp|O14562|UBFD1_HUMAN				0	0	0	0	0	0	0	0	0	0	0	0	0	1655500	0	0	0	0	0	0	0	0	0	0	0	0	0	0	0	0	0	0	0	0	0	0	0	0	0	0	0	0	0	0	0
sp|O14578|CTRO_HUMAN	sp|O14578|CTRO_HUMAN				0	0	0	0	0	0	0	0	0	0	0	0	0	0	0	0	9224000	0	0	13623000	0	0	0	0	0	0	0	0	0	0	0	0	0	0	0	0	0	0	0	0	0	0	0	6041500	0
sp|O14607|UTY_HUMAN	sp|O14607|UTY_HUMAN				0	0	0	0	0	0	0	0	0	0	0	0	0	0	0	0	0	0	0	0	0	0	0	0	0	0	0	0	0	0	0	0	0	0	0	0	0	0	0	0	0	0	0	0	0
sp|O14613|BORG1_HUMAN	sp|O14613|BORG1_HUMAN				0	0	29617000	16320000	22445000	0	0	0	0	0	0	0	0	0	0	0	0	0	0	0	0	0	0	0	0	0	0	0	0	0	0	0	0	0	0	0	0	0	0	0	0	0	0	0	0
sp|O14617|AP3D1_HUMAN	sp|O14617|AP3D1_HUMAN				180550000	144260000	134630000	203900000	185290000	95231000	72702000	86871000	77784000	85553000	96493000	70198000	134220000	145920000	96762000	196310000	69986000	174040000	89844000	54034000	169300000	57911000	35995000	155750000	81338000	173740000	85319000	0	241110000	56047000	37273000	272680000	136540000	114130000	147440000	173580000	164960000	201980000	106570000	196170000	112710000	109260000	112200000	158540000	123900000
sp|O14618|CCS_HUMAN	sp|O14618|CCS_HUMAN				0	0	0	0	0	0	0	0	0	0	0	0	0	0	0	0	0	0	0	0	0	0	0	0	0	0	0	0	0	0	0	0	0	0	0	0	0	0	0	0	0	0	0	0	0
sp|O14639|ABLM1_HUMAN	sp|O14639|ABLM1_HUMAN				0	0	0	0	0	0	0	0	0	0	0	0	0	0	0	0	0	0	0	0	0	0	0	0	0	0	0	0	0	0	0	0	0	0	0	0	0	0	0	0	0	0	0	0	0
sp|O14640|DVL1_HUMAN;sp|P54792|DVLP1_HUMAN	sp|O14640|DVL1_HUMAN;sp|P54792|DVLP1_HUMAN				0	0	9502900	7920900	0	0	9322000	5934800	0	0	0	0	0	0	3560900	0	0	0	10875000	5392300	0	0	5364100	0	0	0	8459300	0	5666800	14433000	0	0	5266100	0	0	0	0	0	4357200	3027400	0	5770500	0	21734000	0
sp|O14641|DVL2_HUMAN	sp|O14641|DVL2_HUMAN				11499000	6106600	145430000	122510000	130770000	89029000	144580000	68483000	3320600	111150000	35596000	7445800	104610000	132060000	135130000	165280000	154470000	165710000	86180000	158150000	40261000	126900000	40138000	41983000	38867000	44652000	56584000	135830000	221290000	118610000	132400000	74164000	56751000	8468700	37721000	25517000	16599000	6943000	84285000	72524000	73048000	155120000	92710000	125790000	0
sp|O14646|CHD1_HUMAN	sp|O14646|CHD1_HUMAN				0	5460400	0	0	0	0	0	0	0	0	0	0	0	0	0	3358600	0	3892900	0	0	0	0	0	1198900	0	0	0	0	2019100	0	0	0	0	3656100	0	0	0	255000	0	0	0	0	0	0	0
sp|O14647|CHD2_HUMAN	sp|O14647|CHD2_HUMAN				0	0	0	1168600	0	0	0	0	0	0	0	0	0	0	0	3219100	0	3523100	0	0	0	0	0	3858800	0	0	0	0	0	0	0	0	0	0	0	0	0	0	0	0	0	0	0	0	0
sp|O14653|GOSR2_HUMAN	sp|O14653|GOSR2_HUMAN				0	0	0	0	0	0	0	0	0	0	0	0	0	0	0	0	0	0	0	0	0	0	0	0	0	0	0	0	0	0	0	0	0	0	0	0	0	0	0	0	0	0	0	0	0
sp|O14654|IRS4_HUMAN	sp|O14654|IRS4_HUMAN				341180000	135560000	464540000	407040000	1149500000	519820000	454900000	898040000	257490000	241570000	295940000	305280000	400780000	314820000	781640000	916780000	574460000	782960000	838420000	555210000	1029800000	180070000	529950000	1032200000	208840000	1158400000	550340000	58511000	589750000	414400000	84718000	712750000	0	0	582480000	0	0	224010000	0	338380000	434920000	0	111580000	444970000	0
sp|O14681|EI24_HUMAN	sp|O14681|EI24_HUMAN				0	0	0	0	0	0	0	0	0	0	0	0	0	0	0	0	0	0	0	0	0	0	0	0	0	2696000	0	0	0	0	0	0	0	0	0	0	0	0	0	0	0	0	0	0	0
sp|O14683|P5I11_HUMAN	sp|O14683|P5I11_HUMAN				0	14192000	0	0	0	4684800	1783500	7126600	5439200	0	0	0	0	0	6056300	15109000	5196200	7951000	0	5321300	5088200	0	0	0	0	0	0	0	0	0	0	2862900	0	0	0	0	0	0	0	0	0	0	0	0	0
sp|O14686|KMT2D_HUMAN	sp|O14686|KMT2D_HUMAN				0	0	0	0	0	0	0	0	0	0	0	0	0	0	0	0	0	0	0	0	0	0	0	0	0	0	0	0	0	0	0	0	0	0	0	0	0	0	0	0	0	0	0	0	0
sp|O14727|APAF_HUMAN	sp|O14727|APAF_HUMAN				0	0	0	0	0	0	0	0	0	0	0	0	0	0	0	0	0	0	0	0	0	0	0	0	732460	0	0	0	0	0	0	0	0	0	0	0	0	0	0	0	0	0	0	0	0
sp|O14733|MP2K7_HUMAN	sp|O14733|MP2K7_HUMAN	+			0	0	0	0	0	0	0	0	0	0	0	0	0	0	0	0	0	0	0	0	0	0	0	0	0	0	0	0	0	0	0	0	0	0	0	0	0	0	0	0	0	0	0	0	0
sp|O14735|CDIPT_HUMAN	sp|O14735|CDIPT_HUMAN				0	0	0	0	0	0	0	0	0	0	0	0	0	0	0	0	0	0	0	0	0	0	0	0	0	0	0	0	0	0	0	0	0	0	0	0	0	0	0	0	0	0	0	0	0
sp|O14737|PDCD5_HUMAN	sp|O14737|PDCD5_HUMAN				3386900	0	0	0	5042200	2680700	3090800	5445700	1830600	0	0	2140100	0	0	0	0	3407900	0	0	1994100	0	0	2299500	1444400	0	0	0	0	0	0	0	0	0	0	0	0	0	0	0	0	0	0	0	0	0
sp|O14744|ANM5_HUMAN	sp|O14744|ANM5_HUMAN				0	0	0	0	0	0	0	0	0	0	0	0	0	0	0	0	0	0	0	0	0	0	0	0	0	0	0	0	0	0	0	0	0	0	0	0	0	0	0	0	0	0	0	0	0
sp|O14776|TCRG1_HUMAN;sp|Q5VWI1|TCRGL_HUMAN	sp|O14776|TCRG1_HUMAN				7656000	0	0	4372000	0	6997800	7241600	7051300	5965100	0	0	14140000	0	0	4558700	0	0	0	3693100	0	10943000	0	0	0	0	0	0	0	0	0	0	0	0	0	0	0	0	0	0	0	898900	0	0	0	0
sp|O14777|NDC80_HUMAN	sp|O14777|NDC80_HUMAN				0	0	0	0	0	0	0	0	0	0	0	0	0	0	0	0	0	0	0	0	0	0	0	0	0	0	0	0	0	0	0	0	0	0	0	0	0	0	34542000	5499100	52529000	0	0	0	0
sp|O14782|KIF3C_HUMAN	sp|O14782|KIF3C_HUMAN				0	0	0	0	0	0	0	0	0	0	0	0	0	0	0	0	0	0	0	0	0	0	3939100	0	0	0	0	0	0	0	0	0	0	0	0	0	0	0	0	0	0	0	0	0	0
sp|O14795|UN13B_HUMAN	sp|O14795|UN13B_HUMAN				0	0	0	0	0	4191300	3303600	0	0	0	0	0	0	0	2288300	0	0	0	0	0	2699700	5273100	6509100	4137800	0	0	0	0	3979900	0	0	5490700	0	0	0	0	0	0	0	0	5298100	0	0	31674000	0
sp|O14802|RPC1_HUMAN	sp|O14802|RPC1_HUMAN				0	0	0	0	0	0	0	0	0	0	0	0	0	0	0	0	0	0	0	0	1346200	0	0	7026600	0	6265500	0	0	0	0	0	0	0	0	0	0	0	0	0	0	0	0	0	0	0
sp|O14828|SCAM3_HUMAN	sp|O14828|SCAM3_HUMAN				10861000	13838000	0	0	0	6572400	0	0	0	0	0	4932400	0	0	12627000	0	0	0	0	0	0	0	0	2765200	0	0	0	0	7777700	0	0	0	0	0	0	0	0	0	0	0	0	0	0	0	0
sp|O14867|BACH1_HUMAN	sp|O14867|BACH1_HUMAN				0	0	0	0	0	0	0	0	0	0	0	0	0	0	0	0	0	0	0	0	0	0	0	0	0	0	0	0	0	0	0	0	0	0	0	0	0	0	0	0	0	0	0	0	0
sp|O14908|GIPC1_HUMAN	sp|O14908|GIPC1_HUMAN				0	0	0	0	0	0	0	0	0	0	0	0	0	0	0	0	0	0	0	0	0	0	0	0	0	0	0	0	0	0	0	0	0	0	0	0	0	0	0	0	0	0	0	0	0
sp|O14925|TIM23_HUMAN;sp|Q5SRD1|TI23B_HUMAN	sp|O14925|TIM23_HUMAN;sp|Q5SRD1|TI23B_HUMAN				0	0	0	0	0	0	0	0	0	0	0	0	0	0	0	0	0	0	0	0	0	0	0	0	0	0	0	0	0	0	0	0	0	0	0	0	0	0	0	0	0	0	0	0	7120500
sp|O14929|HAT1_HUMAN	sp|O14929|HAT1_HUMAN				0	0	0	0	0	0	0	0	0	0	0	0	0	0	0	0	0	0	0	0	0	0	0	0	0	0	0	0	0	0	0	0	0	0	0	0	0	0	0	0	0	0	0	0	0
sp|O14964|HGS_HUMAN	sp|O14964|HGS_HUMAN				0	0	0	3229000	0	0	0	5744100	0	0	0	0	0	0	6756300	6258200	0	5562900	0	5624400	7071200	0	7324500	7139900	0	6902000	0	0	5570300	4135700	0	3025800	0	0	0	0	0	0	0	0	0	0	0	0	0
sp|O14965|AURKA_HUMAN	sp|O14965|AURKA_HUMAN				0	0	0	0	0	981340	0	0	0	0	0	0	0	0	0	0	0	0	0	0	0	0	0	0	0	0	0	0	0	0	0	0	0	0	0	0	0	0	0	0	0	0	0	0	0
sp|O14966|RAB7L_HUMAN	sp|O14966|RAB7L_HUMAN				0	0	52949000	43923000	57347000	47359000	38723000	61290000	34862000	26506000	37774000	54685000	19471000	30988000	42827000	23076000	29497000	30857000	49061000	40184000	11562000	45553000	59547000	11493000	43814000	56511000	65886000	93153000	55646000	101580000	80487000	53601000	24342000	10117000	18352000	0	0	7078700	8064800	20766000	58609000	8131900	39093000	31749000	3225000
sp|O14967|CLGN_HUMAN	sp|O14967|CLGN_HUMAN				0	0	0	0	0	0	0	0	0	0	0	0	0	0	0	2970300	0	0	0	0	0	0	0	0	0	0	0	0	0	0	0	0	0	0	0	0	0	0	0	0	0	0	0	0	0
sp|O14974|MYPT1_HUMAN	sp|O14974|MYPT1_HUMAN				0	0	0	0	0	1234900	0	610480	1826500	0	787950	0	0	0	1570100	0	500070	393940	523140	637680	0	859560	1297300	0	0	0	0	0	846330	0	0	0	0	0	0	0	0	0	0	0	0	0	0	0	0
sp|O14976|GAK_HUMAN	sp|O14976|GAK_HUMAN				0	0	1175200	0	0	3082200	5024700	11293000	0	0	0	0	0	0	6078200	4267800	0	2689000	9771000	7002200	6321500	0	3915300	2019100	0	0	0	0	2435500	2938500	0	5101300	0	0	3107500	0	0	0	0	0	23404000	0	0	69913000	0
sp|O14980|XPO1_HUMAN	sp|O14980|XPO1_HUMAN				0	14965000	0	0	0	0	0	0	0	0	0	0	0	0	0	6490000	3733300	5391800	0	1457100	0	0	0	0	0	0	0	0	1194000	4719700	0	3527900	3222500	0	0	0	0	0	0	0	3748900	2049000	0	4094300	0
sp|O14981|BTAF1_HUMAN	sp|O14981|BTAF1_HUMAN				0	0	0	0	0	0	1931800	0	0	0	0	0	0	0	0	2307700	0	0	0	0	9425000	0	0	3761400	0	0	0	0	0	0	0	6113900	0	0	0	0	0	0	0	0	0	0	0	14014000	0
sp|O14986|PI51B_HUMAN	sp|O14986|PI51B_HUMAN	+			0	0	0	0	0	0	0	0	0	0	0	0	0	0	0	0	0	0	0	0	0	0	0	0	0	0	0	0	0	0	0	0	0	0	0	0	0	0	0	0	0	0	0	0	0
sp|O15013|ARHGA_HUMAN	sp|O15013|ARHGA_HUMAN				0	0	0	0	0	0	0	0	0	0	0	0	0	0	0	0	0	0	0	0	65147000	155720000	48666000	0	0	0	0	0	0	0	0	0	0	0	0	0	0	0	0	0	0	0	0	0	0
sp|O15014|ZN609_HUMAN	sp|O15014|ZN609_HUMAN				0	0	0	0	0	0	0	0	0	0	0	0	0	0	0	0	0	0	0	0	0	0	0	0	0	0	0	0	0	0	0	0	0	0	0	0	0	0	0	0	0	0	0	0	0
sp|O15020|SPTN2_HUMAN	sp|O15020|SPTN2_HUMAN				0	0	0	70492000	0	0	0	0	0	0	89481000	0	0	0	0	0	0	0	0	0	0	0	0	0	0	0	0	0	0	0	0	0	0	0	0	0	0	0	0	0	0	0	0	0	0
sp|O15027|SC16A_HUMAN	sp|O15027|SC16A_HUMAN				4476900	0	5990100	4294900	3073400	4090100	8877400	9092800	0	24463000	12529000	0	5311500	12399000	9320800	53571000	19941000	52061000	7600700	40021000	5615800	2589900	2822800	3024900	4059000	6783900	7008400	0	23162000	0	0	15899000	0	0	881520	3070600	0	0	5122600	5173800	0	21621000	0	542110	0
sp|O15037|KHNYN_HUMAN	sp|O15037|KHNYN_HUMAN				0	0	0	0	0	0	0	0	0	0	0	0	0	0	0	0	0	0	0	0	0	0	0	0	0	0	0	0	0	0	0	0	0	0	0	0	0	0	0	0	0	0	0	0	0
sp|O15040|TCPR2_HUMAN	sp|O15040|TCPR2_HUMAN				0	0	0	0	0	0	0	0	0	0	0	0	0	0	0	0	0	0	0	0	0	0	0	0	0	0	0	0	0	0	0	0	0	0	0	0	0	0	0	0	0	0	0	0	0
sp|O15042|SR140_HUMAN	sp|O15042|SR140_HUMAN				0	0	0	4997000	12026000	0	2467100	0	0	0	0	0	0	0	0	0	0	3154300	0	0	0	0	0	0	0	4971900	0	0	0	1714700	0	4255100	4247700	5243000	2963300	0	2754800	62525000	0	0	867070	6049000	0	0	3660500
sp|O15047|SET1A_HUMAN	sp|O15047|SET1A_HUMAN				0	0	0	0	0	0	0	0	0	0	0	0	0	0	0	0	0	0	0	0	0	0	0	0	0	0	0	0	0	0	0	0	0	0	0	0	0	0	0	0	0	0	0	0	0
sp|O15056|SYNJ2_HUMAN	sp|O15056|SYNJ2_HUMAN				0	0	7092100	0	0	0	5835800	3151600	6065700	32204000	4339300	37514000	5796000	16066000	0	0	0	0	0	0	5434000	0	0	2299800	0	0	0	0	2775900	0	0	0	0	0	0	0	0	0	0	0	0	0	0	8903100	0
sp|O15063|K0355_HUMAN	sp|O15063|K0355_HUMAN				299640000	31860000	77953000	16007000	0	92016000	0	145990000	0	255510000	192600000	19176000	0	0	104940000	63506000	0	0	0	0	38988000	14970000	134730000	0	0	203380000	0	129440000	0	0	0	0	0	0	5419300	0	0	815710000	0	797400000	0	0	0	0	418610000
sp|O15067|PUR4_HUMAN	sp|O15067|PUR4_HUMAN				0	0	0	2703800	0	0	0	2518000	0	0	0	0	0	0	0	0	0	0	0	4207200	1482500	0	0	0	2494600	1543700	0	0	3718500	0	0	0	0	0	0	0	0	0	0	0	0	0	0	0	0
sp|O15078|CE290_HUMAN	sp|O15078|CE290_HUMAN				0	0	0	0	0	0	0	0	0	0	0	0	0	0	0	0	0	0	0	0	0	0	1818500	0	0	0	0	0	0	0	0	0	0	0	0	0	0	0	11216000	0	49572000	0	0	0	0
sp|O15083|ERC2_HUMAN	sp|O15083|ERC2_HUMAN				0	0	0	0	0	0	0	0	0	0	0	4243500	0	0	5067500	0	0	0	0	0	8341200	10339000	27283000	0	0	0	0	0	2067200	0	0	0	0	0	0	0	0	0	0	0	0	0	0	0	0
sp|O15084|ANR28_HUMAN	sp|O15084|ANR28_HUMAN				0	0	0	0	0	0	0	0	0	0	0	0	0	0	0	0	0	0	0	0	0	0	0	0	0	0	0	0	0	0	0	0	0	0	0	0	0	0	0	0	0	0	0	0	0
sp|O15085|ARHGB_HUMAN	sp|O15085|ARHGB_HUMAN				0	0	86993000	72371000	34763000	36123000	35473000	5192600	0	0	1308900	0	0	0	0	0	0	0	0	0	0	0	0	0	0	0	0	0	0	0	0	0	0	0	0	0	0	0	0	0	0	0	0	0	0
sp|O15091|MRRP3_HUMAN	sp|O15091|MRRP3_HUMAN				0	0	0	0	0	0	0	0	0	0	0	0	0	0	0	0	0	0	0	0	0	0	0	102470	0	0	0	0	0	0	0	0	0	0	0	0	0	0	0	0	0	0	0	0	0
sp|O15126|SCAM1_HUMAN	sp|O15126|SCAM1_HUMAN				0	16572000	0	0	0	9261600	4771400	12668000	3957800	3019700	2539000	0	4581600	0	0	8569500	0	7170900	4798900	12887000	0	0	0	0	0	0	0	4979200	14919000	0	0	0	0	0	0	0	0	0	0	0	0	7988000	0	0	0
sp|O15155|BET1_HUMAN	sp|O15155|BET1_HUMAN				0	0	0	0	0	2252100	1996800	0	0	0	0	0	0	0	0	0	9521200	0	0	3913600	0	0	0	0	0	0	0	0	0	0	0	0	0	0	0	0	0	0	0	0	0	0	0	0	0
sp|O15173|PGRC2_HUMAN	sp|O15173|PGRC2_HUMAN				517480000	515000000	63594000	110550000	257570000	111150000	71760000	286790000	135990000	72831000	87649000	130360000	149690000	69740000	286520000	226460000	127630000	149220000	195200000	163600000	166110000	226140000	346410000	256040000	250980000	350710000	128810000	201260000	113870000	180640000	156230000	71350000	92560000	91275000	388510000	96821000	101440000	59005000	25187000	79566000	70946000	17948000	106850000	70133000	57379000
sp|O15235|RT12_HUMAN	sp|O15235|RT12_HUMAN				15043000	0	9230300	25710000	17558000	0	6158100	14580000	14089000	0	0	13174000	49584000	47686000	0	6216500	24972000	6919100	10079000	17855000	5224400	0	0	0	0	29347000	0	13340000	0	0	13480000	12082000	28652000	0	29898000	48092000	0	51840000	12265000	41115000	16286000	0	32660000	0	27465000
sp|O15258|RER1_HUMAN	sp|O15258|RER1_HUMAN				0	0	0	0	0	0	0	0	0	0	0	0	0	0	0	0	0	0	0	0	0	0	0	0	0	0	0	0	0	0	0	0	0	0	0	0	0	0	0	0	0	0	0	0	0
sp|O15260|SURF4_HUMAN	sp|O15260|SURF4_HUMAN				0	0	0	0	0	0	0	0	0	0	0	0	0	0	0	1334800	1979700	0	0	0	0	0	0	0	0	0	0	0	0	0	0	0	0	0	0	16747000	0	0	0	0	0	0	0	0	0
sp|O15269|SPTC1_HUMAN	sp|O15269|SPTC1_HUMAN				0	0	0	0	0	0	0	0	0	0	0	0	0	0	0	0	0	0	0	0	0	0	0	5219900	0	0	0	0	0	0	0	0	0	0	0	0	0	0	0	0	2621200	0	0	0	0
sp|O15294|OGT1_HUMAN	sp|O15294|OGT1_HUMAN				0	0	3305100	3921900	0	0	5682300	4042400	0	0	0	0	0	4470000	0	0	0	4208200	2710100	2698100	3777200	0	2605100	2455400	0	3316900	0	0	2539700	0	0	3175200	0	0	3795100	0	0	0	0	0	2260700	6022300	9041100	0	0
sp|O15355|PPM1G_HUMAN	sp|O15355|PPM1G_HUMAN				1405600	0	0	0	0	0	0	0	0	0	0	0	0	0	0	0	0	0	0	0	0	0	0	0	0	0	0	0	0	0	0	0	0	0	0	0	0	0	0	0	0	0	0	0	0
sp|O15357|SHIP2_HUMAN	sp|O15357|SHIP2_HUMAN				0	0	5690300	0	2186500	0	0	1605600	12635000	69809000	178910000	0	0	0	0	0	0	0	0	0	0	354190	0	0	0	0	0	0	1652000	0	0	0	0	0	0	0	0	0	0	0	0	0	0	0	0
sp|O15360|FANCA_HUMAN	sp|O15360|FANCA_HUMAN				0	0	0	0	0	0	0	0	0	0	0	0	0	0	0	0	0	0	0	0	0	0	0	0	0	0	0	0	0	0	0	0	0	0	0	0	0	0	0	0	0	0	0	0	0
sp|O15371|EIF3D_HUMAN	sp|O15371|EIF3D_HUMAN				0	0	0	0	0	0	0	0	0	0	0	0	0	0	0	0	0	0	0	0	0	0	0	0	0	0	0	0	0	0	0	0	0	0	0	0	0	0	0	0	0	0	0	0	0
sp|O15372|EIF3H_HUMAN	sp|O15372|EIF3H_HUMAN				0	0	0	0	0	218700	0	0	0	0	0	0	0	0	0	0	607620	0	0	438310	0	150840	0	0	156020	0	0	0	609160	0	0	0	0	0	0	0	0	0	0	0	0	0	0	0	0
sp|O15397|IPO8_HUMAN	sp|O15397|IPO8_HUMAN				0	0	0	0	0	0	0	0	0	0	0	0	0	0	0	0	0	0	0	0	1168800	0	1157600	0	0	0	0	0	0	0	0	0	0	0	0	0	0	0	0	0	0	0	0	0	0
sp|O15400|STX7_HUMAN	sp|O15400|STX7_HUMAN				0	0	0	0	0	0	0	0	0	0	0	0	0	0	0	0	0	0	0	0	0	0	0	0	0	0	0	0	0	0	0	0	0	0	0	0	0	0	0	0	0	0	0	0	0
sp|O15440|MRP5_HUMAN;sp|Q5T3U5|MRP7_HUMAN;sp|Q92887|MRP2_HUMAN	sp|O15440|MRP5_HUMAN				0	0	1345900	0	0	0	4756600	7524200	0	0	0	0	0	0	14725000	4887300	20595000	3287000	5061600	23428000	1667400	0	0	0	0	0	0	0	14143000	0	0	5452300	0	0	0	0	0	0	0	0	0	0	0	12257000	0
sp|O15479|MAGB2_HUMAN	sp|O15479|MAGB2_HUMAN				0	0	0	0	0	0	0	0	0	0	0	0	0	0	0	0	0	0	0	0	0	0	0	0	0	0	0	0	0	0	0	0	8165400	4477700	0	4592200	0	0	0	0	0	0	0	0	3754500
sp|O15498|YKT6_HUMAN	sp|O15498|YKT6_HUMAN				429720000	122180000	878040000	652500000	723780000	1179100000	697330000	862310000	693660000	207540000	307380000	1177600000	297510000	254430000	495980000	488160000	655630000	671170000	490140000	482170000	512040000	502920000	1066800000	265350000	519640000	899520000	471590000	1178900000	823940000	1111800000	1043900000	540560000	857120000	750740000	362550000	547210000	693300000	168270000	665290000	384650000	1089100000	669110000	366410000	923410000	697790000
sp|O15541|R113A_HUMAN	sp|O15541|R113A_HUMAN	+			0	0	0	0	0	0	0	0	0	0	0	0	0	0	0	0	0	0	0	0	0	0	0	0	0	0	0	0	0	0	0	0	0	0	0	0	0	0	0	0	0	0	0	0	0
sp|O43143|DHX15_HUMAN	sp|O43143|DHX15_HUMAN				3362800	0	18370000	46245000	14523000	0	2364200	993760	0	0	0	0	1176800	3845500	904800	22716000	2595900	9995400	0	3842900	0	14748000	0	1964100	0	12648000	0	0	35114000	0	0	0	131860000	14422000	0	91555000	57807000	0	8850100	1056900	6621700	29832000	0	14914000	6110200
sp|O43166|SI1L1_HUMAN	sp|O43166|SI1L1_HUMAN				0	0	0	0	0	0	0	0	0	0	0	0	0	0	0	0	0	0	0	0	0	0	0	0	0	0	0	0	0	0	0	0	0	0	0	0	0	0	0	0	0	0	0	0	0
sp|O43169|CYB5B_HUMAN	sp|O43169|CYB5B_HUMAN				0	0	14756000	29795000	27625000	9699300	30024000	16593000	23709000	6628900	15459000	12028000	9088800	0	12355000	17980000	30740000	23113000	14767000	30809000	17404000	39826000	10241000	0	49528000	0	15137000	8951800	0	30316000	0	26133000	10029000	0	11756000	21093000	0	16862000	5521000	0	28779000	0	0	26989000	0
sp|O43175|SERA_HUMAN	sp|O43175|SERA_HUMAN				10984000	43396000	0	0	3320600	0	0	2456700	8086500	0	4618300	0	20171000	9081700	4156200	0	30905000	5551800	3298200	7255700	2794500	0	1439800	10020000	5415000	5388900	4810800	0	7026100	0	0	0	0	0	0	0	0	4815500	6375100	26358000	4386600	3330400	0	0	4051700
sp|O43237|DC1L2_HUMAN	sp|O43237|DC1L2_HUMAN				0	0	0	0	0	0	0	0	0	0	0	0	0	0	798180	0	0	0	0	2186400	0	0	0	0	0	0	0	0	0	0	0	0	0	0	0	0	0	0	0	0	1263500	0	0	0	0
sp|O43242|PSMD3_HUMAN	sp|O43242|PSMD3_HUMAN				0	0	0	0	0	0	0	0	0	0	0	0	0	0	0	0	0	0	0	0	0	0	0	0	0	0	0	0	0	0	0	0	0	0	0	0	0	0	0	0	0	0	0	0	0
sp|O43264|ZW10_HUMAN	sp|O43264|ZW10_HUMAN				0	0	0	0	0	0	0	0	0	0	0	0	0	0	0	160890	0	0	0	0	0	0	0	0	0	0	0	0	0	0	0	0	28273000	0	656210000	0	0	0	0	0	0	0	0	0	0
sp|O43290|SNUT1_HUMAN	sp|O43290|SNUT1_HUMAN				0	0	0	0	0	0	0	0	0	0	0	0	2735100	0	0	0	0	0	0	0	2739400	0	0	8049300	0	2489500	0	0	738280	0	0	10985000	9736900	9642600	0	0	0	0	0	0	0	0	0	0	36905000
sp|O43296|ZN264_HUMAN;sp|Q08ER8|ZN543_HUMAN;sp|Q5CZA5|ZN805_HUMAN	sp|O43296|ZN264_HUMAN;sp|Q08ER8|ZN543_HUMAN;sp|Q5CZA5|ZN805_HUMAN	+			0	0	0	0	0	0	0	0	0	0	0	0	0	0	0	0	0	0	0	0	0	0	0	0	0	0	0	0	0	0	0	0	0	0	0	0	0	0	0	0	0	0	0	0	0
sp|O43303|CP110_HUMAN	sp|O43303|CP110_HUMAN				0	0	0	0	0	3716600	0	0	0	0	0	0	0	0	0	0	0	0	0	0	0	0	0	0	0	0	0	0	0	0	0	0	0	0	6370000	0	0	0	0	0	0	0	0	0	0
sp|O43314|VIP2_HUMAN	sp|O43314|VIP2_HUMAN				0	0	0	0	0	0	0	0	0	0	0	0	0	0	0	0	0	0	0	0	0	0	0	0	0	0	0	0	0	0	0	0	0	0	0	0	0	0	0	0	0	0	0	0	0
sp|O43353|RIPK2_HUMAN	sp|O43353|RIPK2_HUMAN				0	0	0	0	0	0	0	0	0	0	0	0	0	0	0	0	0	0	0	0	0	0	0	0	0	0	0	0	0	0	0	0	0	0	0	0	0	0	0	0	0	0	0	0	0
sp|O43379|WDR62_HUMAN	sp|O43379|WDR62_HUMAN				0	0	0	0	0	0	0	0	0	0	0	0	0	0	0	0	0	0	0	0	4033500	0	0	15647000	0	0	0	0	0	0	0	0	0	0	0	0	0	0	0	0	0	0	0	0	0
sp|O43390|HNRPR_HUMAN	sp|O43390|HNRPR_HUMAN				0	0	0	0	0	0	0	0	0	0	0	0	0	0	0	0	0	0	0	0	0	0	0	0	0	0	0	0	0	0	0	0	0	0	0	0	0	0	0	0	0	0	0	0	0
sp|O43395|PRPF3_HUMAN	sp|O43395|PRPF3_HUMAN				58885000	0	0	0	0	0	0	0	0	0	0	0	0	0	0	0	0	0	0	0	0	0	0	0	0	0	0	0	0	0	0	0	0	0	0	0	0	0	0	0	0	0	0	0	0
sp|O43396|TXNL1_HUMAN	sp|O43396|TXNL1_HUMAN				0	0	22029000	2599600	11359000	29472000	11354000	20834000	19343000	3744700	9604900	26971000	3193800	0	32185000	0	9287800	0	14166000	13405000	27148000	19124000	48538000	31773000	22004000	11007000	0	14989000	4915700	8022900	0	0	0	0	8884500	0	0	0	0	1877000	13284000	6814700	3272600	6228800	0
sp|O43399|TPD54_HUMAN	sp|O43399|TPD54_HUMAN				0	0	0	903650	6914700	0	0	8682800	1727000	1503200	4473900	0	0	0	0	0	0	0	2316000	0	0	0	0	0	0	0	0	3475900	0	2637300	0	0	0	0	5676500	0	0	0	0	3006400	0	9587600	7291400	0	0
sp|O43402|EMC8_HUMAN	sp|O43402|EMC8_HUMAN				6001900	5833500	0	0	0	1956600	0	0	0	0	0	0	0	0	0	0	0	0	0	0	0	0	0	0	0	0	0	0	0	0	0	0	0	0	0	0	0	0	0	0	0	0	0	0	0
sp|O43426|SYNJ1_HUMAN	sp|O43426|SYNJ1_HUMAN				0	0	22851000	6114300	3233800	41290000	55836000	39507000	0	0	0	2874700	0	0	6289800	2791100	8192500	5630000	43247000	34227000	17648000	6048700	10509000	24604000	8238600	1590200	3490600	6055400	45303000	0	0	23771000	0	0	1809700	0	0	0	0	0	52643000	0	0	124330000	0
sp|O43432|IF4G3_HUMAN	sp|O43432|IF4G3_HUMAN				0	0	0	0	0	2552900	10385000	8967900	2696200	28252000	23462000	0	0	0	3954600	0	10777000	0	7379500	3474700	18465000	0	4146800	8915700	0	2636400	0	0	4039700	3852800	0	1550300	0	0	0	0	0	0	0	0	2976400	0	0	0	0
sp|O43491|E41L2_HUMAN	sp|O43491|E41L2_HUMAN				274310000	224780000	78467000	125220000	199910000	149700000	227080000	329520000	65375000	2990900	13079000	97286000	62376000	14065000	328070000	217720000	432600000	252750000	383660000	320770000	241170000	74951000	236960000	238220000	69232000	162700000	188050000	67483000	184090000	339910000	59954000	272160000	6306000	0	35992000	30358000	0	0	31216000	9241000	84150000	102900000	3672500	264490000	5185700
sp|O43493|TGON2_HUMAN	sp|O43493|TGON2_HUMAN				0	0	0	0	0	0	0	0	0	0	0	0	0	0	0	0	0	0	0	0	0	0	520710	0	0	0	0	0	0	0	0	0	0	0	266970	0	0	0	0	0	0	0	0	0	0
sp|O43572|AKA10_HUMAN	sp|O43572|AKA10_HUMAN				0	0	0	0	0	0	0	0	0	0	0	0	0	0	0	0	0	0	0	0	40599000	77826000	61005000	0	0	0	48861000	58784000	47479000	0	0	0	0	0	0	0	0	0	50630000	8050600	80157000	0	0	0	0
sp|O43592|XPOT_HUMAN	sp|O43592|XPOT_HUMAN				844240	0	2099900	2474100	1708900	0	0	3981100	0	1538000	0	0	8070000	2608300	1203300	16000000	3529700	4217300	0	3656700	673360	0	0	0	0	4362400	0	0	3145600	0	0	2346100	2503000	0	0	0	0	0	4298700	0	1557300	6316600	0	3128700	2498900
sp|O43615|TIM44_HUMAN	sp|O43615|TIM44_HUMAN				0	0	0	0	0	0	0	0	0	0	0	0	0	0	0	0	0	0	0	0	23157000	10003000	25898000	141560000	377870000	157810000	0	0	0	0	0	0	0	0	0	0	0	0	0	0	0	0	0	0	0
sp|O43639|NCK2_HUMAN	sp|O43639|NCK2_HUMAN				0	0	0	0	0	0	0	0	0	0	0	0	0	0	0	0	0	0	0	0	0	0	0	0	0	0	0	0	0	0	0	0	0	0	0	0	0	0	0	0	0	0	0	0	0
sp|O43663|PRC1_HUMAN	sp|O43663|PRC1_HUMAN				5795400	14141000	0	0	0	0	0	0	0	0	0	0	0	0	0	0	0	0	0	0	0	0	0	0	0	0	0	0	0	0	0	0	0	0	0	5660300	5140700	0	0	0	0	0	0	0	0
sp|O43670|ZN207_HUMAN	sp|O43670|ZN207_HUMAN				0	0	0	0	0	0	0	0	0	0	0	0	0	0	0	0	0	0	0	0	0	0	0	0	0	0	0	0	0	0	0	0	0	0	0	0	0	0	0	0	0	0	0	0	0
sp|O43684|BUB3_HUMAN	sp|O43684|BUB3_HUMAN				5453300	0	0	3685400	0	0	0	0	0	0	0	0	0	3163300	0	0	0	0	0	0	0	0	0	4274600	0	0	0	0	0	0	0	0	0	4243100	0	5293400	0	0	0	0	0	8061200	0	0	0
sp|O43707|ACTN4_HUMAN;sp|Q08043|ACTN3_HUMAN	sp|O43707|ACTN4_HUMAN				0	0	974940	0	0	0	3181200	0	0	0	0	0	0	0	0	719690	1658200	0	0	1177900	0	0	0	0	0	0	0	0	704440	0	0	0	0	0	0	0	0	0	0	0	344810	0	0	639730	0
sp|O43719|HTSF1_HUMAN	sp|O43719|HTSF1_HUMAN				0	0	0	0	0	0	0	0	0	0	0	0	0	0	0	0	0	0	0	0	0	0	0	0	0	0	0	0	0	0	0	0	0	0	0	0	0	0	0	0	0	0	0	0	0
sp|O43734|CIKS_HUMAN	sp|O43734|CIKS_HUMAN				0	0	0	0	0	0	0	0	0	0	0	0	0	0	0	0	0	0	0	0	0	0	0	0	0	0	0	0	0	0	0	0	0	0	0	0	0	0	0	0	0	0	0	0	0
sp|O43741|AAKB2_HUMAN	sp|O43741|AAKB2_HUMAN				0	0	0	0	0	0	0	0	0	0	0	0	0	0	0	0	0	0	0	0	0	0	0	0	0	0	0	0	0	0	0	0	0	0	0	0	0	0	0	0	0	0	0	0	0
sp|O43747|AP1G1_HUMAN	sp|O43747|AP1G1_HUMAN				0	0	0	0	0	0	0	0	0	0	0	0	0	0	0	0	0	0	0	0	0	0	0	0	0	0	0	0	0	0	0	0	0	0	0	0	0	0	0	0	0	0	0	0	0
sp|O43752|STX6_HUMAN	sp|O43752|STX6_HUMAN				0	0	0	0	0	0	0	0	0	0	0	0	0	0	0	0	0	0	0	0	0	0	0	0	0	0	0	0	0	0	0	0	0	0	0	0	0	0	0	0	0	0	0	0	0
sp|O43768|ENSA_HUMAN;sp|P56211|ARP19_HUMAN	sp|O43768|ENSA_HUMAN;sp|P56211|ARP19_HUMAN				0	0	0	0	0	0	0	6061300	0	0	0	0	0	0	0	0	0	0	0	0	0	0	0	0	0	0	0	0	0	0	0	0	0	0	0	0	0	0	0	0	0	0	0	0	0
sp|O43795|MYO1B_HUMAN;sp|Q9UBC5|MYO1A_HUMAN	sp|O43795|MYO1B_HUMAN				0	0	0	0	0	0	0	0	0	0	0	0	0	0	0	0	0	0	0	0	0	0	0	0	0	0	0	0	0	0	0	0	0	0	0	0	0	0	0	0	0	0	0	0	0
sp|O43808|PM34_HUMAN	sp|O43808|PM34_HUMAN				0	0	0	0	0	0	0	0	0	0	0	0	0	0	0	0	0	0	0	0	0	0	0	0	0	0	0	0	0	0	0	0	0	0	0	0	0	0	0	0	0	0	0	0	0
sp|O43809|CPSF5_HUMAN	sp|O43809|CPSF5_HUMAN				0	0	0	0	0	0	0	0	0	0	0	0	0	0	0	0	0	0	0	0	0	0	0	0	0	0	0	0	0	0	0	0	0	0	0	0	0	0	0	0	0	0	0	0	0
sp|O43824|GTPB6_HUMAN	sp|O43824|GTPB6_HUMAN				0	0	0	0	0	0	0	0	0	0	0	0	0	0	0	0	0	0	0	0	0	0	0	0	0	0	0	0	0	0	0	0	0	0	0	0	0	0	0	0	0	0	0	0	0
sp|O43865|SAHH2_HUMAN	sp|O43865|SAHH2_HUMAN				2275700	0	0	0	0	5761300	0	1997100	0	0	0	0	0	0	0	0	0	0	0	0	0	0	0	0	0	0	0	0	0	0	0	0	0	0	0	0	0	0	0	0	0	0	0	0	0
sp|O43896|KIF1C_HUMAN	sp|O43896|KIF1C_HUMAN				0	0	0	0	0	0	484370	0	0	0	2457800	0	0	0	907410	0	0	0	0	551670	2241400	0	0	2468100	0	0	0	0	0	0	0	2381600	0	0	0	0	0	0	0	0	0	0	0	0	0
sp|O43913|ORC5_HUMAN	sp|O43913|ORC5_HUMAN				0	0	0	0	0	0	0	0	0	0	0	0	0	0	0	0	0	0	0	0	0	0	0	0	0	0	0	0	0	0	0	0	0	0	0	0	0	0	0	0	0	0	0	0	0
sp|O43933|PEX1_HUMAN	sp|O43933|PEX1_HUMAN				0	0	16458000	19761000	49631000	34406000	31248000	55467000	0	2441600	24248000	12604000	15012000	9759600	21653000	32030000	20785000	31468000	25439000	25405000	48224000	27188000	0	29158000	13713000	16419000	42467000	53223000	48755000	58841000	60264000	51619000	6425400	0	68822000	0	0	0	54415000	55387000	61719000	45393000	23808000	49174000	0
sp|O60229|KALRN_HUMAN	sp|O60229|KALRN_HUMAN				0	0	12534000	0	0	0	0	0	0	0	0	0	0	0	0	0	0	5753400	0	0	0	0	0	0	0	0	0	0	0	0	0	0	0	0	0	0	0	0	0	0	0	0	0	5036800	0
sp|O60231|DHX16_HUMAN	sp|O60231|DHX16_HUMAN				0	0	2625800	6867200	0	2483400	0	1858100	0	0	0	0	0	0	0	0	0	0	0	0	0	0	0	2121500	0	0	0	0	1464000	0	0	1850200	0	0	0	0	0	1958500	0	1238100	1020500	0	2053300	1084500	0
sp|O60238|BNI3L_HUMAN	sp|O60238|BNI3L_HUMAN				0	0	0	0	0	0	0	0	0	0	0	6718100	0	0	0	0	0	0	0	0	0	0	0	0	0	0	0	0	0	0	0	0	0	0	0	0	0	0	0	0	0	0	7415700	5850000	0
sp|O60239|3BP5_HUMAN	sp|O60239|3BP5_HUMAN				0	0	0	0	0	0	0	0	0	0	0	0	0	0	0	0	0	0	0	0	0	0	0	0	0	0	0	0	0	16388000	15395000	0	0	0	0	0	0	0	0	0	0	0	0	0	0
sp|O60244|MED14_HUMAN	sp|O60244|MED14_HUMAN				0	0	0	0	0	0	0	0	0	0	0	0	0	0	0	0	0	0	0	0	0	0	0	0	0	0	0	0	0	0	0	0	0	0	0	0	0	0	0	0	0	0	0	0	0
sp|O60245|PCDH7_HUMAN	sp|O60245|PCDH7_HUMAN				0	0	0	0	0	0	0	0	0	0	0	0	0	0	0	0	0	0	0	0	0	0	0	0	0	0	0	0	0	0	0	0	0	0	0	0	0	0	0	0	0	0	0	0	0
sp|O60264|SMCA5_HUMAN	sp|O60264|SMCA5_HUMAN				0	0	0	0	0	0	0	0	0	0	0	0	0	0	0	0	0	0	0	0	0	0	0	0	0	0	0	0	0	0	0	0	0	0	0	0	0	0	0	0	0	0	0	0	0
sp|O60271|JIP4_HUMAN;sp|Q9UPT6|JIP3_HUMAN	sp|O60271|JIP4_HUMAN				16041000	8652000	12221000	0	8312100	0	0	12131000	0	0	0	0	0	0	2771500	25615000	0	6372300	0	4138700	55026000	136760000	66609000	9146500	21305000	7909300	5370800	5259400	2089800	0	8271500	0	0	0	16996000	0	0	0	0	6237200	3239600	3696600	1206700	1210300	0
sp|O60281|ZN292_HUMAN	sp|O60281|ZN292_HUMAN				0	0	0	0	0	0	0	0	0	0	0	0	0	0	0	0	0	0	0	0	0	0	0	0	0	0	0	0	0	0	0	0	0	0	0	0	0	0	0	0	0	0	0	0	0
sp|O60285|NUAK1_HUMAN	sp|O60285|NUAK1_HUMAN	+			0	0	0	0	0	0	0	0	0	0	0	0	0	0	0	0	0	0	0	0	0	0	0	0	0	0	0	0	0	0	0	0	0	0	0	0	0	0	0	0	0	0	0	0	0
sp|O60308|CE104_HUMAN	sp|O60308|CE104_HUMAN				0	0	0	0	0	0	0	0	0	0	0	0	0	0	798800	1886800	2373600	0	0	0	0	0	0	0	0	0	0	0	0	0	0	0	0	0	0	0	0	0	0	0	0	0	0	0	0
sp|O60313|OPA1_HUMAN	sp|O60313|OPA1_HUMAN				4365100	0	0	0	0	0	0	0	0	0	0	0	0	0	0	0	0	0	0	0	0	0	0	0	0	0	0	0	0	0	0	0	0	0	0	0	0	0	0	0	0	0	0	0	0
sp|O60318|GANP_HUMAN	sp|O60318|GANP_HUMAN				0	0	0	0	0	0	0	0	0	0	0	0	0	0	0	0	0	0	0	0	0	0	0	0	0	0	0	0	0	0	0	0	0	0	0	0	0	0	0	0	0	0	0	0	0
sp|O60331|PI51C_HUMAN	sp|O60331|PI51C_HUMAN	+			0	0	0	0	0	0	0	0	0	0	0	0	0	0	0	0	0	0	0	0	0	0	0	0	0	0	0	0	0	0	0	0	0	0	0	0	0	0	0	0	0	0	0	0	0
sp|O60333|KIF1B_HUMAN	sp|O60333|KIF1B_HUMAN				0	0	0	0	0	0	0	0	0	0	0	0	0	0	0	0	0	0	0	0	0	0	0	0	0	0	0	0	0	0	0	0	0	0	0	0	0	0	0	0	0	0	0	320090	0
sp|O60343|TBCD4_HUMAN	sp|O60343|TBCD4_HUMAN				0	0	0	1509700	3274800	1980700	0	0	8327300	2926900	17002000	0	0	0	0	0	5999800	1302600	3662100	4146100	44598000	7769300	10276000	11873000	7984000	709290	46722000	12274000	133800000	4620700	0	2942800	0	0	0	0	0	0	1157000	0	0	0	0	1044100	0
sp|O60347|TBC12_HUMAN;sp|Q9P2M4|TBC14_HUMAN	sp|O60347|TBC12_HUMAN				0	0	0	0	0	0	0	0	0	0	0	0	0	0	0	0	0	0	0	0	0	0	0	0	0	0	3033300	7004700	18998000	0	0	0	0	0	0	0	0	0	0	0	0	0	0	0	0
sp|O60447|EVI5_HUMAN	sp|O60447|EVI5_HUMAN				0	0	0	0	0	0	0	0	0	0	0	0	0	0	0	0	0	0	0	0	89424000	280900000	88190000	0	0	0	116750000	97216000	118500000	0	0	0	0	0	0	0	0	0	0	0	0	0	0	0	0
sp|O60488|ACSL4_HUMAN	sp|O60488|ACSL4_HUMAN				0	0	0	5122200	0	0	5562400	0	0	0	0	0	2299200	0	1667800	1990600	3903900	0	0	7027600	0	0	0	0	0	0	3205300	3869800	0	7870600	6822800	0	0	0	4592000	0	0	2328000	0	0	2438400	0	0	13611000	0
sp|O60493|SNX3_HUMAN	sp|O60493|SNX3_HUMAN				0	0	0	0	0	0	0	3783600	0	0	0	0	0	0	0	0	1215700	0	0	872380	0	0	0	0	0	0	0	0	0	0	0	0	0	0	0	0	0	0	0	0	0	0	0	0	0
sp|O60499|STX10_HUMAN	sp|O60499|STX10_HUMAN				0	0	0	0	0	3910500	0	0	0	0	0	0	0	0	0	0	0	0	0	0	0	0	0	0	0	0	0	0	0	0	0	0	0	0	0	0	0	0	0	0	0	0	0	0	0
sp|O60502|OGA_HUMAN	sp|O60502|OGA_HUMAN				0	0	0	0	0	0	0	0	0	0	0	0	0	0	0	4188300	0	0	0	0	0	0	0	6039800	8580200	0	0	0	0	0	0	0	0	0	0	0	0	0	0	0	0	0	0	0	0
sp|O60503|ADCY9_HUMAN	sp|O60503|ADCY9_HUMAN				0	0	0	0	0	0	0	0	0	0	0	0	0	0	0	0	0	0	0	0	0	0	0	0	0	0	0	0	0	0	0	0	0	0	0	0	0	0	0	0	0	0	0	0	0
sp|O60506|HNRPQ_HUMAN	sp|O60506|HNRPQ_HUMAN				0	0	0	0	0	0	0	0	0	0	0	0	0	0	0	0	0	0	0	0	0	0	0	246290	0	0	0	0	0	0	0	0	0	0	0	0	0	0	0	0	0	0	0	0	0
sp|O60518|RNBP6_HUMAN	sp|O60518|RNBP6_HUMAN				0	0	0	0	0	0	0	0	0	0	0	0	0	0	0	0	0	1502500	0	0	0	0	0	0	0	0	0	0	0	0	0	0	0	0	0	0	0	0	0	0	0	0	0	0	0
sp|O60524|NEMF_HUMAN	sp|O60524|NEMF_HUMAN				0	0	0	0	0	0	0	0	0	0	0	0	0	0	0	0	0	0	0	0	3865800	0	0	0	0	0	0	0	0	0	0	0	0	0	0	0	0	0	0	0	0	0	0	0	0
sp|O60563|CCNT1_HUMAN	sp|O60563|CCNT1_HUMAN				0	0	0	0	0	0	0	0	0	0	0	0	0	0	0	0	0	0	0	0	0	0	0	0	0	0	0	0	0	0	0	0	0	0	0	0	0	0	0	0	0	0	0	0	0
sp|O60566|BUB1B_HUMAN	sp|O60566|BUB1B_HUMAN				0	0	13020000	1117800	15838000	2726100	12092000	30676000	0	0	0	0	0	0	18031000	15023000	5795100	4686600	6972500	2159100	41507000	5848800	3767500	32501000	21448000	4706100	0	0	17959000	4160400	0	8512600	0	0	3025200	0	0	0	0	0	29360000	0	0	10119000	0
sp|O60610|DIAP1_HUMAN	sp|O60610|DIAP1_HUMAN				0	0	0	0	0	0	0	0	0	0	0	0	0	0	0	0	0	0	0	7704100	3296600	0	0	4274500	0	0	0	0	0	0	0	0	0	0	0	0	0	0	0	0	0	0	0	0	0
sp|O60645|EXOC3_HUMAN	sp|O60645|EXOC3_HUMAN				3872200	0	0	0	0	7506800	18072000	4896600	0	0	0	0	0	0	4680500	0	3688800	1172400	0	0	94425000	418560000	270240000	0	0	0	78731000	84795000	35051000	6041900	0	0	0	0	0	0	0	0	0	0	1100000	0	0	1941000	0
sp|O60664|PLIN3_HUMAN	sp|O60664|PLIN3_HUMAN				0	0	0	0	0	0	0	0	0	0	2221800	0	1816100	3071900	0	0	0	0	0	0	0	0	0	0	0	0	0	0	0	0	0	0	0	0	7713500	0	0	0	0	6625500	0	0	11544000	0	0
sp|O60684|IMA7_HUMAN;sp|O15131|IMA6_HUMAN	sp|O60684|IMA7_HUMAN				0	0	0	0	0	0	0	0	0	0	0	0	0	0	0	0	0	0	0	0	0	0	0	0	0	0	0	0	0	0	0	0	0	0	0	0	0	0	0	0	0	0	0	0	0
sp|O60716|CTND1_HUMAN	sp|O60716|CTND1_HUMAN				0	0	3034300	12983000	1995700	10830000	31979000	26250000	0	0	0	0	2943300	0	46788000	44913000	70641000	7379800	43663000	23070000	5178200	1391400	6066600	1442500	0	0	3672400	0	40261000	40309000	0	22555000	0	0	726500	0	0	0	4738200	0	21572000	11161000	0	63882000	0
sp|O60749|SNX2_HUMAN	sp|O60749|SNX2_HUMAN				2126700	6115200	3680800	0	0	0	4707300	4570600	0	0	0	0	0	0	7794300	0	0	0	0	6612700	0	0	0	3213100	0	0	0	0	0	3233500	3359400	0	0	0	0	0	0	0	0	0	2808400	3151100	0	4477400	0
sp|O60762|DPM1_HUMAN	sp|O60762|DPM1_HUMAN				0	0	0	0	0	0	0	0	3435700	0	0	0	2884000	0	0	12865000	0	11699000	2861300	0	0	0	1856600	0	0	0	0	0	2590700	0	0	0	9543400	11196000	0	5198500	0	0	0	0	0	0	0	0	8552300
sp|O60763|USO1_HUMAN;REV__sp|Q5VZ89|DEN4C_HUMAN	sp|O60763|USO1_HUMAN				0	0	1603800	0	0	0	0	2762400	0	0	0	0	0	0	1434800	3990800	0	0	0	0	3397100	0	0	1471500	0	0	0	0	2614200	0	0	937880	0	0	1632300	0	0	0	30115000	72645000	48432000	1734100	64688000	0	0
sp|O60784|TOM1_HUMAN	sp|O60784|TOM1_HUMAN				0	0	0	0	0	0	0	450250	0	0	0	0	0	0	288690	0	0	0	0	0	93360	0	787570	65207	0	190340	0	0	0	0	0	0	0	0	0	0	0	0	0	0	0	0	0	0	0
sp|O60831|PRAF2_HUMAN	sp|O60831|PRAF2_HUMAN				8795100	7559800	0	0	0	0	0	0	0	0	0	0	0	0	0	0	2520900	0	0	0	0	0	0	0	0	0	0	0	0	0	0	0	0	0	0	0	0	0	0	0	0	0	0	0	4094700
sp|O60841|IF2P_HUMAN	sp|O60841|IF2P_HUMAN				821180000	156960000	50960000	72983000	67362000	38553000	74071000	47108000	35950000	100250000	18633000	125450000	43354000	98654000	77320000	214900000	28881000	186530000	82215000	43098000	66761000	8180700	2952000	157840000	106530000	73638000	7547200	0	85783000	0	0	71480000	99053000	504720000	10472000	312800000	281200000	26796000	48545000	21260000	20653000	69193000	6940300	171380000	226470000
sp|O60858|TRI13_HUMAN	sp|O60858|TRI13_HUMAN				0	0	0	0	0	0	0	0	0	0	0	0	0	0	0	0	0	0	0	0	0	0	0	0	0	0	0	0	0	0	0	0	0	0	0	0	0	0	0	0	0	0	0	0	0
sp|O60879|DIAP2_HUMAN	sp|O60879|DIAP2_HUMAN				0	0	9124900	25993000	0	13794000	13138000	18262000	0	7598500	2772500	0	0	0	5593300	0	0	0	1219600	0	17441000	64096000	8129900	0	0	0	0	0	0	0	0	0	0	0	0	0	0	0	0	0	6068500	0	0	0	0
sp|O60880|SH21A_HUMAN	sp|O60880|SH21A_HUMAN				0	0	0	0	0	0	0	0	0	0	0	0	0	0	0	0	0	0	0	0	0	0	0	0	0	0	0	0	0	0	0	0	0	0	0	0	0	0	0	0	0	0	0	0	0
sp|O60884|DNJA2_HUMAN	sp|O60884|DNJA2_HUMAN				0	0	0	0	0	0	0	3644200	0	0	0	0	0	1659200	0	0	0	0	0	0	0	0	4753700	1418700	4693400	0	0	0	0	0	0	0	0	0	4887700	0	0	6365900	0	1619800	0	0	1748700	0	0
sp|O60885|BRD4_HUMAN;sp|Q58F21|BRDT_HUMAN	sp|O60885|BRD4_HUMAN				0	0	0	0	0	0	9468800	0	0	0	0	14582000	0	0	0	0	0	0	0	0	6239000	0	0	949270	0	0	0	0	0	0	0	0	0	0	0	0	0	0	0	0	0	0	0	0	0
sp|O60890|OPHN1_HUMAN	sp|O60890|OPHN1_HUMAN				0	0	0	0	0	0	0	0	0	0	0	0	0	0	0	0	0	0	0	0	4703300	73416000	2953100	0	0	0	0	0	0	0	0	0	0	0	0	0	0	0	0	0	0	0	0	0	0
sp|O75044|SRGP2_HUMAN;sp|P0DMP2|SRG2B_HUMAN;sp|P0DJJ0|SRG2C_HUMAN	sp|O75044|SRGP2_HUMAN;sp|P0DMP2|SRG2B_HUMAN;sp|P0DJJ0|SRG2C_HUMAN				0	0	0	0	0	0	0	0	0	0	0	0	0	0	0	0	0	0	0	0	2648500	0	0	0	0	0	0	0	0	0	0	0	0	0	0	0	0	0	0	0	0	0	0	0	0
sp|O75052|CAPON_HUMAN	sp|O75052|CAPON_HUMAN				0	0	0	0	0	0	0	0	0	4962600	0	0	0	3660700	0	0	0	0	0	0	0	0	0	0	0	0	0	0	0	0	0	0	0	0	0	0	0	0	0	0	0	0	0	0	0
sp|O75061|AUXI_HUMAN	sp|O75061|AUXI_HUMAN				0	0	0	0	0	0	0	882240	0	0	0	0	0	0	687650	0	0	0	0	752940	755130	0	548850	0	0	0	0	0	653040	0	0	0	0	0	0	0	0	0	0	0	0	0	0	0	0
sp|O75064|DEN4B_HUMAN	sp|O75064|DEN4B_HUMAN				0	0	0	0	0	0	0	0	0	0	0	0	0	0	0	0	0	0	0	0	0	0	0	0	0	0	0	0	7572000	0	0	0	0	0	0	0	0	0	0	0	0	0	0	0	0
sp|O75113|N4BP1_HUMAN	sp|O75113|N4BP1_HUMAN				0	0	0	0	0	31250000	18090000	51099000	0	0	0	15968000	3084300	9074400	0	0	0	0	17323000	31956000	44119000	3841900	7404300	23803000	34720000	12015000	9242700	0	19640000	13420000	0	25444000	0	0	8213900	0	0	3435300	0	0	26921000	0	1677400	8413100	0
sp|O75116|ROCK2_HUMAN	sp|O75116|ROCK2_HUMAN				0	0	0	0	1519400	1114100	4909300	19801000	0	0	14428000	0	0	0	1730800	0	0	0	2820400	8242300	27967000	0	0	7112700	0	0	0	0	0	0	0	4349000	0	0	1692900	0	0	0	0	0	746160	927360	0	57291000	0
sp|O75122|CLAP2_HUMAN	sp|O75122|CLAP2_HUMAN				0	0	0	0	0	0	0	0	0	0	0	0	0	0	0	0	0	0	0	0	26471000	4259900	15031000	0	0	0	0	0	0	0	0	0	0	0	0	0	0	0	0	0	15247000	0	0	1542300	0
sp|O75131|CPNE3_HUMAN;sp|Q96FN4|CPNE2_HUMAN;sp|Q96A23|CPNE4_HUMAN;sp|O95741|CPNE6_HUMAN;sp|Q9UBL6|CPNE7_HUMAN	sp|O75131|CPNE3_HUMAN				0	0	0	0	0	0	0	0	0	0	0	0	0	0	0	0	0	0	0	0	0	0	0	0	0	0	0	0	0	0	0	0	0	0	0	0	0	0	0	0	0	0	0	0	0
sp|O75132|ZBED4_HUMAN	sp|O75132|ZBED4_HUMAN				0	0	0	0	0	0	0	0	0	0	0	0	0	0	0	0	0	0	0	0	0	0	0	0	0	0	0	0	554390	0	0	0	0	0	0	0	0	0	0	0	0	0	0	0	0
sp|O75143|ATG13_HUMAN	sp|O75143|ATG13_HUMAN				0	0	0	0	0	0	0	0	0	0	0	0	0	0	0	0	0	0	0	0	0	0	0	0	0	0	0	0	0	0	0	0	0	0	0	0	0	0	0	0	0	0	0	0	0
sp|O75146|HIP1R_HUMAN	sp|O75146|HIP1R_HUMAN				0	0	0	0	0	0	0	0	0	0	0	0	0	0	0	0	0	0	0	0	0	0	0	0	0	0	0	0	0	0	0	0	0	0	0	0	0	0	0	0	0	0	0	0	0
sp|O75147|OBSL1_HUMAN	sp|O75147|OBSL1_HUMAN				0	0	0	0	0	0	0	0	0	0	0	0	0	0	0	0	0	0	0	0	0	0	0	0	2110300	0	0	0	0	0	0	0	0	0	0	0	0	0	0	3164200	0	0	0	0	0
sp|O75150|BRE1B_HUMAN;sp|Q5VTR2|BRE1A_HUMAN	sp|O75150|BRE1B_HUMAN				0	0	0	0	0	0	0	0	0	0	0	0	0	0	0	0	0	0	0	0	0	0	0	0	0	0	0	0	0	0	0	0	0	0	0	0	0	0	0	0	0	0	0	0	0
sp|O75151|PHF2_HUMAN	sp|O75151|PHF2_HUMAN				0	0	0	0	0	0	0	0	0	0	0	0	0	0	0	0	0	0	0	0	0	0	0	0	0	0	0	0	0	0	0	0	0	0	0	0	0	0	0	0	0	0	0	0	0
sp|O75152|ZC11A_HUMAN	sp|O75152|ZC11A_HUMAN				0	0	0	2328900	0	2585200	5716700	1505500	0	0	0	0	0	0	0	0	1499800	0	0	1172300	27111000	3051100	5013900	13926000	1054600	1734300	0	0	1880900	0	0	3537300	0	0	1263900	0	0	0	0	0	1771200	0	0	2166600	0
sp|O75153|CLU_HUMAN	sp|O75153|CLU_HUMAN				0	0	0	0	0	0	0	0	0	0	0	0	0	0	0	0	0	0	2623900	0	0	0	0	7148800	0	0	0	0	0	0	0	0	0	0	0	0	0	0	0	0	0	0	0	0	0
sp|O75155|CAND2_HUMAN	sp|O75155|CAND2_HUMAN				0	0	0	0	0	0	0	198800	0	0	0	0	0	0	0	0	0	0	0	0	0	0	0	0	0	0	0	0	0	0	0	0	0	0	0	0	0	0	0	0	0	0	0	0	0
sp|O75165|DJC13_HUMAN	sp|O75165|DJC13_HUMAN				0	0	0	0	0	0	0	471260	0	0	0	0	0	0	0	0	0	0	0	0	515510	0	0	1469800	0	0	0	0	1874400	0	0	0	0	0	0	0	0	0	0	0	0	0	0	0	0
sp|O75170|PP6R2_HUMAN	sp|O75170|PP6R2_HUMAN				0	0	0	0	0	0	0	0	0	0	0	0	0	0	0	0	0	0	0	0	0	926340	0	0	0	0	0	0	0	0	0	0	0	0	0	0	0	0	0	0	0	0	0	0	0
sp|O75179|ANR17_HUMAN	sp|O75179|ANR17_HUMAN				7888200	0	59655000	77277000	52782000	61139000	105010000	33594000	90900000	60511000	21171000	17222000	0	0	57349000	22395000	80109000	19120000	35635000	44549000	52449000	20356000	35145000	23758000	16458000	27270000	12864000	5760700	58469000	33511000	0	23093000	0	2150900	7558400	0	0	0	7815600	0	57083000	3001800	0	105150000	0
sp|O75182|SIN3B_HUMAN	sp|O75182|SIN3B_HUMAN				0	0	0	0	0	0	0	0	0	0	0	0	0	0	0	0	0	0	0	0	0	0	0	2754400	0	0	0	0	0	0	0	0	0	0	0	0	0	0	0	0	0	0	0	0	0
sp|O75190|DNJB6_HUMAN;sp|Q8WWF6|DNJB3_HUMAN;sp|Q8NHS0|DNJB8_HUMAN;sp|Q7Z6W7|DNJB7_HUMAN;sp|P25686|DNJB2_HUMAN	sp|O75190|DNJB6_HUMAN				4513500	0	0	0	0	0	0	0	4054400	1780400	2030400	0	3139000	7890500	0	4971700	0	3674400	5792800	0	0	0	0	0	0	0	0	0	0	0	0	0	0	0	8835300	0	0	0	0	0	0	0	6186400	0	16177000
sp|O75223|GGCT_HUMAN	sp|O75223|GGCT_HUMAN				0	0	0	0	0	0	0	0	0	0	0	0	0	0	0	0	0	0	0	0	0	0	0	0	0	0	0	0	0	0	0	0	0	0	0	0	0	0	0	0	0	0	0	0	0
sp|O75251|NDUS7_HUMAN	sp|O75251|NDUS7_HUMAN				0	0	0	0	0	0	0	0	0	0	0	0	0	0	0	0	986610	0	0	0	0	0	0	0	0	2658000	0	0	0	0	0	0	0	0	0	0	0	0	0	0	0	0	0	0	0
sp|O75330|HMMR_HUMAN	sp|O75330|HMMR_HUMAN				15144000	0	0	0	0	0	0	0	0	0	0	0	0	0	0	0	0	0	0	0	0	0	0	0	0	0	0	0	0	0	0	0	0	0	0	9054600	0	0	0	0	0	0	0	0	0
sp|O75334|LIPA2_HUMAN	sp|O75334|LIPA2_HUMAN	+			0	0	0	0	0	0	0	0	0	0	0	0	0	0	0	0	0	0	0	0	0	0	0	0	0	0	0	0	0	0	0	0	0	0	0	0	0	0	0	0	0	0	0	0	0
sp|O75369|FLNB_HUMAN	sp|O75369|FLNB_HUMAN				0	0	4867300	0	23415000	20047000	10421000	0	0	0	0	0	0	0	1616400	13877000	56843000	12344000	7206100	21955000	46411000	3902900	19051000	135800000	42258000	16334000	0	0	17615000	910060	0	4349600	0	0	1206900	0	0	0	0	0	0	0	0	3648100	0
sp|O75376|NCOR1_HUMAN;sp|Q9H4R4|CT191_HUMAN	sp|O75376|NCOR1_HUMAN				0	0	0	5415400	0	13995000	5465500	8399300	0	0	0	0	0	0	0	0	0	0	0	0	2937500	0	0	2148900	0	0	0	0	763180	0	0	0	0	0	0	0	0	0	0	0	0	0	0	2125600	0
sp|O75379|VAMP4_HUMAN	sp|O75379|VAMP4_HUMAN				0	7799700	0	0	0	0	0	0	4074900	0	5445000	2814200	0	0	0	0	5055300	0	0	0	0	0	0	0	0	0	0	0	0	0	0	0	0	0	0	0	0	0	0	0	0	0	0	0	0
sp|O75381|PEX14_HUMAN	sp|O75381|PEX14_HUMAN				125760000	230610000	7343800	3957800	16917000	0	7722000	35330000	19553000	32050000	55732000	20284000	50584000	72435000	0	17782000	0	14293000	2697300	0	12875000	9811800	4598400	22356000	20899000	45487000	41922000	85171000	0	19656000	70198000	0	25785000	29297000	41203000	27255000	4578900	30635000	49866000	21646000	4643800	37639000	38230000	0	0
sp|O75390|CISY_HUMAN	sp|O75390|CISY_HUMAN				0	1201100	0	0	0	0	0	0	0	0	0	0	0	0	0	0	0	0	0	0	0	0	0	0	0	0	0	0	0	0	0	0	0	0	0	0	0	0	0	0	0	0	0	0	0
sp|O75396|SC22B_HUMAN	sp|O75396|SC22B_HUMAN				4521000	6679600	0	0	0	0	0	0	6700500	884000	0	4051600	0	0	0	0	1687600	0	0	0	3485400	0	4613500	4210400	0	0	0	0	0	0	0	0	0	0	7893300	0	0	0	0	0	0	0	0	0	0
sp|O75400|PR40A_HUMAN;sp|Q6NWY9|PR40B_HUMAN	sp|O75400|PR40A_HUMAN				0	178010000	14083000	63424000	64775000	8941500	34809000	12252000	7755000	112190000	32811000	42070000	186050000	171990000	34936000	130640000	5672400	198020000	41460000	22343000	17906000	0	14380000	59535000	0	60954000	0	0	49969000	0	0	42795000	216350000	365670000	38684000	22591000	360800000	158010000	16739000	67554000	12430000	77232000	66598000	3866300	129010000
sp|O75410|TACC1_HUMAN	sp|O75410|TACC1_HUMAN				0	0	51915000	34980000	0	90802000	56954000	69999000	0	27492000	0	35597000	7744400	42553000	97935000	46928000	32365000	15587000	84793000	70294000	67056000	22729000	73725000	24921000	0	0	66288000	0	81046000	77429000	0	89152000	8814100	15207000	95396000	0	0	2262500	62229000	35442000	103330000	105520000	41527000	85161000	0
sp|O75427|LRCH4_HUMAN	sp|O75427|LRCH4_HUMAN				0	0	0	0	0	2932200	13806000	0	0	0	0	0	0	2810100	0	0	0	0	0	0	0	0	0	0	0	0	0	0	0	0	0	0	0	0	0	0	0	0	0	0	0	0	0	0	0
sp|O75431|MTX2_HUMAN	sp|O75431|MTX2_HUMAN				5071200	0	0	0	0	0	0	2527200	0	1561800	977260	0	0	0	0	0	0	0	2895600	0	0	0	3564900	0	0	6282400	1873200	9944200	0	2983000	6925800	0	0	0	13882000	0	0	0	3466700	0	0	0	9086300	0	0
sp|O75496|GEMI_HUMAN	sp|O75496|GEMI_HUMAN				0	0	0	0	0	0	0	0	0	0	2149400	0	0	0	0	0	0	0	0	0	0	0	0	0	0	0	0	0	0	0	0	0	0	0	0	0	0	0	0	0	0	0	0	0	0
sp|O75533|SF3B1_HUMAN	sp|O75533|SF3B1_HUMAN				0	0	0	3988300	13119000	3963500	15473000	5215400	0	0	1430100	0	0	0	2483200	0	1234700	0	1408100	448990	3415900	5014000	2531500	1941600	0	4929300	0	0	2372900	0	0	954610	0	0	0	0	0	0	0	0	630400	0	0	2004600	0
sp|O75534|CSDE1_HUMAN	sp|O75534|CSDE1_HUMAN				42864000	5376100	90119000	97773000	86461000	109980000	142770000	78579000	0	9590100	8281800	12686000	10958000	19867000	179640000	119350000	134740000	108760000	62198000	134780000	78478000	164930000	77569000	93362000	46391000	130370000	17592000	63724000	112630000	108300000	12161000	0	32998000	6233200	2212600	3771800	0	0	14164000	0	74501000	59486000	2872900	152700000	0
sp|O75556|SG2A1_HUMAN	sp|O75556|SG2A1_HUMAN				0	0	0	0	0	0	0	0	0	0	0	0	0	0	0	0	0	0	0	0	0	0	0	0	0	22456000	0	0	0	0	0	0	0	0	0	0	0	0	0	0	0	0	0	0	0
sp|O75581|LRP6_HUMAN;sp|O75197|LRP5_HUMAN	sp|O75581|LRP6_HUMAN				0	0	0	0	0	0	0	0	0	0	0	0	0	0	0	0	0	0	0	0	0	0	0	0	0	0	0	0	701510	0	0	0	0	0	0	0	0	0	0	0	0	0	0	0	0
sp|O75592|MYCB2_HUMAN	sp|O75592|MYCB2_HUMAN				0	0	0	34662000	1107600	2491000	5188600	0	0	0	0	0	0	0	1311700	42695000	0	15901000	0	9591300	114780000	884280	3732300	292800000	5505100	42494000	0	0	9364300	0	0	42997000	0	3412100	2183700	0	13379000	0	0	0	1487600	0	0	5124700	0
sp|O75616|ERAL1_HUMAN	sp|O75616|ERAL1_HUMAN				0	0	0	0	0	0	0	0	0	0	2477600	0	7196900	10398000	0	0	0	0	0	0	0	0	0	0	0	0	0	0	0	0	0	0	0	0	0	0	0	0	0	0	0	16324000	1253900	0	5942200
sp|O75643|U520_HUMAN	sp|O75643|U520_HUMAN				20156000	0	0	6667100	0	0	0	1047400	0	0	0	0	0	0	0	2837700	2485200	0	0	0	1315400	0	0	20447000	0	0	0	0	8560700	0	0	1403300	22726000	39908000	0	40256000	1345600	0	14663000	0	0	3496100	0	0	34246000
sp|O75663|TIPRL_HUMAN	sp|O75663|TIPRL_HUMAN				54671000	11348000	36611000	30443000	42996000	109050000	61551000	95441000	26989000	15567000	26531000	42633000	30925000	0	81617000	18579000	53833000	23049000	40859000	42837000	37920000	64058000	125800000	47822000	58809000	40105000	21672000	83201000	80830000	75353000	62147000	54464000	20142000	0	116690000	1746700	0	18845000	0	68957000	79445000	22664000	81729000	88268000	9093800
sp|O75665|OFD1_HUMAN	sp|O75665|OFD1_HUMAN				0	0	0	0	0	0	0	0	0	0	0	0	0	0	0	0	0	0	0	0	0	0	0	0	0	0	0	0	0	0	0	0	0	0	0	0	0	0	0	0	7266300	0	0	0	0
sp|O75676|KS6A4_HUMAN	sp|O75676|KS6A4_HUMAN				0	0	0	0	0	0	0	0	0	0	0	0	0	0	0	0	0	0	0	0	0	0	0	0	0	0	0	0	0	0	0	0	0	0	0	0	0	0	0	0	0	0	0	0	0
sp|O75683|SURF6_HUMAN	sp|O75683|SURF6_HUMAN				0	18390000	26471000	8676000	35061000	20719000	4794700	11638000	49574000	0	86670000	45280000	268170000	245930000	5594300	0	0	0	6321400	0	7420400	1052500	6858900	15264000	10833000	0	8375400	8639600	0	4308500	0	0	46566000	28569000	33869000	123460000	40686000	155190000	4064400	220190000	0	36246000	266060000	3025300	22002000
sp|O75691|UTP20_HUMAN	sp|O75691|UTP20_HUMAN				254000000	41499000	222260000	316240000	327550000	207380000	390430000	214240000	268330000	534600000	34848000	327270000	475220000	605670000	246520000	425950000	234360000	496480000	215440000	389460000	297430000	19579000	183170000	348420000	13055000	397890000	60476000	0	764940000	11576000	0	652020000	591440000	502460000	35975000	379520000	109000000	0	319150000	50388000	120480000	507760000	21749000	166510000	226310000
sp|O75694|NU155_HUMAN	sp|O75694|NU155_HUMAN				0	0	32852000	31812000	28316000	70149000	50182000	54739000	32819000	0	3468500	29735000	0	0	33497000	44907000	76272000	34090000	5373200	33476000	54843000	34941000	4235000	13526000	15572000	5309500	5001100	0	69550000	5405600	0	6617300	2435400	0	7488000	0	0	0	15784000	0	22023000	4221600	0	59758000	0
sp|O75717|WDHD1_HUMAN	sp|O75717|WDHD1_HUMAN				0	0	0	0	0	0	0	0	0	0	0	0	0	0	0	0	0	0	0	0	34117000	0	0	0	0	0	0	0	0	0	0	0	0	0	0	0	0	0	0	0	0	0	0	9379100	0
sp|O75787|RENR_HUMAN	sp|O75787|RENR_HUMAN				0	0	0	0	0	0	0	0	0	0	0	1533900	0	0	0	0	2057700	0	0	0	0	0	0	0	0	0	0	0	0	0	0	0	0	0	0	0	0	0	0	0	0	0	0	0	0
sp|O75794|CD123_HUMAN	sp|O75794|CD123_HUMAN				0	0	0	0	0	0	0	0	0	0	0	0	0	0	0	0	0	0	0	0	0	0	0	54769	0	0	0	0	0	0	0	0	0	0	0	0	0	0	0	0	0	0	0	0	0
sp|O75821|EIF3G_HUMAN	sp|O75821|EIF3G_HUMAN				0	0	0	0	0	0	9548900	0	0	0	0	0	0	0	0	0	0	0	0	0	5415200	0	6167900	2083600	0	0	0	0	0	0	0	0	0	0	0	0	0	0	0	0	0	0	1950100	0	0
sp|O75864|PPR37_HUMAN	sp|O75864|PPR37_HUMAN				0	0	0	0	0	0	0	1419900	0	0	0	0	0	0	0	0	0	0	0	0	3712900	5120900	0	0	0	0	0	0	1313200	0	0	0	0	0	0	0	0	0	7815500	0	18801000	0	0	0	0
sp|O75886|STAM2_HUMAN	sp|O75886|STAM2_HUMAN				0	0	0	0	0	0	0	0	0	0	0	0	0	0	0	0	0	0	0	0	0	0	0	0	0	0	0	0	0	0	0	0	0	0	0	0	0	0	0	0	0	0	0	0	0
sp|O75891|AL1L1_HUMAN	sp|O75891|AL1L1_HUMAN				0	0	0	0	0	0	0	0	0	0	0	0	0	0	0	0	0	0	0	0	0	0	0	10327000	4665500	0	0	0	0	0	0	0	0	0	0	0	0	0	0	0	0	0	0	0	0
sp|O75909|CCNK_HUMAN	sp|O75909|CCNK_HUMAN				0	0	0	0	0	0	0	0	0	0	0	0	0	0	0	0	0	0	0	0	177030	0	0	217710	0	0	0	0	0	0	0	0	0	0	0	0	0	0	0	0	0	0	0	0	0
sp|O75914|PAK3_HUMAN	sp|O75914|PAK3_HUMAN				0	0	0	0	0	0	0	0	0	0	0	0	0	0	0	0	0	0	0	0	0	0	0	0	0	0	0	0	0	0	0	0	0	0	0	0	0	0	0	0	0	0	0	0	0
sp|O75915|PRAF3_HUMAN	sp|O75915|PRAF3_HUMAN				19102000	10472000	0	0	5190700	14380000	1618100	7718300	7064800	0	0	17111000	0	0	20878000	5455500	24830000	14855000	7042700	11951000	14050000	17679000	12186000	4403000	0	11996000	0	5943100	18528000	0	0	2929300	6464800	0	0	5510500	0	0	0	0	3373600	5599100	0	4885200	0
sp|O75925|PIAS1_HUMAN	sp|O75925|PIAS1_HUMAN				0	0	0	0	0	0	0	0	0	0	0	0	0	0	0	0	0	0	0	0	0	0	0	0	0	0	0	0	0	0	0	0	0	0	0	0	0	0	0	0	0	0	0	0	0
sp|O75937|DNJC8_HUMAN	sp|O75937|DNJC8_HUMAN				0	0	0	0	0	0	0	0	0	0	0	0	0	0	0	0	0	0	0	0	0	0	0	0	0	0	0	0	0	0	0	0	0	0	0	0	0	0	0	0	0	0	0	0	0
sp|O75940|SPF30_HUMAN	sp|O75940|SPF30_HUMAN				6162900	0	0	0	0	0	0	0	0	0	0	0	0	0	0	0	0	0	0	0	0	0	0	0	0	0	0	0	0	0	0	0	0	0	0	0	0	0	0	0	0	0	0	0	0
sp|O75953|DNJB5_HUMAN	sp|O75953|DNJB5_HUMAN				0	0	0	0	0	0	0	0	0	0	0	0	0	0	0	0	0	0	0	0	0	0	0	0	0	0	0	0	0	0	0	0	0	0	0	0	0	0	0	0	0	0	0	0	0
sp|O75962|TRIO_HUMAN	sp|O75962|TRIO_HUMAN				0	0	0	0	0	1375800	0	0	0	0	0	0	0	0	0	0	0	0	0	0	1913200	0	0	0	0	0	0	0	34363000	0	0	5512000	0	0	0	0	0	0	0	0	25017000	0	0	20656000	0
sp|O75976|CBPD_HUMAN	sp|O75976|CBPD_HUMAN				6663700	5210100	14455000	0	0	32617000	47566000	27245000	0	0	0	8699400	0	0	28316000	21214000	29497000	11164000	33387000	53506000	36120000	16638000	17578000	37415000	39143000	3129300	21578000	13810000	49163000	10343000	0	21153000	0	0	0	0	0	0	0	0	0	0	0	78416000	0
sp|O76003|GLRX3_HUMAN	sp|O76003|GLRX3_HUMAN				0	0	0	0	0	0	0	0	0	0	0	0	0	0	1380000	0	0	0	0	0	0	0	0	203830	0	0	0	0	0	0	0	0	0	0	0	0	0	0	0	0	0	0	0	0	0
sp|O76024|WFS1_HUMAN	sp|O76024|WFS1_HUMAN				5086400	5117000	0	0	0	0	0	0	0	0	0	0	0	0	0	1692300	1277500	0	0	0	0	0	0	0	0	0	0	0	0	0	0	0	0	0	0	0	0	0	0	0	0	0	0	0	0
sp|O76031|CLPX_HUMAN	sp|O76031|CLPX_HUMAN				933910	0	0	0	0	0	0	0	0	0	0	0	0	0	0	0	0	0	0	0	0	0	0	0	0	0	0	0	0	0	0	0	0	0	0	0	0	0	0	0	0	0	0	0	0
sp|O76064|RNF8_HUMAN	sp|O76064|RNF8_HUMAN				0	0	0	0	0	0	0	0	0	0	0	0	0	0	0	0	0	0	0	0	0	0	0	0	0	0	0	0	0	0	0	0	0	0	0	0	0	0	0	0	0	0	0	0	0
sp|O76082|S22A5_HUMAN	sp|O76082|S22A5_HUMAN				0	0	0	0	0	0	0	0	0	0	0	0	0	0	0	0	0	0	0	0	0	0	0	0	0	0	0	0	0	0	0	0	0	0	0	0	0	0	0	0	0	0	0	0	0
sp|O76094|SRP72_HUMAN	sp|O76094|SRP72_HUMAN				32373000	8860900	0	0	0	0	0	0	0	0	0	0	0	0	0	0	0	0	0	2547000	0	0	0	0	0	0	0	0	0	0	0	0	0	0	0	0	0	0	0	0	0	0	0	1521900	0
sp|O94762|RECQ5_HUMAN	sp|O94762|RECQ5_HUMAN				0	0	0	0	0	5948300	0	0	0	126600000	0	165090000	0	172690000	0	0	0	0	0	0	0	0	0	0	0	0	0	0	0	0	0	0	0	0	0	0	0	0	0	483720000	0	79798000	562200000	0	0
sp|O94788|AL1A2_HUMAN	sp|O94788|AL1A2_HUMAN				0	0	0	0	0	0	0	0	0	0	0	0	0	0	0	0	0	0	0	0	0	0	0	0	0	0	0	0	0	0	0	0	0	0	0	0	0	0	0	0	0	0	0	0	0
sp|O94804|STK10_HUMAN	sp|O94804|STK10_HUMAN				0	0	0	0	0	3237900	0	0	0	0	0	0	0	0	0	0	0	0	0	0	0	0	0	0	0	0	0	0	1894400	0	0	0	0	0	0	0	0	0	0	0	0	0	0	0	0
sp|O94806|KPCD3_HUMAN;sp|Q15139|KPCD1_HUMAN	sp|O94806|KPCD3_HUMAN				0	0	0	0	0	1581800	916410	1953600	0	0	0	0	0	0	0	0	0	0	0	1838600	1069700	1490400	0	0	0	0	0	0	3279600	2617400	0	3623800	0	0	0	0	0	0	0	0	0	0	0	0	0
sp|O94813|SLIT2_HUMAN;sp|O75093|SLIT1_HUMAN	sp|O94813|SLIT2_HUMAN				0	0	17178000	1896800	4222500	0	8061300	6204100	0	2589600	2436000	0	0	11270000	0	0	0	0	0	0	2303000	0	0	45551000	5526900	0	5589500	0	9269900	0	0	13270000	80129000	100670000	1550200	36405000	45959000	0	36870000	2449000	0	102520000	2912500	15488000	0
sp|O94822|LTN1_HUMAN	sp|O94822|LTN1_HUMAN				0	0	2105000	3419500	0	3661200	5071800	0	0	0	0	0	0	0	873320	0	2688900	2495100	0	0	0	0	3622500	13069000	0	0	0	0	1817600	0	0	4572900	14305000	13076000	0	7463700	0	0	24701000	0	3120700	24871000	0	63810000	0
sp|O94826|TOM70_HUMAN	sp|O94826|TOM70_HUMAN				54826000	131050000	151480000	70606000	24213000	119990000	195870000	154700000	31306000	5162300	1246600	21084000	7097200	21308000	105220000	19103000	83514000	49481000	185740000	210060000	67354000	104770000	156300000	112690000	113450000	95472000	48461000	122450000	119880000	149780000	150920000	67149000	3494000	0	96862000	17678000	13727000	20573000	46969000	5616800	207330000	59638000	22761000	272390000	20779000
sp|O94830|DDHD2_HUMAN	sp|O94830|DDHD2_HUMAN				0	0	0	0	0	0	0	0	0	0	0	0	0	0	0	1200100	0	0	0	0	0	0	0	2572700	0	0	0	0	0	0	0	0	0	0	0	0	0	0	0	0	0	0	0	0	0
sp|O94842|TOX4_HUMAN;sp|O15405|TOX3_HUMAN;sp|Q96NM4|TOX2_HUMAN;sp|O94900|TOX_HUMAN	sp|O94842|TOX4_HUMAN				0	0	0	12749000	0	0	17508000	22642000	0	0	0	0	0	4036800	12325000	3304700	9249700	0	0	1804000	43899000	13682000	18539000	32850000	0	28625000	0	0	1010700	9199700	0	0	0	0	0	0	0	0	0	0	6987900	0	0	12155000	0
sp|O94854|K0754_HUMAN	sp|O94854|K0754_HUMAN				0	0	0	0	0	0	3623600	0	0	0	0	0	0	0	0	0	0	0	0	0	0	0	0	0	0	0	0	0	2342500	0	0	0	0	0	0	0	0	0	0	0	0	0	0	2131600	0
sp|O94874|UFL1_HUMAN	sp|O94874|UFL1_HUMAN				131180000	29593000	0	0	0	0	0	0	0	0	0	0	0	0	8311700	14805000	6644100	5773400	0	3754800	0	0	0	1496600	0	4172500	0	0	5037800	0	0	0	19340000	0	0	17135000	0	0	0	0	0	6427500	0	5113500	24332000
sp|O94876|TMCC1_HUMAN;sp|O75069|TMCC2_HUMAN	sp|O94876|TMCC1_HUMAN				0	0	0	0	0	0	0	0	0	0	0	0	0	0	0	0	0	0	0	0	0	0	0	0	0	0	0	0	0	0	0	0	19027000	0	0	20967000	0	0	3829800	0	0	0	0	0	8502100
sp|O94887|FARP2_HUMAN	sp|O94887|FARP2_HUMAN				0	0	0	0	0	0	0	0	0	0	0	0	0	0	0	0	0	0	0	0	0	0	0	0	0	0	0	0	0	0	0	0	0	0	0	0	0	0	0	0	0	0	0	0	0
sp|O94898|LRIG2_HUMAN	sp|O94898|LRIG2_HUMAN				0	0	0	0	0	0	0	0	0	0	0	0	0	0	0	0	0	0	0	928100	0	0	0	0	0	0	0	0	0	0	0	0	0	0	0	0	0	0	0	0	0	0	0	0	0
sp|O94901|SUN1_HUMAN	sp|O94901|SUN1_HUMAN				0	0	0	0	0	0	0	0	0	0	0	0	0	0	0	0	0	0	0	0	0	0	0	0	0	0	0	0	0	0	0	0	0	0	0	0	0	0	0	0	0	0	0	0	0
sp|O94903|PROSC_HUMAN	sp|O94903|PROSC_HUMAN				0	0	0	0	0	0	0	0	0	0	0	0	0	0	0	0	0	0	0	0	0	0	0	0	0	0	0	0	0	0	0	0	0	0	0	0	0	0	0	0	0	0	0	0	0
sp|O94906|PRP6_HUMAN	sp|O94906|PRP6_HUMAN				4969200	2938300	3504900	25263000	21670000	1953700	1288200	716700	0	2433700	0	0	0	0	0	6544400	0	28436000	5687200	0	853080	0	0	2958400	0	5535300	28951000	0	2345600	0	0	15038000	13809000	96244000	3657000	1961300	23773000	0	0	0	24816000	0	0	12696000	135450000
sp|O94925|GLSK_HUMAN	sp|O94925|GLSK_HUMAN				0	0	0	0	0	0	0	0	0	0	0	0	0	0	0	0	0	0	0	0	0	0	0	2278300	0	0	0	0	0	0	0	0	0	0	0	0	0	0	0	0	0	0	0	0	0
sp|O94927|HAUS5_HUMAN	sp|O94927|HAUS5_HUMAN				0	0	0	0	0	0	0	0	0	0	0	0	0	0	0	0	0	0	0	0	0	0	0	0	0	0	0	0	0	0	0	0	0	0	0	0	0	0	0	0	0	0	0	0	0
sp|O94953|KDM4B_HUMAN	sp|O94953|KDM4B_HUMAN				0	0	0	0	0	0	0	0	0	0	0	0	0	0	0	0	0	0	0	0	1605800	0	0	0	0	0	0	0	0	0	0	0	0	0	0	0	0	0	0	0	0	0	0	0	0
sp|O94966|UBP19_HUMAN	sp|O94966|UBP19_HUMAN				0	0	0	0	0	0	0	0	0	0	0	0	0	0	0	0	0	0	0	0	0	0	0	0	0	0	0	0	0	0	0	0	0	0	0	0	0	0	0	0	0	0	0	0	0
sp|O94986|CE152_HUMAN	sp|O94986|CE152_HUMAN				0	0	0	0	0	0	0	0	0	0	0	0	0	0	0	0	0	0	0	0	0	0	0	0	0	0	0	0	0	0	0	0	0	0	0	0	0	0	4612100	0	40833000	0	0	0	0
sp|O94988|FA13A_HUMAN;sp|Q8NE31|FA13C_HUMAN	sp|O94988|FA13A_HUMAN				0	0	0	0	0	0	0	0	0	0	2991900	0	0	0	0	0	0	0	0	0	0	0	0	0	0	0	0	0	0	0	0	0	0	0	0	0	0	0	0	0	0	0	0	0	0
sp|O94991|SLIK5_HUMAN	sp|O94991|SLIK5_HUMAN				0	0	9722000	8902900	11474000	11306000	9796800	20245000	0	0	6296100	4969600	6213000	3512600	35238000	33731000	38847000	16206000	12655000	29065000	16694000	4421400	4657000	0	0	6758100	19261000	8931200	18422000	11196000	0	15736000	0	0	0	0	0	0	6574200	0	5711500	11134000	0	13199000	0
sp|O95140|MFN2_HUMAN	sp|O95140|MFN2_HUMAN				0	0	0	0	0	0	0	0	0	0	0	0	0	0	0	0	0	0	0	0	0	0	0	0	0	0	0	0	0	0	0	0	0	0	0	0	0	0	0	0	0	0	0	0	0
sp|O95147|DUS14_HUMAN	sp|O95147|DUS14_HUMAN				0	0	0	0	0	0	0	0	0	0	0	0	0	0	0	0	0	0	0	0	0	0	0	0	0	0	0	0	0	0	0	0	0	0	0	0	0	0	0	0	0	0	0	0	0
sp|O95163|ELP1_HUMAN	sp|O95163|ELP1_HUMAN				0	0	0	0	0	3563700	5847200	0	0	0	0	0	0	0	0	0	5850600	0	0	0	35308000	23636000	24210000	0	1998300	12685000	0	0	0	0	0	0	0	0	0	0	0	0	0	0	0	0	0	4069600	0
sp|O95196|CSPG5_HUMAN	sp|O95196|CSPG5_HUMAN				0	0	0	0	0	0	0	0	0	0	0	0	0	0	0	0	0	0	0	0	0	0	0	0	0	0	0	0	0	0	0	0	0	0	0	0	0	0	0	0	0	0	0	0	0
sp|O95202|LETM1_HUMAN;sp|Q2VYF4|LETM2_HUMAN	sp|O95202|LETM1_HUMAN				23822000	2227000	22403000	44522000	7085800	8442300	38262000	9511500	6847300	8788000	8186200	0	3373000	21454000	24334000	8406300	35171000	10241000	11536000	33182000	120610000	271500000	177170000	589110000	2045700000	870200000	26713000	11549000	0	30644000	17778000	0	26207000	4201000	3310300	9129500	3383100	0	17282000	0	4973700	20499000	5966000	44093000	3476700
sp|O95210|STBD1_HUMAN	sp|O95210|STBD1_HUMAN				0	0	0	0	0	0	0	9207400	0	0	2784600	0	0	6271900	7483300	0	0	0	0	0	0	0	0	4610900	0	0	0	0	0	0	0	0	0	0	11026000	0	0	0	0	0	0	3018900	5980600	0	0
sp|O95218|ZRAB2_HUMAN	sp|O95218|ZRAB2_HUMAN				0	0	0	0	0	0	0	0	0	0	0	0	0	0	0	0	0	0	0	0	0	0	0	0	0	0	0	0	0	0	0	0	0	0	0	0	0	0	0	0	0	0	0	0	0
sp|O95219|SNX4_HUMAN	sp|O95219|SNX4_HUMAN				0	0	0	0	0	0	0	0	27130000	4616500	13380000	0	0	0	2874900	0	0	0	0	0	0	0	0	0	0	0	0	0	0	0	0	0	0	0	0	0	0	0	3701500	0	0	3963900	1221000	0	0
sp|O95232|LC7L3_HUMAN	sp|O95232|LC7L3_HUMAN				5058300	18948000	0	0	0	0	0	0	0	0	0	0	4226600	0	0	0	0	0	0	0	0	0	0	0	0	0	0	0	0	0	0	0	0	0	10224000	0	0	19957000	0	5505700	0	5141900	0	0	0
sp|O95235|KI20A_HUMAN	sp|O95235|KI20A_HUMAN				0	0	0	0	0	0	0	0	0	0	0	0	0	0	0	0	0	0	0	0	0	0	0	0	0	0	0	0	0	0	0	0	0	0	0	0	0	0	0	0	0	0	0	0	0
sp|O95239|KIF4A_HUMAN;sp|Q2VIQ3|KIF4B_HUMAN	sp|O95239|KIF4A_HUMAN				0	0	0	0	0	0	0	0	0	0	0	0	0	0	0	0	0	0	0	0	0	0	0	0	0	0	0	0	0	0	0	0	0	0	0	0	0	0	0	0	0	0	0	0	0
sp|O95248|MTMR5_HUMAN	sp|O95248|MTMR5_HUMAN				16115000	0	0	0	0	0	4068900	0	0	0	0	0	0	0	0	0	0	287960	0	0	915650000	928950000	491150000	69795000	43026000	23972000	0	0	832630	0	0	0	91841000	46976000	0	92355000	10514000	0	2663900	0	0	19027000	0	604810	14024000
sp|O95292|VAPB_HUMAN	sp|O95292|VAPB_HUMAN				135000000	70819000	37868000	8804200	47854000	84410000	44485000	75320000	36040000	17462000	19608000	16033000	9788400	0	130640000	32619000	84006000	22993000	68296000	70276000	57097000	42742000	106370000	35561000	33734000	39878000	34133000	31704000	80132000	30956000	17092000	26707000	27853000	10579000	41293000	21209000	11105000	2724100	6549100	26113000	39782000	26055000	35289000	51431000	5533100
sp|O95297|MPZL1_HUMAN	sp|O95297|MPZL1_HUMAN				0	0	0	0	0	0	0	0	0	0	0	0	0	0	0	0	0	0	0	0	0	0	0	0	0	0	0	0	0	0	0	0	0	0	12552000	0	0	0	0	0	0	0	0	0	0
sp|O95347|SMC2_HUMAN	sp|O95347|SMC2_HUMAN				0	0	0	0	0	0	0	0	0	0	0	0	0	0	0	6609500	0	0	0	0	0	0	0	0	0	0	0	0	0	0	0	0	0	0	0	0	0	0	0	0	0	0	0	0	0
sp|O95359|TACC2_HUMAN	sp|O95359|TACC2_HUMAN	+			0	0	0	0	0	0	0	0	0	0	0	0	0	0	0	0	0	0	0	0	0	0	0	0	0	0	0	0	0	0	0	0	0	0	0	0	0	0	0	0	0	0	0	0	0
sp|O95372|LYPA2_HUMAN	sp|O95372|LYPA2_HUMAN				54091000	42060000	17158000	8067800	14987000	60615000	43273000	74063000	17205000	18206000	20287000	0	27790000	26142000	45164000	25027000	34683000	20216000	33774000	63391000	43235000	29340000	57572000	26319000	9219300	24620000	26123000	81013000	27189000	63302000	61032000	15203000	12824000	0	82520000	0	0	0	0	24635000	84204000	10343000	32740000	101860000	13540000
sp|O95373|IPO7_HUMAN	sp|O95373|IPO7_HUMAN				0	105590000	0	0	0	0	0	0	0	0	0	0	0	0	8101200	0	7487200	4158700	13938000	16806000	20452000	1594300	8914200	28378000	22835000	24459000	7609900	0	0	4237500	0	0	26520000	0	3581400	0	0	0	104420000	0	5697500	79042000	0	2894200	30436000
sp|O95391|SLU7_HUMAN	sp|O95391|SLU7_HUMAN				0	0	0	0	0	0	0	0	0	5392900	0	0	0	0	0	0	0	1883400	0	0	0	0	0	0	0	0	0	0	0	0	0	0	8452000	0	0	18598000	0	0	2880900	0	0	3034600	0	0	6075600
sp|O95402|MED26_HUMAN	sp|O95402|MED26_HUMAN				0	0	0	0	0	0	0	0	0	0	0	0	2807900	0	0	0	0	0	0	0	0	0	0	0	0	0	0	0	0	0	0	0	0	0	0	0	0	0	0	0	0	0	0	0	3175200
sp|O95433|AHSA1_HUMAN	sp|O95433|AHSA1_HUMAN				8229800	9776200	0	0	0	8095900	9513100	3953200	0	0	2338800	4675900	5994000	7756400	7605700	0	17749000	4357300	8605600	11676000	0	0	9554900	4323800	6675900	2773600	2721000	0	0	0	0	13340000	0	0	8040000	0	0	11646000	0	5607700	3104600	0	10282000	0	0
sp|O95470|SGPL1_HUMAN	sp|O95470|SGPL1_HUMAN				74240000	30615000	0	12942000	6570600	0	8582100	0	8033000	17893000	5037800	0	41707000	4498700	3139000	0	0	0	0	5901200	3278700	0	0	8319900	0	6706100	16136000	0	13140000	0	0	10246000	92317000	64625000	6902700	57434000	22061000	0	28684000	10705000	6555400	29111000	681100	0	67900000
sp|O95478|NSA2_HUMAN	sp|O95478|NSA2_HUMAN				0	0	0	0	2192900	0	0	0	0	3305100	3277000	8505600	5039700	0	0	0	0	0	0	0	0	0	0	1036800	0	0	0	0	0	0	0	0	0	0	0	0	0	0	0	12374000	0	0	6899200	0	0
sp|O95486|SC24A_HUMAN	sp|O95486|SC24A_HUMAN				0	0	0	2142700	0	6292100	755240	0	0	0	0	0	0	0	1343600	1989900	7032500	1646100	0	715460	421240	0	0	313450	0	0	0	0	809920	0	0	1325900	0	0	0	0	0	0	0	0	1565700	0	0	3477500	0
sp|O95487|SC24B_HUMAN	sp|O95487|SC24B_HUMAN				0	0	2172600	3210800	12367000	13825000	9956500	18526000	0	0	4011500	0	0	0	12179000	9273000	10379000	0	5189000	3783200	6351500	5605100	0	0	4924900	0	0	0	24404000	8772100	0	15169000	0	0	0	0	0	0	0	0	8056700	0	0	23878000	0
sp|O95490|AGRL2_HUMAN	sp|O95490|AGRL2_HUMAN				0	0	0	0	0	0	0	0	0	0	0	0	0	0	0	9032900	0	0	0	4975100	0	0	0	0	0	0	0	0	0	0	0	0	0	0	0	0	0	0	0	0	0	0	0	0	0
sp|O95563|MPC2_HUMAN	sp|O95563|MPC2_HUMAN				0	0	0	0	0	0	0	0	0	0	0	0	0	0	0	0	0	0	0	0	0	0	0	0	0	0	0	0	0	0	0	0	0	0	0	0	0	0	0	0	0	0	0	0	0
sp|O95573|ACSL3_HUMAN	sp|O95573|ACSL3_HUMAN				3046200	8238100	27076000	18433000	4907900	18616000	23150000	25205000	0	0	0	0	0	0	50416000	4460500	13595000	2153900	6420400	75395000	9709000	0	0	4146300	7458000	3545400	3377200	0	8778300	11616000	0	0	0	0	5731500	0	0	0	0	0	6934300	3975100	0	61856000	3924200
sp|O95602|RPA1_HUMAN	sp|O95602|RPA1_HUMAN				0	0	0	0	0	0	0	0	0	0	0	0	0	0	0	0	0	0	0	0	0	0	0	0	0	0	0	0	0	0	0	0	0	0	0	0	0	0	0	0	0	0	0	0	0
sp|O95613|PCNT_HUMAN	sp|O95613|PCNT_HUMAN				0	0	0	19124000	12946000	0	1801700	7021500	0	0	5715600	0	10321000	9932300	0	0	0	3888800	9756200	5039200	53926000	54087000	99427000	54182000	230290000	60502000	319160000	0	59055000	11663000	0	43669000	9501100	10162000	31196000	14780000	7505100	58127000	0	20408000	32921000	0	30795000	35126000	0
sp|O95714|HERC2_HUMAN;sp|Q9BVR0|HRC23_HUMAN	sp|O95714|HERC2_HUMAN				0	0	0	0	0	0	0	0	0	0	0	0	0	0	0	0	0	0	0	0	0	0	0	0	0	0	0	0	0	0	0	0	0	0	0	0	0	0	0	0	0	0	0	0	0
sp|O95716|RAB3D_HUMAN	sp|O95716|RAB3D_HUMAN				0	0	0	0	0	2995800	1912100	3237000	0	0	0	0	0	0	0	0	0	0	3872000	0	0	0	7616900	0	0	0	0	0	0	3995600	0	0	0	0	0	0	0	0	0	0	0	0	0	0	0
sp|O95721|SNP29_HUMAN	sp|O95721|SNP29_HUMAN				140500000	32699000	115860000	88776000	172300000	163160000	135950000	358480000	190870000	196030000	151360000	362840000	193460000	82858000	199680000	94818000	103810000	119200000	174560000	177980000	100680000	164090000	336750000	50089000	52405000	101870000	178710000	454060000	29935000	414950000	364280000	32313000	90480000	45778000	315310000	0	24202000	202600000	167060000	516540000	252130000	193880000	729150000	211730000	93605000
sp|O95747|OXSR1_HUMAN	sp|O95747|OXSR1_HUMAN				0	0	0	0	0	0	0	0	0	0	0	0	0	0	0	0	0	0	0	0	0	0	0	0	0	0	0	0	0	0	0	0	0	0	0	0	0	0	0	0	0	0	0	0	0
sp|O95755|RAB36_HUMAN	sp|O95755|RAB36_HUMAN				0	0	0	0	0	0	0	0	0	0	0	0	0	0	0	0	0	0	0	0	0	0	0	0	0	0	0	0	0	0	0	0	0	0	0	0	0	0	0	0	0	0	0	0	0
sp|O95757|HS74L_HUMAN	sp|O95757|HS74L_HUMAN				0	0	0	0	0	0	0	6376900	0	0	0	0	0	0	0	0	7394300	3003200	4122400	3150700	4137900	0	3191200	12887000	1024300	5008400	0	0	0	4950100	0	5467700	0	0	0	0	0	0	0	0	2490300	0	0	0	0
sp|O95759|TBCD8_HUMAN	sp|O95759|TBCD8_HUMAN				0	0	0	0	0	0	0	0	0	0	0	0	0	0	0	0	0	0	0	0	3316300	0	0	1772400	0	0	0	0	0	0	0	0	0	0	0	0	0	0	4859900	0	0	3839200	0	0	0
sp|O95782|AP2A1_HUMAN;sp|O94973|AP2A2_HUMAN	sp|O95782|AP2A1_HUMAN;sp|O94973|AP2A2_HUMAN				0	0	0	1450500	0	0	0	0	0	0	0	0	1860600	0	0	0	0	0	0	0	652640	0	0	936820	0	0	0	0	1133600	0	0	0	0	0	0	0	0	0	0	0	0	0	0	0	0
sp|O95785|WIZ_HUMAN	sp|O95785|WIZ_HUMAN				0	0	0	0	0	0	0	0	0	0	0	0	3130300	0	0	0	0	0	0	0	0	0	0	0	0	0	0	0	0	0	0	2387300	0	0	0	0	0	0	0	0	0	0	0	0	0
sp|O95793|STAU1_HUMAN	sp|O95793|STAU1_HUMAN				0	0	0	0	0	0	0	2358800	0	0	0	0	0	0	2239600	0	0	0	0	0	264510	0	2250500	294690	0	724190	0	0	0	0	0	0	0	0	0	0	0	0	0	0	1741500	0	0	0	0
sp|O95801|TTC4_HUMAN	sp|O95801|TTC4_HUMAN				0	0	0	0	0	0	0	0	0	0	0	0	0	0	0	0	0	0	0	0	2342700	0	0	19466000	11641000	3601900	0	0	0	0	0	0	0	0	0	0	0	0	0	0	0	0	0	0	0
sp|O95816|BAG2_HUMAN	sp|O95816|BAG2_HUMAN				0	0	0	0	0	0	0	0	0	0	0	0	0	0	0	0	0	0	0	0	0	0	0	0	0	0	0	0	0	0	0	0	0	0	0	2151300	0	0	0	0	0	0	0	0	0
sp|O95817|BAG3_HUMAN	sp|O95817|BAG3_HUMAN				0	0	1758300	761640	1898000	766270	952350	2496800	0	0	3677200	0	0	0	1484300	0	0	0	3102200	0	0	343850	0	0	614570	0	4851300	0	0	2630700	0	0	897590	0	0	0	0	0	0	0	0	0	0	0	0
sp|O95819|M4K4_HUMAN	sp|O95819|M4K4_HUMAN				5547000	0	4053500	17040000	10240000	12936000	23049000	4951600	0	0	0	0	6591500	0	13251000	16307000	11490000	19426000	18273000	15942000	26045000	0	9898600	58540000	0	16301000	5257600	0	9154300	0	0	15056000	10274000	8127700	0	13967000	0	0	0	2943200	11780000	0	0	37000000	6768200
sp|O95831|AIFM1_HUMAN	sp|O95831|AIFM1_HUMAN				6591300	37827000	5388600	0	6710900	1996600	28602000	8233300	0	2807100	0	31591000	10115000	9266600	0	0	0	0	0	4234800	0	0	3051300	0	2107500	1726500	3935300	0	0	7198000	0	0	0	0	2102000	0	0	3101800	0	952110	0	2627000	0	1679000	0
sp|O95835|LATS1_HUMAN;sp|Q9NRM7|LATS2_HUMAN	sp|O95835|LATS1_HUMAN				0	0	0	0	0	3608700	0	4088800	0	0	0	0	0	0	0	0	0	0	0	0	0	0	0	0	0	0	0	0	0	0	0	0	0	0	0	0	0	0	0	0	0	0	0	0	0
sp|O95861|BPNT1_HUMAN	sp|O95861|BPNT1_HUMAN				15809000	23539000	0	0	4079000	8441700	3642600	7682300	0	0	1858500	0	0	5094200	0	0	0	0	2713600	0	0	0	5920200	0	0	0	0	4729500	0	0	0	0	0	0	0	0	0	2806500	0	0	0	0	6951900	0	0
sp|O95905|ECD_HUMAN	sp|O95905|ECD_HUMAN				0	0	0	3730700	0	0	0	2505600	0	0	0	0	0	0	1442900	0	0	0	0	1728800	193910	0	1716500	0	0	0	0	0	0	0	0	0	0	0	0	0	0	0	1250400	0	2682100	0	0	3919800	0
sp|O95969|SG1D2_HUMAN	sp|O95969|SG1D2_HUMAN				0	0	0	0	0	0	0	0	0	0	0	0	0	0	0	0	0	0	0	0	0	0	0	0	0	0	0	0	0	0	0	0	0	0	0	0	0	0	0	0	0	0	0	0	0
sp|O96004|HAND1_HUMAN	sp|O96004|HAND1_HUMAN				0	0	0	0	0	0	0	0	0	0	0	0	0	0	0	0	0	0	0	0	0	0	0	0	0	0	0	0	0	0	0	0	3451600	0	0	4256900	0	0	0	0	0	0	0	0	0
sp|O96005|CLPT1_HUMAN	sp|O96005|CLPT1_HUMAN				0	0	0	0	0	0	0	0	0	0	0	0	0	0	0	0	0	0	0	0	0	0	0	834690	0	0	0	0	623550	0	0	0	0	0	0	0	0	0	0	0	0	0	0	0	0
sp|O96007|MOC2B_HUMAN	sp|O96007|MOC2B_HUMAN				0	0	0	0	0	0	0	0	0	0	0	0	0	0	0	0	0	0	0	0	0	0	0	0	0	0	0	0	0	0	0	0	0	0	0	0	0	0	0	0	0	0	0	0	0
sp|O96011|PX11B_HUMAN	sp|O96011|PX11B_HUMAN				21236000	13835000	12311000	18751000	34089000	19713000	30045000	29125000	22279000	20896000	23178000	27598000	24300000	10887000	15925000	17442000	17796000	11504000	36065000	16020000	36288000	59671000	49023000	36800000	47499000	40793000	40651000	62914000	26150000	73711000	51574000	24326000	35732000	26591000	115370000	11315000	10366000	0	11432000	13543000	34754000	55416000	87728000	33171000	5839100
sp|O96013|PAK4_HUMAN;sp|Q9P286|PAK5_HUMAN;sp|Q9NQU5|PAK6_HUMAN	sp|O96013|PAK4_HUMAN				0	0	387710000	89640000	77493000	417190	1716600	8385200	0	0	0	0	0	0	0	0	0	0	3035100	0	0	0	0	0	0	0	0	0	0	0	0	0	0	0	0	0	0	0	0	0	0	0	0	0	0
sp|O96028|NSD2_HUMAN	sp|O96028|NSD2_HUMAN				0	0	0	0	0	0	0	0	0	0	0	0	0	0	0	0	0	0	0	0	0	0	0	0	0	0	0	0	0	0	0	0	0	0	0	0	0	0	0	0	0	0	0	0	0
sp|P00167|CYB5_HUMAN	sp|P00167|CYB5_HUMAN				0	0	0	2171900	0	0	0	0	3969300	0	0	0	4292800	4925100	0	0	3400800	0	0	0	0	0	0	0	0	0	0	0	0	0	0	0	0	0	0	0	0	0	0	0	0	0	0	0	0
sp|P00338|LDHA_HUMAN;sp|Q6ZMR3|LDH6A_HUMAN	sp|P00338|LDHA_HUMAN				0	32545000	0	0	45283000	2984300	0	3066500	7772400	3876100	4528400	0	11426000	0	0	0	71781000	0	0	0	0	0	8459000	9173200	3959700	0	0	0	11798000	0	0	0	0	0	11538000	0	0	24756000	0	34947000	5308200	0	9909700	0	0
sp|P00367|DHE3_HUMAN;sp|P49448|DHE4_HUMAN	sp|P00367|DHE3_HUMAN;sp|P49448|DHE4_HUMAN				0	0	0	0	0	0	0	0	0	3749900	5614400	0	6891300	0	0	0	0	0	0	0	0	0	0	0	0	0	0	0	0	0	0	0	0	0	0	0	0	0	0	4901900	0	0	0	0	0
sp|P00387|NB5R3_HUMAN	sp|P00387|NB5R3_HUMAN				5521900	8631800	0	0	0	0	0	0	0	1596400	2161100	0	3479200	0	0	0	0	0	0	0	0	0	0	0	0	0	0	2719900	0	0	0	0	0	0	5066300	0	0	2725800	0	6792500	0	0	6915000	0	0
sp|P00403|COX2_HUMAN	sp|P00403|COX2_HUMAN				0	0	0	0	0	0	0	0	0	0	0	0	0	0	0	0	0	0	0	0	0	0	0	0	0	0	0	0	0	0	0	0	0	0	0	0	0	0	0	0	0	0	0	0	0
sp|P00492|HPRT_HUMAN	sp|P00492|HPRT_HUMAN				0	0	0	0	0	0	0	0	0	0	0	0	0	0	0	0	0	0	0	0	0	0	0	0	0	0	0	0	0	0	0	0	0	0	0	0	0	0	0	0	0	0	0	0	0
sp|P00505|AATM_HUMAN	sp|P00505|AATM_HUMAN				0	0	0	0	0	0	0	0	0	0	0	0	0	1116600	0	0	0	0	0	0	0	0	0	0	0	0	0	0	0	0	0	0	0	0	0	0	0	0	0	0	0	0	0	0	0
sp|P00533|EGFR_HUMAN	sp|P00533|EGFR_HUMAN				0	0	0	0	0	0	0	0	0	0	0	0	0	0	0	0	0	0	3140500	4667300	0	0	0	1751900	0	0	0	0	2003300	0	0	2599400	0	0	0	0	0	0	0	0	0	0	0	2343000	0
sp|P00558|PGK1_HUMAN;sp|P07205|PGK2_HUMAN	sp|P00558|PGK1_HUMAN				0	0	0	0	1831700	0	0	0	0	0	0	0	0	699940	0	0	0	0	0	0	0	0	0	700990	0	1067500	0	0	0	0	0	0	0	0	0	0	0	0	0	0	0	0	1090700	0	0
sp|P00918|CAH2_HUMAN	sp|P00918|CAH2_HUMAN				0	0	0	0	0	0	0	0	0	0	0	0	0	0	0	0	9568900	0	0	0	0	0	0	0	0	0	0	0	0	0	0	0	0	0	0	0	0	0	0	0	0	0	0	0	0
sp|P00966|ASSY_HUMAN	sp|P00966|ASSY_HUMAN				0	0	0	0	0	0	0	0	0	0	0	0	0	0	0	0	0	0	0	0	0	0	0	0	0	0	0	0	0	0	0	0	0	0	0	0	0	0	58475000	656570000	759640000	0	49478000	0	0
sp|P01036|CYTS_HUMAN	sp|P01036|CYTS_HUMAN				0	0	0	0	0	0	0	0	0	0	0	0	0	0	0	0	0	0	0	0	0	0	0	0	0	0	0	0	0	0	0	0	0	0	0	0	0	0	0	0	0	0	0	0	0
sp|P01040|CYTA_HUMAN	sp|P01040|CYTA_HUMAN				0	0	0	0	0	0	0	0	0	0	0	0	0	0	0	0	0	0	0	0	0	0	0	0	0	0	0	0	0	0	0	0	0	0	0	0	0	0	0	0	0	0	0	0	0
sp|P01111|RASN_HUMAN;sp|P01112|RASH_HUMAN;sp|P01116|RASK_HUMAN	sp|P01111|RASN_HUMAN;sp|P01112|RASH_HUMAN				0	0	0	0	0	0	0	0	0	0	0	0	0	0	12073000000	11931000000	9628900000	9960300000	12267000000	10060000000	0	0	0	0	0	0	0	0	0	0	0	0	0	0	0	0	0	0	0	0	0	0	0	0	0
sp|P01591|IGJ_HUMAN	sp|P01591|IGJ_HUMAN				0	0	0	0	0	0	0	0	0	0	0	0	0	0	0	0	0	0	0	0	0	0	0	0	0	5824600	0	0	0	0	0	0	0	0	0	0	0	0	0	0	0	0	0	0	0
sp|P01833|PIGR_HUMAN	sp|P01833|PIGR_HUMAN				0	0	0	0	0	0	0	0	0	0	0	0	0	0	0	0	0	0	0	0	0	0	0	0	0	5359900	0	0	0	0	0	0	0	0	0	0	0	0	0	0	0	0	0	0	0
sp|P01834|IGKC_HUMAN	sp|P01834|IGKC_HUMAN				0	0	0	0	0	0	0	0	0	0	0	0	0	0	0	0	0	0	0	0	0	0	0	0	0	0	0	0	0	0	0	0	0	0	0	0	0	0	0	0	0	0	0	0	0
sp|P01857|IGHG1_HUMAN;sp|P01860|IGHG3_HUMAN	sp|P01857|IGHG1_HUMAN;sp|P01860|IGHG3_HUMAN				0	0	0	0	0	0	0	0	0	0	0	0	0	0	0	0	0	0	0	0	0	0	0	0	0	0	0	0	0	0	0	0	0	0	0	0	0	0	0	0	0	0	0	0	0
sp|P01871|IGHM_HUMAN	sp|P01871|IGHM_HUMAN				0	0	0	0	0	0	0	0	0	0	0	0	0	0	0	0	0	0	0	0	0	0	0	0	0	0	0	0	0	0	0	0	0	0	0	0	0	0	0	0	0	0	0	0	0
sp|P01876|IGHA1_HUMAN	sp|P01876|IGHA1_HUMAN				0	0	0	0	0	0	0	0	0	0	0	0	0	0	0	0	0	0	0	0	0	0	0	393480	0	49897000	0	0	0	0	0	0	0	0	0	0	0	0	0	0	0	0	0	0	0
sp|P01877|IGHA2_HUMAN	sp|P01877|IGHA2_HUMAN				0	0	0	0	0	0	0	0	0	0	0	0	0	0	0	0	0	0	0	0	0	0	0	0	0	0	0	0	0	0	0	0	0	0	0	0	0	0	0	0	0	0	0	0	0
sp|P02647|APOA1_HUMAN	sp|P02647|APOA1_HUMAN				0	0	0	0	0	0	0	0	0	0	0	0	0	0	0	0	0	0	0	0	0	0	0	0	0	0	0	0	0	0	0	0	0	0	0	0	0	0	0	0	0	0	0	0	0
sp|P02671|FIBA_HUMAN	sp|P02671|FIBA_HUMAN				0	0	0	0	0	0	0	0	0	0	0	0	0	0	0	0	0	0	0	0	0	0	0	0	0	53764000	0	0	0	0	0	0	0	0	0	0	0	0	0	0	0	0	0	0	0
sp|P02675|FIBB_HUMAN	sp|P02675|FIBB_HUMAN				0	0	0	0	0	0	0	0	0	0	0	0	0	0	0	0	0	0	0	0	0	0	0	0	0	63269000	0	0	0	0	0	0	0	0	0	0	0	0	0	0	0	0	0	0	0
sp|P02679|FIBG_HUMAN	sp|P02679|FIBG_HUMAN				0	0	0	0	0	0	0	0	0	0	0	0	0	0	0	0	0	0	0	0	7944200	0	0	0	0	0	0	0	0	0	0	0	0	0	0	0	0	0	0	0	0	0	0	0	0
sp|P02786|TFR1_HUMAN	sp|P02786|TFR1_HUMAN				41030000	36199000	12136000	11750000	4585700	0	0	22540000	0	0	0	0	0	0	6197900	17880000	31267000	6463800	0	21122000	1487200	0	0	10412000	0	0	0	0	16023000	1768200	0	0	0	0	0	0	0	0	0	0	0	5071800	0	0	0
sp|P02788|TRFL_HUMAN	sp|P02788|TRFL_HUMAN				0	0	0	0	0	0	0	0	0	0	0	0	0	0	0	0	0	0	0	0	0	0	0	0	0	39634000	0	0	0	0	0	0	0	0	0	5257700	0	14023000	0	0	0	0	0	0	0
sp|P02810|PRPC_HUMAN	sp|P02810|PRPC_HUMAN				0	0	0	0	0	0	0	0	0	0	0	0	0	0	0	0	0	0	0	0	0	0	0	0	0	0	0	0	0	0	0	0	0	0	0	0	0	0	0	0	0	0	0	722500	0
sp|P03973|SLPI_HUMAN	sp|P03973|SLPI_HUMAN				0	0	0	0	0	0	0	0	0	0	0	0	0	0	0	0	0	0	0	0	0	0	0	0	0	0	0	0	0	0	0	0	0	0	0	0	0	0	0	0	0	0	0	0	0
sp|P04049|RAF1_HUMAN	sp|P04049|RAF1_HUMAN				0	0	3047400	0	0	0	0	0	0	0	0	0	0	0	64200000	143180000	87633000	0	0	0	0	0	0	0	0	0	0	0	0	0	0	0	0	0	0	0	0	0	0	0	0	0	0	0	0
sp|P04075|ALDOA_HUMAN;sp|P09972|ALDOC_HUMAN;sp|P05062|ALDOB_HUMAN	sp|P04075|ALDOA_HUMAN				0	28440000	0	0	16303000	0	0	0	6873000	0	0	0	6249700	5892000	0	0	10189000	0	0	0	0	0	0	16160000	5806400	9678300	0	0	0	0	0	0	0	0	0	0	0	15649000	0	21575000	0	0	18894000	0	0
sp|P04080|CYTB_HUMAN	sp|P04080|CYTB_HUMAN				0	0	0	0	0	0	0	0	0	0	0	0	0	0	0	0	0	0	0	0	0	0	0	0	0	0	0	0	0	0	0	0	0	0	0	0	0	0	0	0	0	0	0	0	0
sp|P04083|ANXA1_HUMAN	sp|P04083|ANXA1_HUMAN				0	0	0	0	0	0	0	0	0	0	0	0	0	0	0	0	0	0	0	0	0	0	0	0	0	11511000	0	0	0	0	0	0	0	0	0	0	0	0	0	0	6921000	0	0	0	0
sp|P04150|GCR_HUMAN	sp|P04150|GCR_HUMAN				0	0	0	0	0	0	0	0	0	0	0	0	0	0	288150	0	0	0	0	0	0	0	0	0	0	0	0	0	756310	0	0	0	0	0	0	0	0	0	0	0	0	0	0	0	0
sp|P04181|OAT_HUMAN	sp|P04181|OAT_HUMAN				3223000	5862100	0	0	0	0	0	0	0	0	0	0	0	2224700	0	0	0	0	0	0	0	0	0	0	0	0	0	0	0	0	0	0	0	0	0	0	0	0	0	2607300	0	0	0	0	0
sp|P04259|K2C6B_HUMAN	sp|P04259|K2C6B_HUMAN	+			0	0	0	0	0	0	0	0	0	0	0	0	0	0	0	0	0	0	0	0	0	0	0	0	0	0	0	0	0	0	0	0	0	0	0	0	0	0	0	0	0	0	0	0	0
sp|P04264|K2C1_HUMAN;CON__P04264;CON__H-INV:HIT000016045	sp|P04264|K2C1_HUMAN;CON__P04264			+	1197600000	2808900000	1673000000	1799700000	1702400000	603150000	1279600000	1309300000	1572700000	2184100000	5690900000	656520000	2043200000	2736700000	2086600000	2750300000	1474200000	3828400000	2730000000	2608700000	3355200000	1666500000	2285500000	2890800000	1934400000	1937400000	1542500000	552300000	978970000	3537600000	14133000	2245200000	2404300000	2969600000	1919600000	1636000000	2661300000	3275600000	628860000	1377300000	6061500000	8060700000	1849400000	2065300000	1331300000
sp|P04350|TBB4A_HUMAN	sp|P04350|TBB4A_HUMAN				0	0	0	0	0	0	0	0	0	0	0	0	0	0	0	2275200	0	2684400	0	0	0	0	0	0	1695100	0	0	0	0	0	0	0	0	0	0	0	0	0	0	0	2816800	0	0	0	0
sp|P04406|G3P_HUMAN	sp|P04406|G3P_HUMAN				16346000	28338000	0	7061900	41257000	7593100	0	0	14792000	0	0	0	0	12849000	6604800	0	79109000	0	3477700	31746000	5238500	9269100	8272200	8017600	18545000	17389000	0	0	23366000	0	0	4653800	29866000	0	0	0	0	0	0	56537000	0	0	4416500	0	0
sp|P13746|1A11_HUMAN;sp|P05534|1A24_HUMAN;sp|P04439|1A03_HUMAN;sp|P01893|HLAH_HUMAN;sp|Q09160|1A80_HUMAN;sp|P30455|1A36_HUMAN;sp|P30443|1A01_HUMAN;sp|P30512|1A29_HUMAN;sp|P30459|1A74_HUMAN;sp|P30457|1A66_HUMAN;sp|P30456|1A43_HUMAN;sp|P30453|1A34_HUMAN;sp|P30450|1A26_HUMAN;sp|P30447|1A23_HUMAN;sp|P18462|1A25_HUMAN;sp|P16190|1A33_HUMAN;sp|P16189|1A31_HUMAN;sp|P16188|1A30_HUMAN;sp|P10316|1A69_HUMAN;…	sp|P13746|1A11_HUMAN;sp|P05534|1A24_HUMAN;sp|P04439|1A03_HUMAN;sp|P01893|HLAH_HUMAN;sp|Q09160|1A80_HUMAN;sp|P30455|1A36_HUMAN;sp|P30443|1A01_HUMAN;sp|P30512|1A29_HUMAN;sp|P30459|1A74_HUMAN;sp|P30457|1A66_HUMAN;sp|P30456|1A43_HUMAN;sp|P30453|1A34_HUMAN;sp|P30450|1A26_HUMAN;sp|P30447|1A23_HUMAN;sp|P18462|1A25_HUMAN;sp|P16190|1A33_HUMAN;sp|P16189|1A31_HUMAN;sp|P16188|1A30_HUMAN;sp|P10316|1A69_HUMAN;…				1279700	0	0	0	0	0	0	0	0	0	0	0	0	783210	0	0	0	0	0	0	0	0	0	0	0	0	0	0	0	0	0	0	0	0	0	0	0	0	0	0	0	1598500	0	0	0
sp|P04745|AMY1_HUMAN;sp|P19961|AMY2B_HUMAN;sp|P04746|AMYP_HUMAN;CON__Q3MHH8	sp|P04745|AMY1_HUMAN;sp|P19961|AMY2B_HUMAN;sp|P04746|AMYP_HUMAN				0	0	0	0	0	0	0	0	0	0	0	0	0	0	0	0	0	0	0	0	0	0	0	0	0	0	0	0	0	0	0	0	0	0	0	0	0	0	0	0	0	0	0	0	0
sp|P04792|HSPB1_HUMAN	sp|P04792|HSPB1_HUMAN				0	0	0	0	0	0	0	0	0	0	0	0	0	0	0	0	0	0	0	0	0	0	0	0	0	1270600	0	0	0	0	0	0	0	0	0	0	0	0	0	0	0	0	0	0	0
sp|P04818|TYSY_HUMAN	sp|P04818|TYSY_HUMAN				0	0	0	0	0	0	0	0	0	0	0	0	0	0	0	0	0	0	0	0	0	0	0	0	0	0	0	0	0	0	0	0	0	0	0	0	0	0	0	0	0	0	0	0	0
sp|P04843|RPN1_HUMAN	sp|P04843|RPN1_HUMAN				130940000	161300000	2054800	0	0	0	7411600	0	0	0	1989000	0	1520200	0	0	0	2665800	0	0	2796900	336410	0	0	11060000	1803400	0	0	0	4665600	0	0	0	1707300	0	0	0	0	0	0	0	0	0	0	0	0
sp|P04844|RPN2_HUMAN	sp|P04844|RPN2_HUMAN				0	0	0	0	0	0	0	0	0	0	0	0	0	0	0	0	0	0	0	0	0	0	0	0	0	517120	0	0	0	0	0	0	0	0	0	0	0	0	0	0	0	0	0	0	0
sp|Q99878|H2A1J_HUMAN;sp|Q96KK5|H2A1H_HUMAN;sp|Q9BTM1|H2AJ_HUMAN;sp|Q16777|H2A2C_HUMAN;sp|Q93077|H2A1C_HUMAN;sp|Q7L7L0|H2A3_HUMAN;sp|Q6FI13|H2A2A_HUMAN;sp|P20671|H2A1D_HUMAN;sp|P0C0S8|H2A1_HUMAN;sp|P04908|H2A1B_HUMAN;sp|Q71UI9|H2AV_HUMAN;sp|P0C0S5|H2AZ_HUMAN;sp|Q96QV6|H2A1A_HUMAN;sp|P16104|H2AX_HUMAN;sp|Q8IUE6|H2A2B_HUMAN	sp|Q99878|H2A1J_HUMAN;sp|Q96KK5|H2A1H_HUMAN;sp|Q9BTM1|H2AJ_HUMAN;sp|Q16777|H2A2C_HUMAN;sp|Q93077|H2A1C_HUMAN;sp|Q7L7L0|H2A3_HUMAN;sp|Q6FI13|H2A2A_HUMAN;sp|P20671|H2A1D_HUMAN;sp|P0C0S8|H2A1_HUMAN;sp|P04908|H2A1B_HUMAN;sp|Q71UI9|H2AV_HUMAN;sp|P0C0S5|H2AZ_HUMAN;sp|Q96QV6|H2A1A_HUMAN;sp|P16104|H2AX_HUMAN				8359500	18370000	0	3150700	5397500	0	1440000	0	2859200	2424500	0	0	6929400	13478000	0	0	9362900	0	0	6741600	0	0	4792000	5008100	3063100	113810000	0	0	0	0	0	0	0	0	3902400	0	0	7126300	0	0	0	0	0	0	0
sp|P04920|B3A2_HUMAN;sp|P48751|B3A3_HUMAN	sp|P04920|B3A2_HUMAN				0	0	0	0	0	0	0	0	0	0	0	0	0	0	1910100	0	0	0	3029700	0	0	0	0	0	0	0	0	0	0	0	0	0	0	0	0	0	0	0	0	0	0	0	0	0	0
sp|P05023|AT1A1_HUMAN;sp|P13637|AT1A3_HUMAN;sp|P50993|AT1A2_HUMAN;sp|Q13733|AT1A4_HUMAN;sp|P20648|ATP4A_HUMAN	sp|P05023|AT1A1_HUMAN				167730000	473770000	84775000	129180000	103970000	77020000	74712000	135260000	0	12332000	0	34576000	63526000	57558000	172560000	211850000	233160000	187950000	99898000	192920000	101660000	23812000	84216000	121420000	0	139370000	46522000	9379200	221460000	63850000	31130000	165130000	105000000	40504000	3170800	101340000	117630000	0	78617000	0	72133000	105340000	0	169640000	213830000
sp|P05067|A4_HUMAN	sp|P05067|A4_HUMAN				0	0	5626000	0	0	0	0	2892700	0	0	0	0	0	0	8701600	0	4264600	0	0	3792600	1155400	0	0	491630	0	0	0	0	8254600	0	0	0	49098000	18637000	83054000	0	0	0	0	0	0	0	0	0	0
sp|P05089|ARGI1_HUMAN	sp|P05089|ARGI1_HUMAN				0	0	0	0	0	0	0	0	0	0	0	0	0	0	0	0	0	0	0	0	0	0	0	0	0	0	0	0	0	0	0	0	0	0	0	0	0	0	0	0	0	0	0	0	0
sp|P05090|APOD_HUMAN	sp|P05090|APOD_HUMAN				0	0	0	0	0	0	0	0	0	0	0	0	0	0	0	0	0	0	0	0	0	0	0	0	0	0	0	0	0	0	0	0	0	0	0	0	0	0	0	0	0	0	0	60670000	0
sp|P05109|S10A8_HUMAN	sp|P05109|S10A8_HUMAN				0	0	0	0	0	0	0	0	0	0	0	1819900	0	0	0	0	18864000	0	0	0	5467900	0	0	492810	0	0	0	0	0	0	0	0	0	0	0	0	0	0	0	0	0	0	0	0	0
sp|P05141|ADT2_HUMAN	sp|P05141|ADT2_HUMAN				536220000	243290000	460440000	665290000	598320000	557270000	706010000	475110000	304700000	205200000	117820000	458840000	478410000	166160000	471670000	567520000	354480000	610620000	446970000	334070000	490960000	328770000	738120000	889940000	840440000	1128500000	564140000	129010000	429540000	309260000	157570000	188950000	628100000	594670000	263590000	633700000	350300000	71921000	198240000	154450000	406800000	144890000	72452000	253600000	715530000
sp|P05165|PCCA_HUMAN	sp|P05165|PCCA_HUMAN				447850000	2790900000	1604000000	642130000	1494900000	85846000	163190000	378780000	17653000	2779800000	4181900000	0	3844000000	3856500000	5173900	891360000	55809000	1631600000	100100000	253780000	245540000	449900000	37953000	4211200000	8691100000	1991300000	278780000	648990000	100760000	451850000	1663500000	233910000	453170000	1478200000	14955000000	2664000000	4383800000	17183000000	893450000	10424000000	155860000	593570000	9678100000	72515000	578400000
sp|P05166|PCCB_HUMAN	sp|P05166|PCCB_HUMAN				0	0	0	0	0	0	0	0	0	3756000	5330700	0	18211000	9245400	0	0	0	0	0	0	0	0	0	1768800	0	0	0	0	0	0	0	0	0	0	8336100	0	0	38968000	0	36173000	0	0	25899000	0	0
sp|P05198|IF2A_HUMAN	sp|P05198|IF2A_HUMAN				0	0	0	0	0	0	0	0	0	0	0	0	0	0	0	0	0	0	0	0	0	0	0	0	0	0	0	0	0	0	0	0	0	0	0	0	0	6205200	0	0	0	0	0	0	0
sp|P05386|RLA1_HUMAN	sp|P05386|RLA1_HUMAN				0	0	0	0	1042000	0	0	0	0	0	0	0	0	0	0	0	0	0	0	0	0	0	0	186130	0	0	0	0	0	0	0	0	0	0	0	0	0	0	0	0	0	0	0	0	0
sp|P05387|RLA2_HUMAN	sp|P05387|RLA2_HUMAN				0	0	0	0	8221500	0	0	0	0	0	0	0	0	0	0	0	0	0	0	0	0	0	0	0	0	0	0	0	0	0	0	0	0	0	0	0	0	0	0	0	0	10437000	0	0	0
sp|P05388|RLA0_HUMAN;sp|Q8NHW5|RLA0L_HUMAN	sp|P05388|RLA0_HUMAN;sp|Q8NHW5|RLA0L_HUMAN				1757900	10748000	0	0	4810300	0	0	0	1844300	826180	0	0	0	0	0	0	0	0	0	0	0	0	0	4353600	0	0	0	0	0	0	0	0	0	0	0	0	0	0	0	6832100	0	0	0	0	0
sp|P05412|JUN_HUMAN	sp|P05412|JUN_HUMAN				4557700	6468500	0	0	0	0	0	0	0	0	0	0	3140300	7831300	0	0	0	0	0	0	0	0	0	0	0	0	0	0	0	0	0	0	0	0	0	0	0	0	0	0	0	0	0	0	0
sp|P05455|LA_HUMAN	sp|P05455|LA_HUMAN				0	0	0	0	0	0	0	0	0	0	0	0	0	0	0	0	0	0	0	0	0	0	0	0	0	0	0	0	0	0	0	0	0	0	0	0	0	0	0	3470200	0	0	2132300	0	0
sp|P05556|ITB1_HUMAN	sp|P05556|ITB1_HUMAN				0	0	31819000	12266000	19414000	21294000	11075000	48084000	0	4333600	0	75201000	14158000	20443000	95515000	60810000	77368000	28947000	80632000	93801000	28203000	5482700	54337000	4994300	0	50025000	72026000	0	30702000	57022000	0	58787000	4910400	1897600	0	0	1769000	0	2903600	0	8704000	84238000	0	19747000	0
sp|P05783|K1C18_HUMAN	sp|P05783|K1C18_HUMAN				0	0	0	0	0	0	0	0	0	0	0	0	0	0	0	0	0	0	0	0	0	0	0	0	0	0	0	0	0	0	0	0	0	0	0	0	0	0	0	0	0	0	0	0	0
sp|P06396|GELS_HUMAN;CON__Q3SX14	sp|P06396|GELS_HUMAN;CON__Q3SX14			+	0	0	0	0	0	0	0	0	0	0	0	0	0	0	0	0	0	0	0	0	0	0	0	0	0	15267000	0	0	0	0	0	0	0	0	0	0	0	0	0	0	0	0	0	0	0
sp|P06454|PTMA_HUMAN	sp|P06454|PTMA_HUMAN				0	0	0	0	1817300	0	0	0	0	0	0	0	0	0	0	0	0	0	0	0	0	0	0	0	0	0	0	0	0	0	0	0	0	0	0	0	0	0	0	0	0	0	0	0	0
sp|P06493|CDK1_HUMAN	sp|P06493|CDK1_HUMAN				0	0	0	0	0	3466500	0	0	2708500	1230200	2022400	0	0	0	0	0	0	0	0	0	0	0	3833200	0	0	0	0	0	0	0	0	0	0	0	4208800	0	0	0	0	0	0	0	0	0	0
sp|P06576|ATPB_HUMAN	sp|P06576|ATPB_HUMAN				122070000	204660000	81516000	125010000	81234000	44835000	127890000	56064000	225530000	36221000	88508000	212180000	144790000	99886000	198680000	135730000	201580000	115580000	228300000	182720000	88281000	236290000	240400000	359650000	1475600000	1087900000	229640000	75752000	49878000	195140000	67345000	11873000	57861000	25697000	120100000	28654000	0	81194000	158910000	97701000	176000000	109190000	64456000	121930000	40224000
sp|P06702|S10A9_HUMAN	sp|P06702|S10A9_HUMAN				0	0	0	0	0	0	0	0	0	0	0	0	0	0	0	0	0	0	0	0	4788200	0	0	0	0	0	0	0	0	0	0	0	0	0	0	0	0	0	0	0	0	11635000	0	0	0
sp|P06733|ENOA_HUMAN;sp|P09104|ENOG_HUMAN	sp|P06733|ENOA_HUMAN				0	117340000	0	12632000	42766000	19540000	21784000	5970100	26154000	0	0	12027000	21877000	4069400	32777000	3986800	154400000	0	9895800	27868000	7312300	18656000	11878000	29773000	33576000	7623700	6284300	7505400	15401000	11666000	0	0	13792000	8122600	8992000	0	0	3579500	3591300	20253000	37359000	14651000	14699000	13661000	4590900
sp|P06737|PYGL_HUMAN;sp|P11217|PYGM_HUMAN	sp|P06737|PYGL_HUMAN				0	0	0	0	0	0	0	2088200	0	0	0	0	0	0	0	0	3655100	0	0	3081900	0	0	0	1901100	0	0	0	0	2028200	0	0	0	0	0	0	0	0	0	0	0	0	0	0	0	0
sp|P06744|G6PI_HUMAN;CON__Q3ZBD7;sp|Q8N196|SIX5_HUMAN	sp|P06744|G6PI_HUMAN;CON__Q3ZBD7;sp|Q8N196|SIX5_HUMAN			+	0	0	0	0	0	0	0	0	0	0	0	0	0	0	0	0	2058300	0	0	0	0	0	0	0	0	0	0	0	0	0	0	0	0	0	0	0	0	0	0	0	0	0	0	0	0
sp|P06748|NPM_HUMAN	sp|P06748|NPM_HUMAN				0	42983000	0	0	32583000	9818300	0	7083800	10537000	0	0	0	10039000	8279400	3496500	0	5796700	0	0	4783600	0	0	12903000	3072600	6380400	0	0	0	6123800	0	0	0	0	0	0	0	0	30428000	0	19826000	0	0	0	0	0
sp|P06753|TPM3_HUMAN	sp|P06753|TPM3_HUMAN				0	0	0	0	0	0	0	0	0	0	0	0	0	0	0	0	0	0	0	0	0	0	0	0	0	0	0	0	0	0	0	0	0	0	0	0	0	0	0	0	0	0	0	0	0
sp|Q16778|H2B2E_HUMAN;sp|P33778|H2B1B_HUMAN;sp|P23527|H2B1O_HUMAN;sp|P06899|H2B1J_HUMAN;sp|Q8N257|H2B3B_HUMAN;sp|Q96A08|H2B1A_HUMAN;sp|Q6DRA6|H2B2D_HUMAN;sp|Q6DN03|H2B2C_HUMAN	sp|Q16778|H2B2E_HUMAN;sp|P33778|H2B1B_HUMAN;sp|P23527|H2B1O_HUMAN;sp|P06899|H2B1J_HUMAN;sp|Q8N257|H2B3B_HUMAN;sp|Q96A08|H2B1A_HUMAN	+			0	0	0	0	0	0	0	0	0	0	0	0	0	0	0	0	0	0	0	0	0	0	0	0	0	0	0	0	0	0	0	0	0	0	0	0	0	0	0	0	0	0	0	0	0
sp|P07195|LDHB_HUMAN	sp|P07195|LDHB_HUMAN				0	32208000	0	0	23702000	6485100	0	3481900	6370500	0	0	0	3701000	0	0	0	61228000	0	0	6146300	0	7942800	0	11848000	0	0	0	0	12253000	0	0	0	0	0	0	0	0	5719300	0	12509000	1963200	0	0	0	0
sp|P07197|NFM_HUMAN	sp|P07197|NFM_HUMAN				0	0	0	0	0	0	0	0	0	0	0	0	0	0	0	0	0	0	0	0	0	0	0	0	0	0	0	0	0	0	0	0	0	0	0	0	0	0	0	0	0	0	0	0	0
sp|P07237|PDIA1_HUMAN	sp|P07237|PDIA1_HUMAN				0	0	0	0	0	0	0	0	0	0	0	0	0	0	0	0	0	0	0	0	0	0	0	0	0	0	0	0	0	0	0	0	0	0	0	0	0	0	0	0	0	0	0	0	0
sp|P07305|H10_HUMAN	sp|P07305|H10_HUMAN				40826000	66724000	40199000	61755000	88543000	10210000	0	50183000	31814000	111590000	86467000	0	159960000	79252000	15179000	20178000	5605600	18594000	11028000	0	11871000	52916000	31411000	12409000	48167000	30951000	12856000	71190000	9326500	11033000	47234000	10952000	18569000	0	321540000	28563000	0	187150000	0	328230000	9803700	0	375720000	6675300	30619000
sp|P07355|ANXA2_HUMAN;sp|A6NMY6|AXA2L_HUMAN	sp|P07355|ANXA2_HUMAN;sp|A6NMY6|AXA2L_HUMAN				14915000	15560000	0	0	0	6040400	0	0	0	0	4185500	0	5556800	8630700	5971800	4617400	10110000	5133300	2991100	10731000	8344500	15874000	6469700	3986200	0	1895600	0	1497700	6618000	5607700	0	5827500	0	0	10161000	0	0	10724000	0	14233000	8785900	0	11757000	10058000	0
sp|P07437|TBB5_HUMAN;sp|A6NNZ2|TBB8L_HUMAN;CON__ENSEMBL:ENSBTAP00000025008	sp|P07437|TBB5_HUMAN				53070000	69452000	133430000	82248000	87226000	75440000	87072000	63791000	115820000	91485000	129440000	83920000	184430000	191680000	104730000	122710000	141580000	117410000	94491000	153660000	60114000	81490000	85127000	84831000	69660000	116660000	125830000	4972900	73433000	20130000	0	71066000	211520000	100460000	76428000	73450000	189150000	53541000	185570000	121660000	148530000	114830000	51166000	99391000	150240000
sp|P07737|PROF1_HUMAN;CON__P02584	sp|P07737|PROF1_HUMAN				7368000	9360200	4777500	9841100	33230000	32232000	13271000	39454000	28367000	8199100	15656000	12691000	4176200	12723000	6281700	0	58569000	0	9075700	18227000	0	23597000	30062000	11567000	12322000	25662000	0	17788000	0	0	13482000	12717000	0	0	11055000	0	0	3910300	0	6678700	7416700	0	17324000	0	0
sp|P07814|SYEP_HUMAN	sp|P07814|SYEP_HUMAN				12785000	0	0	0	6545200	0	1575100	0	0	0	1757700	0	0	4756200	0	3352000	3381500	6323500	0	4892100	14359000	909350	5084100	248670000	174990000	27182000	0	0	0	0	0	0	0	0	1319700	0	0	0	0	3368400	0	0	0	711410	0
sp|P07900|HS90A_HUMAN;sp|Q14568|HS902_HUMAN;sp|Q58FG0|HS905_HUMAN	sp|P07900|HS90A_HUMAN				12482000	68422000	0	22311000	79170000	0	7384600	1410900	0	3517500	0	26882000	0	4440600	5679400	10548000	141430000	14647000	0	32355000	22739000	37486000	0	145490000	26915000	79017000	0	2842500	56877000	0	0	0	14710000	0	0	15196000	4471500	22121000	0	12992000	0	0	2378800	856530	0
sp|P07910|HNRPC_HUMAN;sp|P0DMR1|HNRC4_HUMAN;sp|O60812|HNRC1_HUMAN;sp|B7ZW38|HNRC3_HUMAN;sp|B2RXH8|HNRC2_HUMAN	sp|P07910|HNRPC_HUMAN;sp|P0DMR1|HNRC4_HUMAN;sp|O60812|HNRC1_HUMAN;sp|B7ZW38|HNRC3_HUMAN;sp|B2RXH8|HNRC2_HUMAN				0	0	0	0	0	0	0	0	0	0	0	0	0	0	0	0	0	0	0	0	0	0	0	0	0	0	0	0	0	0	0	0	0	0	0	0	0	3051500	0	1780200	0	0	0	0	0
sp|P08069|IGF1R_HUMAN	sp|P08069|IGF1R_HUMAN				0	0	0	0	0	0	0	0	0	0	0	0	0	0	0	0	0	0	0	0	0	0	0	0	0	0	0	0	0	0	0	0	0	0	0	0	0	0	0	0	0	0	0	0	0
sp|P08133|ANXA6_HUMAN	sp|P08133|ANXA6_HUMAN				0	0	0	0	0	0	0	0	0	0	0	0	0	0	0	0	0	0	0	0	0	0	0	0	0	0	0	0	0	0	0	0	0	0	0	0	0	0	0	0	0	0	0	0	0
sp|P08195|4F2_HUMAN	sp|P08195|4F2_HUMAN				1944100000	2098000000	1041100000	1145200000	592560000	523880000	598650000	779920000	312610000	470980000	285410000	254280000	345530000	325700000	1563200000	2758300000	1762200000	1846100000	738710000	1397700000	380930000	451720000	363920000	453720000	310110000	508260000	513640000	336400000	717290000	523940000	400830000	699340000	162510000	80763000	108110000	361980000	239940000	28911000	190830000	46820000	175220000	434230000	171410000	640040000	307380000
sp|P08237|PFKAM_HUMAN	sp|P08237|PFKAM_HUMAN				0	0	0	0	0	0	0	0	0	0	0	0	0	0	0	0	0	0	0	0	0	0	0	0	0	0	0	0	0	0	0	0	2329300	0	0	2977600	0	0	0	0	0	0	0	0	0
sp|P08238|HS90B_HUMAN;sp|Q58FF7|H90B3_HUMAN;sp|Q58FG1|HS904_HUMAN	sp|P08238|HS90B_HUMAN				806060000	588720000	304230000	451120000	747110000	230900000	304680000	291410000	0	151140000	53638000	331190000	211920000	207600000	384780000	376490000	690930000	578780000	372360000	627250000	464680000	694900000	307770000	2515400000	1383100000	2430700000	262650000	234970000	400940000	370280000	333800000	93529000	254830000	56749000	31556000	754910000	671870000	1342200000	76957000	166900000	128110000	134710000	101510000	235830000	204720000
sp|P08240|SRPRA_HUMAN	sp|P08240|SRPRA_HUMAN				6142700	7339500	24092000	4022600	0	9107200	17531000	24346000	0	0	0	0	0	0	67073000	1833800	11229000	3176900	7055300	41525000	162770	0	2521900	285790	0	703970	2102400	0	6320700	4485000	0	0	3001200	4796700	4121800	4209000	1765500	0	5353600	0	9105000	0	0	43598000	9347700
sp|P08243|ASNS_HUMAN	sp|P08243|ASNS_HUMAN				0	0	0	0	0	0	0	1373500	0	0	0	0	0	0	0	0	2369400	0	0	0	0	0	0	304190	0	1840200	0	0	0	0	0	0	0	0	0	0	0	0	0	0	3965800	0	0	0	0
sp|P08559|ODPA_HUMAN	sp|P08559|ODPA_HUMAN				0	0	0	0	0	0	0	0	0	0	0	0	0	0	0	0	0	0	0	0	0	0	0	0	0	0	0	0	0	0	0	0	0	0	0	0	0	0	0	0	0	0	0	0	0
sp|P08571|CD14_HUMAN	sp|P08571|CD14_HUMAN	+			0	0	0	0	0	0	0	0	0	0	0	0	0	0	0	0	0	0	0	0	0	0	0	0	0	0	0	0	0	0	0	0	0	0	0	0	0	0	0	0	0	0	0	0	0
sp|P08670|VIME_HUMAN	sp|P08670|VIME_HUMAN				0	0	0	0	0	0	0	0	0	0	0	0	0	0	3441800	0	0	0	7890800	0	2921700	4519200	37030000	0	0	126010000	0	0	0	0	0	0	0	0	0	0	0	0	0	0	0	0	0	0	0
sp|P08708|RS17_HUMAN	sp|P08708|RS17_HUMAN				28464000	0	0	0	0	0	0	0	3865100	5273100	3940900	0	7697700	6002600	0	0	1411100	0	0	0	0	0	0	3102300	0	0	0	0	0	0	0	0	14544000	0	5368000	2433800	0	0	0	3145900	0	0	0	0	7480900
sp|P08758|ANXA5_HUMAN	sp|P08758|ANXA5_HUMAN				0	0	0	0	0	0	0	0	0	0	0	0	0	0	0	0	0	0	0	0	0	0	0	0	0	0	0	0	0	0	0	0	0	0	0	0	0	0	0	0	0	0	0	0	0
sp|P08865|RSSA_HUMAN	sp|P08865|RSSA_HUMAN				0	10823000	0	0	0	0	0	0	0	0	0	0	5189400	5147700	0	0	0	0	0	0	0	0	0	6625300	0	0	0	0	0	0	0	0	0	0	0	0	0	0	0	6326100	0	0	4820600	0	0
sp|P09211|GSTP1_HUMAN	sp|P09211|GSTP1_HUMAN				0	0	0	0	0	0	0	0	3895200	0	0	0	0	0	0	0	7213300	0	0	0	0	0	0	0	0	0	0	0	0	0	0	0	74726000	56874000	0	81561000	59217000	0	0	0	0	0	0	0	0
sp|P09228|CYTT_HUMAN	sp|P09228|CYTT_HUMAN				0	0	0	0	0	0	0	0	0	0	0	0	0	0	0	0	0	0	0	0	0	0	0	0	0	0	0	0	0	0	0	0	0	0	0	0	0	0	0	0	0	0	0	0	0
sp|P09429|HMGB1_HUMAN;sp|B2RPK0|HGB1A_HUMAN;sp|P26583|HMGB2_HUMAN;sp|P23497|SP100_HUMAN	sp|P09429|HMGB1_HUMAN;sp|B2RPK0|HGB1A_HUMAN				0	0	0	0	7856100	0	0	0	0	0	0	0	0	0	0	0	0	0	0	0	0	0	0	0	0	0	0	0	0	0	0	0	0	0	0	0	0	0	0	0	0	0	0	0	0
sp|P09543|CN37_HUMAN	sp|P09543|CN37_HUMAN				4116400	0	0	0	0	0	0	0	0	0	496630	0	5290300	8242100	0	0	6176200	2310800	2996800	5182700	635230	0	0	0	3154500	0	0	0	0	0	0	5079200	0	0	0	0	0	2199400	0	0	0	2692700	1632200	0	5448600
sp|P09622|DLDH_HUMAN	sp|P09622|DLDH_HUMAN				0	0	0	0	0	0	0	0	0	0	0	0	1300700	0	0	0	0	0	0	0	0	0	0	0	0	0	0	0	0	0	0	0	0	0	0	0	0	0	0	0	0	0	0	0	0
sp|P09651|ROA1_HUMAN;sp|Q32P51|RA1L2_HUMAN	sp|P09651|ROA1_HUMAN;sp|Q32P51|RA1L2_HUMAN				0	8728800	0	0	0	3229200	0	0	3303400	0	0	0	0	0	2374500	0	4894800	0	0	3002600	0	0	5315800	1432700	4080400	0	0	0	0	0	0	0	0	0	0	0	0	5037900	0	3472200	2504500	0	0	0	0
sp|P09661|RU2A_HUMAN	sp|P09661|RU2A_HUMAN				3832400	2957900	0	0	0	0	0	0	0	0	0	0	0	0	0	0	0	0	0	0	0	0	0	0	0	0	0	0	0	0	0	0	0	0	0	0	0	0	0	0	0	0	0	0	0
sp|P09874|PARP1_HUMAN	sp|P09874|PARP1_HUMAN				78432000	30035000	96197000	85010000	80896000	102230000	95871000	65886000	0	188870000	17126000	151840000	295730000	292580000	39057000	89078000	47471000	105200000	105660000	85410000	127970000	54145000	61639000	152580000	77454000	125760000	33912000	0	86946000	39282000	6265100	128160000	92636000	71100000	183590000	0	35628000	197880000	45188000	230830000	103250000	63762000	252230000	74845000	112700000
sp|P09884|DPOLA_HUMAN	sp|P09884|DPOLA_HUMAN				0	0	0	0	0	0	1654200	0	0	0	0	0	0	0	0	0	0	2337600	0	0	0	0	0	1419700	0	0	0	0	0	0	0	0	0	0	0	0	0	0	0	0	0	0	0	0	0
sp|P09936|UCHL1_HUMAN	sp|P09936|UCHL1_HUMAN				0	0	0	0	0	0	0	0	0	0	0	0	0	0	0	0	0	0	0	0	0	0	0	6899200	3767900	0	0	0	0	0	0	0	0	0	0	0	0	0	0	0	0	0	0	0	0
sp|P0C842|CJ052_HUMAN	sp|P0C842|CJ052_HUMAN	+			0	0	0	0	0	0	0	0	0	0	0	0	0	0	0	0	0	0	0	0	0	0	0	0	0	0	0	0	0	0	0	0	0	0	0	0	0	0	0	0	0	0	0	0	0
sp|P0DJD0|RGPD1_HUMAN;sp|P0DJD1|RGPD2_HUMAN	sp|P0DJD0|RGPD1_HUMAN;sp|P0DJD1|RGPD2_HUMAN				0	0	0	0	0	0	0	0	0	0	0	0	0	0	0	0	0	0	0	0	0	0	0	0	0	0	0	0	0	0	0	0	0	0	0	0	0	0	0	0	178160	0	0	0	0
sp|Q5DJT8|CT452_HUMAN;sp|P0DMV2|CT459_HUMAN;sp|P0DMV1|CT458_HUMAN;sp|P0DMU9|CT45A_HUMAN;sp|Q8NHU0|CT453_HUMAN;sp|Q5HYN5|CT451_HUMAN;sp|P0DMV0|CT457_HUMAN;sp|P0DMU8|CT455_HUMAN;sp|P0DMU7|CT456_HUMAN	sp|Q5DJT8|CT452_HUMAN;sp|P0DMV2|CT459_HUMAN;sp|P0DMV1|CT458_HUMAN;sp|P0DMU9|CT45A_HUMAN;sp|Q8NHU0|CT453_HUMAN;sp|Q5HYN5|CT451_HUMAN;sp|P0DMV0|CT457_HUMAN;sp|P0DMU8|CT455_HUMAN;sp|P0DMU7|CT456_HUMAN				0	0	0	0	0	0	0	0	0	0	0	0	0	0	0	0	0	0	0	0	0	0	0	0	0	0	0	0	0	0	0	0	25043000	26631000	0	33737000	18307000	0	5672000	0	0	13830000	0	0	21380000
sp|P0DMV9|HS71B_HUMAN;sp|P0DMV8|HS71A_HUMAN	sp|P0DMV9|HS71B_HUMAN;sp|P0DMV8|HS71A_HUMAN				960640000	1394700000	1460400000	801310000	880340000	2073200000	2534000000	1800700000	639940000	167120000	162170000	613540000	290290000	243300000	1370500000	822760000	1587800000	808770000	2345100000	1726400000	6337200000	4723000000	7713600000	5076400000	5530500000	6511300000	290010000	268310000	1054900000	629790000	383760000	657310000	1775300000	1303600000	784210000	2803100000	3061600000	854330000	1461000000	192880000	902730000	1790700000	156020000	709030000	1204600000
sp|Q01081|U2AF1_HUMAN;sp|P0DN76|U2AF5_HUMAN;sp|Q8WU68|U2AF4_HUMAN	sp|Q01081|U2AF1_HUMAN;sp|P0DN76|U2AF5_HUMAN				11331000	0	0	0	0	0	0	0	0	1718900	0	0	3175400	0	0	0	0	0	0	0	0	0	3586100	0	0	0	0	0	0	0	0	0	0	0	3947900	0	0	3423600	2179900	4646100	0	0	0	0	8758300
sp|P35520|CBS_HUMAN;sp|P0DN79|CBSL_HUMAN	sp|P35520|CBS_HUMAN;sp|P0DN79|CBSL_HUMAN				1651200	0	0	0	0	0	0	0	0	0	0	0	0	855140	0	0	0	0	0	0	0	0	0	0	0	0	0	0	0	0	0	0	0	0	0	0	0	0	0	0	0	0	455790	0	0
sp|P0DOY3|IGLC3_HUMAN;sp|P0DOY2|IGLC2_HUMAN;sp|P0CF74|IGLC6_HUMAN;sp|P0CG04|IGLC1_HUMAN;sp|B9A064|IGLL5_HUMAN;sp|A0M8Q6|IGLC7_HUMAN	sp|P0DOY3|IGLC3_HUMAN;sp|P0DOY2|IGLC2_HUMAN;sp|P0CF74|IGLC6_HUMAN;sp|P0CG04|IGLC1_HUMAN;sp|B9A064|IGLL5_HUMAN				0	0	0	0	0	0	0	0	0	0	0	0	0	0	0	0	0	0	0	0	0	0	0	0	0	0	0	0	0	0	0	0	0	0	0	0	0	0	0	0	0	0	0	0	0
sp|P10071|GLI3_HUMAN	sp|P10071|GLI3_HUMAN				0	0	0	0	0	0	0	0	0	0	0	0	0	0	0	0	0	0	0	0	0	0	0	0	0	0	0	0	0	0	0	0	0	0	0	0	0	0	0	0	0	0	0	0	0
sp|P10114|RAP2A_HUMAN	sp|P10114|RAP2A_HUMAN	+			0	0	0	0	0	0	0	0	0	0	0	0	0	0	0	0	0	0	0	0	0	0	0	0	0	0	0	0	0	0	0	0	0	0	0	0	0	0	0	0	0	0	0	0	0
sp|P10244|MYBB_HUMAN	sp|P10244|MYBB_HUMAN				0	0	0	0	0	0	0	0	0	0	0	0	0	0	0	0	0	0	0	0	0	0	0	0	0	0	0	0	0	0	0	0	0	0	0	0	0	0	0	0	0	0	0	0	0
sp|P10321|1C07_HUMAN;sp|Q31612|1B73_HUMAN;sp|Q29963|1C06_HUMAN;sp|Q29960|1C16_HUMAN;sp|Q07000|1C15_HUMAN;sp|P30508|1C12_HUMAN;sp|P30501|1C02_HUMAN;sp|Q95604|1C17_HUMAN	sp|P10321|1C07_HUMAN;sp|Q31612|1B73_HUMAN;sp|Q29963|1C06_HUMAN;sp|Q29960|1C16_HUMAN;sp|Q07000|1C15_HUMAN;sp|P30508|1C12_HUMAN;sp|P30501|1C02_HUMAN;sp|Q95604|1C17_HUMAN				2119400	0	0	0	0	0	0	0	0	0	687770	0	1829500	1718000	0	0	0	0	0	0	0	0	0	0	0	0	0	0	0	0	0	0	0	0	592330	0	0	0	0	0	0	0	0	0	0
sp|P10398|ARAF_HUMAN	sp|P10398|ARAF_HUMAN				0	0	0	0	0	0	0	0	0	0	0	0	0	0	0	0	0	0	0	0	0	0	0	0	0	0	0	0	0	0	0	0	0	0	0	0	0	0	0	0	0	0	0	0	0
sp|P10412|H14_HUMAN;sp|Q02539|H11_HUMAN;sp|P22492|H1T_HUMAN	sp|P10412|H14_HUMAN				3071500000	4353700000	1000300000	1225000000	4908500000	360890000	239540000	2762600000	494170000	2036100000	2628500000	562180000	3714600000	965110000	668350000	1414400000	166610000	1545900000	936370000	164630000	1422400000	1196100000	396500000	2109300000	827850000	470370000	1032400000	2123000000	505790000	1465600000	1443600000	276110000	2767500000	2665200000	1994000000	3997900000	2761400000	4727500000	1071100000	7186700000	385100000	1526200000	5545000000	445880000	3289200000
sp|P10599|THIO_HUMAN	sp|P10599|THIO_HUMAN				9336400	0	0	0	2610500	0	0	0	2776000	2451000	1319400	2240400	2710300	3665900	0	0	4953500	0	0	0	0	0	0	0	0	0	0	0	0	0	0	0	5527900	0	0	0	0	0	0	0	2881800	5245500	0	0	0
sp|P10636|TAU_HUMAN	sp|P10636|TAU_HUMAN				0	0	0	0	0	0	0	0	0	0	0	0	0	0	0	0	0	0	0	0	0	0	0	0	0	0	0	0	0	0	0	0	0	0	0	0	0	0	0	0	0	0	0	0	0
sp|P10809|CH60_HUMAN	sp|P10809|CH60_HUMAN				140650000	160870000	4698800	8402600	96248000	35735000	23363000	19897000	73663000	32835000	21278000	19458000	31009000	11796000	5244000	0	144770000	0	10498000	54579000	35475000	66121000	64379000	114570000	246940000	139210000	20363000	11885000	32904000	12539000	0	0	113840000	23005000	12797000	97775000	10098000	38690000	34808000	46776000	29292000	26360000	9250300	20117000	197260000
sp|P10909|CLUS_HUMAN	sp|P10909|CLUS_HUMAN				0	0	0	0	0	0	0	0	0	0	0	0	0	0	0	0	0	0	0	0	0	0	0	0	0	0	0	0	0	0	0	0	0	0	0	0	0	0	0	0	0	0	0	0	0
sp|P11021|GRP78_HUMAN	sp|P11021|GRP78_HUMAN				16312000	99146000	15502000	30469000	24888000	0	9887100	4017000	18166000	14577000	4142600	0	16188000	10666000	11514000	0	4480600	4674700	0	6201800	13563000	0	0	29173000	56740000	7252100	0	0	0	4132400	0	0	6290400	0	0	4465800	0	14229000	0	4411000	0	0	2928600	5350900	7981200
sp|P11142|HSP7C_HUMAN	sp|P11142|HSP7C_HUMAN				59558000	200640000	169230000	74913000	123300000	140130000	238260000	318120000	100720000	23070000	26062000	49045000	83092000	55641000	269190000	130050000	222750000	151160000	367740000	463470000	751200000	442320000	754000000	744070000	778860000	662620000	4958000	16503000	93414000	120410000	21708000	25465000	0	0	69035000	70635000	61310000	223180000	49315000	54521000	83380000	10860000	25175000	88976000	19435000
sp|P11171|41_HUMAN	sp|P11171|41_HUMAN				42440000	70718000	166460000	167990000	127810000	309000000	294940000	297490000	40059000	26923000	6933400	248880000	39322000	75361000	744090000	388580000	603770000	353470000	555220000	644430000	319430000	194480000	299410000	242520000	111920000	138370000	260590000	70375000	438120000	461000000	123290000	269820000	6237900	6350800	68395000	0	0	0	5868900	0	130150000	90267000	56755000	527520000	4594300
sp|P11177|ODPB_HUMAN	sp|P11177|ODPB_HUMAN				0	0	0	0	0	0	0	0	0	0	0	0	2191100	1351100	0	0	0	0	0	0	0	0	3488600	2207100	0	0	0	0	0	0	0	0	0	0	0	0	0	0	0	0	0	0	0	0	0
sp|P11182|ODB2_HUMAN	sp|P11182|ODB2_HUMAN				0	0	0	0	0	0	0	0	0	0	0	0	0	0	0	0	0	0	0	0	0	0	0	153280	0	821230	0	0	0	0	0	0	0	0	0	0	0	0	0	0	0	0	0	0	0
sp|P11234|RALB_HUMAN;sp|P11233|RALA_HUMAN	sp|P11234|RALB_HUMAN				0	0	0	0	0	0	0	0	0	0	0	0	0	0	0	0	2566600	0	0	0	0	0	0	0	0	0	0	0	0	0	0	0	0	0	0	0	0	0	0	0	0	0	0	0	0
sp|P11274|BCR_HUMAN	sp|P11274|BCR_HUMAN				0	0	14468000	11240000	41270000	32644000	11887000	52082000	713090000	460370000	786770000	231430000	217980000	179630000	283050	699940	0	2327500	6782100	0	44704000	6257700	14669000	15280000	0	4747300	217770	0	8778200	0	0	6173500	14684000	0	3085700	0	0	0	9410500	30921000	41267000	18667000	0	4951300	0
sp|P11310|ACADM_HUMAN	sp|P11310|ACADM_HUMAN				0	0	0	0	0	0	0	0	0	0	2525700	0	10016000	15196000	0	0	0	0	0	0	0	0	0	0	0	0	0	0	0	0	0	0	0	0	0	0	0	0	0	0	0	0	0	0	0
sp|P11387|TOP1_HUMAN;sp|Q969P6|TOP1M_HUMAN	sp|P11387|TOP1_HUMAN				23985000	4161900	28970000	57596000	33437000	0	0	20989000	0	66176000	5045100	9026500	72864000	105500000	8223700	15863000	22749000	24840000	0	15007000	65778000	6748800	8563300	49119000	0	14369000	1650200	27463000	50955000	4348200	0	3189400	13727000	9595200	95027000	60777000	2400900	151350000	19806000	122020000	5610300	33078000	70970000	13010000	43826000
sp|P11388|TOP2A_HUMAN	sp|P11388|TOP2A_HUMAN				0	0	0	0	0	0	0	0	0	0	0	0	0	0	0	0	0	0	0	0	0	0	0	943110	0	0	0	0	0	0	0	0	0	0	0	0	0	0	0	0	0	0	0	0	0
sp|P11441|UBL4A_HUMAN	sp|P11441|UBL4A_HUMAN				0	0	0	0	0	0	0	0	0	0	0	0	0	0	0	0	0	0	0	0	0	0	0	0	0	0	0	0	0	0	0	0	0	0	0	0	0	0	0	0	0	0	0	0	0
sp|P11498|PYC_HUMAN	sp|P11498|PYC_HUMAN				166690000	4223400000	22424000000	18290000000	10150000000	8877500000	8240900000	8891600000	495070000	8505600000	7231700000	6661500000	12032000000	13892000000	6209100000	14077000000	11322000000	17851000000	10250000000	11754000000	12954000000	15544000000	4638800000	20323000000	35776000000	6962600000	6808300000	7633200000	10391000000	14291000000	16047000000	13915000000	8749500000	9132900000	24533000000	1335400000	13886000000	23562000000	8628100000	26820000000	6516100000	9306400000	33156000000	15835000000	7821800000
sp|P11532|DMD_HUMAN	sp|P11532|DMD_HUMAN				0	0	8064700	0	0	0	0	0	14114000	0	0	0	0	0	0	0	0	0	6085800	0	0	0	0	0	0	0	0	0	0	0	0	0	0	0	0	0	0	29818000	0	0	0	0	0	5061900	0
sp|P11586|C1TC_HUMAN	sp|P11586|C1TC_HUMAN				0	0	3111300	18948000	33589000	2496100	11695000	45857000	0	0	0	0	19188000	26646000	7570200	27550000	53391000	25227000	22048000	37472000	44917000	8561600	28684000	44654000	12433000	20755000	3428500	0	37906000	8996100	0	39460000	25753000	0	8089500	0	0	0	41521000	6468600	25904000	57123000	0	13123000	12887000
sp|P11678|PERE_HUMAN	sp|P11678|PERE_HUMAN				0	0	0	0	0	0	0	0	0	0	0	0	0	0	0	0	0	0	0	0	0	0	0	0	0	116850000	0	0	0	0	0	0	0	0	0	0	0	0	0	0	0	0	0	0	0
sp|P11717|MPRI_HUMAN	sp|P11717|MPRI_HUMAN				232490000	237830000	92795000	15271000	105420000	236120000	135230000	199830000	263200000	44189000	40945000	379200000	28485000	100940000	397010000	253330000	467350000	182130000	254470000	349170000	296170000	126180000	248230000	113390000	102470000	106890000	68536000	101240000	340210000	134730000	44438000	204600000	136290000	18368000	34355000	8835000	6820700	0	123220000	10095000	107910000	200830000	0	110820000	17423000
sp|P11940|PABP1_HUMAN;sp|Q9H361|PABP3_HUMAN;sp|Q4VXU2|PAP1L_HUMAN;sp|Q96DU9|PABP5_HUMAN	sp|P11940|PABP1_HUMAN				1470200	11060000	3439200	0	0	0	5594100	0	4996500	0	4264700	0	3917100	3109200	0	0	5075600	0	0	9781700	0	0	0	1669100	0	0	0	0	0	3956700	0	0	0	0	0	0	0	0	21541000	0	0	4849000	0	2296000	0
sp|P12004|PCNA_HUMAN	sp|P12004|PCNA_HUMAN				0	0	0	0	4955900	0	0	0	0	3243800	0	0	6579600	0	0	0	0	0	0	0	0	0	0	4887100	1750800	0	0	0	0	0	0	0	0	0	0	0	0	0	0	7584600	0	0	0	0	0
sp|P12235|ADT1_HUMAN	sp|P12235|ADT1_HUMAN				0	0	0	0	0	0	0	0	0	0	0	0	0	0	0	0	0	0	0	0	0	0	0	1703500	3313200	4004500	0	0	0	0	0	0	0	0	0	0	0	0	0	0	0	0	0	0	6398200
sp|P12236|ADT3_HUMAN	sp|P12236|ADT3_HUMAN				23954000	21094000	25056000	37132000	22158000	28467000	58822000	14318000	10849000	10928000	7390700	19152000	5714800	27188000	28428000	28170000	17124000	37038000	28599000	17552000	19830000	23849000	33542000	19428000	97466000	104420000	41764000	6519200	15556000	0	6930500	20440000	0	22998000	27869000	0	0	0	0	13396000	32307000	0	5888700	27291000	63312000
sp|P12268|IMDH2_HUMAN;sp|P20839|IMDH1_HUMAN	sp|P12268|IMDH2_HUMAN				0	0	0	0	0	0	0	0	0	0	0	0	0	0	0	0	0	0	0	0	0	0	0	0	0	0	0	0	0	0	0	0	0	0	0	0	0	4138300	0	0	0	0	0	0	0
sp|P12270|TPR_HUMAN	sp|P12270|TPR_HUMAN				1273600000	823960000	289290000	589340000	849660000	1021800000	1039900000	983800000	1256600000	964890000	802840000	1178300000	1519800000	1664700000	605610000	1390800000	860650000	1260800000	1045600000	1013300000	807670000	761480000	678670000	1032000000	1043300000	1071400000	470420000	643720000	410660000	461180000	717120000	320430000	128760000	105660000	599160000	43425000	9361800	32341000	132620000	593070000	379930000	266540000	657440000	771790000	248960000
sp|P12273|PIP_HUMAN	sp|P12273|PIP_HUMAN				0	0	0	0	0	0	0	0	0	0	0	0	0	0	0	0	0	0	0	0	0	0	0	0	0	1831100	0	0	0	0	0	0	0	0	3839500	0	0	3880900	0	0	0	0	0	76530000	0
sp|P12277|KCRB_HUMAN	sp|P12277|KCRB_HUMAN				0	4563100	0	0	8731700	0	0	0	0	0	0	0	2722600	3559400	0	0	32593000	0	0	0	0	0	0	1652600	0	0	0	0	0	0	0	0	0	0	0	0	0	0	0	8766800	0	0	3982300	0	0
sp|P12532|KCRU_HUMAN;sp|P17540|KCRS_HUMAN	sp|P12532|KCRU_HUMAN				0	7257100	0	0	0	3334700	0	0	4072400	0	0	0	0	0	0	0	0	0	0	0	0	0	6138400	873640	0	0	0	0	0	0	0	0	0	0	0	0	0	0	0	0	0	0	0	0	0
sp|P12814|ACTN1_HUMAN	sp|P12814|ACTN1_HUMAN	+			0	0	0	0	0	0	0	0	0	0	0	0	0	0	0	0	0	0	0	0	0	0	0	0	0	0	0	0	0	0	0	0	0	0	0	0	0	0	0	0	0	0	0	0	0
sp|P12931|SRC_HUMAN;sp|P07947|YES_HUMAN;sp|Q9H3Y6|SRMS_HUMAN;sp|P42685|FRK_HUMAN;sp|P08581|MET_HUMAN;sp|Q04912|RON_HUMAN	sp|P12931|SRC_HUMAN;sp|P07947|YES_HUMAN				0	0	0	0	0	0	0	0	0	0	0	0	0	0	0	0	0	0	0	0	0	0	0	0	0	0	0	0	0	0	0	0	0	0	0	0	0	0	0	0	0	0	0	0	0
sp|P12955|PEPD_HUMAN	sp|P12955|PEPD_HUMAN				0	0	0	0	0	0	0	0	0	0	0	0	0	0	0	0	0	0	0	0	0	0	0	0	0	0	0	0	0	0	0	0	0	0	0	0	0	0	0	0	0	0	0	0	0
sp|P12956|XRCC6_HUMAN	sp|P12956|XRCC6_HUMAN				0	4046600	0	0	0	0	0	0	0	0	0	0	0	0	0	0	0	0	0	0	0	0	0	0	0	0	0	0	0	0	0	0	8203200	0	0	0	0	0	0	0	0	0	0	0	0
sp|P13010|XRCC5_HUMAN	sp|P13010|XRCC5_HUMAN				0	0	0	0	2830800	0	0	0	0	0	0	0	0	0	0	0	5480900	0	0	0	0	0	0	0	0	0	0	0	1921400	0	0	0	0	0	0	0	0	2936900	0	0	0	0	0	0	0
sp|P13073|COX41_HUMAN	sp|P13073|COX41_HUMAN				0	0	0	0	0	0	0	0	0	0	0	0	0	0	0	0	0	0	0	0	0	0	0	0	0	0	0	0	0	0	0	0	0	0	0	0	0	0	0	0	0	0	0	0	0
sp|P13639|EF2_HUMAN	sp|P13639|EF2_HUMAN				135190000	35023000	48533000	64076000	113120000	41699000	47010000	78108000	0	4503700	0	67637000	27719000	45899000	78376000	72254000	189720000	61800000	19263000	96968000	126490000	159610000	72861000	228400000	41148000	118720000	34098000	24837000	123030000	59715000	3750700	4988300	50495000	0	74838000	27927000	11235000	3074700	50143000	57909000	47474000	82781000	13894000	102410000	16852000
sp|P13667|PDIA4_HUMAN	sp|P13667|PDIA4_HUMAN				0	31499000	0	0	3286900	0	0	0	0	0	0	0	0	0	0	0	0	0	0	0	14510000	0	0	8806600	13729000	0	0	0	0	0	0	0	0	0	0	0	0	0	0	0	0	0	0	0	0
sp|P13797|PLST_HUMAN;sp|P13796|PLSL_HUMAN	sp|P13797|PLST_HUMAN				11288000	46966000	4510700	0	0	8381400	17221000	8571900	0	0	0	0	0	0	6010300	0	11174000	0	6016700	4454700	12468000	9595400	4240200	6592000	2194600	0	0	2804800	7617200	2818100	2794400	2604300	0	0	0	0	0	0	0	2736000	7088200	0	4087100	0	0
sp|P13804|ETFA_HUMAN	sp|P13804|ETFA_HUMAN				0	0	3368100	6123500	2862500	11384000	18299000	7539500	0	856170	1636600	11765000	0	0	3546100	0	2120800	0	0	1876300	8127900	36458000	57807000	28889000	212050000	83431000	0	2109400	0	0	0	0	1993700	0	3457800	0	0	0	0	0	0	0	0	5290300	0
sp|P13861|KAP2_HUMAN	sp|P13861|KAP2_HUMAN				115400000	61334000	45946000	55173000	2297700	47680000	84205000	37301000	9435500	0	18926000	21489000	46411000	28308000	57139000	5734700	26842000	6571400	89674000	66892000	45694000	28150000	29285000	23410000	16462000	6533600	104820000	55283000	73220000	101990000	69825000	87015000	0	5653000	112100000	0	0	71139000	72458000	81767000	229530000	40640000	35922000	128850000	0
sp|P13995|MTDC_HUMAN	sp|P13995|MTDC_HUMAN				0	0	0	0	0	0	0	0	0	0	0	0	0	2272600	0	0	0	0	0	0	0	0	0	0	0	2746900	0	0	0	0	0	0	0	0	0	0	0	0	0	0	0	0	0	0	0
sp|P14174|MIF_HUMAN	sp|P14174|MIF_HUMAN				0	0	0	0	0	0	0	0	3233900	0	0	0	1760000	920510	0	0	13692000	0	0	2425900	0	0	0	0	0	0	0	0	0	0	0	0	0	0	0	0	0	0	0	3054700	0	0	0	0	0
sp|P14209|CD99_HUMAN	sp|P14209|CD99_HUMAN				3287300	0	0	0	3998700	0	0	7422100	0	783790	1612000	0	0	0	620240	0	975150	0	0	0	0	1356700	0	0	0	0	999210	0	0	1644000	0	0	0	0	0	0	0	0	0	0	0	0	3071200	0	0
sp|P14618|KPYM_HUMAN;sp|P30613|KPYR_HUMAN	sp|P14618|KPYM_HUMAN				13199000	9889900	0	3822900	5992300	0	0	6569600	13114000	0	0	0	0	0	0	0	36769000	0	0	464450	127160	0	0	21793000	0	5628700	0	0	6367500	0	0	0	0	0	0	0	0	8141500	0	0	0	3983600	0	0	0
sp|P14625|ENPL_HUMAN;sp|Q58FF3|ENPLL_HUMAN	sp|P14625|ENPL_HUMAN				13343000	0	0	2354700	21544000	0	0	0	0	1682800	0	0	0	2999800	0	0	53942000	0	0	0	0	5024000	0	60868000	11645000	38531000	0	0	11197000	0	0	0	0	0	0	0	0	0	0	17577000	0	0	3926700	0	5178400
sp|P14635|CCNB1_HUMAN	sp|P14635|CCNB1_HUMAN				0	0	0	0	0	0	0	0	0	0	0	0	0	0	0	0	0	0	0	0	0	0	0	0	0	0	0	0	0	0	0	0	0	0	0	0	0	0	0	0	0	0	0	0	0
sp|P14859|PO2F1_HUMAN;sp|Q9UKI9|PO2F3_HUMAN;sp|P09086|PO2F2_HUMAN	sp|P14859|PO2F1_HUMAN;sp|Q9UKI9|PO2F3_HUMAN;sp|P09086|PO2F2_HUMAN				0	0	0	0	0	0	0	0	0	0	0	0	0	0	0	0	0	0	0	0	0	0	0	0	0	0	0	0	0	0	0	0	0	0	0	0	0	0	0	0	0	0	0	0	0
sp|P14923|PLAK_HUMAN	sp|P14923|PLAK_HUMAN				0	0	0	0	0	0	0	975360	0	0	0	0	0	0	0	0	0	0	0	0	0	0	0	1087600	0	0	0	0	0	0	0	0	0	0	0	0	0	0	0	0	972890	0	0	0	0
sp|P15056|BRAF_HUMAN	sp|P15056|BRAF_HUMAN				0	0	0	0	0	0	0	0	0	0	0	0	0	0	64177000	88683000	69343000	0	0	0	0	0	0	0	0	0	0	0	0	0	0	0	0	0	0	0	0	0	0	0	0	0	0	0	0
sp|P15170|ERF3A_HUMAN;sp|Q8IYD1|ERF3B_HUMAN	sp|P15170|ERF3A_HUMAN;sp|Q8IYD1|ERF3B_HUMAN				0	0	0	0	0	0	0	0	0	0	0	0	0	0	0	0	0	0	0	0	0	0	0	0	0	0	0	0	0	0	0	0	0	0	0	0	0	0	0	0	0	0	0	0	0
sp|P15260|INGR1_HUMAN	sp|P15260|INGR1_HUMAN				0	0	0	0	0	0	0	0	0	0	0	0	0	0	0	3735100	0	0	0	0	0	0	0	0	0	0	0	0	0	0	0	0	0	0	6509100	0	0	0	0	0	0	0	0	0	0
sp|P15311|EZRI_HUMAN	sp|P15311|EZRI_HUMAN				14644000	2857300	2651000	3843000	0	6626200	11417000	8823600	0	1503200	0	0	0	0	48105000	7422700	36767000	0	5307100	47080000	13283000	0	6400300	4309200	6721300	0	6635000	0	3219600	6877900	4621300	0	4358200	0	0	0	0	0	4414200	0	3781700	0	6371300	15333000	0
sp|P15531|NDKA_HUMAN	sp|P15531|NDKA_HUMAN				0	0	0	0	0	7526000	0	13949000	8481400	0	8462500	8844700	0	4686500	0	0	9860000	0	6106400	0	0	4098700	0	0	0	0	0	6528700	0	0	0	0	0	0	5972000	0	0	0	0	0	0	0	7088300	0	0
sp|P15822|ZEP1_HUMAN	sp|P15822|ZEP1_HUMAN				0	0	0	0	0	0	0	0	0	0	0	0	0	0	0	0	0	0	0	0	0	0	0	0	0	0	0	0	0	0	0	0	0	0	0	0	0	0	0	0	0	0	0	0	0
sp|P15880|RS2_HUMAN	sp|P15880|RS2_HUMAN				192530000	107770000	18629000	49510000	65441000	37824000	53966000	58704000	117430000	88996000	79079000	117070000	122540000	28301000	47617000	47699000	27016000	58957000	44154000	24602000	40776000	28416000	91533000	48872000	15487000	59545000	20559000	22346000	42131000	5650300	16964000	42302000	121860000	116930000	124340000	111890000	54339000	168370000	29710000	371670000	30885000	27238000	222720000	14064000	227470000
sp|P15918|RAG1_HUMAN	sp|P15918|RAG1_HUMAN	+			0	0	0	0	0	0	0	0	0	0	0	0	0	0	0	0	0	0	0	0	0	0	0	0	0	0	0	0	0	0	0	0	0	0	0	0	0	0	0	0	0	0	0	0	0
sp|P15924|DESP_HUMAN	sp|P15924|DESP_HUMAN				0	0	4194500	4854400	2461100	23888000	62854000	64195000	0	0	0	0	1585300	0	1701400	3092400	10370000	32787000	33616000	59907000	58279000	16492000	76740000	66732000	7579600	24330000	0	0	65566000	4487200	0	86089000	0	0	11904000	0	0	0	7623100	4487600	102690000	15712000	0	40104000	0
sp|P16152|CBR1_HUMAN	sp|P16152|CBR1_HUMAN				0	0	15245000	11189000	0	5154400	0	0	0	210060000	184780000	0	246670000	790830000	0	0	0	0	0	0	0	0	0	0	0	0	0	0	0	0	0	0	0	0	14099000	0	0	27620000	0	141170000	0	0	19359000	0	0
sp|P16333|NCK1_HUMAN	sp|P16333|NCK1_HUMAN				0	3723200	0	0	0	18290000	841060	16582000	8706900	0	4299700	6563600	0	5312100	5654700	0	0	0	3483800	0	5914600	0	15929000	2112200	0	0	0	7478500	4149700	0	2859000	0	0	0	0	0	0	0	0	2355100	6257500	0	22876000	0	0
sp|P16383|GCFC2_HUMAN	sp|P16383|GCFC2_HUMAN				0	0	0	0	0	0	0	0	0	0	0	0	0	0	0	0	0	0	0	0	0	0	0	0	0	0	0	0	0	0	0	0	0	0	0	0	0	0	0	0	0	0	0	0	0
sp|P16401|H15_HUMAN	sp|P16401|H15_HUMAN				9522300	0	0	5311500	29545000	0	0	9451400	0	3928300	5742100	0	4363800	0	0	0	0	0	0	0	0	0	0	8325000	0	22471000	0	0	0	0	0	0	10966000	0	0	20452000	20137000	0	10785000	8383600	0	20889000	11545000	0	0
sp|P16403|H12_HUMAN	sp|P16403|H12_HUMAN				0	0	0	0	0	0	0	0	0	45137000	73505000	0	74219000	0	0	0	0	0	0	0	10111000	6808500	0	22115000	0	0	0	0	0	6215100	0	0	32607000	41735000	0	69846000	63117000	0	16081000	238530000	0	50567000	239400000	0	24624000
sp|P16435|NCPR_HUMAN	sp|P16435|NCPR_HUMAN				46730000	7133300	2684200	1613600	0	0	0	0	0	0	0	0	0	0	7676600	0	1825400	3440500	0	4718700	5796800	0	0	3500100	657440	0	0	0	0	0	0	0	0	0	0	0	0	0	0	0	0	0	0	0	0
sp|P16615|AT2A2_HUMAN;sp|O14983|AT2A1_HUMAN;sp|Q93084|AT2A3_HUMAN	sp|P16615|AT2A2_HUMAN				197900000	661100000	57852000	169670000	121790000	1873800	27168000	118590000	3548000	117230000	0	0	171120000	208810000	85960000	260010000	104530000	240500000	104500000	140540000	132800000	35876000	102740000	276000000	6598500	328190000	129160000	16035000	122060000	17045000	22760000	171290000	262130000	249370000	45157000	185360000	313660000	0	160350000	7976000	58861000	239740000	0	60720000	291290000
sp|P16949|STMN1_HUMAN;sp|Q9H169|STMN4_HUMAN	sp|P16949|STMN1_HUMAN				29337000	13166000	0	8274900	16511000	6571000	4981100	35641000	1712400	3946900	5660700	956790	0	0	0	0	11081000	0	15231000	9271200	0	4114100	12412000	0	3013300	8904300	2796500	15784000	0	6498400	5507800	3874800	2922900	0	10927000	0	0	0	0	0	873690	17986000	2140100	677240	0
sp|P17029|ZKSC1_HUMAN	sp|P17029|ZKSC1_HUMAN				0	0	0	0	0	0	0	0	0	0	0	0	0	0	0	0	0	0	0	0	0	0	0	0	0	0	0	0	0	0	0	0	0	0	0	0	0	0	0	0	0	0	0	0	0
sp|P17066|HSP76_HUMAN;sp|P48741|HSP77_HUMAN	sp|P17066|HSP76_HUMAN				76881000	145470000	111940000	56399000	0	116030000	133770000	138890000	60132000	23624000	29063000	37457000	46177000	29806000	97912000	53057000	82820000	52218000	136560000	103750000	927940000	239150000	404830000	1210600000	324740000	510070000	51775000	24177000	96048000	78437000	28812000	42787000	110570000	75149000	68364000	231860000	252440000	230210000	95308000	41244000	59826000	152820000	16372000	49704000	85404000
sp|P17301|ITA2_HUMAN	sp|P17301|ITA2_HUMAN				0	0	0	0	0	0	0	0	0	0	0	0	0	0	0	0	0	0	0	0	0	0	0	0	0	0	0	0	0	0	0	0	0	0	0	0	0	0	0	0	0	0	0	0	0
sp|P17302|CXA1_HUMAN	sp|P17302|CXA1_HUMAN				0	0	0	0	0	0	0	0	0	0	0	0	0	0	0	0	0	0	0	0	0	0	0	0	0	0	0	0	0	0	0	0	0	0	0	0	0	0	0	0	0	0	0	0	0
sp|P17480|UBF1_HUMAN	sp|P17480|UBF1_HUMAN				8945200	0	0	0	0	0	0	0	0	8771900	0	0	10372000	11194000	0	0	0	0	0	0	0	0	0	0	0	0	0	0	0	0	0	0	16575000	0	0	22115000	13004000	0	0	0	0	11124000	0	0	0
sp|P17482|HXB9_HUMAN	sp|P17482|HXB9_HUMAN				3271600	0	0	0	0	0	0	0	0	1258500	0	0	1139300	0	0	0	0	0	0	0	0	0	1030100	0	0	0	0	0	0	0	0	0	0	0	0	0	0	0	0	0	0	1707500	0	0	0
sp|P17706|PTN2_HUMAN	sp|P17706|PTN2_HUMAN				0	0	0	0	0	0	0	0	0	0	0	0	0	0	0	0	0	0	0	0	0	0	0	0	0	0	0	0	0	0	0	0	0	0	0	0	0	0	0	0	0	0	0	0	0
sp|P17812|PYRG1_HUMAN;sp|Q9NRF8|PYRG2_HUMAN	sp|P17812|PYRG1_HUMAN				77771000	20755000	14635000	10925000	0	15478000	18353000	10889000	0	0	0	0	0	0	19100000	0	0	1994600	0	21561000	2141400	4747500	0	64422	0	0	7853700	0	2828100	16107000	0	0	11475000	0	0	0	0	0	29211000	0	11478000	5672700	1330900	40817000	14316000
sp|P17844|DDX5_HUMAN	sp|P17844|DDX5_HUMAN				4000000	2674800	0	0	0	0	0	0	0	0	0	0	0	0	0	0	0	0	0	0	0	0	0	0	0	0	0	0	0	0	0	0	0	0	0	0	0	0	0	0	0	0	0	0	0
sp|P17931|LEG3_HUMAN	sp|P17931|LEG3_HUMAN				0	0	0	0	0	0	0	0	0	0	0	0	0	0	0	0	0	0	0	0	0	0	0	0	0	0	0	0	0	0	0	0	0	0	0	0	0	0	0	0	0	0	0	0	0
sp|P17980|PRS6A_HUMAN	sp|P17980|PRS6A_HUMAN				0	0	0	0	0	0	0	0	0	0	0	0	0	0	0	0	0	0	0	0	0	0	0	561710	0	0	0	0	0	0	0	0	0	0	0	0	0	0	0	0	0	0	0	0	0
sp|P17987|TCPA_HUMAN	sp|P17987|TCPA_HUMAN				80327000	34673000	0	28746000	3195500	16374000	38168000	29333000	56577000	57062000	10060000	9997300	50901000	46656000	26712000	73443000	34079000	36837000	13260000	33991000	35712000	4710000	14513000	56064000	10058000	49000000	3836200	0	8818700	0	0	0	54758000	30855000	0	82732000	21697000	24879000	5357400	8419000	0	2415100	0	4214400	81705000
sp|P18031|PTN1_HUMAN	sp|P18031|PTN1_HUMAN				89860000	81907000	122950000	134450000	77860000	180710000	239920000	197810000	119640000	0	17850000	112350000	128720000	112540000	273900000	82129000	256270000	69504000	245970000	144720000	124480000	158980000	202460000	75365000	86213000	75417000	220290000	136370000	228990000	243690000	139510000	235680000	78495000	64573000	398220000	30218000	24929000	109430000	174590000	149150000	460520000	112090000	216060000	317080000	28243000
sp|P18077|RL35A_HUMAN	sp|P18077|RL35A_HUMAN				0	0	0	0	0	0	0	0	4466000	0	0	0	0	0	0	0	3744000	0	0	0	0	0	0	0	0	0	0	0	0	0	0	0	0	0	0	0	0	0	0	0	0	0	0	0	0
sp|P18085|ARF4_HUMAN	sp|P18085|ARF4_HUMAN				0	0	0	0	0	0	0	0	2474900	2643800	0	0	0	2900800	0	0	4091600	0	0	0	0	0	1856000	0	0	0	0	0	0	0	0	1200800	0	0	0	0	0	0	0	0	0	0	0	0	0
sp|P18124|RL7_HUMAN	sp|P18124|RL7_HUMAN				0	2255600	0	0	5579300	0	0	0	6490400	1870700	4662600	0	0	0	0	0	1654000	0	0	0	0	0	0	3540600	0	0	0	0	0	0	0	0	0	0	0	0	0	0	0	6963500	0	0	12717000	0	0
sp|P18206|VINC_HUMAN	sp|P18206|VINC_HUMAN				12236000	312490000	184170000	67969000	5910500	63444000	11984000	41088000	0	31431000	482020000	97243000	0	241750000	110440000	36833000	53817000	79864000	33714000	23610000	26443000	0	14268000	0	19908000	0	176330000	0	17314000	16012000	528350000	16332000	168640000	0	77617000	462680000	453780000	33392000	186750000	60339000	187030000	169390000	897460000	32508000	0
sp|P18564|ITB6_HUMAN	sp|P18564|ITB6_HUMAN				0	0	9832300	7496800	7310900	0	10934000	16228000	0	0	0	0	0	0	18077000	14839000	14696000	10774000	17487000	21756000	9067700	4219000	11765000	7965300	0	10221000	10804000	0	11060000	14276000	0	15330000	0	0	4423100	0	0	0	0	0	3333300	19538000	2726400	5070000	0
sp|P18583|SON_HUMAN	sp|P18583|SON_HUMAN				7323100	199390000	282360000	444000000	500210000	183690000	345970000	117450000	94204000	154770000	119590000	12260000	236820000	259750000	177610000	485340000	110730000	569420000	230660000	166600000	173840000	10576000	88371000	512440000	118290000	292450000	78796000	0	236030000	125790000	61904000	220740000	263810000	252170000	474690000	278300000	318230000	1150900000	70280000	235910000	162170000	89563000	100210000	411380000	141300000
sp|P18621|RL17_HUMAN	sp|P18621|RL17_HUMAN				217670000	133620000	161350000	175940000	260740000	99208000	126510000	114470000	183630000	330700000	332210000	192590000	409680000	474890000	145750000	340400000	97332000	391140000	163630000	128520000	196380000	101080000	201630000	183430000	101050000	228420000	124740000	123820000	100930000	115780000	133100000	126900000	371770000	246230000	242370000	616520000	400400000	283360000	122350000	449860000	179040000	258090000	342950000	130480000	399580000
sp|P18669|PGAM1_HUMAN;sp|P15259|PGAM2_HUMAN;sp|Q8N0Y7|PGAM4_HUMAN	sp|P18669|PGAM1_HUMAN;sp|P15259|PGAM2_HUMAN				0	0	0	0	2250600	0	0	0	1945200	0	0	0	0	0	0	0	0	0	0	0	0	0	0	2660700	0	0	0	1709500	0	0	0	0	0	0	0	0	0	0	0	0	0	0	0	0	0
sp|P19174|PLCG1_HUMAN	sp|P19174|PLCG1_HUMAN	+			0	0	0	0	0	0	0	0	0	0	0	0	0	0	0	0	0	0	0	0	0	0	0	0	0	0	0	0	0	0	0	0	0	0	0	0	0	0	0	0	0	0	0	0	0
sp|P19338|NUCL_HUMAN	sp|P19338|NUCL_HUMAN				17789000	34939000	11792000	29350000	61573000	24920000	28057000	27014000	0	0	0	47319000	0	790290	22056000	3618100	38421000	23860000	28569000	34590000	43414000	18363000	65642000	86213000	5214900	19126000	0	0	27963000	17013000	0	25345000	18487000	0	372680	0	0	7892000	0	6445100	10416000	0	0	4787000	0
sp|P19367|HXK1_HUMAN	sp|P19367|HXK1_HUMAN				0	638290000	1045100000	852380000	827560000	888510000	1349500000	1448900000	0	453470000	15080000	468660000	1008200000	1029900000	1011400000	951490000	1107000000	1237700000	1750000000	1470400000	1844900000	1471000000	1349400000	1092800000	1096600000	839160000	1660000000	754550000	1569700000	2971300000	1584400000	3167200000	757780000	374440000	2234600000	0	355030000	535420000	1104500000	908490000	1943500000	1229900000	1501500000	1493000000	580140000
sp|P19525|E2AK2_HUMAN	sp|P19525|E2AK2_HUMAN				0	0	0	0	0	0	0	0	0	0	0	0	0	0	0	0	0	0	0	0	0	0	0	0	0	0	0	0	0	0	0	0	0	0	0	0	0	0	0	0	0	0	0	0	0
sp|P19784|CSK22_HUMAN	sp|P19784|CSK22_HUMAN				19206000	0	0	0	0	0	0	0	0	0	0	0	0	5288600	0	0	0	0	0	0	0	0	0	0	0	0	0	0	0	0	0	0	0	0	0	0	0	0	0	0	0	0	0	0	0
sp|P20020|AT2B1_HUMAN;sp|Q01814|AT2B2_HUMAN	sp|P20020|AT2B1_HUMAN				0	0	5722100	7862300	27310000	47052000	6406100	38621000	0	0	0	0	0	0	40353000	28390000	25660000	5580900	12024000	23649000	5974300	0	0	25314000	0	0	6887300	0	19761000	11208000	0	60292000	0	0	0	0	0	0	0	0	0	0	0	12418000	0
sp|P20042|IF2B_HUMAN	sp|P20042|IF2B_HUMAN				0	0	0	0	0	0	0	0	0	0	0	0	0	0	0	0	0	0	0	0	0	0	0	0	0	0	0	0	0	0	0	0	0	0	0	0	0	0	0	0	0	0	0	0	0
sp|P20290|BTF3_HUMAN	sp|P20290|BTF3_HUMAN				0	0	0	0	0	0	0	0	0	0	0	0	0	0	0	0	0	0	0	0	33454	0	0	0	0	0	0	0	0	0	0	0	0	0	0	0	0	0	0	0	0	0	0	0	0
sp|P20336|RAB3A_HUMAN	sp|P20336|RAB3A_HUMAN				0	0	0	0	0	0	0	0	0	0	0	0	0	0	0	0	0	0	0	0	0	0	0	0	0	0	0	0	0	0	0	0	0	0	0	0	0	0	0	0	0	0	0	0	0
sp|P20337|RAB3B_HUMAN	sp|P20337|RAB3B_HUMAN				0	0	0	0	0	0	0	0	0	0	0	0	0	0	0	0	0	0	0	0	0	0	0	0	0	0	0	0	0	0	0	0	0	0	0	0	0	0	0	0	663470	0	0	0	0
sp|P20339|RAB5A_HUMAN	sp|P20339|RAB5A_HUMAN				1711400	1632400	0	0	2496800	0	0	3068.5	0	0	0	0	0	0	0	0	416030	0	0	0	3709600	0	3111300	4850800	0	0	0	0	0	0	0	0	0	0	0	0	0	0	0	0	0	0	0	0	2524100
sp|P20340|RAB6A_HUMAN	sp|P20340|RAB6A_HUMAN				5780200	20049000	157690000	122380000	67453000	112400000	105880000	88382000	74795000	32026000	41148000	85620000	55545000	27820000	55707000	12551000	46083000	18959000	78981000	26050000	14327000	70571000	137740000	2366400000	663660000	786810000	30542000	81437000	47422000	91037000	69125000	35660000	32427000	44280000	87736000	24061000	16519000	21306000	36058000	66601000	62116000	19263000	29867000	0	43408000
sp|P20700|LMNB1_HUMAN	sp|P20700|LMNB1_HUMAN				0	2404000	0	0	0	0	0	0	0	0	0	0	0	0	0	0	0	0	0	0	0	0	0	0	0	0	0	0	0	0	0	0	0	0	0	0	0	0	0	0	0	0	0	0	0
sp|P20810|ICAL_HUMAN	sp|P20810|ICAL_HUMAN				0	0	0	0	0	0	0	0	0	0	0	0	0	0	0	0	0	0	0	0	0	0	0	0	0	0	0	0	0	0	0	0	0	0	0	0	0	0	0	0	0	0	0	0	0
sp|P21127|CD11B_HUMAN;sp|Q9UQ88|CD11A_HUMAN;sp|Q13882|PTK6_HUMAN	sp|P21127|CD11B_HUMAN;sp|Q9UQ88|CD11A_HUMAN				0	3807700	0	0	0	0	0	388920	0	0	0	0	2652300	0	0	1976500	0	2222100	0	0	0	0	0	0	0	0	0	0	0	0	0	1918700	8442900	0	0	0	0	0	0	0	0	3040200	0	0	32085000
sp|P21333|FLNA_HUMAN	sp|P21333|FLNA_HUMAN				2991200000	2520300000	3195800000	2377400000	3354200000	4018300000	5525400000	1998100000	1673100000	1412600000	882890000	2167200000	2677200000	3278500000	4067000000	4409300000	6645000000	3054200000	3407700000	4250600000	8824900000	7192900000	3774300000	4373100000	7537200000	4857900000	2288000000	3814300000	3580800000	3847000000	6014600000	3607000000	1774500000	853340000	2492100000	458280000	514850000	522870000	1432400000	1961000000	1234300000	3496100000	4549600000	2752200000	93056000
sp|P21359|NF1_HUMAN	sp|P21359|NF1_HUMAN				0	0	0	0	0	0	2612900	0	0	0	0	0	0	0	23179000	18527000	8901300	0	0	2375800	0	0	1203600	4111100	0	3869100	0	0	9940400	0	0	4621800	0	0	0	0	0	0	0	0	1228400	0	0	0	0
sp|P21397|AOFA_HUMAN	sp|P21397|AOFA_HUMAN				0	1826300000	2783500000	16152000000	975410000	4740300000	6181300000	249230000	888600000	3090300000	4100400000	2365300000	2755900000	0	158960000	7706500000	2207600000	2729000000	813240000	1504400000	634440000	7892100000	913860000	1657500000	5396900000	419480000	1495200000	946020000	324980000	1318800000	843080000	2193500000	3811700000	4153300000	838120000	470740000	0	303240000	322530000	2548800000	562000000	695030000	3044700000	3748800000	17541000
sp|P21675|TAF1_HUMAN;sp|Q8IZX4|TAF1L_HUMAN	sp|P21675|TAF1_HUMAN;sp|Q8IZX4|TAF1L_HUMAN				0	0	0	0	0	0	0	0	0	0	0	0	0	0	0	0	0	0	0	0	0	0	0	0	0	0	0	0	0	0	0	0	0	0	0	0	0	0	0	0	0	0	0	0	0
sp|P21741|MK_HUMAN	sp|P21741|MK_HUMAN				0	0	0	0	0	0	0	0	0	0	0	0	0	0	0	0	0	0	0	0	0	0	0	0	0	0	0	0	0	0	0	0	0	0	0	0	0	0	0	0	0	0	0	0	0
sp|P21796|VDAC1_HUMAN	sp|P21796|VDAC1_HUMAN				0	0	0	0	0	10766000	14896000	0	0	0	0	0	0	0	0	0	0	0	0	0	0	0	9062300	0	0	0	0	0	0	0	0	0	0	0	0	0	0	0	0	0	0	21727000	0	0	0
sp|P22059|OSBP1_HUMAN	sp|P22059|OSBP1_HUMAN				0	0	0	0	0	0	0	0	0	0	0	0	0	0	0	0	0	0	0	0	0	0	0	0	0	0	0	0	0	0	0	0	0	0	0	0	0	0	0	0	0	0	0	0	0
sp|P22061|PIMT_HUMAN	sp|P22061|PIMT_HUMAN				0	0	0	444640000	0	11492000	0	0	447110000	0	0	0	0	0	0	0	0	0	0	0	21504000	18121000	0	0	0	0	0	72051000	100180000	0	0	0	0	0	0	0	0	0	0	0	0	0	0	20988000	0
sp|P22102|PUR2_HUMAN	sp|P22102|PUR2_HUMAN				0	0	0	0	0	5465400	0	6819600	0	0	0	0	0	0	0	4306300	3889700	0	0	4873400	6138900	10999000	0	19367000	24718000	6644100	0	0	3784700	0	0	4605500	3701500	0	0	0	0	0	3770400	0	3575100	0	0	3772100	0
sp|P22234|PUR6_HUMAN	sp|P22234|PUR6_HUMAN				9473200	7973800	0	0	3817000	0	0	3457200	2146100	0	1301100	0	2430600	0	0	0	4789400	0	615490	3211200	0	0	0	922740	0	0	0	0	0	1236400	0	0	0	0	0	0	0	0	0	4418200	1980700	2017900	3889000	0	0
sp|P22314|UBA1_HUMAN	sp|P22314|UBA1_HUMAN				0	0	0	0	3526000	4475100	0	2756900	0	0	0	0	0	0	0	0	14194000	0	0	5994000	5943200	0	2446100	7875600	0	1118800	0	0	8931000	0	0	3147600	0	0	0	0	0	0	0	0	0	0	0	0	0
sp|P22392|NDKB_HUMAN;sp|O60361|NDK8_HUMAN	sp|P22392|NDKB_HUMAN;sp|O60361|NDK8_HUMAN				8211000	0	0	16434000	19567000	62683000	47149000	45055000	10902000	9447400	10305000	3773300	15325000	21609000	6164800	0	57737000	0	8567300	16380000	0	10186000	15632000	6441200	0	6558600	13730000	37362000	0	22794000	31023000	11214000	7339000	0	13911000	0	0	0	18855000	10020000	14093000	0	18262000	0	0
sp|P22626|ROA2_HUMAN	sp|P22626|ROA2_HUMAN				1923500	9549300	0	0	9729600	0	0	0	0	0	0	0	0	2511500	0	0	3447200	0	0	0	0	0	4781800	0	0	3061300	0	0	0	0	0	0	0	0	0	0	0	0	0	3937000	0	0	0	0	0
sp|P22681|CBL_HUMAN	sp|P22681|CBL_HUMAN				0	0	0	0	0	1969600	10156000	8517500	0	0	0	0	0	0	5509400	2464400	2606600	0	6235900	10532000	8832900	3025100	0	0	0	0	1496300	0	7447000	5105000	0	9889700	0	0	7044200	0	0	0	0	0	12180000	0	0	6101900	0
sp|P22695|QCR2_HUMAN	sp|P22695|QCR2_HUMAN				0	0	0	0	0	0	0	0	0	0	0	0	0	0	0	0	0	0	0	0	0	0	0	0	0	0	0	0	0	0	0	0	0	0	0	0	0	0	0	0	0	0	0	0	0
sp|P23229|ITA6_HUMAN	sp|P23229|ITA6_HUMAN				0	0	0	0	0	0	0	0	0	0	0	0	0	0	0	0	0	0	0	0	0	0	0	0	0	0	0	0	0	0	0	0	0	0	0	0	0	0	0	0	0	0	0	0	0
sp|P23246|SFPQ_HUMAN	sp|P23246|SFPQ_HUMAN				0	0	0	0	0	0	0	0	0	0	0	0	0	0	0	0	7918400	0	0	0	0	0	0	22269000	0	0	0	0	0	0	0	0	0	0	0	0	0	0	0	0	0	0	0	0	0
sp|P23280|CAH6_HUMAN	sp|P23280|CAH6_HUMAN				0	0	0	0	0	0	0	0	0	0	0	0	0	0	0	0	0	0	0	0	0	0	0	0	0	0	0	0	0	0	0	0	0	0	0	0	0	0	0	0	0	0	0	0	0
sp|P23284|PPIB_HUMAN	sp|P23284|PPIB_HUMAN				0	2535400	0	1579100	7847800	0	0	0	5175700	2328100	3238600	0	3353500	3807300	0	0	6296300	0	0	1588500	0	0	20984000	2213700	7758300	16799000	0	0	0	0	0	1205700	1835600	0	2156500	0	0	3356300	0	5818700	0	0	4159900	0	0
sp|P23381|SYWC_HUMAN	sp|P23381|SYWC_HUMAN				5348700	0	0	0	0	3783900	4893900	3810800	0	0	0	0	0	0	6941700	0	9099600	0	0	5562400	1825700	0	2537200	0	0	0	0	0	0	0	0	0	0	0	4189300	0	0	1704900	0	1592800	0	0	7641900	0	0
sp|P23396|RS3_HUMAN	sp|P23396|RS3_HUMAN				583950000	243890000	77013000	120210000	177310000	109480000	108560000	130630000	174910000	204780000	159390000	183130000	357310000	159000000	123440000	103720000	80460000	121350000	114160000	71184000	44813000	57506000	188860000	113500000	38685000	190450000	75712000	3745400	82164000	0	2056500	50956000	387340000	340040000	129850000	395180000	214150000	74180000	73560000	298120000	81619000	82705000	184520000	48774000	738560000
sp|P23458|JAK1_HUMAN;sp|O60674|JAK2_HUMAN	sp|P23458|JAK1_HUMAN				0	0	0	6514200	2280100	0	0	0	0	0	0	0	4563400	6413800	1186800	8342000	0	17039000	0	3689800	6403400	0	0	0	0	7134700	3932900	0	2594100	0	0	14931000	0	4160600	2934700	0	0	0	0	0	2604100	0	0	0	4141700
sp|P23526|SAHH_HUMAN	sp|P23526|SAHH_HUMAN				0	0	0	0	0	0	0	0	0	0	0	0	0	0	0	0	0	0	0	0	0	0	0	0	0	0	0	0	0	0	0	0	0	0	0	0	0	0	0	0	0	0	0	0	0
sp|P23528|COF1_HUMAN;sp|Q9Y281|COF2_HUMAN	sp|P23528|COF1_HUMAN				0	4653400	0	5178600	8083700	0	3831000	7128400	8288600	0	0	0	0	4366900	0	0	8248100	0	0	0	8081400	0	21345000	5856000	7920200	17512000	0	0	0	0	0	2722400	0	0	0	0	0	0	0	3158200	0	0	0	0	16974000
sp|P23588|IF4B_HUMAN	sp|P23588|IF4B_HUMAN				16636000	0	17594000	7502400	0	17255000	15100000	23433000	0	18450000	8137000	0	10760000	16968000	65255000	6087600	28319000	11131000	16976000	22724000	10147000	3293800	24572000	5255900	4500100	0	19301000	10308000	12729000	30556000	12289000	9422900	0	4404300	11529000	0	0	0	8636000	7565400	10816000	10310000	16766000	45596000	0
sp|P23634|AT2B4_HUMAN	sp|P23634|AT2B4_HUMAN				0	0	633720	782860	0	0	0	0	0	0	0	0	0	0	0	0	0	0	0	0	0	0	0	0	0	0	0	0	0	0	0	0	0	0	0	0	0	0	0	0	0	0	0	950330	0
sp|P23786|CPT2_HUMAN	sp|P23786|CPT2_HUMAN				0	0	0	0	0	0	0	0	0	0	0	0	0	0	0	0	0	0	0	0	0	0	0	5658300	18396000	2246000	0	0	0	0	0	0	0	0	0	0	0	0	0	0	0	0	0	0	0
sp|P23921|RIR1_HUMAN	sp|P23921|RIR1_HUMAN				0	0	0	0	0	0	0	0	0	0	0	0	0	0	0	0	0	0	0	0	0	0	0	0	0	0	0	0	0	0	0	0	0	0	0	0	0	0	0	0	0	0	0	0	0
sp|P24386|RAE1_HUMAN	sp|P24386|RAE1_HUMAN				0	0	0	0	0	0	0	0	0	0	0	0	0	0	0	0	0	0	0	0	6367700	12872000	0	0	0	0	0	0	0	0	0	0	4427000	0	0	0	0	0	0	0	0	0	0	0	9102200
sp|P24468|COT2_HUMAN;sp|P10589|COT1_HUMAN;sp|P10588|NR2F6_HUMAN	sp|P24468|COT2_HUMAN;sp|P10589|COT1_HUMAN				0	0	0	0	0	0	0	0	0	0	0	0	0	0	0	0	0	0	0	0	0	0	0	109240	0	0	0	0	0	0	0	0	0	0	0	0	0	0	0	0	0	0	0	0	0
sp|P24534|EF1B_HUMAN	sp|P24534|EF1B_HUMAN				0	0	0	0	0	0	0	0	0	0	0	0	0	0	0	0	0	0	0	0	0	0	0	0	5252200	0	0	0	0	0	0	0	0	0	0	0	0	0	0	0	0	0	0	0	0
sp|P24539|AT5F1_HUMAN	sp|P24539|AT5F1_HUMAN	+			0	0	0	0	0	0	0	0	0	0	0	0	0	0	0	0	0	0	0	0	0	0	0	0	0	0	0	0	0	0	0	0	0	0	0	0	0	0	0	0	0	0	0	0	0
sp|P24723|KPCL_HUMAN	sp|P24723|KPCL_HUMAN				0	0	1250200	1297400	0	0	0	0	0	0	0	0	0	0	1536000	1198100	0	0	0	1576200	0	0	0	0	0	0	0	0	611320	0	0	0	0	0	0	0	0	0	0	0	0	0	1335800	2231100	0
sp|P24752|THIL_HUMAN	sp|P24752|THIL_HUMAN				0	0	0	0	2465400	25187000	3155900	14000000	35195000	0	3885400	25495000	13934000	19352000	7746000	0	17280000	9769800	5543300	13099000	1037400	0	3803300	2374600	32761000	5166100	6974400	0	0	0	0	9093900	0	0	0	0	0	8200900	0	2369600	9490100	0	4124300	0	0
sp|P24928|RPB1_HUMAN	sp|P24928|RPB1_HUMAN				0	0	20041000	53403000	59512000	21178000	13211000	6481300	8221100	169220000	61252000	3995300	145760000	145970000	0	29716000	1524700	50203000	35640000	11331000	92228000	1760400	0	143770000	33416000	62163000	0	0	44788000	0	0	27097000	65615000	55050000	13502000	55689000	8251300	18143000	11531000	31314000	2086100	11140000	18698000	3693300	7173800
sp|P25054|APC_HUMAN	sp|P25054|APC_HUMAN				0	0	0	0	0	5910700	4831400	0	0	0	0	0	0	0	0	0	0	0	0	0	0	0	0	0	0	0	0	0	1752300	0	0	0	0	0	0	0	0	0	0	0	759530	0	0	1649100	0
sp|P25098|ARBK1_HUMAN;sp|P35626|ARBK2_HUMAN	sp|P25098|ARBK1_HUMAN				0	0	0	0	0	0	0	0	0	0	0	0	0	0	1593700	1194300	1516100	0	0	1667600	0	0	0	0	0	0	0	0	0	0	0	0	0	0	0	0	0	0	0	0	0	0	0	2212300	0
sp|P25205|MCM3_HUMAN	sp|P25205|MCM3_HUMAN				2820300	0	0	5914100	0	0	0	2337500	0	5388500	0	0	9383600	3325600	0	23574000	5656300	16383000	0	3002500	6345000	0	1182700	2806200	0	0	0	0	3574100	0	0	4671500	25677000	0	0	4447200	0	0	39579000	0	2584100	42830000	0	0	17262000
sp|P25311|ZA2G_HUMAN	sp|P25311|ZA2G_HUMAN				0	0	0	0	0	0	0	0	0	0	0	0	0	0	0	0	0	0	0	0	0	0	0	0	0	0	0	0	0	0	0	0	0	0	0	0	0	0	0	0	0	0	0	0	0
sp|P25398|RS12_HUMAN	sp|P25398|RS12_HUMAN				8191000	0	0	3783200	7734500	0	1328700	4209500	7922900	6629000	3819400	3178600	7440000	12714000	0	0	8168200	0	2576600	4570700	0	0	6112800	0	0	7972900	0	0	0	0	0	0	11329000	0	0	0	0	0	6188200	0	0	0	0	0	12928000
sp|P25685|DNJB1_HUMAN	sp|P25685|DNJB1_HUMAN				0	0	0	0	1282300	4709900	0	1951000	0	0	823510	0	0	0	23709000	0	0	0	1491500	0	18378000	0	82977000	10066000	12739000	9061000	0	0	0	0	0	0	0	0	0	0	0	0	0	0	0	0	573140	0	0
sp|P25705|ATPA_HUMAN	sp|P25705|ATPA_HUMAN				32342000	65113000	0	0	0	0	0	0	18421000	9519300	8978300	9265100	20729000	10134000	0	0	52012000	0	4369000	12188000	3109700	6706200	0	21229000	30693000	12934000	4059100	0	3814800	0	0	0	15374000	7533100	0	0	0	13320000	13510000	15947000	0	17642000	2962800	0	7868700
sp|P25789|PSA4_HUMAN	sp|P25789|PSA4_HUMAN				0	0	0	0	0	2583300	0	3390700	0	0	0	0	0	0	0	0	0	0	0	0	0	0	4116000	0	0	0	0	0	0	0	0	0	0	0	0	0	0	0	0	0	0	0	0	0	0
sp|P26038|MOES_HUMAN	sp|P26038|MOES_HUMAN				0	6702200	0	0	0	0	0	0	0	0	0	0	0	0	0	0	0	0	0	0	0	0	0	0	0	0	0	0	0	0	0	0	0	0	0	0	0	0	0	0	0	0	0	0	0
sp|P26196|DDX6_HUMAN	sp|P26196|DDX6_HUMAN				0	0	0	0	0	0	0	0	0	0	0	0	0	0	0	0	0	0	0	0	2830500	0	0	2838600	0	0	0	0	0	0	0	0	0	0	0	0	0	0	0	0	0	0	0	0	0
sp|P26358|DNMT1_HUMAN	sp|P26358|DNMT1_HUMAN				0	0	0	0	0	0	0	0	0	0	0	0	0	0	0	0	0	0	0	0	0	0	0	0	0	0	0	0	0	0	0	0	0	0	0	0	0	0	0	0	0	0	0	0	0
sp|P26368|U2AF2_HUMAN	sp|P26368|U2AF2_HUMAN				0	3442700	0	0	0	0	0	0	0	0	0	0	0	0	0	0	0	0	0	0	0	0	0	0	0	0	0	0	0	0	0	0	0	0	0	0	0	0	0	0	0	0	0	0	0
sp|P26373|RL13_HUMAN	sp|P26373|RL13_HUMAN				311300000	492170000	194860000	145580000	668920000	105670000	82435000	410900000	216880000	524060000	491870000	165410000	800110000	270890000	106370000	168980000	79325000	161010000	151410000	92648000	128790000	158940000	199700000	223380000	178180000	311900000	84293000	350760000	94623000	133580000	306660000	82477000	219940000	204500000	431020000	404950000	267390000	1059100000	94886000	871860000	75092000	102990000	1409500000	73061000	396000000
sp|P26374|RAE2_HUMAN	sp|P26374|RAE2_HUMAN				2936900	0	0	0	0	0	0	6949100	0	0	0	0	0	0	0	0	5177100	0	0	950790	338680000	743050000	484650000	3224500	0	0	37178000	43455000	138950000	96645000	40294000	102520000	209010000	22253000	477080000	0	6579100	3552700	23264000	20697000	96832000	1915500	0	15584000	429440000
sp|P26599|PTBP1_HUMAN;sp|O95758|PTBP3_HUMAN	sp|P26599|PTBP1_HUMAN;sp|O95758|PTBP3_HUMAN				0	0	0	0	0	0	0	0	0	0	0	0	0	0	0	0	0	0	0	0	0	0	0	0	0	0	0	0	0	0	0	0	0	0	0	0	0	0	0	1560000	0	0	0	0	0
sp|P26639|SYTC_HUMAN	sp|P26639|SYTC_HUMAN				0	0	0	0	0	0	0	0	0	0	0	0	0	0	0	0	3486100	0	0	0	0	0	0	0	0	0	0	0	0	0	0	0	0	0	0	0	0	0	0	0	0	0	0	0	0
sp|P26641|EF1G_HUMAN	sp|P26641|EF1G_HUMAN				2726400	6220400	0	0	0	2144600	0	0	6610400	0	0	0	0	0	0	0	3807200	0	0	0	0	0	0	5888400	0	0	0	0	0	0	0	0	0	0	0	0	0	0	0	0	0	0	1778600	0	0
sp|P27105|STOM_HUMAN	sp|P27105|STOM_HUMAN				0	0	0	0	0	0	0	0	0	0	0	0	0	0	0	0	0	0	0	0	0	0	0	0	0	0	0	0	0	0	0	0	0	0	0	0	0	0	0	0	0	0	0	0	0
sp|P27348|1433T_HUMAN	sp|P27348|1433T_HUMAN				2348200	1186500	0	0	0	0	0	0	0	985870	525200	0	0	0	0	0	0	0	0	0	0	0	0	421650	0	0	0	0	0	0	0	0	0	0	0	2069500	0	0	0	0	0	14706000	0	0	0
sp|P27448|MARK3_HUMAN;sp|Q96L34|MARK4_HUMAN	sp|P27448|MARK3_HUMAN				0	0	0	0	0	0	0	0	0	0	0	0	0	0	0	0	0	0	0	0	0	0	0	0	0	0	0	0	0	0	0	0	0	0	0	0	0	0	0	0	0	0	0	802780	0
sp|P27482|CALL3_HUMAN	sp|P27482|CALL3_HUMAN				0	0	0	0	0	0	0	0	0	0	0	0	0	0	0	0	0	0	0	0	0	0	0	0	0	0	0	0	0	0	0	0	0	0	0	0	0	0	0	0	0	0	0	0	0
sp|P27544|CERS1_HUMAN	sp|P27544|CERS1_HUMAN				0	0	0	0	0	0	0	0	0	0	0	0	0	0	0	0	0	0	0	0	0	0	0	0	0	0	0	0	0	0	0	0	0	0	0	0	0	0	0	0	0	0	0	0	0
sp|P27635|RL10_HUMAN;sp|Q96L21|RL10L_HUMAN	sp|P27635|RL10_HUMAN				70237000	63147000	510190000	285870000	657570000	400600000	359090000	299770000	266560000	224560000	266930000	307080000	328300000	301640000	191240000	431680000	173860000	509090000	206470000	213300000	338870000	203200000	189740000	262530000	356300000	275270000	167580000	391050000	306800000	366720000	422520000	299980000	449970000	342970000	259470000	637910000	350600000	976340000	179140000	398060000	494850000	135480000	266190000	467000000	324030000
sp|P27694|RFA1_HUMAN	sp|P27694|RFA1_HUMAN				0	0	0	0	0	0	0	0	0	0	0	0	0	0	0	0	0	0	0	0	0	0	0	0	0	0	0	0	0	0	0	0	0	0	0	0	0	0	0	0	0	0	0	0	0
sp|P27708|PYR1_HUMAN	sp|P27708|PYR1_HUMAN				0	0	6163000	4502600	5161600	0	7488000	0	0	0	0	0	0	0	1152000	5453000	5678700	7128200	0	3171800	1794800	0	0	55124000	18647000	5154500	0	0	7209000	0	0	5426700	0	0	0	3489000	0	0	1268100	0	4324100	0	0	1597600	0
sp|P27816|MAP4_HUMAN	sp|P27816|MAP4_HUMAN				195430000	175350000	99462000	43695000	46121000	127030000	214570000	285300000	6254600	0	18362000	21357000	10459000	37241000	298200000	208590000	148780000	143030000	168020000	280620000	192180000	80977000	160300000	201630000	220950000	107550000	81767000	86251000	197410000	157220000	121580000	165470000	0	4701500	116950000	0	0	2717100	0	40542000	73053000	9955800	77226000	163510000	0
sp|P27824|CALX_HUMAN	sp|P27824|CALX_HUMAN				201190000	144150000	4928300	9973100	22808000	0	0	29786000	0	0	0	17734000	4145200	0	49603000	33073000	36075000	17103000	0	9034600	5948000	27883000	3483100	54859000	36446000	22900000	4184300	0	37846000	0	0	0	11879000	0	3892600	0	0	0	0	0	0	0	0	5841500	0
sp|P28066|PSA5_HUMAN	sp|P28066|PSA5_HUMAN				0	0	0	0	0	0	0	0	0	0	0	0	0	0	0	18986000	0	0	0	0	0	0	0	0	0	0	0	0	0	0	0	0	0	0	0	0	0	0	0	0	0	0	0	0	0
sp|P28288|ABCD3_HUMAN	sp|P28288|ABCD3_HUMAN				1046700000	2293200000	296870000	1445500000	492140000	327070000	598040000	499360000	456710000	767230000	507210000	209350000	963020000	819480000	869890000	1502600000	636930000	2538100000	1899800000	1027500000	680770000	407940000	918670000	1678900000	748000000	2477000000	2187500000	1722700000	513320000	1796000000	2315500000	956810000	1785900000	2245400000	1561800000	2093200000	1965000000	1250200000	3062000000	1003800000	793820000	2280200000	1146800000	842090000	1641000000
sp|P28325|CYTD_HUMAN	sp|P28325|CYTD_HUMAN	+			0	0	0	0	0	0	0	0	0	0	0	0	0	0	0	0	0	0	0	0	0	0	0	0	0	0	0	0	0	0	0	0	0	0	0	0	0	0	0	0	0	0	0	0	0
sp|P28331|NDUS1_HUMAN	sp|P28331|NDUS1_HUMAN	+			0	0	0	0	0	0	0	0	0	0	0	0	0	0	0	0	0	0	0	0	0	0	0	0	0	0	0	0	0	0	0	0	0	0	0	0	0	0	0	0	0	0	0	0	0
sp|P28340|DPOD1_HUMAN	sp|P28340|DPOD1_HUMAN				0	0	0	0	0	0	0	0	0	0	0	0	0	0	0	2661300	0	2547400	0	0	1260900	0	0	2302100	0	0	0	0	2238000	0	0	0	0	0	0	0	0	0	0	0	1722000	0	0	0	0
sp|P29317|EPHA2_HUMAN;sp|P54762|EPHB1_HUMAN;sp|P54760|EPHB4_HUMAN;sp|P54753|EPHB3_HUMAN;sp|P29323|EPHB2_HUMAN;sp|Q06187|BTK_HUMAN;sp|P29322|EPHA8_HUMAN	sp|P29317|EPHA2_HUMAN				0	0	0	2313300	941790	0	0	2379000	0	0	0	0	0	0	1411400	2701100	1655900	1863600	1590700	0	744170	0	0	739830	0	0	0	0	1644500	0	0	0	0	0	1039100	0	0	0	0	0	0	0	0	0	0
sp|P29320|EPHA3_HUMAN;sp|P54756|EPHA5_HUMAN	sp|P29320|EPHA3_HUMAN				0	0	0	0	0	0	0	2828000	0	0	0	0	0	0	0	0	0	0	3103300	4559200	0	0	0	0	0	0	0	0	0	0	0	3611800	0	0	0	0	0	0	0	0	0	0	0	0	0
sp|P29353|SHC1_HUMAN	sp|P29353|SHC1_HUMAN				0	0	0	0	0	0	0	0	0	0	0	0	0	0	0	0	0	0	0	0	0	0	0	0	0	0	0	0	0	0	0	0	0	0	0	0	0	0	0	0	0	0	0	0	0
sp|P29375|KDM5A_HUMAN	sp|P29375|KDM5A_HUMAN				0	0	0	0	0	0	0	0	0	0	0	0	0	0	0	1070800	0	2042000	0	1346700	0	0	1286800	0	0	1614800	0	0	0	0	0	0	0	0	0	0	0	0	0	0	0	0	0	0	0
sp|P29558|RBMS1_HUMAN;sp|Q15434|RBMS2_HUMAN;sp|Q6XE24|RBMS3_HUMAN	sp|P29558|RBMS1_HUMAN;sp|Q15434|RBMS2_HUMAN;sp|Q6XE24|RBMS3_HUMAN				0	0	0	0	0	0	0	0	0	0	0	0	0	0	0	0	0	0	0	0	0	0	0	0	0	0	0	0	0	0	0	0	0	0	0	0	0	0	0	0	0	0	0	0	0
sp|P29590|PML_HUMAN	sp|P29590|PML_HUMAN				0	0	0	0	0	0	0	0	0	0	0	0	0	0	0	0	0	0	0	0	0	0	0	0	0	0	0	0	0	0	0	0	0	0	0	0	0	0	0	0	0	0	0	0	0
sp|P29597|TYK2_HUMAN	sp|P29597|TYK2_HUMAN				0	0	12575000	26484000	11010000	9667300	4610700	5897400	0	19682000	0	0	5451600	24460000	0	20452000	0	35585000	9014400	9634900	41515000	2271400	7548700	19288000	0	11853000	2055400	0	13247000	0	0	56972000	0	2339300	0	0	0	0	0	0	0	0	0	4198500	0
sp|P29966|MARCS_HUMAN	sp|P29966|MARCS_HUMAN				11158000	17157000	0	0	8164000	0	299020	8260100	0	0	10216000	0	0	0	74965000	0	11017000	0	12226000	7631400	3621500	0	0	7000600	0	0	0	15925000	3827800	6991400	0	2509300	1195700	0	1541700	0	0	2871700	4606500	0	0	12443000	6139600	7962400	0
sp|P30040|ERP29_HUMAN	sp|P30040|ERP29_HUMAN				0	0	0	0	0	0	0	0	0	0	0	0	0	0	0	0	0	0	0	0	0	0	998480	950100	0	0	0	0	0	0	0	0	0	0	0	0	0	0	0	0	0	0	0	0	0
sp|P30041|PRDX6_HUMAN	sp|P30041|PRDX6_HUMAN				2389900	0	0	0	3072100	4167100	0	0	3524000	0	870250	0	2618000	0	0	0	0	0	0	0	0	0	0	2610500	0	0	0	0	3544000	0	0	0	4114500	0	2371200	0	0	0	0	2753400	0	0	0	0	0
sp|P30044|PRDX5_HUMAN	sp|P30044|PRDX5_HUMAN				0	0	0	0	0	0	0	0	0	0	0	0	0	0	0	0	0	0	0	0	0	0	0	0	0	0	0	0	0	0	0	0	0	0	0	0	0	0	0	0	0	0	0	0	0
sp|P30048|PRDX3_HUMAN	sp|P30048|PRDX3_HUMAN				2543800	0	5510900	3734100	2431600	15708000	23608000	2848000	5503200	0	1243900	2376100	1609200	0	0	0	2254200	0	0	0	2001200	4183200	15844000	0	5347100	6652900	0	2106900	0	0	3192100	2378600	0	0	4048000	0	0	1429400	0	1458100	19275000	0	0	16945000	1523100
sp|P30050|RL12_HUMAN	sp|P30050|RL12_HUMAN				8332600	0	0	0	3779700	0	0	0	1746600	0	0	0	0	0	0	0	5625900	0	0	0	0	0	0	0	0	0	0	0	0	0	0	0	0	0	0	0	0	0	0	0	0	0	0	0	0
sp|P30086|PEBP1_HUMAN	sp|P30086|PEBP1_HUMAN				0	0	0	0	0	0	0	0	0	0	0	0	0	0	0	0	0	0	0	0	0	0	0	0	0	0	0	0	0	0	0	0	0	0	0	0	0	0	0	0	0	0	0	0	0
sp|P30101|PDIA3_HUMAN	sp|P30101|PDIA3_HUMAN				0	0	0	0	433330	0	0	141300	0	0	0	0	0	0	0	0	0	0	0	0	0	0	0	0	0	0	0	0	188420	0	0	0	0	0	0	0	0	0	0	0	0	1077900	0	0	0
sp|P30153|2AAA_HUMAN;sp|P30154|2AAB_HUMAN	sp|P30153|2AAA_HUMAN;sp|P30154|2AAB_HUMAN				2681200	0	0	0	0	0	0	0	0	1657100	1413700	0	0	0	0	0	0	0	0	0	0	0	0	0	0	0	0	0	0	0	0	0	0	0	0	0	0	0	0	0	0	0	0	0	0
sp|P30405|PPIF_HUMAN	sp|P30405|PPIF_HUMAN				0	0	0	0	0	0	0	0	0	0	0	0	0	0	0	0	0	0	0	0	3861200	0	0	7024500	22481000	21818000	0	0	0	0	0	0	0	0	0	0	0	0	0	0	0	0	0	0	0
sp|P30414|NKTR_HUMAN	sp|P30414|NKTR_HUMAN				0	0	0	0	0	0	0	0	0	0	0	0	0	0	0	0	0	0	0	0	0	0	0	0	0	0	0	0	0	0	0	0	0	0	18850000	0	0	22555000	0	0	0	0	0	0	0
sp|P30419|NMT1_HUMAN;sp|O60551|NMT2_HUMAN	sp|P30419|NMT1_HUMAN				0	0	0	0	0	0	0	0	0	0	0	0	0	0	0	0	0	0	0	0	0	0	0	0	0	0	0	0	0	0	0	0	0	0	0	0	0	0	0	0	261390	0	0	236270	0
sp|P30519|HMOX2_HUMAN	sp|P30519|HMOX2_HUMAN				20267000	58250000	4064000	0	6974400	12230000	0	26514000	2519400	2367400	0	6461600	0	2227400	29622000	0	19052000	0	7025100	10011000	2217200	2249700	13184000	2786500	0	5348800	0	3873200	8128400	0	0	0	0	0	4890900	0	0	4895300	0	0	0	0	4519900	0	0
sp|P30825|CTR1_HUMAN	sp|P30825|CTR1_HUMAN				0	16520000	2722200	0	0	0	0	7042500	0	0	0	0	0	0	5188800	5191700	3738700	0	0	0	0	0	0	0	0	0	0	0	0	0	0	0	0	0	0	0	0	0	0	0	0	0	0	0	0
sp|P30837|AL1B1_HUMAN	sp|P30837|AL1B1_HUMAN				0	0	0	0	0	0	0	1159500	0	0	0	0	3706800	2168900	0	0	0	0	0	0	0	0	0	439370	0	1926800	1857800	0	0	0	0	0	0	0	0	0	0	0	0	0	2025900	0	0	0	0
sp|P30876|RPB2_HUMAN	sp|P30876|RPB2_HUMAN				0	0	0	6345200	5636600	0	3968100	1263900	0	3099400	0	0	13753000	1298500	0	0	0	4587400	0	0	12652000	0	2273400	37082000	32152000	28802000	0	0	849130	0	0	0	0	6128500	0	0	7723700	3589400	3675400	0	0	7250800	0	0	5274700
sp|P31025|LCN1_HUMAN;sp|Q5VSP4|LC1L1_HUMAN	sp|P31025|LCN1_HUMAN				0	0	0	0	0	0	0	0	0	0	0	0	0	0	0	0	0	0	0	0	0	0	0	0	0	213290000	0	0	0	0	0	0	0	0	31671000	0	0	35974000	0	0	0	0	0	0	0
sp|P31040|SDHA_HUMAN	sp|P31040|SDHA_HUMAN				0	0	0	0	0	0	0	0	0	0	0	0	0	0	0	0	0	0	0	0	0	0	0	5769600	43565000	6296400	0	0	0	0	0	0	0	0	0	0	0	0	0	0	0	0	0	0	0
sp|P31151|S10A7_HUMAN;sp|Q86SG5|S1A7A_HUMAN	sp|P31151|S10A7_HUMAN;sp|Q86SG5|S1A7A_HUMAN				0	0	0	0	0	0	0	0	0	0	0	0	0	0	0	0	0	0	0	0	0	0	0	0	0	0	0	0	0	0	0	0	0	0	0	0	0	0	0	0	0	0	0	0	0
sp|P31323|KAP3_HUMAN	sp|P31323|KAP3_HUMAN	+			0	0	0	0	0	0	0	0	0	0	0	0	0	0	0	0	0	0	0	0	0	0	0	0	0	0	0	0	0	0	0	0	0	0	0	0	0	0	0	0	0	0	0	0	0
sp|P31327|CPSM_HUMAN	sp|P31327|CPSM_HUMAN				0	0	0	0	0	0	0	0	0	0	0	0	0	0	0	0	0	0	0	0	0	0	0	0	2463300	0	0	0	0	0	0	0	0	0	0	0	0	0	0	0	0	0	0	0	0
sp|P31350|RIR2_HUMAN	sp|P31350|RIR2_HUMAN				0	0	0	0	0	0	0	0	0	0	0	0	0	0	0	0	0	0	0	0	0	0	0	0	0	0	0	0	0	0	0	0	0	0	0	0	0	0	0	0	0	0	914550	0	0
sp|P31641|SC6A6_HUMAN	sp|P31641|SC6A6_HUMAN				0	0	0	0	0	0	0	0	0	0	0	0	0	0	3266600	2311100	4496600	0	0	4245500	0	0	0	0	0	0	0	0	0	0	0	0	0	0	0	0	0	0	0	0	0	0	0	0	0
sp|P31689|DNJA1_HUMAN	sp|P31689|DNJA1_HUMAN				3091300	0	0	0	0	0	0	0	0	0	0	0	0	0	0	0	0	0	0	0	0	0	5558900	0	0	0	0	0	0	0	0	0	0	0	0	0	0	0	0	0	0	0	0	0	0
sp|P31939|PUR9_HUMAN	sp|P31939|PUR9_HUMAN				0	0	0	0	0	0	0	0	0	0	0	0	0	0	0	0	0	0	0	0	0	0	0	0	0	0	0	0	0	0	0	0	0	0	0	0	0	0	0	0	0	0	0	0	0
sp|P31943|HNRH1_HUMAN;sp|P55795|HNRH2_HUMAN	sp|P31943|HNRH1_HUMAN				2688500	0	0	0	0	0	0	0	0	0	0	0	1348000	0	0	0	5793200	0	0	0	0	0	0	431920	0	0	0	0	0	0	0	0	1220700	0	0	0	0	0	0	0	2069600	0	0	0	0
sp|P31944|CASPE_HUMAN	sp|P31944|CASPE_HUMAN				0	0	0	0	0	0	0	0	0	0	0	0	0	0	0	0	0	1856200	0	0	0	0	0	0	0	0	0	0	0	0	0	0	0	0	0	0	0	0	0	0	0	0	0	0	0
sp|P31946|1433B_HUMAN	sp|P31946|1433B_HUMAN				0	0	0	0	0	0	0	0	0	0	0	0	0	0	0	0	0	0	0	0	0	0	0	0	0	0	0	0	0	0	0	0	0	0	0	0	0	0	0	0	0	0	0	0	0
sp|P31947|1433S_HUMAN	sp|P31947|1433S_HUMAN				0	0	0	0	0	0	0	0	0	0	0	0	0	0	0	0	0	0	0	0	0	0	0	0	0	0	0	0	0	0	0	0	0	0	0	0	0	0	0	7046500	0	0	0	0	0
sp|P31948|STIP1_HUMAN	sp|P31948|STIP1_HUMAN				13946000	31747000	3412000	2481300	0	13269000	18166000	76576000	3342600	1355600	7013500	12212000	3376200	3351400	54476000	4918600	13364000	0	103110000	16049000	135220000	141450000	221900000	221280000	94077000	190770000	0	0	0	0	0	0	6563800	1134400	1899800	78024000	60328000	16579000	0	0	0	7755400	0	0	0
sp|P31949|S10AB_HUMAN	sp|P31949|S10AB_HUMAN				0	0	0	0	0	0	0	0	0	0	0	0	0	0	0	0	1248400	0	0	0	0	0	0	0	0	0	0	0	0	0	0	0	0	0	0	0	0	0	0	0	0	0	0	0	0
sp|P32019|I5P2_HUMAN	sp|P32019|I5P2_HUMAN				0	0	0	0	0	0	0	0	0	0	0	0	0	0	0	0	0	0	0	0	0	0	0	0	0	0	0	0	0	0	0	0	0	0	0	0	0	0	9012000	0	36441000	0	0	0	0
sp|P32119|PRDX2_HUMAN	sp|P32119|PRDX2_HUMAN				0	0	0	1501100	1293400	0	0	1671500	0	0	0	0	1689600	0	2959800	0	3171400	0	0	0	0	0	2064300	1429900	0	0	0	0	0	0	0	0	0	0	0	0	0	0	0	0	0	0	0	0	0
sp|P32121|ARRB2_HUMAN;sp|P49407|ARRB1_HUMAN	sp|P32121|ARRB2_HUMAN				9069500	0	0	14369000	0	5004600	5402700	0	0	0	0	0	8595100	0	0	0	0	4281500	0	0	15843000	0	7439200	11684000	0	5730400	0	0	0	0	0	0	13822000	0	0	20002000	19357000	0	0	0	0	15471000	0	0	0
sp|P32322|P5CR1_HUMAN	sp|P32322|P5CR1_HUMAN				0	0	0	0	0	0	0	0	0	0	0	0	0	0	0	0	0	0	0	0	0	0	0	13846000	11531000	6026200	0	0	0	0	0	0	0	0	0	0	0	0	0	3801100	0	0	0	0	0
sp|P32455|GBP1_HUMAN	sp|P32455|GBP1_HUMAN				0	0	0	0	0	0	0	0	0	0	0	0	0	0	0	0	0	0	0	0	0	0	0	0	0	0	0	0	0	0	0	0	0	0	0	0	0	0	0	0	0	9408300	0	0	0
sp|P32780|TF2H1_HUMAN	sp|P32780|TF2H1_HUMAN				1611700	0	0	0	0	0	0	1662800	0	5067100	0	0	4842000	0	0	1914500	0	5868500	0	0	455540	0	0	360960	0	2440500	0	0	0	0	0	0	12140000	3849900	0	9213800	5222600	0	5170000	0	0	0	0	0	4684200
sp|P32969|RL9_HUMAN	sp|P32969|RL9_HUMAN				0	0	0	0	0	0	0	0	0	0	0	0	0	0	0	0	0	0	0	0	0	0	0	0	0	0	0	0	0	0	0	0	0	0	0	0	0	0	0	0	0	0	0	0	0
sp|P33176|KINH_HUMAN	sp|P33176|KINH_HUMAN				0	0	7617600	0	0	21227000	5069600	10196000	0	0	0	3816900	0	0	2318000	6185500	9332700	3630500	22224000	20031000	35249000	8780200	14696000	3723000	4199100	0	10503000	0	20604000	16745000	0	39321000	4772300	0	2944000	0	0	0	21036000	0	90103000	2868800	9027300	21289000	0
sp|P33240|CSTF2_HUMAN	sp|P33240|CSTF2_HUMAN				0	0	0	0	0	0	0	0	0	0	0	0	0	0	0	0	0	0	0	0	0	0	0	0	0	0	0	0	0	0	0	0	0	0	0	0	0	0	0	0	0	0	0	0	0
sp|P33527|MRP1_HUMAN	sp|P33527|MRP1_HUMAN				0	0	0	0	0	0	0	2341600	0	0	0	0	0	0	0	0	0	0	0	0	0	0	0	0	0	0	0	0	0	0	0	0	0	0	0	0	0	0	0	0	0	0	0	0	0
sp|P33764|S10A3_HUMAN	sp|P33764|S10A3_HUMAN				0	0	0	0	0	0	0	0	0	0	0	0	0	0	0	0	0	0	0	0	0	0	0	0	0	0	0	0	0	0	0	0	0	0	0	0	0	0	0	0	0	0	0	0	0
sp|P33897|ABCD1_HUMAN	sp|P33897|ABCD1_HUMAN				0	0	0	0	0	0	0	0	0	0	0	0	0	0	0	0	0	0	0	0	0	0	0	0	0	0	0	0	0	0	0	0	0	0	0	0	0	0	0	0	0	0	0	0	0
sp|P33981|TTK_HUMAN	sp|P33981|TTK_HUMAN				4696500	0	50630000	40398000	23159000	48395000	43224000	73364000	0	46764000	22234000	0	45150000	41305000	50068000	29461000	42514000	23024000	6021800	45016000	6611500	25775000	1678500	0	0	2000300	6675600	11662000	39848000	21495000	0	2127100	11420000	0	13871000	0	2896000	0	44472000	16273000	56181000	45473000	11061000	65805000	0
sp|P33991|MCM4_HUMAN	sp|P33991|MCM4_HUMAN				0	0	0	0	0	0	0	0	0	0	0	0	0	0	0	1176300	1391700	0	0	0	0	0	0	0	0	0	0	0	0	0	0	0	0	0	0	0	0	0	0	0	0	0	0	0	0
sp|P33992|MCM5_HUMAN	sp|P33992|MCM5_HUMAN				0	0	0	0	0	0	0	0	0	0	0	0	0	0	0	0	0	0	0	0	0	0	0	0	0	0	0	0	0	0	0	0	0	0	0	0	0	0	0	0	0	0	0	0	0
sp|P33993|MCM7_HUMAN	sp|P33993|MCM7_HUMAN				0	0	0	0	0	0	0	0	0	0	0	0	0	0	0	3520300	0	2700800	0	0	0	0	0	0	0	0	0	0	0	0	0	0	0	0	0	0	0	0	3375200	0	0	0	0	0	0
sp|P34897|GLYM_HUMAN	sp|P34897|GLYM_HUMAN				0	0	0	0	0	5369300	0	9155700	0	0	0	0	0	0	0	0	0	0	0	0	0	0	0	3320600	6634400	0	0	0	0	0	0	0	0	0	0	0	0	0	0	0	0	0	0	0	0
sp|P34931|HS71L_HUMAN	sp|P34931|HS71L_HUMAN				0	0	0	0	0	0	0	0	0	0	0	0	0	0	0	0	0	0	0	0	0	0	0	0	0	0	0	0	839450	0	0	0	0	0	0	0	0	0	0	0	0	0	0	0	0
sp|P34932|HSP74_HUMAN	sp|P34932|HSP74_HUMAN				0	0	0	0	0	0	0	0	0	0	0	0	0	0	1959800	0	5419900	0	4001900	8235400	5756000	0	0	35519000	21872000	4420400	0	0	6817000	1899800	0	0	0	0	0	0	0	0	0	0	1914500	0	0	0	0
sp|P35030|TRY3_HUMAN	sp|P35030|TRY3_HUMAN				0	0	0	0	23611000	0	0	12352000	0	6826400	16769000	3223600	15757000	16019000	20607000	0	16878000	0	26527000	39862000	0	77861000	0	0	64832000	0	0	0	8854400	0	0	0	0	0	4506500	0	11350000	0	0	10171000	0	0	9229300	0	0
sp|P35080|PROF2_HUMAN	sp|P35080|PROF2_HUMAN				0	0	0	0	0	0	0	0	0	0	0	0	0	0	0	0	2659300	0	0	0	0	0	0	0	0	0	0	0	0	0	0	0	0	0	0	0	0	0	0	0	0	0	0	0	0
sp|P35221|CTNA1_HUMAN	sp|P35221|CTNA1_HUMAN				0	0	0	0	0	0	0	0	0	0	0	0	0	0	0	0	0	0	0	0	0	0	0	0	0	0	0	0	0	0	0	0	0	0	0	0	0	0	0	0	0	0	0	0	0
sp|P35222|CTNB1_HUMAN	sp|P35222|CTNB1_HUMAN	+			0	0	0	0	0	0	0	0	0	0	0	0	0	0	0	0	0	0	0	0	0	0	0	0	0	0	0	0	0	0	0	0	0	0	0	0	0	0	0	0	0	0	0	0	0
sp|P35232|PHB_HUMAN	sp|P35232|PHB_HUMAN				0	0	0	0	0	0	0	0	0	0	0	0	0	0	0	0	0	0	0	0	0	0	0	0	0	0	0	0	0	0	0	0	0	0	0	0	0	0	0	0	0	0	0	0	0
sp|P35240|MERL_HUMAN	sp|P35240|MERL_HUMAN				0	0	0	0	0	0	0	0	0	0	2016900	0	3200400	3450600	0	0	0	0	0	0	0	0	0	0	0	0	4093200	0	0	0	0	0	0	0	0	0	0	0	0	0	0	0	0	0	0
sp|P35241|RADI_HUMAN	sp|P35241|RADI_HUMAN				4636500	4858900	0	0	0	0	0	0	0	0	0	0	0	0	4729900	0	0	0	0	1904700	0	0	0	0	0	0	0	0	0	2897600	0	1256300	0	0	0	0	0	0	0	0	0	0	0	2253100	0
sp|P35251|RFC1_HUMAN	sp|P35251|RFC1_HUMAN				0	0	0	0	0	0	0	0	0	0	0	0	0	0	0	0	0	0	0	0	0	0	0	0	0	0	0	0	0	0	0	0	0	0	0	0	0	0	0	0	0	0	0	0	0
sp|P35268|RL22_HUMAN	sp|P35268|RL22_HUMAN				13985000	10465000	0	15559000	19550000	6761300	8788600	13434000	28618000	35004000	30763000	16819000	30576000	37035000	0	0	17942000	0	5700100	10426000	0	0	13584000	0	7904000	18384000	0	0	0	0	0	11921000	30781000	0	18535000	39384000	29408000	22491000	13429000	34593000	0	26290000	21475000	0	40350000
sp|P35269|T2FA_HUMAN	sp|P35269|T2FA_HUMAN				0	0	0	0	0	0	0	0	0	0	0	0	0	0	0	0	0	0	0	0	0	0	0	0	0	0	0	0	0	0	0	0	0	0	0	0	0	0	0	0	0	0	0	0	0
sp|P35527|K1C9_HUMAN;CON__P35527	sp|P35527|K1C9_HUMAN;CON__P35527			+	463900000	1514400000	1101900000	469550000	695120000	100170000	187710000	527160000	312110000	804940000	2994000000	143830000	719860000	2070500000	591820000	1241000000	287050000	1558700000	747890000	769570000	1298700000	618470000	349230000	943580000	549520000	878130000	323750000	325610000	350690000	1137700000	9659300	1310100000	862860000	616690000	1548900000	303720000	497160000	1636100000	218840000	754300000	1791100000	588640000	377390000	435340000	359020000
sp|P35579|MYH9_HUMAN;REV__sp|Q9UKV3|ACINU_HUMAN;sp|A7E2Y1|MYH7B_HUMAN	sp|P35579|MYH9_HUMAN				315530000	24594000	95512000	144490000	114660000	161300000	198020000	194020000	109350000	48247000	32625000	64077000	93972000	63862000	171700000	316070000	319190000	318830000	292120000	325410000	564690000	497900000	284800000	295240000	248950000	25252000	97087000	18774000	269300000	168820000	148430000	139660000	32164000	17324000	265820000	3916200	0	42162000	39005000	76244000	72714000	153100000	242930000	162100000	0
sp|P35580|MYH10_HUMAN	sp|P35580|MYH10_HUMAN				0	0	0	0	0	0	0	0	0	0	0	0	0	0	0	0	1723200	0	0	0	36700000	28207000	0	5449300	0	0	0	0	2434200	0	0	0	0	0	0	0	0	0	0	0	0	0	0	0	0
sp|P35606|COPB2_HUMAN	sp|P35606|COPB2_HUMAN				0	0	0	1029100	0	22370000	0	2579900	0	0	0	0	0	0	0	0	0	0	0	0	0	1040400	0	1845700	993750	0	0	0	703120	0	0	0	0	0	0	0	0	0	0	0	0	0	0	0	0
sp|P35610|SOAT1_HUMAN	sp|P35610|SOAT1_HUMAN				0	0	0	0	0	0	0	0	0	0	0	0	0	0	0	0	0	0	0	0	0	0	0	0	0	0	0	0	0	0	0	0	0	0	0	0	0	0	0	0	0	0	0	0	0
sp|P35611|ADDA_HUMAN	sp|P35611|ADDA_HUMAN				0	0	2079300	3129600	0	17232000	16479000	10360000	0	0	0	2437300	0	0	12667000	3345400	18512000	7424300	25022000	31150000	11224000	0	6094000	1866100	0	1376400	1048700	0	20450000	0	0	36145000	0	0	0	0	0	0	0	0	1385300	9012900	0	0	0
sp|P35613|BASI_HUMAN	sp|P35613|BASI_HUMAN				37035000	56497000	0	0	0	0	0	0	14843000	0	0	16123000	5070600	0	49005000	0	34469000	0	44144000	23814000	11218000	0	0	0	0	0	0	0	0	0	0	0	0	0	0	0	0	0	0	0	0	7846900	0	7484800	0
sp|P35638|DDIT3_HUMAN	sp|P35638|DDIT3_HUMAN	+			0	0	0	0	0	0	0	0	0	0	0	0	0	0	0	0	0	0	0	0	0	0	0	0	0	0	0	0	0	0	0	0	0	0	0	0	0	0	0	0	0	0	0	0	0
sp|P35658|NU214_HUMAN	sp|P35658|NU214_HUMAN				0	0	4361600	0	5422600	1699900	16507000	0	0	0	0	0	0	0	0	0	0	0	4600300	5414800	1273800	0	15907000	12167000	5189900	11375000	0	0	818410	2263700	0	682380	0	0	3541700	0	0	0	0	0	349590	0	0	1433000	0
sp|P35659|DEK_HUMAN	sp|P35659|DEK_HUMAN				3143100	0	0	0	0	0	0	0	0	0	0	0	5141900	0	0	0	0	0	0	0	0	0	0	0	0	0	0	0	0	0	0	0	0	0	0	0	0	13927000	0	11425000	0	0	9630600	0	0
sp|P35998|PRS7_HUMAN	sp|P35998|PRS7_HUMAN				0	0	0	0	0	0	0	0	0	0	0	0	0	1426600	0	0	0	0	0	0	0	0	0	0	0	0	0	0	0	0	0	0	0	0	0	0	0	0	0	0	0	0	1196600	0	0
sp|P36383|CXG1_HUMAN	sp|P36383|CXG1_HUMAN				0	0	0	0	0	0	0	0	0	0	0	0	0	0	0	0	0	0	0	0	0	0	0	0	0	0	0	0	0	0	0	0	0	0	0	0	0	0	0	0	0	0	0	0	0
sp|P36404|ARL2_HUMAN	sp|P36404|ARL2_HUMAN				0	0	0	0	0	0	0	0	0	0	0	0	0	0	0	0	0	0	0	0	0	0	0	0	0	0	0	0	0	0	0	0	0	0	0	0	0	0	0	0	0	0	0	0	0
sp|P36405|ARL3_HUMAN	sp|P36405|ARL3_HUMAN				1036700	0	0	0	0	3005900	0	2098800	0	0	0	0	0	0	0	0	1684600	0	1537600	915320	0	0	3102400	0	0	1452100	0	2674200	0	0	0	963790	0	0	0	0	0	0	0	0	0	0	0	0	0
sp|P36406|TRI23_HUMAN	sp|P36406|TRI23_HUMAN				0	0	0	0	0	0	496470	0	0	0	0	0	0	0	0	0	0	0	0	0	0	0	0	0	0	0	0	0	0	0	0	0	0	0	871460	0	0	0	0	0	2017400	0	0	0	0
sp|P36542|ATPG_HUMAN	sp|P36542|ATPG_HUMAN				262930000	122520000	51653000	59256000	58971000	53065000	101130000	56120000	71404000	37828000	34033000	78513000	238850000	13007000	85681000	150760000	64791000	129310000	74041000	74140000	88375000	8357200	117600000	10541000	13250000	80468000	142430000	0	33426000	0	0	44973000	126820000	88304000	52036000	105860000	36976000	3926100	42965000	64439000	71168000	76363000	28712000	31197000	524470000
sp|P36578|RL4_HUMAN	sp|P36578|RL4_HUMAN				37155000	23832000	0	2203800	11816000	0	1488100	0	9437400	0	4569400	0	5093700	4833600	0	0	0	0	0	0	0	0	0	6003100	3773500	0	0	0	0	0	0	0	0	0	0	0	0	11775000	0	27152000	0	5669300	22823000	0	0
sp|P36776|LONM_HUMAN	sp|P36776|LONM_HUMAN				0	0	0	2896400	0	0	0	0	0	701870	0	0	0	0	0	0	2055200	0	1039900	0	796340	0	1874500	23405000	26606000	4872900	0	0	474550	1030300	0	1387300	0	0	0	0	0	0	0	0	1103700	0	0	0	0
sp|P36873|PP1G_HUMAN;sp|P62136|PP1A_HUMAN	sp|P36873|PP1G_HUMAN;sp|P62136|PP1A_HUMAN				0	0	0	0	838640	0	0	0	0	723480	0	0	1618100	0	1481700	0	7248800	0	0	1694000	0	0	0	1121400	0	964490	0	0	0	0	0	0	0	0	0	0	0	0	0	0	1101700	0	0	0	0
sp|P36952|SPB5_HUMAN	sp|P36952|SPB5_HUMAN				0	0	0	0	0	0	0	0	0	0	0	0	0	0	0	0	0	0	0	0	0	0	0	0	0	0	0	0	0	0	0	0	0	0	0	0	0	0	0	0	0	0	0	0	0
sp|P37108|SRP14_HUMAN	sp|P37108|SRP14_HUMAN				0	0	0	0	0	0	0	0	0	0	0	0	0	0	0	0	0	0	0	0	0	0	0	0	0	0	0	0	0	0	0	0	0	0	0	0	0	0	0	0	0	0	0	0	0
sp|P37198|NUP62_HUMAN	sp|P37198|NUP62_HUMAN				0	0	0	0	0	0	0	0	0	0	0	0	0	0	0	0	872640	0	0	0	0	0	0	0	0	0	0	0	0	0	0	0	0	0	0	0	0	0	0	0	0	0	0	0	0
sp|P37275|ZEB1_HUMAN	sp|P37275|ZEB1_HUMAN				0	0	0	0	0	0	0	0	0	0	0	0	0	0	0	0	0	4888000	0	0	0	0	0	0	0	7974800	0	0	0	0	0	0	0	0	0	0	0	0	0	0	0	0	0	0	0
sp|P37802|TAGL2_HUMAN;sp|Q9UI15|TAGL3_HUMAN	sp|P37802|TAGL2_HUMAN				124500000	107710000	104570000	66889000	115080000	184800000	127460000	194900000	147840000	65598000	71208000	308930000	108250000	114040000	120510000	66703000	142460000	50790000	64874000	146020000	76140000	131390000	172810000	43570000	83042000	70330000	71006000	180850000	88479000	124420000	154640000	48976000	113870000	83424000	63279000	21302000	53740000	21421000	98528000	86761000	181640000	138860000	146500000	184220000	53201000
sp|P37840|SYUA_HUMAN	sp|P37840|SYUA_HUMAN				0	0	0	0	0	0	0	0	0	0	0	0	0	0	0	0	2040100	0	0	0	0	0	0	0	0	0	0	0	0	0	0	0	0	0	0	0	0	0	0	0	0	0	0	0	0
sp|P38398|BRCA1_HUMAN	sp|P38398|BRCA1_HUMAN				0	0	0	0	0	0	0	0	0	0	0	0	0	0	0	0	0	0	0	0	0	0	0	0	0	0	0	0	0	0	0	0	0	0	0	0	0	0	0	0	0	0	0	0	0
sp|P38432|COIL_HUMAN	sp|P38432|COIL_HUMAN				0	0	0	0	0	0	0	0	0	0	0	0	1859800	0	0	0	0	0	0	0	0	0	0	1088500	0	0	0	0	0	0	0	0	0	0	0	0	0	0	0	0	253910	0	0	1580800	0
sp|P38606|VATA_HUMAN	sp|P38606|VATA_HUMAN				0	0	0	0	0	0	0	0	0	0	0	0	0	0	0	0	0	0	0	0	0	0	0	0	0	0	0	0	0	0	0	0	0	0	0	0	0	0	0	0	0	0	0	0	0
sp|P38646|GRP75_HUMAN	sp|P38646|GRP75_HUMAN				14545000	33114000	9417100	8719400	13557000	0	20537000	2692500	1242400	6131200	4008800	0	7519800	3434100	3817200	0	0	2726700	0	9160200	17263000	27314000	45422000	105660000	542490000	282110000	13659000	0	0	19090000	0	0	0	0	0	0	0	1801400	0	2920000	4080000	0	2025300	12140000	0
sp|P38919|IF4A3_HUMAN	sp|P38919|IF4A3_HUMAN				0	0	0	0	0	0	0	0	0	0	0	0	0	0	0	0	0	0	0	0	0	0	0	0	0	0	0	0	0	0	0	0	0	0	0	0	0	0	0	858830	0	0	0	0	0
sp|P38935|SMBP2_HUMAN	sp|P38935|SMBP2_HUMAN				0	0	0	0	0	0	0	0	0	0	0	0	0	0	0	0	0	0	0	0	0	0	0	0	0	0	0	0	0	0	0	0	0	0	0	0	0	0	0	0	0	0	0	0	0
sp|P39019|RS19_HUMAN	sp|P39019|RS19_HUMAN				10428000	10318000	0	0	12050000	0	0	0	4128000	4626700	3825700	0	4124400	5409800	0	0	10289000	0	0	8638100	0	2294200	0	0	2880000	0	0	3330400	0	1325900	0	0	3823700	0	2437600	0	0	4231000	0	7614500	0	0	4141000	0	0
sp|P39023|RL3_HUMAN;sp|Q92901|RL3L_HUMAN	sp|P39023|RL3_HUMAN				9464100	11117000	0	0	10713000	0	4014300	0	6037200	0	5126400	0	0	6544600	0	0	0	0	0	0	0	0	0	7693200	0	0	0	0	0	0	0	0	0	0	0	0	0	12693000	0	18488000	0	0	9442200	0	0
sp|P39748|FEN1_HUMAN	sp|P39748|FEN1_HUMAN				8926700	6540700	0	0	0	0	0	0	0	0	0	0	0	1829000	0	0	0	0	0	0	0	0	0	0	0	0	0	0	0	0	0	0	0	0	0	0	0	0	0	0	0	0	0	0	0
sp|P39880|CUX1_HUMAN	sp|P39880|CUX1_HUMAN				0	0	0	0	0	0	0	0	0	0	0	0	0	0	0	0	0	0	0	0	0	0	0	0	0	0	0	0	0	0	0	0	0	0	0	0	0	0	0	0	0	0	0	0	0
sp|P40222|TXLNA_HUMAN	sp|P40222|TXLNA_HUMAN				201560000	1799400	0	0	0	0	0	0	0	0	0	0	0	0	0	0	0	0	0	0	0	0	0	0	0	0	0	0	0	0	0	0	2734700	0	0	0	0	0	3979400	0	0	0	0	0	4495400
sp|P40227|TCPZ_HUMAN;sp|Q92526|TCPW_HUMAN	sp|P40227|TCPZ_HUMAN				0	4060900	0	0	0	0	0	3238300	0	0	0	0	0	0	6840600	5188600	8090500	0	1111800	4371600	0	0	0	2415000	0	0	0	0	0	0	0	16380000	0	0	0	0	0	2308400	0	0	0	0	0	0	0
sp|P40259|CD79B_HUMAN	sp|P40259|CD79B_HUMAN				0	0	0	0	0	0	0	0	0	0	0	0	0	0	0	0	0	0	0	0	0	0	0	0	0	0	0	0	0	0	0	0	0	0	0	0	0	0	0	0	0	0	0	0	0
sp|Q6NVV1|R13P3_HUMAN;sp|P40429|RL13A_HUMAN	sp|Q6NVV1|R13P3_HUMAN;sp|P40429|RL13A_HUMAN				0	0	0	0	4710200	0	0	0	0	0	0	0	0	0	0	0	3689000	0	0	0	0	0	0	0	0	0	0	0	0	0	0	0	0	0	0	0	0	0	0	0	0	0	0	0	0
sp|P40616|ARL1_HUMAN	sp|P40616|ARL1_HUMAN				0	0	0	2420800	0	3510000	0	0	4115100	3890100	3152000	0	5121100	4438000	6118900	0	2075000	0	3386600	0	0	0	4092100	0	0	5024000	0	0	3967000	0	0	1961300	3605800	0	0	3959000	0	0	0	1836900	0	0	0	0	0
sp|P40763|STAT3_HUMAN	sp|P40763|STAT3_HUMAN				0	0	2532700	0	0	27471000	36077000	38726000	0	0	0	0	0	3839300	0	3741700	2838700	0	0	8007000	4390800	6526700	0	1877800	0	0	0	0	1982300	0	0	0	0	0	0	0	0	0	3174400	0	11383000	0	0	12737000	0
sp|P40855|PEX19_HUMAN	sp|P40855|PEX19_HUMAN				0	0	0	0	11073000	0	0	21846000	0	1485200	0	0	5689300	8556700	0	0	0	0	7740400	0	2638200	28876000	0	4851400	11243000	0	0	10500000	0	28007000	19111000	0	0	0	7195700	0	0	3567600	3292100	12008000	2863600	2923100	14730000	0	0
sp|P40926|MDHM_HUMAN	sp|P40926|MDHM_HUMAN				0	0	0	0	1322200	2439700	0	0	0	0	737730	0	2070000	0	0	0	10904000	0	0	5308500	0	0	0	22731000	20015000	939790	0	0	0	0	0	0	0	0	0	0	0	0	0	6087400	4305800	0	0	0	0
sp|P40938|RFC3_HUMAN	sp|P40938|RFC3_HUMAN				0	0	0	0	0	0	0	0	0	0	0	0	2108200	2000900	0	0	0	0	0	0	0	0	0	0	0	0	0	0	0	0	0	0	0	0	0	0	0	0	0	0	0	0	0	0	0
sp|P40939|ECHA_HUMAN	sp|P40939|ECHA_HUMAN				0	0	0	0	0	0	0	0	0	0	0	0	0	0	0	0	0	0	0	0	0	0	0	0	0	0	0	0	0	0	0	0	0	0	0	0	0	0	0	0	0	0	0	0	0
sp|Q2VIR3|IF2GL_HUMAN;sp|P41091|IF2G_HUMAN	sp|Q2VIR3|IF2GL_HUMAN;sp|P41091|IF2G_HUMAN				0	0	0	0	0	0	0	0	0	0	0	0	0	0	0	0	0	0	0	0	0	0	0	0	0	0	0	0	0	0	0	0	0	0	0	0	0	0	0	0	0	2617200	0	0	0
sp|P41208|CETN2_HUMAN	sp|P41208|CETN2_HUMAN				0	0	0	0	0	0	0	0	0	0	0	0	0	0	0	0	0	0	0	0	3286500	0	0	6124400	0	0	0	0	0	0	0	0	0	0	0	0	0	0	0	0	0	0	0	0	0
sp|P41214|EIF2D_HUMAN	sp|P41214|EIF2D_HUMAN				0	0	0	0	0	0	0	0	0	0	0	0	0	0	0	0	0	0	0	0	0	0	0	0	0	0	0	0	0	0	0	0	0	0	0	0	0	0	0	0	0	0	0	0	0
sp|P41219|PERI_HUMAN	sp|P41219|PERI_HUMAN				0	0	0	0	0	0	0	0	0	0	0	0	0	0	0	0	0	0	0	0	0	0	97462000	0	0	105920000	0	0	0	0	0	0	0	0	0	0	0	0	0	0	0	0	0	0	0
sp|P41229|KDM5C_HUMAN;sp|Q9BY66|KDM5D_HUMAN;sp|Q9UGL1|KDM5B_HUMAN	sp|P41229|KDM5C_HUMAN;sp|Q9BY66|KDM5D_HUMAN				0	0	0	0	0	0	0	0	0	0	0	0	0	0	0	0	0	0	0	0	0	0	0	0	0	0	0	0	0	0	0	0	0	0	0	0	0	0	0	0	0	0	0	0	0
sp|P41236|IPP2_HUMAN;sp|Q6NXS1|IPP2M_HUMAN	sp|P41236|IPP2_HUMAN;sp|Q6NXS1|IPP2M_HUMAN				0	0	0	0	0	0	0	0	0	0	0	0	0	0	0	0	0	0	0	0	0	0	0	0	0	0	0	0	0	0	0	0	0	0	0	0	0	0	0	0	0	0	0	0	0
sp|P41240|CSK_HUMAN	sp|P41240|CSK_HUMAN				0	0	0	0	0	0	0	0	0	0	0	0	0	0	0	0	0	0	0	0	0	0	0	0	0	0	0	0	0	0	0	0	0	0	0	0	0	0	0	0	0	0	0	0	0
sp|P41250|GARS_HUMAN	sp|P41250|GARS_HUMAN				2956300	3058300	0	0	0	0	0	0	0	0	0	0	0	0	0	0	0	0	0	0	0	0	0	566500	1169800	0	0	0	0	0	0	0	0	0	0	0	0	0	0	0	0	0	0	930880	0
sp|P41252|SYIC_HUMAN	sp|P41252|SYIC_HUMAN				0	0	0	0	2699700	0	0	0	0	0	0	0	0	0	0	2544800	7423100	2684500	1814800	0	1905100	0	0	13744000	0	6076400	0	0	0	0	0	1924800	0	0	0	0	0	0	0	0	0	0	0	0	0
sp|P41440|S19A1_HUMAN	sp|P41440|S19A1_HUMAN				32839000	27658000	0	0	0	0	0	4920000	0	0	0	0	0	0	15274000	17687000	14817000	10383000	10013000	18017000	12765000	0	0	27634000	0	0	11286000	0	6549300	13508000	0	7896400	0	0	0	0	0	0	0	0	0	0	0	6965800	0
sp|P41743|KPCI_HUMAN	sp|P41743|KPCI_HUMAN				0	0	0	8513400	0	0	0	0	0	0	0	0	0	0	0	0	0	0	0	0	0	0	0	0	0	0	0	0	0	0	0	0	1690100	0	0	0	0	0	1009400	0	0	0	0	0	0
sp|P42166|LAP2A_HUMAN	sp|P42166|LAP2A_HUMAN				0	0	0	0	0	0	0	0	0	0	0	0	0	0	0	0	2091400	0	0	0	0	0	0	0	0	0	0	0	0	0	0	0	0	0	0	0	0	0	0	0	0	0	0	0	0
sp|P42167|LAP2B_HUMAN	sp|P42167|LAP2B_HUMAN				915680000	1894100000	539040000	304320000	287570000	543170000	497290000	320050000	572430000	235650000	269330000	472050000	354880000	343930000	968040000	412870000	763420000	296920000	598330000	580230000	704750000	438840000	445320000	445850000	217620000	231050000	360410000	160280000	523780000	267850000	132270000	350470000	136160000	93957000	513990000	91611000	44000000	72314000	106550000	101500000	333290000	180590000	109580000	499870000	129200000
sp|P42224|STAT1_HUMAN	sp|P42224|STAT1_HUMAN				0	0	0	0	0	0	0	0	0	1504500	0	0	0	0	3683300	2991000	9139000	0	0	4551500	0	1818900	0	0	0	0	0	0	3438800	0	0	0	0	0	0	0	0	0	0	0	0	0	0	3038700	0
sp|P42285|SK2L2_HUMAN	sp|P42285|SK2L2_HUMAN				0	0	0	0	0	0	0	0	0	0	0	0	0	0	0	0	0	0	0	0	0	0	0	0	0	0	0	0	565560	0	0	0	0	0	0	0	0	0	0	0	0	0	0	0	0
sp|P42345|MTOR_HUMAN	sp|P42345|MTOR_HUMAN				0	0	0	0	0	0	0	0	0	0	0	0	0	0	0	0	0	0	0	0	0	0	0	0	0	0	0	0	0	0	0	0	0	0	0	0	0	0	0	0	0	0	0	0	0
sp|P42356|PI4KA_HUMAN;sp|A4QPH2|PI4P2_HUMAN;sp|Q8N8J0|PI4P1_HUMAN	sp|P42356|PI4KA_HUMAN				0	0	0	0	0	0	4605300	1067100	0	0	0	0	0	0	0	1860400	0	0	0	2084900	3185300	0	0	4559400	0	0	0	0	1709900	0	0	0	0	0	0	0	0	0	0	0	580610	0	0	3472600	0
sp|P42566|EPS15_HUMAN	sp|P42566|EPS15_HUMAN				0	0	3197500	4291700	8434500	13533000	0	18101000	8476800	0	0	3386300	4874500	12244000	44066000	13988000	8749300	6009000	6345500	16055000	18014000	3870300	3914900	3644100	0	10399000	4034200	0	16920000	0	0	1529000	10027000	0	0	0	0	0	0	5128100	0	0	0	4237800	0
sp|P42677|RS27_HUMAN	sp|P42677|RS27_HUMAN				230220000	85266000	258090000	473250000	739180000	295000000	793040000	477150000	980380000	1927500000	1829800000	1877600000	2139200000	3000500000	126990000	171380000	400120000	191820000	235070000	482630000	188550000	377450000	490740000	419150000	154060000	530290000	182730000	95134000	214280000	98317000	92230000	446500000	856940000	437390000	697850000	904410000	663080000	638670000	501930000	1801400000	95758000	802080000	1124900000	91128000	1355100000
sp|P42684|ABL2_HUMAN;sp|P00519|ABL1_HUMAN	sp|P42684|ABL2_HUMAN				0	0	4608200	0	0	0	0	0	0	0	0	0	0	0	0	0	0	0	0	0	3233600	0	0	2319200	0	0	0	0	0	0	0	0	0	0	0	0	0	0	0	0	0	0	0	0	0
sp|P42694|HELZ_HUMAN	sp|P42694|HELZ_HUMAN				0	0	15820000	923280	3770400	18824000	28450000	27115000	0	0	2346300	3775200	0	0	3214300	3382600	8664700	0	4093400	7522800	9189700	722850	876540	11641000	1492600	1004000	0	0	11131000	0	0	0	0	0	0	0	0	0	717910	0	635660	0	0	4922000	0
sp|P42695|CNDD3_HUMAN	sp|P42695|CNDD3_HUMAN				0	0	628810	1406700	2911700	1817400	2763300	0	0	0	0	0	0	0	1591100	915260	0	1844800	625590	623410	2783500	810970	0	5317500	6705100	0	0	0	235940	0	0	696740	0	0	0	0	0	0	2348400	0	0	0	0	36672000	0
sp|P42704|LPPRC_HUMAN	sp|P42704|LPPRC_HUMAN				0	24937000	0	3124200	23015000	0	0	0	8329900	1856700	0	2247000	0	0	9332400	3522600	26146000	2966800	7133300	20004000	79728000	70872000	69949000	387290000	737000000	522680000	32245000	0	7777900	15453000	0	1957700	2403200	0	0	0	0	0	0	2788600	5534700	9380000	0	13538000	9427100
sp|P42766|RL35_HUMAN	sp|P42766|RL35_HUMAN				1984500000	2507400000	3506700000	1940300000	1994500000	1263100000	1936200000	2627800000	1896000000	6036500000	4346300000	2768600000	2802500000	5988800000	648450000	1306600000	1035000000	1191700000	1487400000	1669500000	1762200000	1106900000	1693100000	799400000	1448700000	2936500000	764380000	3453600000	1054400000	2472700000	2202400000	1215800000	1917400000	1167900000	3452100000	4009900000	1645100000	1677500000	3590200000	2919100000	672720000	4131300000	3191300000	842870000	9918600000
sp|P42858|HD_HUMAN	sp|P42858|HD_HUMAN				0	0	0	0	0	0	0	0	0	0	0	0	0	0	0	0	0	0	0	0	197700	0	0	0	0	0	0	0	658710	0	0	116960	0	0	0	0	0	0	0	0	0	0	0	236530	0
sp|P43003|EAA1_HUMAN;sp|P48664|EAA4_HUMAN	sp|P43003|EAA1_HUMAN				0	0	4704100	0	0	4775300	0	3891900	0	0	0	0	0	0	2079800	1481800	2632200	1593000	525920	1205300	0	0	0	408000	0	0	0	0	345910	496550	0	303790	0	0	0	0	0	0	0	0	0	0	0	1451100	0
sp|P43121|MUC18_HUMAN	sp|P43121|MUC18_HUMAN				0	0	0	0	0	0	0	0	0	0	0	2628100	0	0	18593000	5044300	6508600	0	8080100	9286900	1712400	0	2306600	0	0	0	4453400	0	3101500	4467600	0	12967000	0	0	4550800	0	0	0	0	0	1956000	0	0	3135100	0
sp|P43246|MSH2_HUMAN	sp|P43246|MSH2_HUMAN				0	0	0	0	0	0	0	0	0	0	0	0	0	0	0	0	0	0	0	0	0	0	0	0	0	0	0	0	0	0	0	0	0	0	0	0	0	0	0	0	3793000	0	0	0	0
sp|P43307|SSRA_HUMAN	sp|P43307|SSRA_HUMAN				100470000	96726000	11251000	7082900	16068000	24963000	12916000	30527000	20318000	3818800	7881200	28661000	7283500	0	46817000	18476000	29642000	10396000	18934000	18033000	25355000	13778000	52230000	21684000	10944000	22311000	15921000	7078700	16553000	0	0	0	5841800	0	27705000	0	0	0	0	0	11755000	0	0	18519000	0
sp|P43487|RANG_HUMAN	sp|P43487|RANG_HUMAN				23535000	0	15731000	6190800	17936000	19243000	7356700	26536000	25841000	11287000	11962000	10100000	10498000	0	6966800	0	3232300	0	7746500	0	1194600	13844000	27479000	5316700	10217000	8145100	0	12327000	7987000	0	11769000	0	0	0	14619000	0	0	0	0	5340100	7351400	0	20733000	10875000	0
sp|P43490|NAMPT_HUMAN	sp|P43490|NAMPT_HUMAN				0	0	0	0	0	0	0	0	0	0	0	0	0	0	0	0	0	0	0	0	0	0	0	0	0	0	0	0	0	0	0	0	0	0	0	0	0	0	0	0	0	2915400	0	0	0
sp|P43686|PRS6B_HUMAN	sp|P43686|PRS6B_HUMAN				0	0	0	0	0	0	0	0	0	0	0	0	0	0	0	0	0	0	0	0	0	0	0	0	0	0	0	0	0	0	0	0	0	0	0	0	0	0	0	0	0	0	0	0	0
sp|P45880|VDAC2_HUMAN	sp|P45880|VDAC2_HUMAN				105610000	61777000	0	9662100	0	4667700	0	0	3108300	3781400	0	0	9521000	0	0	0	0	0	2792400	0	0	0	0	2128300	0	14162000	0	0	0	0	0	0	13907000	0	0	9905900	0	0	0	5431100	0	13739000	0	0	60976000
sp|P45974|UBP5_HUMAN	sp|P45974|UBP5_HUMAN				0	0	0	0	0	0	0	3130600	0	0	0	0	0	0	0	2440500	0	0	0	0	19510000	0	3347900	32139000	13589000	7547700	0	0	1127300	0	0	0	0	0	0	0	0	0	0	0	0	0	0	0	0
sp|P45984|MK09_HUMAN;sp|P53779|MK10_HUMAN	sp|P45984|MK09_HUMAN;sp|P53779|MK10_HUMAN				0	0	0	0	0	0	0	0	0	0	0	0	0	0	0	0	0	0	0	0	0	0	0	0	0	0	0	0	0	0	0	0	0	0	0	0	0	0	0	0	0	0	0	0	0
sp|P46013|KI67_HUMAN	sp|P46013|KI67_HUMAN				0	0	0	0	0	0	0	0	0	0	0	0	0	0	0	0	0	0	0	0	0	0	0	0	0	0	0	0	0	0	0	0	0	0	0	0	0	0	0	0	0	0	0	0	0
sp|P46020|KPB1_HUMAN	sp|P46020|KPB1_HUMAN				0	0	0	0	0	0	0	0	0	0	0	0	0	0	0	0	0	0	0	0	0	0	0	0	0	0	0	0	0	0	0	0	0	0	0	0	0	0	0	0	0	5894300	0	0	0
sp|P46060|RAGP1_HUMAN	sp|P46060|RAGP1_HUMAN				92488000	111050000	11509000	0	0	0	37685000	18694000	0	0	0	0	0	0	1589000	0	0	0	0	5712000	39576000	9503300	26214000	24467000	25068000	0	21445000	5012500	0	40225000	0	0	0	0	0	0	0	0	104880000	0	147250000	19407000	0	907670	0
sp|P46100|ATRX_HUMAN	sp|P46100|ATRX_HUMAN				0	0	0	0	0	0	0	0	0	0	0	0	0	0	0	0	0	0	0	0	0	0	0	0	0	0	0	0	0	0	0	0	0	0	2532100	0	0	0	0	0	0	0	0	0	0
sp|P46108|CRK_HUMAN	sp|P46108|CRK_HUMAN				70186000	66261000	380950000	193770000	208350000	655990000	370010000	531550000	339620000	45282000	79725000	496350000	156920000	151140000	284830000	100660000	187310000	110360000	176190000	222960000	278760000	298340000	414920000	211370000	319800000	206460000	119050000	204190000	216940000	252060000	163350000	160240000	43196000	31589000	84158000	10500000	36907000	51871000	31067000	48962000	227180000	69066000	92421000	192470000	24663000
sp|P46109|CRKL_HUMAN	sp|P46109|CRKL_HUMAN				66023000	111140000	260570000	128910000	249220000	710910000	410050000	482470000	187620000	3228800	65150000	379850000	51178000	177930000	325110000	136200000	215990000	99410000	176640000	221270000	242610000	128230000	195890000	143340000	163930000	63711000	127960000	282950000	178500000	208410000	202450000	134290000	58047000	25015000	110470000	13629000	6452200	27494000	6891500	127880000	318180000	47830000	84415000	215960000	0
sp|P46199|IF2M_HUMAN	sp|P46199|IF2M_HUMAN				0	0	0	0	0	0	0	0	0	0	0	0	0	0	0	0	0	0	0	0	0	0	0	6917900	54579000	20539000	0	0	0	0	0	0	0	0	0	0	0	0	0	0	0	0	0	0	0
sp|P46379|BAG6_HUMAN	sp|P46379|BAG6_HUMAN				0	0	0	0	0	0	0	0	0	0	0	0	0	0	0	0	0	0	0	0	0	0	0	8405700	0	5194100	0	0	0	0	0	0	0	0	0	0	0	0	0	0	0	0	0	0	0
sp|P46734|MP2K3_HUMAN;sp|P52564|MP2K6_HUMAN	sp|P46734|MP2K3_HUMAN				0	0	0	0	0	0	0	0	0	0	0	0	0	5915000	0	0	0	0	0	0	0	0	0	0	0	0	0	0	0	0	0	0	0	0	0	0	0	0	0	0	0	0	0	0	0
sp|P46776|RL27A_HUMAN	sp|P46776|RL27A_HUMAN				747600000	886070000	902720000	1231300000	2317000000	721820000	382830000	1471400000	1307200000	3712400000	3863700000	1308500000	2846100000	3398500000	489160000	466350000	529350000	589680000	1116900000	364950000	647700000	945670000	977130000	820690000	1437500000	1896400000	373190000	1428100000	644740000	599950000	1179900000	914350000	1345100000	1142200000	2875100000	2461300000	1884100000	4229600000	665990000	5042800000	468160000	1493700000	4253800000	304830000	1601000000
sp|P46777|RL5_HUMAN	sp|P46777|RL5_HUMAN				0	0	0	0	0	0	0	0	0	0	0	0	0	0	0	0	0	0	0	0	0	0	0	0	0	0	0	0	0	0	0	0	0	0	0	0	0	0	0	5241400	0	0	0	0	0
sp|P46778|RL21_HUMAN	sp|P46778|RL21_HUMAN				0	11203000	0	14343000	29292000	0	4291300	23951000	11417000	5431500	8044600	0	8546500	4690100	0	11406000	0	15905000	6113400	0	0	0	5133500	4472100	13383000	11609000	10168000	18800000	0	6446400	18985000	3807700	14478000	9228900	15998000	21318000	0	41730000	0	8358500	0	0	11429000	0	24501000
sp|P46779|RL28_HUMAN	sp|P46779|RL28_HUMAN				224590000	249670000	146550000	160710000	484120000	79973000	68057000	297620000	168870000	438260000	400050000	157320000	365690000	250880000	51181000	62171000	79028000	74708000	134980000	50576000	31984000	93066000	156820000	88988000	119020000	345910000	49310000	194720000	31345000	116080000	143870000	81122000	137840000	90694000	642530000	232230000	43827000	884270000	146450000	318980000	72888000	201870000	528280000	44596000	285580000
sp|P46781|RS9_HUMAN	sp|P46781|RS9_HUMAN				66668000	26957000	30820000	42187000	106350000	28209000	22338000	41514000	46139000	86130000	65640000	36234000	48581000	73586000	7622000	0	28708000	8218400	28866000	4061100	5461800	0	48834000	4348900	10912000	83882000	4721400	39141000	15309000	0	22454000	17408000	57815000	107330000	52259000	76380000	17892000	106690000	5816900	88326000	20646000	5467500	76370000	0	129190000
sp|P46782|RS5_HUMAN	sp|P46782|RS5_HUMAN				77767000	2477000	0	0	5272000	0	0	0	7955900	7083700	3654100	0	9643000	11302000	8819300	0	9732200	0	1011700	0	0	0	3847500	1418100	0	4414000	7160600	773820	0	0	0	0	31425000	11033000	1749100	14583000	7019100	0	14567000	5309100	8343300	39631000	3093600	0	4453500
sp|P46783|RS10_HUMAN;sp|Q9NQ39|RS10L_HUMAN	sp|P46783|RS10_HUMAN				0	0	0	0	942750	0	0	0	1951500	0	0	0	0	0	0	0	478930	0	0	0	0	0	0	385390	0	0	0	0	0	0	0	0	0	0	865980	0	0	0	0	0	0	0	0	0	0
sp|P46821|MAP1B_HUMAN	sp|P46821|MAP1B_HUMAN				0	0	13310000	47463000	8887600	93529000	138540000	42113000	4800600	0	0	0	3936500	5013100	68985000	181460000	142430000	17584000	9499600	84362000	129330000	24423000	103760000	222850000	18031000	20921000	29023000	0	64477000	17329000	0	66641000	0	0	45046000	0	0	0	0	0	7063400	0	0	45556000	0
sp|P46939|UTRO_HUMAN;sp|Q13474|DRP2_HUMAN;REV__sp|Q5VTR2|BRE1A_HUMAN	sp|P46939|UTRO_HUMAN				82053000	0	183770000	294900000	28989000	310300000	196410000	333600000	4609700	14346000	69481000	20051000	58481000	37311000	336330000	116690000	331730000	329680000	237790000	351400000	2091400000	1460800000	1532900000	330270000	193130000	107730000	425450000	0	997660000	165690000	0	768000000	38093000	0	64664000	0	0	0	0	0	133870000	12474000	34254000	545510000	0
sp|P46940|IQGA1_HUMAN	sp|P46940|IQGA1_HUMAN				0	0	1223800000	1427800000	369280000	1188600	3534300	813660	79194000	17053000	7280100	0	0	0	0	0	1055400	0	0	0	0	0	0	4107300	1277200	0	0	0	0	0	0	0	0	0	0	0	0	0	0	0	0	0	0	0	0
sp|P46977|STT3A_HUMAN	sp|P46977|STT3A_HUMAN				0	48629000	0	0	0	0	0	0	0	0	0	0	0	0	0	0	0	0	0	0	0	0	0	0	0	0	0	0	0	0	0	0	0	0	0	0	0	0	0	0	0	0	0	0	0
sp|P47712|PA24A_HUMAN	sp|P47712|PA24A_HUMAN				0	0	1164600	0	1199400	2694300	0	32522000	0	0	0	0	0	0	15172000	6347900	18194000	2557500	3185200	6307300	5444000	9393600	7032000	745960	0	0	2012600	0	34270000	2534100	0	19477000	0	0	0	0	0	0	0	0	21852000	0	0	13975000	0
sp|P47736|RPGP1_HUMAN;sp|Q684P5|RPGP2_HUMAN	sp|P47736|RPGP1_HUMAN				0	0	0	0	0	0	0	0	0	0	0	0	0	0	0	0	0	0	0	0	0	0	0	0	0	0	0	0	0	0	0	0	0	0	0	0	0	0	0	0	0	0	0	0	0
sp|P47756|CAPZB_HUMAN	sp|P47756|CAPZB_HUMAN				9787100	0	0	0	0	0	0	0	0	4728200	1395800	0	0	0	0	0	0	0	0	0	0	0	0	0	0	0	0	0	0	0	0	0	0	0	0	0	0	0	0	0	0	0	0	0	0
sp|P47914|RL29_HUMAN	sp|P47914|RL29_HUMAN				2201000000	2902000000	1056500000	373680000	2294300000	419610000	300150000	1788700000	135100000	591700000	627500000	246130000	958590000	924430000	224090000	692790000	172250000	772570000	376210000	235090000	170680000	461540000	454680000	850350000	653370000	939320000	330850000	1853500000	334900000	654570000	1846900000	272900000	564160000	414110000	908900000	1481900000	348520000	1573200000	700180000	942460000	134620000	422990000	1592000000	121680000	780460000
sp|P47929|LEG7_HUMAN	sp|P47929|LEG7_HUMAN				0	0	0	0	0	0	0	0	0	0	0	0	0	0	0	0	0	0	0	0	0	0	0	0	0	0	0	0	0	0	0	0	0	0	0	0	0	0	0	0	0	0	0	0	0
sp|P48029|SC6A8_HUMAN;sp|Q9NSD5|S6A13_HUMAN;sp|P48065|S6A12_HUMAN;sp|P23975|SC6A2_HUMAN	sp|P48029|SC6A8_HUMAN				1960300	6623000	5681000	9682000	0	0	5348800	6510500	0	0	0	0	0	0	6218200	0	6559400	12413000	3633200	8721700	3020700	0	6019100	4895500	0	0	0	0	9701100	0	0	2501400	0	0	0	0	0	0	0	0	0	0	0	0	0
sp|P48047|ATPO_HUMAN	sp|P48047|ATPO_HUMAN				16704000	5005400	0	0	0	0	0	0	0	0	0	0	0	0	0	0	0	0	0	0	0	0	0	0	0	0	0	0	0	0	0	0	0	0	0	0	0	0	0	0	0	0	0	0	8946700
sp|P48066|S6A11_HUMAN	sp|P48066|S6A11_HUMAN				0	0	0	0	0	0	0	0	0	0	0	0	0	0	0	0	0	0	0	0	4693100	0	0	0	0	0	0	0	0	0	0	0	0	0	0	0	0	0	0	0	0	0	1969100	0	0
sp|P48067|SC6A9_HUMAN	sp|P48067|SC6A9_HUMAN				0	8161700	4397900	0	0	0	0	0	0	0	0	0	0	0	0	10134000	0	0	0	4153100	0	0	0	0	0	0	0	0	0	0	0	0	0	0	0	0	0	0	0	0	0	0	0	0	0
sp|P48426|PI42A_HUMAN	sp|P48426|PI42A_HUMAN				0	0	0	0	0	0	0	0	0	0	0	0	0	0	0	0	0	0	0	0	0	0	0	0	0	0	0	0	0	0	0	0	0	0	0	0	0	0	0	0	0	0	0	0	0
sp|P48444|COPD_HUMAN	sp|P48444|COPD_HUMAN				16946000	0	0	0	8042700	9451800	0	22532000	5712900	25425000	41124000	0	13707000	109420000	8764800	0	0	0	0	0	2796700	0	6006100	8013100	0	4394000	0	0	7639800	0	0	0	0	0	7156000	0	0	3673400	0	20751000	6960900	2799200	5082900	0	0
sp|P48553|TPC10_HUMAN	sp|P48553|TPC10_HUMAN				0	0	0	0	0	0	0	0	0	0	0	0	0	0	0	0	0	0	0	0	0	0	0	0	0	0	0	0	14639000	98373000	89683000	174150000	0	0	0	0	0	0	0	0	0	0	0	0	0
sp|P48556|PSMD8_HUMAN	sp|P48556|PSMD8_HUMAN				0	0	0	0	0	0	0	0	0	0	0	0	0	0	0	0	0	0	0	0	0	0	0	0	0	0	0	0	0	0	0	0	0	0	0	0	0	0	0	0	0	0	0	0	0
sp|P48634|PRC2A_HUMAN	sp|P48634|PRC2A_HUMAN				0	0	0	0	0	0	0	1668600	1578400	0	0	0	0	0	3613400	0	5458400	0	3923700	4783600	5282700	0	0	1197200	0	0	0	0	0	0	0	0	0	0	2586200	0	0	0	0	0	0	0	0	0	0
sp|P48643|TCPE_HUMAN	sp|P48643|TCPE_HUMAN				8247700	0	0	0	8544600	0	0	0	7049500	2129600	0	0	2296400	0	0	0	0	0	0	0	6454700	0	0	11969000	0	0	0	0	0	0	0	0	4740800	0	0	3527300	0	0	0	0	0	0	0	0	0
sp|P48651|PTSS1_HUMAN	sp|P48651|PTSS1_HUMAN				0	0	0	6404600	0	0	6126300	0	0	0	0	0	0	0	5024300	15660000	11143000	6374300	0	3998900	5828000	0	0	2209200	0	0	0	0	3690000	0	0	2593700	0	0	0	0	0	0	7667500	0	0	0	0	0	0
sp|P48729|KC1A_HUMAN;sp|Q8N752|KC1AL_HUMAN	sp|P48729|KC1A_HUMAN				0	0	0	0	0	0	0	0	0	0	0	0	0	0	0	0	0	0	0	0	0	0	0	0	0	0	0	0	0	0	0	0	0	0	0	0	0	0	0	0	102090	0	0	162890	0
sp|P48735|IDHP_HUMAN	sp|P48735|IDHP_HUMAN				0	0	0	0	0	0	0	0	0	0	0	0	1500800	19324000	0	0	0	0	0	0	0	0	0	0	0	0	0	0	0	0	0	0	0	0	0	0	0	0	0	0	0	0	970430	0	0
sp|P49006|MRP_HUMAN	sp|P49006|MRP_HUMAN				10567000	10579000	0	0	4820300	0	0	7095600	0	0	1956700	0	3615400	4707600	2581900	0	0	1844800	0	0	0	0	567860	0	0	0	0	0	0	0	0	0	0	0	0	0	0	2468900	0	4965400	0	0	3832900	0	0
sp|P49023|PAXI_HUMAN	sp|P49023|PAXI_HUMAN				0	0	0	0	0	0	0	0	0	0	0	0	0	0	0	0	0	0	0	0	0	0	0	0	0	0	0	0	0	0	0	0	0	0	0	0	0	0	0	0	0	0	0	0	0
sp|P49069|CAMLG_HUMAN	sp|P49069|CAMLG_HUMAN				7100800	6526000	0	0	0	9107500	3304600	10099000	0	0	3028300	0	3916600	0	11667000	14976000	15917000	7925000	1024600	2731000	6079200	0	0	7542500	0	0	0	0	7363000	0	0	14154000	0	0	3663900	0	0	5798500	0	0	0	0	0	9349800	0
sp|P49207|RL34_HUMAN	sp|P49207|RL34_HUMAN				146400000	272460000	148350000	461250000	1098000000	210990000	123890000	559480000	195920000	606400000	686350000	217170000	438470000	660490000	62521000	51058000	124620000	64101000	156080000	256450000	61923000	96406000	84646000	63397000	374550000	320170000	35105000	507990000	90086000	159620000	450830000	241750000	233120000	178790000	447870000	516600000	318840000	536080000	187270000	873470000	84819000	287680000	903130000	77851000	301710000
sp|P49257|LMAN1_HUMAN	sp|P49257|LMAN1_HUMAN				532640000	372840000	0	0	0	0	0	1733200	0	0	4388600	0	5281800	0	0	13321000	0	0	0	0	0	0	0	66043000	16199000	14452000	0	0	0	0	2279100	0	7422200	0	8013600	7029900	0	0	6739000	0	0	7331600	3725900	0	0
sp|P49321|NASP_HUMAN	sp|P49321|NASP_HUMAN				32488000	19803000	0	0	12954000	0	0	0	0	0	0	0	0	0	0	0	0	6611200	0	0	0	0	3645100	77031000	12268000	20188000	0	0	0	0	0	0	4610100	0	5490800	0	0	0	0	0	0	0	0	0	0
sp|P49327|FAS_HUMAN	sp|P49327|FAS_HUMAN				5811800000	1295900000	1753100000	1611800000	2297600000	1550800000	2832800000	3632200000	1696500000	726990000	948190000	1921000000	1063300000	1033700000	4199100000	5290100000	2617400000	4734000000	4480100000	3928000000	3623000000	3006800000	2022000000	4380200000	2515300000	2640200000	3380100000	2136800000	3975900000	5491500000	3590300000	4573000000	1607900000	1238300000	2033800000	811450000	379400000	238860000	2739100000	780090000	2292700000	3574600000	1915600000	2559100000	697850000
sp|P49366|DHYS_HUMAN	sp|P49366|DHYS_HUMAN				0	0	0	0	0	0	0	0	0	0	0	0	0	0	0	0	0	0	0	0	0	0	0	0	0	0	0	0	0	0	0	0	0	0	0	0	0	0	0	0	0	0	744670	0	0
sp|P49368|TCPG_HUMAN	sp|P49368|TCPG_HUMAN				8199100	5121000	0	0	6198700	0	0	0	3301000	0	0	0	0	0	0	0	0	0	0	0	0	0	0	7809700	0	0	0	0	0	0	0	0	0	0	0	6298100	0	0	0	0	0	0	0	0	0
sp|P49411|EFTU_HUMAN	sp|P49411|EFTU_HUMAN				102950000	87048000	65658000	69475000	52607000	69012000	99031000	50947000	94216000	0	58280000	74404000	188060000	194000000	54399000	61168000	71724000	68039000	38396000	58266000	61165000	48132000	60545000	79262000	51175000	61582000	99069000	0	74530000	0	0	87718000	93922000	132760000	40626000	80303000	107640000	63140000	0	98484000	70945000	47747000	65333000	70117000	178760000
sp|P49454|CENPF_HUMAN;sp|P19320|VCAM1_HUMAN	sp|P49454|CENPF_HUMAN				0	0	0	0	0	1785300	1560600	9836800	0	0	0	0	0	0	0	0	3602900	0	0	0	26755000	0	4076900	0	0	0	0	0	76721000	0	602400	1752800	0	0	6885700	0	0	0	0	0	3258800	0	0	4539800	0
sp|P49458|SRP09_HUMAN	sp|P49458|SRP09_HUMAN				2235700	0	0	0	0	0	0	0	2969800	5800400	4873700	4485800	6128100	6638600	0	0	3941000	0	0	0	0	0	0	0	0	2280600	0	0	0	0	0	563050	0	0	2380700	4748800	0	2654700	0	6665500	0	0	5359000	0	3707500
sp|P49588|SYAC_HUMAN	sp|P49588|SYAC_HUMAN				0	0	0	0	0	0	0	0	0	0	0	0	0	0	0	0	0	0	2443400	0	10920000	1422900	0	2795200	9586200	0	0	0	2397600	2913100	0	0	0	0	0	0	0	0	0	0	1388200	0	0	0	0
sp|P49591|SYSC_HUMAN	sp|P49591|SYSC_HUMAN				786720	0	0	0	0	0	0	0	0	0	0	0	0	0	0	0	0	0	0	0	0	0	0	0	0	0	0	0	0	0	0	0	0	0	0	0	0	0	0	0	0	0	0	0	0
sp|P49674|KC1E_HUMAN	sp|P49674|KC1E_HUMAN				0	0	0	0	0	0	0	0	0	0	0	0	1241600	1405600	0	0	0	0	0	0	0	0	0	1584200	0	0	0	0	0	0	0	0	0	0	0	0	0	0	0	0	0	0	0	0	0
sp|P49720|PSB3_HUMAN	sp|P49720|PSB3_HUMAN				0	0	0	0	0	0	0	0	0	0	0	0	0	0	0	0	0	0	0	0	0	0	0	0	0	0	0	0	0	0	0	0	0	0	0	0	0	0	0	0	0	0	0	0	0
sp|P49753|ACOT2_HUMAN	sp|P49753|ACOT2_HUMAN				0	0	0	0	0	0	0	0	0	0	0	0	0	0	0	0	0	0	0	0	0	0	0	0	41476000	0	0	0	0	0	0	0	0	0	0	0	0	0	0	0	0	0	0	0	0
sp|P49756|RBM25_HUMAN	sp|P49756|RBM25_HUMAN				0	0	0	3265700	0	0	0	0	0	0	0	0	9409800	7481100	0	18792000	0	24917000	0	0	11597000	0	0	14424000	0	13165000	0	0	5421800	0	0	0	0	12521000	0	0	981730	14881000	0	0	0	1509200	0	1980900	0
sp|P49757|NUMB_HUMAN	sp|P49757|NUMB_HUMAN				15886000	12140000	24729000	22728000	0	1091700	28762000	19189000	10544000	19700000	28257000	0	41310000	17505000	23553000	14082000	7384400	18913000	15154000	54131000	11641000	1255500	0	7944900	2365900	0	28104000	0	0	20067000	0	6497200	32128000	13230000	0	38386000	18396000	0	23188000	11044000	12166000	30377000	0	30278000	18267000
sp|P49768|PSN1_HUMAN;sp|P49810|PSN2_HUMAN	sp|P49768|PSN1_HUMAN				0	0	0	0	0	0	0	0	0	0	0	0	0	0	0	0	2097100	0	0	1007600	0	0	0	0	0	0	0	3364300	0	0	3436700	0	0	0	0	0	0	0	0	0	0	0	0	0	0
sp|P49773|HINT1_HUMAN	sp|P49773|HINT1_HUMAN				0	0	0	0	0	0	0	0	0	0	0	0	0	0	0	0	0	0	0	0	0	0	0	0	0	0	0	0	0	0	0	0	0	0	0	0	0	0	0	0	0	0	0	0	0
sp|P49790|NU153_HUMAN	sp|P49790|NU153_HUMAN				0	0	35263000	0	43516000	32900000	72425000	126910000	0	0	2138000	0	0	0	48348000	39864000	7052700	27747000	13682000	59038000	114680000	0	27324000	101330000	0	11135000	0	0	56182000	0	0	27308000	0	0	19889000	0	0	0	0	0	14358000	0	0	64673000	0
sp|P49792|RBP2_HUMAN	sp|P49792|RBP2_HUMAN				0	0	34573000	127680000	42306000	96379000	98609000	70212000	0	0	1122500	17855000	2191800	10041000	34842000	32863000	60060000	24102000	27642000	92981000	110930000	21953000	113070000	120400000	75099000	62993000	7047400	0	171210000	36997000	0	91945000	0	0	5658600	0	0	0	7216400	8431200	151400000	0	1334600	159650000	0
sp|P49815|TSC2_HUMAN	sp|P49815|TSC2_HUMAN				0	0	0	0	0	2193200	0	0	0	0	0	0	0	0	3077700	3712400	0	4306700	2404300	0	0	0	2282500	0	0	5068700	0	0	0	0	0	0	0	0	0	0	0	0	3707600	0	2774200	5674600	0	2462400	0
sp|P49915|GUAA_HUMAN	sp|P49915|GUAA_HUMAN				0	0	0	0	0	0	0	0	0	0	0	0	0	0	0	0	0	0	0	0	0	0	0	0	0	0	0	0	0	0	0	0	0	0	0	0	0	0	0	0	0	0	0	0	0
sp|P49959|MRE11_HUMAN	sp|P49959|MRE11_HUMAN				120850000	125610000	331780000	254170000	158190000	267610000	282900000	240670000	161970000	207680000	163570000	4055200	189070000	237960000	385600000	261010000	360420000	240850000	219810000	392680000	192000000	138430000	187640000	72173000	97945000	71225000	353250000	364830000	138750000	354770000	361080000	152940000	132950000	46005000	233250000	81158000	61064000	112970000	178470000	223590000	230400000	156930000	308430000	467790000	54530000
sp|P50395|GDIB_HUMAN;sp|P31150|GDIA_HUMAN	sp|P50395|GDIB_HUMAN				0	0	0	0	0	0	0	0	0	0	0	0	0	0	0	0	0	0	0	0	0	0	0	0	0	0	0	0	0	0	0	0	0	0	0	0	0	0	0	0	0	0	0	0	0
sp|P50402|EMD_HUMAN	sp|P50402|EMD_HUMAN				42907000	33094000	11120000	15208000	23341000	33333000	27744000	47959000	31661000	18310000	15250000	32704000	24741000	0	48736000	19592000	41960000	15936000	20183000	24604000	33869000	25901000	63187000	27459000	11938000	23329000	17009000	9871600	41635000	20521000	6719500	24976000	15121000	0	69196000	5830700	0	9960900	0	9498400	12410000	13304000	30388000	20364000	0
sp|P50416|CPT1A_HUMAN;sp|Q92523|CPT1B_HUMAN	sp|P50416|CPT1A_HUMAN				16803000	9156400	77035000	137890000	66822000	52943000	133480000	53987000	0	30514000	37692000	0	5022400	28880000	79965000	70830000	96232000	84820000	9078900	87232000	65987000	107450000	7349300	53059000	35337000	44740000	101260000	150490000	122110000	142710000	173580000	64411000	108730000	30728000	61745000	82206000	22396000	4435200	101160000	1276800	95378000	79200000	45839000	168250000	88136000
sp|P50454|SERPH_HUMAN	sp|P50454|SERPH_HUMAN				0	0	0	0	0	0	0	0	0	0	0	0	0	1995200	0	0	0	0	0	0	0	0	0	2255200	0	0	0	0	0	0	0	0	0	0	0	0	0	0	0	0	0	0	0	0	0
sp|P50479|PDLI4_HUMAN	sp|P50479|PDLI4_HUMAN				0	0	0	0	7583200	38351000	16335000	12155000	0	0	0	31501000	0	9253300	0	0	0	0	3950700	0	0	0	6950600	0	0	0	0	5264100	0	0	0	0	0	0	0	0	0	5390800	0	9292300	0	0	0	0	0
sp|P50502|F10A1_HUMAN;sp|Q8NFI4|F10A5_HUMAN;sp|Q8IZP2|ST134_HUMAN	sp|P50502|F10A1_HUMAN;sp|Q8NFI4|F10A5_HUMAN;sp|Q8IZP2|ST134_HUMAN				2010400	6526300	0	0	0	0	0	3963900	0	0	754000	0	0	0	7237600	0	4149700	0	6222600	2619500	15014000	20182000	19030000	16869000	49274000	17821000	0	0	0	0	0	0	0	0	3163100	4126700	0	12220000	0	4320900	0	2982800	2708400	0	0
sp|P50542|PEX5_HUMAN	sp|P50542|PEX5_HUMAN				0	0	0	0	0	0	0	0	0	0	0	0	0	0	0	0	0	0	0	0	0	0	0	0	0	0	0	0	0	0	0	0	0	0	0	0	0	0	0	0	0	0	0	0	0
sp|P50570|DYN2_HUMAN;sp|Q9UQ16|DYN3_HUMAN	sp|P50570|DYN2_HUMAN;sp|Q9UQ16|DYN3_HUMAN				0	0	0	0	0	0	0	767710	0	0	0	0	0	0	0	0	0	0	0	0	0	0	0	0	0	0	0	0	0	0	0	0	0	0	0	0	0	0	0	0	0	0	0	0	0
sp|P50583|AP4A_HUMAN	sp|P50583|AP4A_HUMAN				0	0	0	0	0	0	0	0	0	0	0	0	0	0	0	0	0	0	0	0	0	0	0	0	0	0	0	0	0	0	0	0	0	0	0	0	0	0	0	0	0	0	0	0	0
sp|P50747|BPL1_HUMAN	sp|P50747|BPL1_HUMAN				8576800	4640600	9168100	12266000	5835400	3610800	5288600	14278000	0	0	0	0	0	2447000	37269000	20226000	32238000	7756200	0	17096000	3959300	21312000	0	0	1463800	0	18461000	50617000	10044000	23743000	35262000	3714900	4818200	0	5952300	7403300	0	14842000	26602000	10326000	12757000	21742000	26420000	34322000	0
sp|P50748|KNTC1_HUMAN	sp|P50748|KNTC1_HUMAN				0	0	0	0	0	0	0	0	0	0	0	0	0	0	0	0	0	0	0	0	0	0	0	0	0	0	0	0	0	0	0	0	0	0	0	0	0	0	0	799430	0	0	0	0	0
sp|P50749|RASF2_HUMAN	sp|P50749|RASF2_HUMAN	+			0	0	0	0	0	0	0	0	0	0	0	0	0	0	0	0	0	0	0	0	0	0	0	0	12156000	0	0	0	0	0	0	0	0	0	0	0	0	0	0	0	0	0	0	0	0
sp|P50851|LRBA_HUMAN	sp|P50851|LRBA_HUMAN				133940000	0	338710000	311420000	360050000	422890000	299840000	588560000	155750000	3995300	18250000	4863100	82072000	132400000	483160000	572130000	681930000	572780000	376950000	758820000	575670000	229120000	221280000	467080000	235460000	129620000	155870000	11167000	740850000	61515000	30086000	593840000	7423500	5309800	21200000	14327000	0	0	494040000	309400000	647800000	157370000	7089300	391850000	19846000
sp|P50914|RL14_HUMAN	sp|P50914|RL14_HUMAN				0	0	0	0	1169400	0	0	0	0	1013300	1440900	0	0	0	0	0	1508900	0	0	0	0	0	0	0	1408700	0	0	0	0	0	0	0	0	0	0	0	0	0	0	0	0	0	5587400	0	0
sp|P50990|TCPQ_HUMAN	sp|P50990|TCPQ_HUMAN				2094100000	1561800000	2288700000	2083600000	3007400000	2463200000	1795700000	3395200000	3775500000	2731400000	3568300000	1217900000	1571800000	1813300000	2893100000	1545100000	2112900000	2023500000	3526900000	2991200000	1843800000	1325300000	1603800000	3791800000	3307200000	3512500000	792570000	749060000	847720000	807470000	779790000	514860000	1536100000	1061000000	2974600000	5161200000	4190800000	7114300000	942720000	758490000	1469700000	670680000	916930000	1338400000	1313200000
sp|P50991|TCPD_HUMAN	sp|P50991|TCPD_HUMAN				0	3090100	0	0	0	0	0	2914100	0	0	0	0	2572600	0	3113900	0	11451000	0	0	7038300	0	0	0	571650	0	1721200	0	0	0	0	0	0	1358900	0	0	0	0	0	0	0	3262900	0	0	0	0
sp|P51003|PAPOA_HUMAN;sp|Q9NRJ5|PAPOB_HUMAN	sp|P51003|PAPOA_HUMAN				2566200	0	0	3043900	0	0	7443100	9557600	0	0	0	0	0	0	2367500	0	2885000	0	0	0	5157200	0	1246900	0	0	0	0	0	4435000	0	0	3788800	0	0	0	0	0	0	0	0	5731400	0	0	3222300	0
sp|P51116|FXR2_HUMAN;sp|P51114|FXR1_HUMAN;sp|Q06787|FMR1_HUMAN	sp|P51116|FXR2_HUMAN				0	0	0	0	0	0	0	0	0	0	0	0	0	0	0	0	0	0	0	0	0	0	0	0	0	0	0	0	0	0	0	0	0	0	0	0	0	0	0	0	0	0	0	0	0
sp|P51148|RAB5C_HUMAN;sp|P61020|RAB5B_HUMAN	sp|P51148|RAB5C_HUMAN;sp|P61020|RAB5B_HUMAN				2117700	0	0	582420	0	601080	0	0	1075100	0	0	0	0	0	0	0	0	0	0	707300	0	376510	0	0	0	0	0	0	0	0	0	0	0	0	0	0	0	0	0	0	0	0	0	0	0
sp|P51149|RAB7A_HUMAN	sp|P51149|RAB7A_HUMAN				15804000	1721900	56856000	42545000	48628000	92164000	97915000	45460000	43753000	8346400	25151000	97409000	28487000	29620000	74914000	166220000	74331000	46750000	66386000	45686000	55070000	95780000	96798000	28690000	37048000	45413000	3624000	80024000	63702000	77165000	66887000	42936000	37749000	8097900	57306000	3846500	7214100	8871900	17663000	26054000	95031000	48150000	23243000	67826000	35540000
sp|P51151|RAB9A_HUMAN;sp|Q9NP90|RAB9B_HUMAN	sp|P51151|RAB9A_HUMAN				0	0	0	0	0	0	0	0	0	0	0	0	0	0	0	0	0	0	0	0	12177000	0	0	16015000	0	0	0	0	0	0	0	0	0	0	23366000	0	0	35514000	0	0	0	0	0	0	0
sp|P51153|RAB13_HUMAN;sp|P59190|RAB15_HUMAN	sp|P51153|RAB13_HUMAN				0	0	0	16869000	30101000	7436100	0	0	10113000	0	0	13732000	0	0	0	0	0	0	0	21031000	0	0	12727000	0	0	0	0	0	0	0	0	4703600	0	0	0	0	0	0	0	0	0	0	0	0	0
sp|P51159|RB27A_HUMAN;sp|O00194|RB27B_HUMAN	sp|P51159|RB27A_HUMAN				0	0	0	0	0	0	0	3015800	0	0	934870	0	0	0	0	0	0	0	0	0	0	0	0	0	0	0	0	0	0	0	0	0	0	0	4491500	0	0	0	0	0	0	0	0	0	0
sp|P51530|DNA2_HUMAN	sp|P51530|DNA2_HUMAN				0	0	0	0	0	0	0	0	0	0	0	0	0	0	0	0	0	0	0	0	4492200	0	0	1298200	0	1866000	0	0	0	0	0	0	0	0	0	0	0	0	0	0	1681900	0	0	1022500	0
sp|P51532|SMCA4_HUMAN;sp|P51531|SMCA2_HUMAN	sp|P51532|SMCA4_HUMAN				8450500	0	0	0	0	0	1316200	0	0	0	0	0	0	0	0	571600	0	3179600	0	0	0	0	0	0	0	0	0	0	1219200	0	0	0	0	0	0	0	0	0	0	0	0	0	0	0	0
sp|P51570|GALK1_HUMAN	sp|P51570|GALK1_HUMAN				0	0	0	0	0	0	0	0	0	0	2350300	0	2964500	6830700	0	0	0	0	0	0	0	0	0	0	0	0	0	0	0	0	0	0	0	0	0	0	0	0	0	3217200	0	0	2143700	0	0
sp|P51571|SSRD_HUMAN	sp|P51571|SSRD_HUMAN				0	0	0	0	0	0	0	0	1921400	0	0	0	0	0	0	0	0	0	0	0	0	0	2195600	0	0	1922400	0	0	0	0	0	0	0	0	0	0	0	0	0	0	0	0	0	0	0
sp|P51572|BAP31_HUMAN	sp|P51572|BAP31_HUMAN				128220000	23015000	0	0	0	0	0	0	2616000	2602300	2583300	0	0	0	0	7040800	1118700	0	2498600	0	0	0	0	9032500	0	0	0	0	0	0	0	0	0	0	16745000	0	0	0	0	0	0	0	9686700	0	0
sp|P51587|BRCA2_HUMAN	sp|P51587|BRCA2_HUMAN				0	0	0	2946400	0	0	0	2988000	0	0	4718100	0	0	0	0	0	0	0	0	0	0	0	0	2495800	5013500	0	0	0	0	0	0	0	0	0	0	0	0	0	0	0	0	0	0	4107000	0
sp|P51610|HCFC1_HUMAN;sp|Q9Y5Z7|HCFC2_HUMAN	sp|P51610|HCFC1_HUMAN				0	15664000	172600000	166190000	109770000	234570000	248880000	234940000	4583300	88905000	47791000	101150000	40481000	54522000	89652000	185600000	103850000	146970000	88724000	122740000	145550000	106670000	71812000	173470000	192980000	117140000	13306000	6159600	27036000	35278000	10674000	38071000	5758600	0	71971000	0	0	2842600	0	0	3249400	20633000	2108800	27897000	0
sp|P51617|IRAK1_HUMAN;sp|P51955|NEK2_HUMAN	sp|P51617|IRAK1_HUMAN				0	0	13714000	19746000	0	2793500	32428000	10243000	2377700	5772300	0	0	6040900	1704000	13548000	0	3179600	2928000	0	20152000	907970	0	0	0	0	0	2988500	0	0	11807000	0	0	1986600	0	0	0	0	0	24885000	0	18777000	0	2841400	23009000	2192200
sp|P51648|AL3A2_HUMAN;sp|P30838|AL3A1_HUMAN;sp|P43353|AL3B1_HUMAN	sp|P51648|AL3A2_HUMAN				157450000	142780000	256140000	276650000	185310000	112130000	157010000	211280000	406060000	14233000	118710000	214730000	265190000	150750000	268500000	140470000	196230000	116300000	241630000	176300000	137610000	199930000	169050000	114610000	264470000	232520000	347720000	172770000	174900000	224360000	190650000	157760000	137340000	202170000	347080000	159830000	253110000	250740000	337240000	167760000	218710000	402200000	134230000	113690000	146750000
sp|P51659|DHB4_HUMAN	sp|P51659|DHB4_HUMAN				0	0	0	0	0	0	0	0	0	0	0	0	0	0	0	0	0	0	0	0	0	0	0	0	0	0	0	0	0	0	0	0	0	0	0	0	0	0	0	0	0	0	0	1534600	0
sp|P51798|CLCN7_HUMAN	sp|P51798|CLCN7_HUMAN				0	0	0	0	0	0	0	0	0	0	0	0	0	0	0	0	0	0	0	0	0	0	0	0	0	0	0	0	0	0	0	0	0	0	0	0	0	0	0	0	0	0	0	0	0
sp|P51809|VAMP7_HUMAN	sp|P51809|VAMP7_HUMAN				0	0	0	0	0	5866000	0	0	2821400	0	0	0	0	0	0	0	4585900	0	0	0	0	0	0	0	0	0	0	0	0	0	0	0	0	0	2698100	0	0	0	0	1745500	9444900	0	0	0	0
sp|P51814|ZNF41_HUMAN	sp|P51814|ZNF41_HUMAN	+			0	0	0	0	0	0	0	0	0	0	0	0	0	0	0	0	0	0	0	0	0	0	0	0	0	0	0	0	0	0	0	0	0	0	0	0	0	0	0	0	0	0	0	0	0
sp|P51957|NEK4_HUMAN	sp|P51957|NEK4_HUMAN				0	0	0	0	0	0	0	1302300	0	0	0	0	1121900	0	0	0	0	0	0	0	0	0	0	0	471320	1250200	0	0	1734100	2021000	0	1595000	0	0	0	0	0	0	0	0	2685000	1337100	0	0	0
sp|P51970|NDUA8_HUMAN	sp|P51970|NDUA8_HUMAN				0	0	0	0	0	3800200	0	0	3919400	0	0	0	0	0	0	0	1841300	0	2287900	0	0	0	6041500	0	0	5509100	0	0	0	0	0	0	0	0	0	0	0	0	0	0	0	3235700	0	0	0
sp|P51991|ROA3_HUMAN	sp|P51991|ROA3_HUMAN				0	0	0	0	0	0	0	0	0	0	0	0	0	0	0	0	0	0	0	0	0	0	0	0	0	0	0	0	0	0	0	0	0	0	0	0	0	0	0	0	0	0	0	0	0
sp|P52272|HNRPM_HUMAN	sp|P52272|HNRPM_HUMAN				0	3692700	0	0	0	0	0	0	0	0	0	0	0	0	0	0	0	0	0	0	0	0	0	0	0	0	0	0	0	0	0	0	0	0	0	0	0	0	0	0	0	0	0	0	0
sp|P52292|IMA1_HUMAN	sp|P52292|IMA1_HUMAN				8367700	0	0	0	0	0	0	0	0	0	0	0	2602200	0	0	0	783460	0	0	2102100	1761500	3599900	0	6674600	9807600	6205600	0	0	0	0	0	0	0	0	0	0	0	0	0	0	1546000	3489900	0	0	0
sp|P52294|IMA5_HUMAN	sp|P52294|IMA5_HUMAN				9595700	0	0	0	0	0	0	0	0	0	0	0	0	0	0	0	0	0	0	0	0	0	0	0	0	0	0	0	0	0	0	0	0	0	0	0	0	0	0	0	0	0	0	0	0
sp|P52306|GDS1_HUMAN	sp|P52306|GDS1_HUMAN				0	0	35628000	19577000	19758000	13644000	35545000	83543000	0	0	732930	0	4138300	2631800	182840000	51270000	119320000	341150000	920370000	685730000	7711100	0	4390700	107700000	145990000	127460000	0	0	0	0	0	0	0	0	0	0	0	3289200	0	0	0	0	0	0	0
sp|P52429|DGKE_HUMAN	sp|P52429|DGKE_HUMAN				0	0	0	0	0	0	0	0	0	3153600	0	0	4609500	0	3479400	0	0	0	0	0	2806200	0	0	1347000	0	3305500	0	0	2692300	0	0	0	27802000	24382000	3949500	6095900	5566400	0	6357700	0	0	3204300	0	0	15671000
sp|P52565|GDIR1_HUMAN	sp|P52565|GDIR1_HUMAN				1177800	0	0	0	0	0	0	0	1125900	0	0	0	0	0	0	0	0	0	0	0	0	0	2885900	0	0	0	0	0	0	0	0	0	0	0	0	0	0	0	0	0	0	0	0	0	0
sp|P52569|CTR2_HUMAN	sp|P52569|CTR2_HUMAN				0	0	0	0	0	0	2077000	0	0	0	0	0	0	0	0	0	1902100	0	0	0	0	0	0	0	0	0	0	0	0	0	0	0	0	0	0	0	0	0	0	0	0	0	0	0	0
sp|P52594|AGFG1_HUMAN;sp|O95081|AGFG2_HUMAN	sp|P52594|AGFG1_HUMAN				0	0	0	0	0	9969400	7064400	5085300	6161700	0	9557200	9709100	3681000	0	7560600	0	5027100	0	6692500	9025700	0	0	3713200	5059600	0	0	9130200	5188900	0	0	5652300	0	0	0	6611700	0	0	0	3649100	0	6218000	5544500	0	16793000	0
sp|P52597|HNRPF_HUMAN	sp|P52597|HNRPF_HUMAN				0	0	0	0	0	0	0	0	0	0	0	0	0	0	0	0	0	0	0	0	0	0	0	0	0	0	0	0	0	0	0	0	0	0	0	0	0	0	0	0	0	0	0	0	0
sp|P52630|STAT2_HUMAN	sp|P52630|STAT2_HUMAN				0	0	0	0	0	0	0	0	0	0	0	0	0	0	0	0	0	0	0	0	0	0	0	0	0	0	0	0	0	0	0	0	0	0	0	0	0	0	0	0	0	0	0	0	0
sp|P52655|TF2AA_HUMAN	sp|P52655|TF2AA_HUMAN				0	0	0	0	0	3903100	0	1533300	0	0	0	6726100	0	0	0	0	0	0	0	0	0	0	0	859280	0	0	0	0	0	0	0	0	0	0	0	0	0	0	0	0	0	0	0	0	0
sp|P52701|MSH6_HUMAN	sp|P52701|MSH6_HUMAN				0	0	0	0	21118000	0	10284000	12135000	0	0	0	0	0	0	0	12124000	1579900	8530200	0	0	10817000	17346000	0	13533000	46894000	2343800	0	0	0	0	0	0	0	0	0	0	0	0	5783900	0	0	5620900	0	11372000	0
sp|P52732|KIF11_HUMAN	sp|P52732|KIF11_HUMAN				0	0	0	0	0	0	7409900	0	0	0	0	0	0	0	0	0	0	0	0	0	85813000	88974000	35940000	17578000	38441000	4974000	0	0	4657100	0	0	0	0	0	0	0	0	0	12300000	5201900	13730000	0	3400200	0	0
sp|P52735|VAV2_HUMAN	sp|P52735|VAV2_HUMAN				0	0	0	0	0	0	0	0	0	0	0	0	0	0	0	0	0	0	0	0	0	0	0	0	0	0	0	0	0	0	0	0	0	0	0	0	0	0	0	0	0	0	0	0	0
sp|P52757|CHIO_HUMAN	sp|P52757|CHIO_HUMAN				0	0	0	10753000	0	0	0	48314000	0	0	0	0	0	0	18671000	0	0	0	0	0	0	0	0	0	0	48334000	0	0	19101000	0	0	0	39592000	0	0	0	0	0	0	0	0	0	0	0	0
sp|P52789|HXK2_HUMAN;sp|P52790|HXK3_HUMAN	sp|P52789|HXK2_HUMAN				0	0	7179500	39051000	11226000	0	57763000	52676000	0	0	0	0	13569000	23741000	49290000	25403000	50373000	58617000	110860000	68072000	25521000	95898000	133590000	103920000	112540000	107190000	130290000	26378000	83012000	360940000	41552000	144930000	9964900	0	49663000	0	2853400	0	105780000	54107000	227380000	106040000	70707000	159390000	0
sp|P52799|EFNB2_HUMAN	sp|P52799|EFNB2_HUMAN				0	0	0	0	0	0	0	0	0	0	0	0	0	0	0	0	0	0	0	0	0	0	0	0	0	0	0	0	0	0	0	0	0	0	0	0	0	0	0	0	0	3484400	0	0	0
sp|P52907|CAZA1_HUMAN;sp|P47755|CAZA2_HUMAN	sp|P52907|CAZA1_HUMAN				0	0	0	0	0	0	2093200	0	0	0	0	0	0	2102200	0	0	0	0	0	0	0	0	3646800	0	0	0	0	0	0	0	0	0	0	0	0	0	0	0	0	0	0	0	0	0	0
sp|P52948|NUP98_HUMAN	sp|P52948|NUP98_HUMAN				0	0	0	3800900	0	0	0	0	0	0	0	0	0	0	0	0	0	0	0	0	0	0	0	0	0	0	0	0	0	0	0	0	0	0	0	0	0	0	0	0	0	0	0	0	0
sp|P53007|TXTP_HUMAN	sp|P53007|TXTP_HUMAN				12298000	5590100	0	0	0	0	0	0	0	0	0	0	0	0	5944200	0	0	2150400	3250100	1868900	0	0	1039300	0	0	1226200	4247900	0	0	0	0	0	6012600	6915900	0	2737300	0	0	0	0	3534300	5257800	0	0	19387000
sp|P53350|PLK1_HUMAN	sp|P53350|PLK1_HUMAN				2655200	0	0	0	0	0	0	0	0	0	0	0	0	0	0	0	0	0	0	0	0	0	0	0	0	0	0	0	0	0	0	0	0	0	0	0	0	0	0	0	0	0	0	0	0
sp|P53365|ARFP2_HUMAN	sp|P53365|ARFP2_HUMAN				0	0	0	0	0	0	0	0	0	0	658690	0	6708800	22380000	3150300	0	0	0	0	6001700	0	0	0	0	0	0	0	0	0	0	0	0	0	0	0	0	0	0	0	0	2586900	0	0	4941700	0
sp|P53367|ARFP1_HUMAN	sp|P53367|ARFP1_HUMAN				3901900	0	0	0	0	6589200	0	12539000	0	0	3226400	0	4381200	5085800	11074000	0	0	0	0	0	0	0	0	0	0	0	0	0	0	0	0	0	0	0	0	0	0	0	0	3373700	2447200	0	5211400	0	0
sp|P53396|ACLY_HUMAN	sp|P53396|ACLY_HUMAN				0	5933600	0	0	0	0	0	0	0	0	0	0	0	0	0	0	1523700	0	0	0	0	0	0	2247800	0	0	0	0	2423200	0	0	1874800	0	0	0	0	0	0	0	0	0	0	0	0	0
sp|P53597|SUCA_HUMAN	sp|P53597|SUCA_HUMAN				0	0	0	0	0	0	0	0	0	5260300	5533300	0	11452000	0	0	0	0	0	0	0	0	0	0	0	0	0	0	0	0	0	0	0	0	0	0	0	0	0	0	11885000	0	0	0	0	0
sp|P53618|COPB_HUMAN	sp|P53618|COPB_HUMAN				0	0	0	0	0	0	0	3878600	0	0	0	0	0	0	0	13572000	3281700	5227400	0	0	5903500	11600000	0	2712300	0	0	0	0	4689100	0	0	0	0	0	0	0	0	0	0	0	0	0	0	0	0
sp|P53621|COPA_HUMAN	sp|P53621|COPA_HUMAN				0	0	904920	0	10703000	0	0	1538800	0	0	0	0	0	0	1596400	1296500	2027600	1425300	0	1031700	3730400	1639900	0	7140800	1669100	1968800	0	0	4059000	0	0	6294900	0	0	2790300	0	0	0	0	0	490380	0	0	342000	0
sp|P53701|CCHL_HUMAN	sp|P53701|CCHL_HUMAN				0	0	0	0	0	0	0	0	0	0	0	0	0	0	0	0	0	0	0	0	0	0	0	0	0	0	0	0	0	0	0	0	0	0	0	0	0	0	0	0	0	0	0	0	0
sp|P53794|SC5A3_HUMAN	sp|P53794|SC5A3_HUMAN				2925900	5632800	0	0	0	0	0	0	0	0	0	0	0	0	1392200	5883600	5478800	0	0	2857700	0	0	0	0	0	0	0	0	0	0	0	0	0	0	0	0	0	0	0	0	0	0	0	0	0
sp|P53801|PTTG_HUMAN	sp|P53801|PTTG_HUMAN				0	0	0	0	0	0	0	0	0	0	0	0	0	0	0	0	0	0	0	0	0	0	0	0	0	0	0	0	0	0	0	0	0	0	0	0	0	0	0	0	0	0	0	0	0
sp|P53804|TTC3_HUMAN	sp|P53804|TTC3_HUMAN				0	0	1414900	10220000	0	0	3226100	0	0	14761000	8696400	0	26325000	22567000	0	0	0	0	2358000	1364900	21664000	1092300	0	53684000	5384900	4240000	0	0	17591000	0	0	12198000	0	0	0	0	0	0	0	0	1124900	0	2446000	0	0
sp|P53985|MOT1_HUMAN	sp|P53985|MOT1_HUMAN				25650000	75244000	0	0	0	0	3980700	0	0	0	0	0	0	0	13613000	41183000	14358000	21256000	13244000	19153000	0	0	0	0	0	0	0	0	0	0	0	0	0	0	0	0	0	0	0	0	0	0	0	0	42618000
sp|P53990|IST1_HUMAN	sp|P53990|IST1_HUMAN				0	0	0	0	0	0	0	0	0	0	0	0	0	0	0	0	0	0	0	0	0	0	0	0	0	0	0	0	0	0	0	0	0	0	0	0	0	0	0	0	0	0	3538300	0	0
sp|P53999|TCP4_HUMAN	sp|P53999|TCP4_HUMAN				0	3462600	0	0	0	0	0	0	0	0	0	0	0	0	0	0	1765600	0	0	0	0	0	0	0	0	0	0	0	0	0	0	0	0	0	0	0	0	0	0	0	0	0	0	0	0
sp|P54132|BLM_HUMAN	sp|P54132|BLM_HUMAN				0	0	0	0	0	0	0	0	2049900	0	0	0	0	0	0	0	0	0	0	0	0	0	0	4779700	0	0	0	0	0	0	0	0	0	0	0	0	0	0	0	0	0	0	0	0	0
sp|P54136|SYRC_HUMAN	sp|P54136|SYRC_HUMAN				23735000	0	0	0	0	0	3448300	2040800	0	0	0	0	0	0	0	0	0	0	0	2068700	0	0	0	0	1955800	0	0	0	0	1067800	0	0	0	0	0	0	0	0	0	0	0	0	0	3108700	0
sp|P54577|SYYC_HUMAN	sp|P54577|SYYC_HUMAN				0	0	0	0	0	0	0	0	0	0	0	0	0	0	0	0	0	0	0	0	2152900	0	0	8368400	0	0	0	0	0	0	0	0	0	0	0	0	0	0	0	0	0	0	0	0	0
sp|P54578|UBP14_HUMAN	sp|P54578|UBP14_HUMAN				1793200	0	1731200	0	0	3902600	1083200	9932100	0	0	0	0	0	0	3325100	0	0	0	0	0	2744700	0	0	1505100	7801000	0	0	0	9898800	4846800	0	5007000	0	0	1637800	0	0	987260	0	0	0	0	1336400	0	0
sp|P54646|AAPK2_HUMAN	sp|P54646|AAPK2_HUMAN				0	0	0	0	0	0	0	0	0	0	0	0	0	0	0	0	0	0	0	0	0	0	0	0	0	0	0	0	0	0	0	0	0	0	0	0	0	0	0	0	0	0	0	0	0
sp|P54707|AT12A_HUMAN;REV__sp|Q15772|SPEG_HUMAN	sp|P54707|AT12A_HUMAN	+			0	0	6725900	4159100	7647500	0	0	8041300	0	0	0	0	0	0	0	16822000	8619600	13996000	9246500	12046000	0	0	7545000	0	0	17697000	0	0	12421000	0	0	13508000	7156000	0	0	0	0	0	6659800	0	0	7708800	0	9408500	22955000
sp|P54727|RD23B_HUMAN;sp|P54725|RD23A_HUMAN	sp|P54727|RD23B_HUMAN				0	0	0	0	0	0	0	0	0	0	0	0	0	0	0	0	0	0	0	0	0	0	0	0	0	0	0	0	0	0	0	0	0	0	0	0	0	0	0	0	0	0	0	0	0
sp|P54819|KAD2_HUMAN	sp|P54819|KAD2_HUMAN				0	0	0	0	0	0	0	0	0	1102800	0	0	0	0	0	0	0	0	0	0	0	0	0	1071300	0	0	0	0	0	0	0	0	0	0	0	0	0	0	0	0	0	0	0	0	0
sp|P54886|P5CS_HUMAN	sp|P54886|P5CS_HUMAN				1253500	0	0	0	0	0	0	0	0	1734300	0	0	0	0	0	0	2466600	0	0	0	0	1051600	0	230550	9919300	4953000	1313000	0	0	0	0	0	0	0	426980	0	0	0	0	0	0	0	0	0	0
sp|P55010|IF5_HUMAN	sp|P55010|IF5_HUMAN				51972000	65429000	23376000	45897000	9073300	79475000	111220000	66000000	69324000	3649400	0	60693000	20220000	0	174460000	48572000	92717000	29673000	113720000	90752000	66604000	160550000	129960000	40275000	91362000	58587000	92843000	79528000	28251000	96236000	82419000	35637000	25257000	0	79334000	1350500	0	23790000	41170000	26367000	106020000	6438800	20713000	112490000	0
sp|P55011|S12A2_HUMAN	sp|P55011|S12A2_HUMAN				152680000	189730000	16339000	55466000	80237000	32809000	33320000	79264000	19757000	33623000	24293000	39641000	48301000	93803000	78410000	247270000	76948000	360300000	180880000	177530000	49362000	0	25611000	254710000	58295000	175480000	83426000	86567000	82549000	134800000	97482000	137240000	57316000	18444000	12305000	154600000	45167000	0	48528000	7836900	12141000	92623000	46950000	42792000	46081000
sp|P55036|PSMD4_HUMAN	sp|P55036|PSMD4_HUMAN				20976000	0	0	0	0	0	5079400	4148500	0	0	0	0	8607000	0	6013400	0	0	6742600	21968000	13110000	8963600	3076400	8325200	40757000	78926000	71671000	0	0	0	0	0	0	0	0	0	0	0	11936000	4453400	0	0	0	0	0	0
sp|P55039|DRG2_HUMAN	sp|P55039|DRG2_HUMAN				0	0	0	0	0	0	0	0	0	0	0	0	0	0	0	0	0	0	0	0	0	0	0	0	0	0	0	0	0	0	0	0	0	0	0	0	0	0	0	0	0	0	0	0	0
sp|P55060|XPO2_HUMAN	sp|P55060|XPO2_HUMAN				17929000	39886000	0	0	0	0	0	0	0	0	0	0	0	0	0	0	3476500	0	0	0	0	335360	0	4803400	412620	0	0	0	2308400	0	0	0	0	0	0	0	0	0	1382700	0	0	6148400	0	0	6635400
sp|P55072|TERA_HUMAN	sp|P55072|TERA_HUMAN				0	0	0	1928100	7079300	0	0	1598300	0	0	0	0	0	0	0	0	5639200	0	0	1789700	1701000	0	0	7473200	370410	0	0	0	2186400	0	0	0	0	0	0	0	0	0	0	1498300	0	0	0	0	0
sp|P55196|AFAD_HUMAN	sp|P55196|AFAD_HUMAN				75801000	19238000	123090000	144330000	94391000	358230000	414840000	295950000	193490000	121770000	128280000	331850000	171520000	196850000	3811800000	3426100000	5128900000	289380000	582820000	471470000	393410000	171290000	327810000	159030000	97027000	50816000	175360000	117630000	439700000	397850000	172560000	251230000	40285000	5076800	141920000	38123000	87654000	2840600	20896000	12265000	176180000	104330000	126780000	339780000	0
sp|P55197|AF10_HUMAN	sp|P55197|AF10_HUMAN				0	0	0	0	0	0	0	0	0	0	0	0	0	0	0	0	0	0	0	0	0	0	0	0	0	0	0	0	0	0	0	0	0	0	0	0	0	0	0	0	0	0	0	0	0
sp|P55198|AF17_HUMAN	sp|P55198|AF17_HUMAN				0	0	0	0	0	0	0	0	0	0	0	0	0	0	0	0	0	0	0	0	0	0	0	0	0	0	0	0	0	0	0	0	0	0	0	0	0	0	0	0	0	0	0	0	0
sp|P55209|NP1L1_HUMAN	sp|P55209|NP1L1_HUMAN				899480	1763600	0	0	4786300	0	0	5474900	10620000	0	0	0	0	0	2590800	2873800	0	0	2738200	2588500	9006300	21577000	13579000	1722500	14390000	3610200	2871800	0	0	3067100	0	0	0	0	0	0	0	0	1497500	0	0	0	0	3209400	0
sp|P55265|DSRAD_HUMAN	sp|P55265|DSRAD_HUMAN				0	0	0	0	0	0	0	0	0	0	0	0	0	0	0	0	0	0	0	0	0	0	0	0	0	0	0	0	0	0	0	0	0	0	0	0	0	0	0	0	0	0	0	0	0
sp|P55327|TPD52_HUMAN	sp|P55327|TPD52_HUMAN				0	0	0	0	0	0	0	0	0	0	0	0	0	0	0	0	0	0	0	0	0	0	0	0	0	0	0	0	0	0	0	0	0	0	0	0	0	0	0	0	0	0	0	0	0
sp|P55735|SEC13_HUMAN	sp|P55735|SEC13_HUMAN				0	0	0	0	0	0	0	0	0	0	0	0	0	0	0	0	0	0	0	0	0	0	0	0	0	0	0	0	0	0	0	0	0	0	0	0	0	0	0	0	0	0	0	0	0
sp|P55786|PSA_HUMAN	sp|P55786|PSA_HUMAN				0	0	0	0	0	0	0	0	0	0	0	0	0	0	0	1368900	2017900	0	0	0	374710	0	0	581060	0	0	0	0	1206600	0	0	0	0	0	0	0	0	0	0	0	0	0	0	0	0
sp|P55851|UCP2_HUMAN	sp|P55851|UCP2_HUMAN	+			0	0	0	0	0	0	0	0	0	0	0	0	0	0	0	0	0	0	0	0	0	0	0	0	0	0	0	0	0	0	0	0	0	0	0	0	0	0	0	0	0	0	0	0	0
sp|Q6EEV6|SUMO4_HUMAN;sp|P61956|SUMO2_HUMAN;sp|P55854|SUMO3_HUMAN	sp|Q6EEV6|SUMO4_HUMAN;sp|P61956|SUMO2_HUMAN;sp|P55854|SUMO3_HUMAN				0	0	0	0	0	0	0	0	0	0	0	0	0	0	0	0	3336000	0	0	0	0	0	0	0	0	0	0	0	0	0	0	0	0	0	0	0	0	0	0	0	0	0	0	0	0
sp|P55884|EIF3B_HUMAN	sp|P55884|EIF3B_HUMAN				0	0	0	0	0	0	0	0	0	0	0	0	0	0	0	0	1196100	0	0	1306500	0	0	732120	0	812130	945030	0	0	0	0	0	0	0	0	0	0	0	0	0	346570	212190	0	0	0	0
sp|P56134|ATPK_HUMAN	sp|P56134|ATPK_HUMAN				0	0	0	0	0	0	0	0	0	0	0	0	0	0	0	0	1330600	0	0	0	0	0	0	0	0	0	0	0	0	0	0	0	1182300	0	0	0	0	0	0	0	0	0	0	0	0
sp|P56182|RRP1_HUMAN	sp|P56182|RRP1_HUMAN				265480000	99964000	10771000	40413000	38793000	9751600	16743000	9937000	35368000	6951100	27681000	6247700	64901000	61042000	7175100	22636000	22459000	33318000	24331000	29084000	6297100	604670	1091500	18061000	3040400	14386000	34945000	0	35283000	1052300	0	47895000	73742000	174160000	0	176100000	54111000	20403000	68738000	17268000	7490800	123930000	2677600	6147000	93929000
sp|P56192|SYMC_HUMAN	sp|P56192|SYMC_HUMAN				0	0	0	4239300	1436800	0	3404400	6060000	0	0	0	0	3756400	1994100	2581400	11737000	6900600	5153700	0	3862700	2825300	3139000	0	4841200	0	5976600	0	0	5518900	0	0	4863100	0	0	0	0	0	0	0	0	1377800	5263300	0	2455500	0
sp|P56589|PEX3_HUMAN	sp|P56589|PEX3_HUMAN				0	0	2215000	0	5601200	1495300	0	8197700	0	0	6104000	0	8800200	12832000	1684000	5622500	0	0	5304400	0	33827000	13196000	28282000	7234400	0	0	17087000	24174000	0	8114800	2273000	0	5023700	0	357350	0	0	0	6546000	0	9676600	10308000	10063000	0	10056000
sp|P56962|STX17_HUMAN	sp|P56962|STX17_HUMAN				0	0	0	0	0	0	0	0	0	0	0	0	0	0	0	0	0	0	0	0	0	0	0	0	0	0	0	0	0	0	0	0	0	0	0	0	0	0	0	0	0	0	0	0	0
sp|P57055|DSCR6_HUMAN	sp|P57055|DSCR6_HUMAN	+			0	0	0	0	0	0	0	0	0	0	0	0	0	0	0	0	0	0	0	0	0	0	0	0	0	0	0	0	0	0	0	0	0	0	0	0	0	0	0	0	0	0	0	0	0
sp|P57078|RIPK4_HUMAN	sp|P57078|RIPK4_HUMAN				0	0	0	0	0	0	0	0	0	0	0	0	0	0	0	0	0	0	0	0	0	0	0	0	0	0	0	0	0	0	0	0	0	0	0	0	0	0	0	0	0	0	0	0	0
sp|P57088|TMM33_HUMAN	sp|P57088|TMM33_HUMAN				2565300	3911100	0	0	0	1720200	1525800	0	0	0	0	0	0	0	0	0	0	0	1091500	0	0	0	0	0	0	0	0	0	0	0	0	0	5842300	0	0	2229200	0	0	0	0	0	2703200	0	0	7432100
sp|P57105|SYJ2B_HUMAN	sp|P57105|SYJ2B_HUMAN				0	0	0	0	0	0	0	0	4890100	0	0	5748600	0	0	0	0	4542200	0	0	3716300	0	0	10673000	0	0	0	0	0	0	0	0	3151300	0	0	0	0	0	0	0	0	0	0	2425300	0	0
sp|P57678|GEMI4_HUMAN	sp|P57678|GEMI4_HUMAN				0	0	0	0	0	0	0	0	0	0	0	0	0	0	0	0	0	0	0	0	0	0	0	0	0	0	0	0	0	0	0	0	0	0	0	0	0	0	0	0	0	0	0	0	0
sp|P57721|PCBP3_HUMAN	sp|P57721|PCBP3_HUMAN				0	0	0	0	0	0	0	0	0	0	0	0	0	0	0	0	0	0	0	0	0	0	0	0	0	0	0	0	0	0	0	0	0	0	0	0	0	0	0	0	0	0	0	0	0
sp|P57735|RAB25_HUMAN	sp|P57735|RAB25_HUMAN				0	0	0	0	0	0	0	0	0	0	0	0	0	0	0	0	0	0	0	0	0	0	0	0	0	0	3561900000	5924000000	2425500000	6585900	3353400	18386000	0	0	19933000	0	0	0	0	0	0	0	0	0	0
sp|P57737|CORO7_HUMAN	sp|P57737|CORO7_HUMAN				0	0	0	0	0	967590	0	0	0	0	0	0	0	0	0	0	0	0	3065000	2665100	0	0	0	0	0	0	0	0	0	0	0	0	0	0	0	0	0	0	0	0	3600700	0	0	0	0
sp|P57740|NU107_HUMAN	sp|P57740|NU107_HUMAN				0	0	0	0	0	0	0	0	0	0	0	0	0	0	0	0	0	0	0	0	1284700	3514900	3857600	0	0	18748000	0	0	0	0	0	0	0	0	0	0	0	0	0	0	0	0	0	0	0
sp|P57768|SNX16_HUMAN	sp|P57768|SNX16_HUMAN				0	0	0	0	0	0	0	0	0	0	0	0	0	0	0	0	0	0	0	0	0	0	0	0	0	0	0	0	0	0	0	0	0	0	0	0	0	0	0	18345000	19499000	0	0	0	0
sp|P57772|SELB_HUMAN	sp|P57772|SELB_HUMAN				44918000	34426000	0	4368500	0	0	2996400	3498100	0	18213000	6484000	0	11704000	21080000	0	0	0	8464400	0	7808900	0	0	0	0	0	0	16629000	0	0	0	0	0	0	8182100	0	16278000	9119100	0	0	0	0	0	0	0	46344000
sp|P58546|MTPN_HUMAN	sp|P58546|MTPN_HUMAN				0	0	0	0	0	0	0	0	0	0	0	0	0	0	0	0	0	0	0	0	0	0	0	0	0	0	0	0	0	0	0	0	0	0	0	0	0	0	0	0	0	0	0	0	0
sp|P59051|BRAS2_HUMAN	sp|P59051|BRAS2_HUMAN	+			0	0	0	0	0	0	0	0	0	0	0	0	0	0	0	0	0	0	0	0	0	0	0	0	0	0	0	0	0	0	0	0	0	0	0	0	0	0	0	0	0	0	0	0	0
sp|P59666|DEF3_HUMAN;sp|P59665|DEF1_HUMAN	sp|P59666|DEF3_HUMAN;sp|P59665|DEF1_HUMAN				0	0	0	0	0	0	0	0	0	0	0	0	0	0	0	0	0	0	0	0	0	0	0	0	0	28472000	0	0	0	0	0	0	0	0	0	0	0	0	0	0	0	0	0	0	0
sp|P59990|KR121_HUMAN	sp|P59990|KR121_HUMAN				0	0	0	0	0	0	0	0	0	0	0	0	0	0	0	0	0	0	0	0	0	0	0	0	0	0	0	0	0	0	0	0	0	0	0	0	0	0	0	0	0	0	0	0	0
sp|P60014|KR10A_HUMAN;sp|P60371|KR106_HUMAN	sp|P60014|KR10A_HUMAN;sp|P60371|KR106_HUMAN				0	0	0	0	0	0	0	0	0	0	0	0	0	0	0	0	0	0	0	0	0	0	0	0	0	0	0	0	0	0	0	0	0	0	0	0	0	0	0	0	0	0	0	0	0
sp|P60174|TPIS_HUMAN	sp|P60174|TPIS_HUMAN				0	0	0	0	1886100	0	0	0	0	0	0	0	0	0	0	0	0	0	0	0	0	0	0	0	0	0	0	0	0	0	0	0	0	0	3764200	0	0	0	0	0	0	0	0	0	0
sp|P60370|KR105_HUMAN;sp|P60331|KR101_HUMAN;sp|P60369|KR103_HUMAN;sp|P60409|KR107_HUMAN;sp|P60412|KR10B_HUMAN	sp|P60370|KR105_HUMAN;sp|P60331|KR101_HUMAN;sp|P60369|KR103_HUMAN;sp|P60409|KR107_HUMAN				0	0	0	0	0	0	0	0	0	0	0	0	0	0	0	0	0	0	0	0	0	0	0	0	0	0	0	0	0	0	0	0	0	0	0	0	0	0	0	0	0	0	0	0	0
sp|P60468|SC61B_HUMAN	sp|P60468|SC61B_HUMAN				46217000	24420000	0	3407100	0	0	3182700	0	25308000	20956000	12103000	23068000	25417000	34404000	3848700	0	17930000	0	0	19413000	6820200	0	11480000	4273600	0	10096000	0	0	0	0	0	3985200	30936000	15910000	5933600	17377000	6185300	2396900	11216000	6969900	0	22834000	7084200	0	40897000
sp|P60660|MYL6_HUMAN;sp|P14649|MYL6B_HUMAN	sp|P60660|MYL6_HUMAN;sp|P14649|MYL6B_HUMAN				0	0	0	0	0	0	0	0	0	0	0	0	0	0	0	0	0	0	0	0	0	0	0	0	0	0	0	0	0	0	0	0	0	0	0	0	0	0	0	0	0	0	0	0	0
sp|P63261|ACTG_HUMAN;sp|P60709|ACTB_HUMAN;sp|Q9BYX7|ACTBM_HUMAN	sp|P63261|ACTG_HUMAN;sp|P60709|ACTB_HUMAN				129370000	215620000	61841000	50656000	272710000	87175000	74055000	157980000	192740000	0	121680000	98562000	360390000	407320000	90705000	89221000	164740000	87065000	55760000	102930000	89250000	60421000	122440000	177900000	52833000	337960000	90942000	13654000	111000000	15290000	4966900	67214000	114740000	71189000	119510000	72648000	43973000	274660000	3582600	213110000	55959000	39665000	144890000	42237000	155000000
sp|P60842|IF4A1_HUMAN;sp|Q14240|IF4A2_HUMAN	sp|P60842|IF4A1_HUMAN				11210000	8769700	0	4071800	3125200	9849900	6165100	0	0	0	1581800	0	3831900	4551400	5231100	0	16049000	0	0	9805400	12129000	7092900	20893000	13571000	11682000	0	0	0	0	0	0	0	4628600	0	0	0	0	4370200	0	2391900	10794000	0	6217500	0	0
sp|P60866|RS20_HUMAN	sp|P60866|RS20_HUMAN				73369000	28346000	9687200	11622000	40053000	13932000	28657000	25032000	40127000	14625000	10007000	32918000	40372000	46772000	3045000	33204000	42098000	24359000	23424000	15692000	8181600	17830000	12441000	8973500	10637000	34177000	20813000	0	24868000	0	0	0	71823000	58323000	11371000	59131000	0	13161000	23557000	0	17629000	0	16474000	0	220750000
sp|P60891|PRPS1_HUMAN;sp|P21108|PRPS3_HUMAN;sp|P11908|PRPS2_HUMAN	sp|P60891|PRPS1_HUMAN;sp|P21108|PRPS3_HUMAN;sp|P11908|PRPS2_HUMAN				7589500	3610800	0	0	0	0	0	0	0	4130000	0	0	10378000	0	0	0	0	0	0	0	0	0	0	0	0	0	0	0	0	0	0	0	0	0	0	0	16794000	0	0	4788500	0	0	0	0	0
sp|P60953|CDC42_HUMAN	sp|P60953|CDC42_HUMAN				0	0	3532000000	8930500000	869960000	8775800000	5097000000	5229600000	0	0	0	0	0	0	0	0	0	0	0	0	0	0	0	0	0	0	0	0	0	0	0	0	0	0	0	0	0	0	0	0	0	0	0	0	0
sp|P61006|RAB8A_HUMAN	sp|P61006|RAB8A_HUMAN				0	0	0	0	0	0	0	4515100	0	0	0	0	0	0	0	0	0	0	0	0	0	13809000	5874000	0	99588000	0	0	0	0	0	2821500	0	0	0	0	0	0	0	0	0	0	0	0	0	0
sp|P61011|SRP54_HUMAN	sp|P61011|SRP54_HUMAN				11294000	0	0	0	0	0	0	0	0	0	0	0	0	0	2501900	0	0	0	0	0	0	0	0	0	0	0	0	0	0	0	0	0	0	0	0	0	0	0	0	0	0	0	0	0	0
sp|P61019|RAB2A_HUMAN	sp|P61019|RAB2A_HUMAN				0	0	0	261630	0	0	0	0	0	0	0	0	0	0	0	0	0	0	0	0	0	0	0	0	0	0	0	0	0	0	0	161710	0	0	0	0	0	0	29621000000	13867000000	23132000000	30832000000	25981000000	23716000000	0
sp|P61026|RAB10_HUMAN	sp|P61026|RAB10_HUMAN				19729000	21641000	34614000	50259000	66413000	62549000	30381000	48397000	41104000	21146000	27742000	41460000	25446000	25448000	38275000	0	22321000	0	35126000	31993000	35107000000	35031000000	48338000000	11023000000	9449300000	13778000000	17536000	38461000	21596000	28228000	36689000	14642000	21288000	24512000	49360000	12873000	24094000	11811000	13196000	20107000	35839000	12211000	17319000	22582000	31792000
sp|P61073|CXCR4_HUMAN	sp|P61073|CXCR4_HUMAN				0	0	0	0	0	0	0	0	0	0	0	0	0	0	0	0	0	0	0	0	0	0	0	0	0	0	0	0	0	0	0	0	0	0	0	0	0	0	0	0	0	0	0	0	0
sp|P61081|UBC12_HUMAN	sp|P61081|UBC12_HUMAN				0	0	0	7024600	2672300	19995000	0	19320000	23708000	9869000	16715000	15189000	9142700	11168000	13813000	0	21374000	0	15197000	0	4840600	9414700	43252000	2480300	2108100	7764100	0	17570000	0	0	6023000	6380900	0	0	13597000	0	0	0	0	3064400	26380000	0	5603900	7796200	0
sp|Q9P1U1|ARP3B_HUMAN;sp|P61158|ARP3_HUMAN;sp|Q9C0K3|ARP3C_HUMAN	sp|Q9P1U1|ARP3B_HUMAN;sp|P61158|ARP3_HUMAN;sp|Q9C0K3|ARP3C_HUMAN				0	0	0	0	0	0	0	0	0	0	0	0	0	0	0	0	0	0	0	0	0	0	0	0	0	0	0	0	0	0	0	0	0	0	0	0	0	0	0	0	0	0	0	0	0
sp|P84077|ARF1_HUMAN;sp|P61204|ARF3_HUMAN	sp|P84077|ARF1_HUMAN;sp|P61204|ARF3_HUMAN				11076000	4150600	24470000	25076000	34784000	45182000	19136000	55834000	39949000	16148000	22672000	39907000	23337000	19509000	48443000	24087000	57992000	14023000	57561000	28846000	8858100	45318000	57908000	8393800	26927000	36417000	16784000	43617000	8603600	43628000	30714000	25364000	15375000	0	30218000	4579600	0	10026000	16450000	19685000	44025000	22736000	34479000	36799000	14052000
sp|P61221|ABCE1_HUMAN	sp|P61221|ABCE1_HUMAN				0	0	0	0	0	0	0	0	0	0	0	0	0	0	0	0	0	0	0	0	0	0	0	0	0	0	0	0	0	0	0	0	0	0	0	0	0	0	0	0	0	0	0	0	0
sp|P62834|RAP1A_HUMAN;sp|P61224|RAP1B_HUMAN;sp|A6NIZ1|RP1BL_HUMAN	sp|P62834|RAP1A_HUMAN;sp|P61224|RAP1B_HUMAN;sp|A6NIZ1|RP1BL_HUMAN				0	0	0	0	0	0	0	0	0	0	0	0	0	0	0	0	0	0	0	0	0	0	0	49770	0	0	0	0	0	0	0	0	0	0	0	0	0	0	0	0	728040	0	0	0	0
sp|P61247|RS3A_HUMAN	sp|P61247|RS3A_HUMAN				590400000	364230000	10797000	61994000	88763000	35511000	30071000	39479000	53121000	120820000	90547000	56255000	199610000	23629000	53628000	82328000	27366000	72666000	45093000	25607000	45287000	6875700	81913000	27396000	2534900	88757000	27590000	2990200	34846000	0	0	27794000	281600000	239120000	101700000	411550000	15616000	169020000	39241000	202610000	41558000	8952600	38752000	20763000	323380000
sp|P61254|RL26_HUMAN	sp|P61254|RL26_HUMAN				2400000000	2443700000	1153600000	1434200000	1878400000	735490000	1080800000	1566500000	1165200000	1580300000	1716500000	1155900000	1873900000	2514400000	347290000	621800000	297260000	968080000	733270000	317130000	565910000	640320000	813980000	766910000	674110000	1568000000	404160000	2312000000	861450000	818430000	1474400000	1479100000	1038200000	1815000000	798970000	2397800000	1378100000	652760000	1294700000	2220000000	325820000	1190400000	1903300000	254790000	4098800000
sp|P61289|PSME3_HUMAN	sp|P61289|PSME3_HUMAN				3432000	0	0	0	0	0	0	0	0	0	0	0	0	0	0	0	0	0	0	0	0	0	0	0	0	0	0	0	0	0	0	0	0	0	0	0	0	0	0	0	0	0	0	0	0
sp|P61313|RL15_HUMAN	sp|P61313|RL15_HUMAN				10633000	0	5637400	0	0	5476100	6577000	4479100	2727600	0	0	0	0	0	0	0	6770900	0	0	0	0	0	0	0	0	0	0	0	0	0	0	0	0	0	0	0	0	0	0	0	0	0	0	0	0
sp|P61353|RL27_HUMAN	sp|P61353|RL27_HUMAN				17297000	30907000	24657000	26625000	36808000	20699000	11696000	14702000	35132000	43891000	41046000	17830000	27506000	37216000	0	0	23539000	0	12266000	15564000	10789000	6558200	29761000	0	21602000	42472000	0	34404000	8899200	9381300	28359000	15939000	20629000	14198000	18678000	31196000	14108000	29456000	35640000	67899000	0	7444400	53394000	0	50826000
sp|P61513|RL37A_HUMAN;sp|A6NKH3|RL37L_HUMAN	sp|P61513|RL37A_HUMAN				204590000	237080000	45315000	147060000	546940000	72703000	201750000	164030000	239870000	236130000	187860000	294320000	320910000	213160000	5204900	77023000	32336000	67680000	69548000	60965000	171800000	102040000	115340000	144450000	103430000	270880000	74454000	234790000	34178000	200360000	262350000	217440000	510650000	194980000	349350000	600280000	189510000	518210000	697510000	274140000	53508000	592260000	277040000	35790000	600100000
sp|P61586|RHOA_HUMAN;sp|P08134|RHOC_HUMAN;sp|P62745|RHOB_HUMAN	sp|P61586|RHOA_HUMAN;sp|P08134|RHOC_HUMAN				0	0	0	0	14987000	0	0	9371100	0	0	0	0	0	0	0	0	890880	0	0	0	0	0	0	0	0	0	0	0	0	0	0	0	0	0	0	0	0	0	0	0	0	0	0	0	0
sp|P61604|CH10_HUMAN	sp|P61604|CH10_HUMAN				0	0	0	0	0	0	0	0	0	0	0	0	0	0	0	0	18412000	0	0	3453200	0	0	20904000	13883000	18121000	70965000	0	0	0	0	0	0	0	0	0	0	0	0	0	2598700	0	0	0	0	0
sp|P61619|S61A1_HUMAN;sp|Q9H9S3|S61A2_HUMAN	sp|P61619|S61A1_HUMAN				14447000	25532000	0	7707700	8452700	0	0	4297200	5538400	21548000	0	0	28061000	10330000	0	22462000	0	18708000	0	0	4912100	0	0	0	0	0	0	0	0	0	0	0	0	0	0	0	0	0	0	0	0	0	0	0	17677000
sp|P61626|LYSC_HUMAN	sp|P61626|LYSC_HUMAN				0	0	0	0	0	0	0	0	0	0	0	0	0	0	0	0	5652400	0	0	0	0	0	0	4234300	0	1122200000	0	0	0	0	0	0	0	0	0	0	9764000	5192100	0	0	3808300	0	0	0	0
sp|P61758|PFD3_HUMAN	sp|P61758|PFD3_HUMAN				0	0	0	0	0	0	0	0	0	0	2884800	0	2391700	0	6098400	0	0	2041300	0	0	0	0	3787100	0	4818900	0	0	4504700	0	7422900	3107800	0	0	0	13078000	11302000	14174000	0	0	0	0	0	0	0	0
sp|P61923|COPZ1_HUMAN	sp|P61923|COPZ1_HUMAN				0	0	0	0	0	0	0	0	0	0	0	0	0	0	0	0	773710	0	0	0	0	0	0	0	0	0	0	0	0	0	0	0	0	0	1506500	0	0	0	0	0	0	0	0	0	0
sp|P61927|RL37_HUMAN	sp|P61927|RL37_HUMAN				0	0	0	0	3607600	0	42833000	2688300	0	0	6822800	0	22487000	0	0	0	0	0	0	0	0	0	0	0	0	0	0	0	0	0	0	0	7487700	20560000	0	24658000	40450000	0	14979000	32190000	0	30539000	0	0	0
sp|P61962|DCAF7_HUMAN	sp|P61962|DCAF7_HUMAN				0	0	0	0	0	0	0	0	0	0	0	0	0	0	0	0	0	0	0	0	0	0	0	0	0	0	0	0	0	0	0	0	0	0	0	0	0	0	0	0	0	0	0	0	0
sp|P61978|HNRPK_HUMAN	sp|P61978|HNRPK_HUMAN				35641000	5658400	2561400	13142000	5016400	25265000	27806000	17366000	21160000	6649100	2308000	9389700	3320500	0	22189000	4156900	47937000	0	19802000	12036000	19909000	10718000	10657000	19408000	0	9671500	0	0	10644000	0	0	0	25126000	0	0	51393000	5356800	2783000	4686600	0	2877500	0	0	8058800	6401800
sp|P61981|1433G_HUMAN	sp|P61981|1433G_HUMAN	+			0	0	0	0	0	0	0	0	0	0	0	0	0	0	0	0	0	0	0	0	0	0	0	0	0	0	0	0	0	0	0	0	0	0	0	0	0	0	0	0	0	0	0	0	0
sp|P62081|RS7_HUMAN	sp|P62081|RS7_HUMAN				0	0	0	0	672490	2748000	0	0	0	1613200	0	0	0	0	0	0	3270000	0	0	0	0	0	0	636930	3698900	0	0	0	0	0	0	0	0	0	1729600	0	0	441290	0	0	1237200	0	0	0	0
sp|P62140|PP1B_HUMAN	sp|P62140|PP1B_HUMAN				0	0	0	0	0	0	0	0	0	0	0	0	3254600	0	0	0	0	0	0	0	0	0	0	0	0	0	0	0	0	0	0	0	0	0	0	0	0	0	0	3837000	0	0	0	0	0
sp|P62195|PRS8_HUMAN	sp|P62195|PRS8_HUMAN				0	0	0	0	0	0	0	0	744300	0	0	0	0	0	0	0	0	0	0	0	0	0	1382100	0	0	0	0	0	0	0	0	0	0	0	245600	0	0	0	0	685080	741340	0	0	0	0
sp|P62241|RS8_HUMAN	sp|P62241|RS8_HUMAN				323170000	636160000	326940000	227490000	501510000	181740000	114020000	187840000	335360000	352680000	294450000	461770000	668210000	603090000	220630000	170020000	95892000	213490000	231650000	144570000	268980000	224490000	240890000	312790000	295170000	327020000	148020000	308980000	246520000	164500000	300600000	157100000	424180000	340820000	291090000	676070000	633080000	464760000	186740000	655230000	185330000	123140000	511690000	203500000	369840000
sp|P62244|RS15A_HUMAN	sp|P62244|RS15A_HUMAN				35746000	23377000	6589600	14567000	18210000	7931700	13623000	0	34787000	45331000	32951000	15750000	40956000	51380000	0	0	20904000	0	6120700	11251000	0	0	20531000	6450500	0	36126000	0	0	0	0	0	13888000	21301000	19619000	15387000	18356000	21758000	15627000	0	27949000	0	10876000	19826000	0	38717000
sp|P62249|RS16_HUMAN	sp|P62249|RS16_HUMAN				836480000	380520000	490390000	494560000	874460000	527510000	492850000	459420000	921060000	1220100000	977440000	662060000	1388300000	1415400000	329650000	546980000	632430000	512160000	420810000	392840000	238980000	281380000	687980000	249960000	224520000	1130200000	503620000	353530000	366680000	168850000	346480000	373410000	1589000000	1598300000	727900000	1787600000	1295800000	692570000	267120000	1101700000	436830000	417390000	825100000	417570000	2569500000
sp|P62258|1433E_HUMAN	sp|P62258|1433E_HUMAN				0	9943200	0	2946100	8828600	4007500	0	0	7218500	3587100	3023100	0	0	0	7682500	0	11321000	0	0	0	2284200	0	6439500	2825500	0	0	0	2285400	0	0	0	0	8590800	3486300	0	9448200	12413000	0	0	12495000	0	0	3754300	0	3384600
sp|P62263|RS14_HUMAN	sp|P62263|RS14_HUMAN				357880000	324690000	29716000	144260000	139150000	77529000	101840000	102030000	187530000	197280000	114440000	132640000	279220000	242350000	57015000	130220000	116900000	126790000	104350000	121460000	167460000	54159000	170280000	142450000	25225000	271280000	70422000	0	57401000	0	0	71301000	476520000	344360000	30719000	496650000	230110000	25414000	93302000	39627000	59709000	100260000	15325000	42511000	664960000
sp|P62266|RS23_HUMAN	sp|P62266|RS23_HUMAN				183520000	213150000	4451800000	1618100000	3512500000	2669600000	1875900000	2475400000	3270000000	1732700000	2202700000	2240200000	2017000000	1724700000	772310000	1274700000	1527700000	1327900000	905140000	805400000	536150000	1782300000	796800000	453530000	2391900000	1695800000	984910000	1985300000	1253000000	1440700000	2508100000	1360400000	3236000000	1693100000	4737600000	3365700000	2513300000	2604800000	2277500000	3470000000	1167900000	1063000000	4002400000	1422700000	2562500000
sp|P62269|RS18_HUMAN	sp|P62269|RS18_HUMAN				212030000	288380000	60187000	75551000	186570000	44089000	33182000	121650000	47891000	72968000	57806000	12439000	62812000	80708000	0	44476000	49738000	41114000	29087000	35087000	64668000	29548000	58161000	35907000	32178000	153770000	17039000	166970000	27648000	45368000	151370000	68027000	84068000	115260000	249640000	177720000	84244000	288220000	6954200	72438000	47270000	33104000	67416000	45782000	283550000
sp|P62273|RS29_HUMAN	sp|P62273|RS29_HUMAN				145400000	0	0	31701000	128330000	0	14334000	59826000	26994000	23751000	25014000	29355000	31579000	39069000	0	43252000	43435000	60023000	12487000	40390000	111590000	40964000	49973000	22681000	58067000	70335000	0	106830000	0	95843000	72361000	7862400	85826000	21338000	596710000	150140000	0	194000000	74628000	187390000	0	76012000	36325000	56807000	80406000
sp|P62277|RS13_HUMAN	sp|P62277|RS13_HUMAN				26035000	0	0	6687700	19297000	0	2923800	0	8722800	14698000	11884000	0	16432000	15076000	0	0	13045000	0	3420100	9100600	0	0	13638000	0	8239200	18786000	0	9236200	0	0	10805000	2970900	12634000	13281000	15126000	16119000	0	22168000	17555000	23490000	0	29804000	20151000	0	20368000
sp|P62280|RS11_HUMAN	sp|P62280|RS11_HUMAN				504650000	298110000	49875000	91123000	121150000	58185000	65657000	66929000	158970000	144700000	92179000	26009000	253510000	197970000	40909000	154600000	63654000	115190000	57964000	61462000	111980000	0	95724000	131080000	27526000	116640000	0	15522000	38008000	0	15159000	53743000	295660000	182670000	43208000	355410000	144850000	67638000	94481000	107010000	36786000	42639000	57675000	26080000	343350000
sp|P62304|RUXE_HUMAN	sp|P62304|RUXE_HUMAN				0	0	0	2712500	1939000	7436700	13246000	5066700	6539400	1621000	2176600	19065000	2077100	1256500	0	0	10755000	0	1033900	3113400	0	0	4714400	1461000	0	2681200	0	2332700	0	0	3892200	748210	0	0	2811700	0	0	0	0	2259900	0	0	2753800	0	0
sp|P62306|RUXF_HUMAN	sp|P62306|RUXF_HUMAN				0	0	0	0	0	0	0	0	0	0	0	1622000	0	0	0	0	0	0	0	0	0	0	0	0	0	0	0	0	0	0	0	0	0	0	0	0	0	0	0	0	0	0	0	0	0
sp|P62314|SMD1_HUMAN	sp|P62314|SMD1_HUMAN				0	0	0	0	0	0	0	0	0	0	0	0	0	0	0	0	0	0	0	0	0	0	0	0	0	0	0	0	0	0	0	0	0	0	0	0	0	0	0	0	0	0	0	0	0
sp|P62316|SMD2_HUMAN	sp|P62316|SMD2_HUMAN				0	0	0	0	0	0	0	0	0	0	0	0	0	0	0	0	2686000	0	0	0	0	0	0	0	0	0	0	0	0	0	0	0	0	0	0	0	0	0	0	0	0	0	0	0	0
sp|P62318|SMD3_HUMAN	sp|P62318|SMD3_HUMAN				0	0	0	0	0	0	0	0	628410	0	0	0	0	0	0	0	0	0	0	0	0	0	0	0	0	0	0	0	0	0	0	0	535170	0	404180	0	0	0	0	0	0	0	0	0	0
sp|P62330|ARF6_HUMAN	sp|P62330|ARF6_HUMAN				0	0	0	0	0	2094100	0	0	0	0	0	0	0	0	0	0	1795200	0	1599900	0	0	0	1516000	0	0	0	0	2113000	0	0	0	555230	0	0	0	0	0	0	0	0	2371700	0	0	0	0
sp|P62333|PRS10_HUMAN	sp|P62333|PRS10_HUMAN				0	0	0	0	0	0	0	0	0	0	0	0	0	0	0	0	0	0	0	0	0	0	0	0	0	0	0	0	0	0	0	0	0	0	0	0	0	0	0	0	0	0	0	0	0
sp|P62424|RL7A_HUMAN	sp|P62424|RL7A_HUMAN				11099000	9497400	0	0	9426600	0	0	0	8108400	3510600	6480000	0	3706000	0	0	0	0	0	0	0	0	0	0	0	0	0	0	0	0	0	0	0	5491600	0	3155500	0	0	0	5515000	24249000	0	0	15507000	0	0
sp|P62491|RB11A_HUMAN	sp|P62491|RB11A_HUMAN				0	0	0	0	0	0	0	0	0	0	0	0	0	0	0	0	0	0	0	0	0	0	0	0	0	0	0	0	0	0	0	23974000	0	0	0	0	0	0	0	0	0	0	0	0	0
sp|P62495|ERF1_HUMAN	sp|P62495|ERF1_HUMAN				0	0	0	0	0	2602200	0	0	0	0	0	0	0	0	0	0	0	0	0	0	0	0	0	2125300	0	0	0	0	0	0	0	0	0	0	0	0	0	0	0	0	0	0	0	0	0
sp|P62633|CNBP_HUMAN	sp|P62633|CNBP_HUMAN				0	0	0	0	0	0	0	0	0	2674000	1884000	0	0	0	0	0	0	0	0	0	0	0	0	0	0	0	0	0	0	0	0	0	0	0	0	0	0	0	0	0	0	0	0	0	0
sp|P62685|GAK8_HUMAN;sp|Q9YNA8|GAK19_HUMAN;sp|Q7LDI9|GAK6_HUMAN;sp|P87889|GAK10_HUMAN;sp|P63145|GAK24_HUMAN;sp|P63130|GAK7_HUMAN;sp|P63126|GAK9_HUMAN;sp|P62684|GA113_HUMAN;sp|P62683|GAK21_HUMAN;sp|P63128|POK9_HUMAN	sp|P62685|GAK8_HUMAN;sp|Q9YNA8|GAK19_HUMAN;sp|Q7LDI9|GAK6_HUMAN;sp|P87889|GAK10_HUMAN;sp|P63145|GAK24_HUMAN;sp|P63130|GAK7_HUMAN;sp|P63126|GAK9_HUMAN;sp|P62684|GA113_HUMAN;sp|P62683|GAK21_HUMAN;sp|P63128|POK9_HUMAN				0	0	0	0	0	0	2193300	0	0	0	0	0	0	0	0	0	0	0	0	0	0	1605300	0	0	0	0	0	0	0	0	0	0	0	0	0	0	0	0	0	0	0	0	0	2090600	0
sp|P62701|RS4X_HUMAN;sp|Q8TD47|RS4Y2_HUMAN;sp|P22090|RS4Y1_HUMAN	sp|P62701|RS4X_HUMAN				334330000	234050000	67967000	115870000	135430000	86982000	144350000	89043000	175700000	140900000	201460000	183540000	260440000	81588000	135600000	203600000	102760000	240960000	103400000	93931000	110900000	59880000	156390000	105030000	80340000	162890000	75324000	30223000	102440000	17061000	18988000	107390000	329340000	421210000	115390000	478060000	342130000	97114000	77315000	332120000	100870000	42935000	264190000	87103000	486200000
sp|P62750|RL23A_HUMAN	sp|P62750|RL23A_HUMAN				1183100000	1214200000	408520000	1024300000	1168300000	325950000	363330000	941190000	477800000	777930000	890830000	494890000	752950000	968230000	349220000	343530000	345150000	473670000	526840000	298060000	662600000	588730000	451600000	412840000	464380000	707980000	544500000	1262400000	397600000	691480000	1226700000	540510000	1672100000	1186400000	1046800000	2106000000	1524300000	1244200000	1242400000	874820000	360120000	1285400000	871110000	288610000	2114900000
sp|P62753|RS6_HUMAN	sp|P62753|RS6_HUMAN				1197800000	1207600000	1117300000	1133000000	2473500000	821390000	816600000	1032700000	1235500000	2327800000	1651600000	1780700000	3078700000	1948800000	960590000	968300000	488530000	1124800000	978660000	545460000	619260000	680490000	1337900000	530700000	788340000	1849200000	671130000	913410000	1000700000	462930000	787800000	983420000	2583800000	3276200000	1394900000	4508100000	4339400000	1149500000	716320000	7184700000	745710000	1113200000	3333700000	729100000	2794400000
sp|P62805|H4_HUMAN	sp|P62805|H4_HUMAN				2606900	0	5071700	9633100	0	5530600	5326000	0	0	0	0	0	0	0	0	0	12526000	0	0	1353200	0	0	0	3358100	0	232490000	0	0	0	0	0	0	0	0	0	0	0	5207400	0	0	0	0	0	0	1616500
sp|P62820|RAB1A_HUMAN	sp|P62820|RAB1A_HUMAN				0	0	5916700	3031700	6626500	14428000	2306200	18792000	4759700	0	0	14209000	0	0	9585500	0	8815300	0	3324300	0	2385100	0	11400000	3345500	0	0	0	6269000	9116100	0	10085000	0	3478600	0	2551900	0	0	0	0	0	22491000	0	0	23144000	0
sp|P62826|RAN_HUMAN	sp|P62826|RAN_HUMAN				8816700	16298000	0	2606900	35521000	7908900	4086800	10388000	18668000	5221200	5213400	0	7564000	0	0	0	11197000	0	8014400	0	0	0	17820000	12655000	5456300	0	0	0	0	0	0	0	6647700	0	0	0	0	0	0	10850000	0	0	3581300	0	0
sp|P62829|RL23_HUMAN	sp|P62829|RL23_HUMAN				374150000	372990000	972520000	1112400000	1224900000	831620000	642040000	560790000	483930000	1589200000	1825800000	998960000	2562400000	2227400000	838400000	841310000	1537500000	817040000	554130000	1008500000	531770000	523500000	800460000	599000000	564860000	1117000000	469580000	143430000	547970000	138620000	147290000	647860000	2166800000	1380800000	701740000	1591600000	2647800000	461490000	960630000	1858200000	710710000	1671000000	960980000	564330000	1662700000
sp|P62841|RS15_HUMAN	sp|P62841|RS15_HUMAN				0	0	0	0	206910	0	0	445630	0	0	0	0	0	0	0	0	0	0	0	0	0	0	0	0	0	0	0	0	0	0	0	0	0	0	0	0	0	0	0	0	0	0	0	0	0
sp|P62847|RS24_HUMAN	sp|P62847|RS24_HUMAN				2096600	21820000	200520000	140140000	114390000	108700000	103050000	98818000	46857000	9515900	29480000	94694000	37149000	52442000	58878000	64286000	36886000	77115000	36756000	30862000	96643000	165590000	31813000	27589000	150780000	20700000	94692000	108230000	69598000	171870000	163720000	85281000	131150000	150820000	269850000	75643000	119050000	76334000	80149000	61241000	127530000	40694000	73101000	98114000	95877000
sp|P62851|RS25_HUMAN	sp|P62851|RS25_HUMAN				1430100000	559290000	73371000	154180000	280490000	79106000	102150000	159220000	237560000	245630000	146100000	158490000	276810000	371380000	77829000	202780000	160420000	213350000	110320000	237350000	63455000	92566000	235900000	108030000	52794000	361480000	112880000	64325000	42254000	13631000	58642000	50152000	646330000	514010000	133340000	913490000	371570000	155830000	118150000	110440000	67838000	100820000	64358000	52886000	904670000
sp|P62854|RS26_HUMAN;sp|Q5JNZ5|RS26L_HUMAN	sp|P62854|RS26_HUMAN;sp|Q5JNZ5|RS26L_HUMAN				184530000	136940000	379230000	463200000	423950000	199960000	250500000	251290000	334810000	667730000	59807000	465350000	105290000	598420000	163960000	230990000	301760000	376950000	192890000	233380000	358830000	519620000	178820000	278090000	490250000	262490000	230940000	147480000	222130000	261450000	177860000	321580000	385380000	268230000	438260000	1060800000	358370000	288480000	469180000	186150000	135060000	532980000	110710000	97667000	879610000
sp|P62857|RS28_HUMAN	sp|P62857|RS28_HUMAN				0	0	0	0	0	0	0	0	0	0	0	887500	1007100	1476100	0	0	2073800	0	0	0	0	0	0	0	0	0	0	0	0	0	0	0	0	0	0	0	0	0	0	0	0	0	0	0	0
sp|P62861|RS30_HUMAN	sp|P62861|RS30_HUMAN				1785600000	1941200000	1446000000	1576000000	2528200000	651020000	1070000000	2325500000	76468000	258780000	443980000	210440000	395030000	358420000	285860000	788020000	514070000	755990000	473650000	1120900000	746980000	509110000	596870000	1412000000	514540000	696440000	717990000	318430000	400130000	1394700000	147720000	408990000	973580000	696340000	935770000	1192800000	843030000	885290000	2163900000	251510000	300530000	923000000	1026900000	263350000	1082000000
sp|Q9HAV0|GBB4_HUMAN;sp|P62879|GBB2_HUMAN;sp|P62873|GBB1_HUMAN;sp|P16520|GBB3_HUMAN	sp|Q9HAV0|GBB4_HUMAN;sp|P62879|GBB2_HUMAN;sp|P62873|GBB1_HUMAN;sp|P16520|GBB3_HUMAN				0	0	0	0	0	0	0	0	0	0	0	0	0	0	0	0	0	0	0	0	0	0	0	0	0	0	0	0	0	0	0	0	0	0	0	0	0	0	0	0	0	0	0	0	0
sp|P62888|RL30_HUMAN	sp|P62888|RL30_HUMAN				0	0	0	0	0	0	0	0	3779000	0	0	0	0	0	0	0	6632900	0	0	0	0	0	0	0	0	0	0	0	0	0	0	0	0	0	0	0	0	0	0	2924000	0	0	0	0	0
sp|Q59GN2|R39L5_HUMAN;sp|P62891|RL39_HUMAN	sp|Q59GN2|R39L5_HUMAN;sp|P62891|RL39_HUMAN				85961000	132030000	1257400000	733400000	772310000	1546400000	829700000	1076100000	871410000	53216000	127250000	655150000	80624000	54068000	531010000	992280000	876050000	796690000	336690000	301880000	956160000	782480000	33127000	1028400000	1329100000	1301700000	79820000	1062000000	243570000	1096900000	1734700000	431390000	1001000000	57995000	512970000	361720000	0	624110000	757470000	220770000	859470000	70562000	305410000	1025300000	273480000
sp|P62899|RL31_HUMAN	sp|P62899|RL31_HUMAN				0	0	0	3518400	5668200	3469500	1032800	0	2346800	0	0	0	0	0	0	0	5080800	0	0	0	0	0	0	0	0	0	0	0	0	0	0	2314500	0	0	6659900	0	0	5924100	0	0	0	0	0	0	0
sp|P62910|RL32_HUMAN	sp|P62910|RL32_HUMAN				105840000	67790000	59404000	67564000	294380000	28101000	37728000	120790000	83411000	226580000	193110000	81517000	211510000	137450000	10624000	56693000	49706000	68637000	65242000	33824000	29571000	63515000	68769000	41014000	54804000	145290000	32078000	112490000	30818000	123900000	74578000	36244000	117580000	120440000	328210000	223190000	92390000	302950000	158690000	180080000	45916000	84499000	190700000	15968000	94943000
sp|P62913|RL11_HUMAN	sp|P62913|RL11_HUMAN				473980000	198610000	57881000	148070000	166470000	75515000	68306000	86091000	220330000	341740000	206210000	184280000	392590000	467510000	96169000	117880000	82654000	150870000	113760000	53817000	57841000	31443000	201020000	80297000	41215000	288020000	53542000	22654000	69384000	8078500	11257000	75596000	418410000	383000000	76782000	629220000	331820000	101990000	62682000	231810000	50900000	56575000	154460000	64500000	624410000
sp|P62917|RL8_HUMAN	sp|P62917|RL8_HUMAN				29219000	44473000	8243100	9406200	18901000	7685800	6134300	7996400	8883000	12517000	11489000	5034200	19048000	6147900	0	0	0	0	6081800	0	0	3140100	14232000	18504000	6907400	12184000	0	13833000	8279500	7384100	13396000	7501200	11446000	0	66828000	18887000	0	102880000	11946000	62035000	4550200	0	27086000	0	23673000
sp|P62937|PPIA_HUMAN;sp|Q9Y536|PAL4A_HUMAN;sp|P0DN26|PAL4F_HUMAN;sp|F5H284|PAL4D_HUMAN;sp|A0A0B4J2A2|PAL4C_HUMAN;sp|A0A075B759|PAL4E_HUMAN	sp|P62937|PPIA_HUMAN				0	3683200	4669100	5651700	19475000	12022000	2842600	11968000	11668000	4674500	9067800	0	5063100	7962500	0	0	41345000	0	6427200	2851700	2201600	21357000	15487000	3034600	16749000	3004200	0	2377700	0	0	0	2769500	2715100	0	0	0	0	0	0	11812000	0	0	10670000	0	0
sp|P62979|RS27A_HUMAN;sp|P0CG47|UBB_HUMAN;sp|P0CG48|UBC_HUMAN	sp|P62979|RS27A_HUMAN;sp|P0CG47|UBB_HUMAN;sp|P0CG48|UBC_HUMAN				242250000	370270000	152050000	286450000	444450000	226100000	219300000	179090000	459830000	338120000	426400000	269110000	495070000	456180000	387150000	395140000	468550000	335470000	363450000	355190000	286370000	434880000	362350000	480780000	456570000	591820000	332410000	331300000	337270000	234570000	363320000	254580000	630070000	226950000	704180000	997600000	349650000	969020000	362360000	472940000	280960000	387990000	509920000	229570000	569960000
sp|P62987|RL40_HUMAN	sp|P62987|RL40_HUMAN				0	0	0	0	15529000	0	0	7001500	19041000	0	0	31764000	0	0	0	0	0	0	0	0	0	0	0	0	0	0	0	0	0	0	0	5423300	8876000	0	0	0	0	0	20250000	0	0	0	18639000	0	0
sp|P63000|RAC1_HUMAN;sp|P60763|RAC3_HUMAN;sp|P15153|RAC2_HUMAN;sp|P84095|RHOG_HUMAN;sp|P17081|RHOQ_HUMAN	sp|P63000|RAC1_HUMAN;sp|P60763|RAC3_HUMAN;sp|P15153|RAC2_HUMAN				0	0	23890000	18389000	0	295860000	575180000	202860000	16106000000	20414000000	26085000000	13956000000	18323000000	28382000000	0	0	0	0	0	0	0	0	0	0	0	0	0	0	0	0	0	0	0	0	0	0	0	0	0	38946000	0	0	0	0	0
sp|P63010|AP2B1_HUMAN	sp|P63010|AP2B1_HUMAN				0	0	1913600	4507600	0	0	3982700	1225700	0	0	0	0	3623300	0	1831900	5219300	0	0	0	0	933570	0	0	1566600	0	0	0	0	2944500	0	0	1532400	0	0	0	0	0	0	4390300	2193500	1798400	0	0	1977100	0
sp|P63027|VAMP2_HUMAN;sp|P23763|VAMP1_HUMAN	sp|P63027|VAMP2_HUMAN				0	0	3490000	0	0	3421300	0	0	0	0	0	0	0	0	0	0	3491500	0	0	0	2716100	0	0	0	0	0	0	0	2368100	0	0	0	0	0	0	0	0	0	0	0	0	0	0	0	0
sp|P63092|GNAS2_HUMAN;sp|Q5JWF2|GNAS1_HUMAN;sp|P11488|GNAT1_HUMAN;sp|P63096|GNAI1_HUMAN;sp|P19087|GNAT2_HUMAN;sp|P09471|GNAO_HUMAN;sp|P08754|GNAI3_HUMAN;sp|A8MTJ3|GNAT3_HUMAN;sp|P04899|GNAI2_HUMAN;sp|P38405|GNAL_HUMAN	sp|P63092|GNAS2_HUMAN;sp|Q5JWF2|GNAS1_HUMAN				7662100	0	0	0	0	0	0	0	0	0	0	0	0	0	0	0	0	0	0	0	0	0	0	0	0	0	0	0	0	0	0	0	0	0	0	0	0	0	0	0	0	0	0	0	0
sp|P63104|1433Z_HUMAN	sp|P63104|1433Z_HUMAN				0	0	0	0	0	0	0	0	0	0	0	0	0	0	0	0	0	0	0	0	0	0	0	0	0	0	0	0	0	0	0	0	0	0	0	0	0	0	0	0	0	0	0	0	0
sp|Q00005|2ABB_HUMAN;sp|P63151|2ABA_HUMAN;sp|Q66LE6|2ABD_HUMAN	sp|Q00005|2ABB_HUMAN;sp|P63151|2ABA_HUMAN;sp|Q66LE6|2ABD_HUMAN				0	0	0	0	0	0	0	0	0	0	0	0	0	0	0	0	0	0	0	0	82807	0	314580	82244	0	136430	0	0	0	0	0	0	0	0	0	0	0	0	1253300	0	0	0	0	0	0
sp|P63167|DYL1_HUMAN	sp|P63167|DYL1_HUMAN				0	0	0	0	0	0	0	0	0	0	0	0	0	2938100	0	0	0	0	0	0	0	0	0	0	0	0	0	0	0	0	0	0	0	0	0	0	0	0	0	0	0	0	0	0	0
sp|P63173|RL38_HUMAN	sp|P63173|RL38_HUMAN				115060000	99149000	28969000	52644000	45553000	37279000	43411000	42160000	115430000	218660000	221370000	118620000	225920000	280270000	11957000	43960000	63099000	34193000	27111000	113250000	9618600	41888000	60993000	16340000	37502000	65519000	16059000	30756000	6749400	0	31127000	28708000	154610000	36013000	98950000	123170000	0	70992000	65597000	250080000	10209000	74346000	115620000	14642000	66504000
sp|P63208|SKP1_HUMAN	sp|P63208|SKP1_HUMAN				0	0	0	0	0	0	0	0	0	0	0	0	0	0	0	0	0	0	0	0	0	0	0	0	0	0	0	0	0	0	0	0	0	0	0	0	0	0	0	0	0	0	0	0	0
sp|P63220|RS21_HUMAN	sp|P63220|RS21_HUMAN				0	0	0	0	0	0	0	0	0	4302800	0	1806100	3127300	4766600	0	0	2360700	0	0	0	0	0	0	0	0	0	0	0	0	0	0	0	0	0	0	0	0	0	0	0	0	0	0	0	9131300
sp|P63241|IF5A1_HUMAN;sp|Q6IS14|IF5AL_HUMAN;sp|Q9GZV4|IF5A2_HUMAN	sp|P63241|IF5A1_HUMAN;sp|Q6IS14|IF5AL_HUMAN;sp|Q9GZV4|IF5A2_HUMAN				18763000	0	0	0	0	12151000	9899500	7085900	3030700	0	0	0	0	0	6524000	0	10034000	5891600	1560000	7523900	2732500	15504000	22396000	19026000	16521000	12006000	0	0	0	9901800	0	1679600	0	0	0	0	0	0	3194700	4846300	9729300	0	6444600	7882800	0
sp|P63244|RACK1_HUMAN	sp|P63244|RACK1_HUMAN				13379000	0	0	0	3304700	10925000	0	2695400	16815000	14832000	17775000	14223000	11193000	0	0	0	6017900	0	2758900	0	10859000	0	29949000	28453000	9441700	26191000	0	0	0	0	0	0	15386000	0	13731000	16457000	0	11085000	0	22894000	0	11908000	10538000	0	33059000
sp|P67809|YBOX1_HUMAN	sp|P67809|YBOX1_HUMAN				0	0	0	0	0	0	0	0	3446800	0	0	0	0	0	0	0	0	0	0	0	811700	0	0	6195400	0	0	0	0	0	0	0	0	0	0	0	0	0	0	0	0	0	0	0	0	0
sp|P68133|ACTS_HUMAN;sp|P68032|ACTC_HUMAN;sp|P63267|ACTH_HUMAN;sp|P62736|ACTA_HUMAN	sp|P68133|ACTS_HUMAN;sp|P68032|ACTC_HUMAN;sp|P63267|ACTH_HUMAN;sp|P62736|ACTA_HUMAN				0	0	0	3890000	0	0	0	0	9572100	0	0	0	0	0	6322700	12095000	16849000	10727000	8378700	0	9798900	7783400	0	8430700	7220800	0	0	0	0	0	0	0	0	0	0	0	0	0	0	0	5431300	0	0	0	0
sp|Q5VTE0|EF1A3_HUMAN;sp|P68104|EF1A1_HUMAN;sp|Q05639|EF1A2_HUMAN	sp|Q5VTE0|EF1A3_HUMAN;sp|P68104|EF1A1_HUMAN				633330000	393390000	248120000	332380000	126730000	340750000	481190000	239290000	320010000	1963600	28034000	138230000	145050000	184050000	315150000	211950000	366330000	232240000	297220000	240090000	306850000	239170000	199330000	356720000	228310000	159800000	254730000	92702000	278170000	226590000	69425000	242610000	482650000	317500000	162530000	379230000	204500000	23262000	326460000	234580000	457840000	154020000	120160000	288270000	742380000
sp|P68363|TBA1B_HUMAN;sp|Q9H853|TBA4B_HUMAN	sp|P68363|TBA1B_HUMAN				282370000	389650000	546480000	599420000	476700000	402160000	533720000	268370000	531720000	251480000	413910000	387420000	787450000	260830000	697260000	668040000	800010000	594130000	639740000	662490000	612490000	475190000	572320000	483940000	470540000	604740000	554560000	143230000	626210000	211370000	209900000	502360000	881360000	439730000	375550000	376130000	726790000	110380000	796730000	138490000	668010000	609080000	195250000	489030000	1054500000
sp|P68366|TBA4A_HUMAN	sp|P68366|TBA4A_HUMAN	+			0	0	0	0	0	0	0	0	0	0	0	0	0	0	0	0	0	0	0	0	0	0	0	0	0	0	0	0	0	0	0	0	0	0	0	0	0	0	0	0	0	0	0	0	0
sp|P68371|TBB4B_HUMAN	sp|P68371|TBB4B_HUMAN				194330000	192480000	255620000	226480000	360030000	175000000	225700000	168390000	266800000	177590000	476280000	205330000	542530000	518860000	271990000	278160000	245480000	261310000	259440000	315780000	310020000	145370000	194850000	338680000	192300000	327740000	254260000	0	173220000	9568900	2238300	191560000	400280000	313880000	176910000	210730000	425900000	158700000	382570000	404870000	341410000	290960000	113460000	232030000	348830000
sp|P68431|H31_HUMAN;sp|Q71DI3|H32_HUMAN;sp|Q16695|H31T_HUMAN;sp|P84243|H33_HUMAN;sp|Q6NXT2|H3C_HUMAN	sp|P68431|H31_HUMAN;sp|Q71DI3|H32_HUMAN;sp|Q16695|H31T_HUMAN;sp|P84243|H33_HUMAN;sp|Q6NXT2|H3C_HUMAN				18831000	28411000	0	13715000	0	3878600	3672700	0	0	10429000	6654000	1761600	7587500	10536000	0	0	8576800	0	5113300	7456600	12303000	0	11842000	13198000	4821800	124370000	0	0	0	0	0	3502900	24502000	0	4105900	15222000	0	6270900	16355000	5187700	0	0	0	0	31112000
sp|P68543|UBX2A_HUMAN	sp|P68543|UBX2A_HUMAN				0	0	0	0	0	0	0	0	0	0	0	0	0	0	0	0	0	0	0	0	0	0	0	0	0	0	0	0	0	0	0	0	0	0	0	0	0	0	0	0	0	0	0	0	0
sp|P68871|HBB_HUMAN;sp|P02042|HBD_HUMAN;CON__Q3SX09;CON__P02070;sp|P69892|HBG2_HUMAN;sp|P69891|HBG1_HUMAN;sp|P02100|HBE_HUMAN	sp|P68871|HBB_HUMAN;sp|P02042|HBD_HUMAN;CON__Q3SX09			+	0	0	0	6630200	0	0	0	0	0	0	0	0	0	0	0	0	0	0	0	0	0	0	0	0	0	0	0	0	0	0	0	0	0	0	0	0	0	0	0	0	0	0	0	0	0
sp|Q15155|NOMO1_HUMAN;sp|P69849|NOMO3_HUMAN;sp|Q5JPE7|NOMO2_HUMAN	sp|Q15155|NOMO1_HUMAN;sp|P69849|NOMO3_HUMAN;sp|Q5JPE7|NOMO2_HUMAN				0	0	0	0	0	0	0	0	0	0	0	0	0	0	0	0	0	0	0	0	0	0	0	0	0	0	0	0	0	0	0	0	0	0	0	0	0	0	0	0	0	0	0	0	0
sp|P69905|HBA_HUMAN	sp|P69905|HBA_HUMAN				0	0	0	0	0	0	0	0	0	0	0	0	0	0	0	0	0	0	0	0	0	0	0	0	0	0	0	0	0	0	0	0	0	0	0	0	0	0	0	0	0	0	0	0	0
sp|P78310|CXAR_HUMAN	sp|P78310|CXAR_HUMAN				8432200	9045900	0	0	0	1578600	0	0	8765500	0	0	7763100	0	0	21628000	0	15778000	0	11712000	5726800	0	0	0	0	0	0	0	0	0	3807700	0	0	0	0	11398000	0	0	0	0	0	0	0	0	0	0
sp|P78312|F193A_HUMAN	sp|P78312|F193A_HUMAN				0	0	0	0	0	0	0	0	6584800	0	0	0	0	0	0	0	0	0	0	0	0	0	0	0	0	0	0	0	0	0	0	0	0	0	0	0	0	0	0	0	0	0	0	0	0
sp|P78318|IGBP1_HUMAN	sp|P78318|IGBP1_HUMAN				0	0	0	0	0	3615900	0	5410000	1436100	0	2803200	0	0	1793200	0	0	0	0	0	0	0	773850	2641400	0	881600	0	536830	0	0	0	0	0	0	0	0	0	0	0	0	0	0	6080000	1310900	0	0
sp|P78344|IF4G2_HUMAN	sp|P78344|IF4G2_HUMAN				0	0	62900000	68780000	37167000	41198000	57520000	86846000	0	2032900	0	4311700	3754300	3113100	85826000	59403000	62535000	33898000	6988200	51455000	42337000	41003000	59187000	8141100	810070	7171800	0	0	54385000	25925000	0	25181000	0	0	36703000	0	0	0	16557000	7528000	71194000	16559000	4549300	84123000	0
sp|P78347|GTF2I_HUMAN	sp|P78347|GTF2I_HUMAN				0	0	0	0	0	5017300	5482500	2340200	0	0	0	0	0	0	0	0	0	0	0	1829900	0	0	1295700	0	0	0	0	0	0	0	0	0	0	0	0	0	0	0	0	0	0	0	0	0	0
sp|P78356|PI42B_HUMAN	sp|P78356|PI42B_HUMAN				5749100	0	0	0	0	0	0	0	0	0	0	0	0	0	0	0	0	0	0	0	0	0	0	0	0	0	0	0	0	0	0	0	0	0	0	4892100	0	0	0	0	0	0	0	0	0
sp|P78371|TCPB_HUMAN	sp|P78371|TCPB_HUMAN				8146300	0	0	0	0	0	0	0	0	0	0	0	0	0	14503000	0	32063000	0	10381000	8633900	0	0	0	3161100	0	0	0	0	0	0	0	0	0	0	0	0	0	0	0	0	0	0	0	0	0
sp|P78381|S35A2_HUMAN	sp|P78381|S35A2_HUMAN				0	0	0	0	0	0	0	0	0	0	0	0	0	0	0	0	0	0	0	0	5267500	0	0	0	0	0	0	0	0	0	0	0	0	0	0	0	0	0	0	0	0	0	0	0	0
sp|P78423|X3CL1_HUMAN	sp|P78423|X3CL1_HUMAN				0	0	0	0	0	0	0	0	0	0	0	0	0	0	0	0	0	0	0	0	0	0	0	0	0	0	0	0	0	0	0	0	0	0	0	0	0	0	0	0	0	0	0	0	0
sp|P78527|PRKDC_HUMAN	sp|P78527|PRKDC_HUMAN				874000000	0	701670000	588010000	568640000	377910000	127430000	284480000	152020000	636430000	376120000	34586000	874770000	798710000	283330000	339340000	259930000	576640000	315680000	292110000	267980000	81748000	150400000	468650000	417340000	429080000	1245200000	0	352250000	166690000	0	640760000	359450000	397170000	218110000	469800000	129600000	37453000	245240000	375850000	573530000	314680000	216110000	1195400000	1263700000
sp|P78536|ADA17_HUMAN	sp|P78536|ADA17_HUMAN				0	0	0	0	0	0	0	0	0	0	0	0	0	0	0	0	0	0	0	0	0	0	0	0	0	0	0	0	0	0	0	0	0	0	0	0	0	0	0	0	0	0	0	0	0
sp|P78559|MAP1A_HUMAN	sp|P78559|MAP1A_HUMAN				0	0	0	0	0	0	0	0	0	0	0	0	0	0	0	0	0	0	0	0	0	0	0	0	0	0	0	0	0	0	0	0	0	0	0	0	0	0	0	0	0	0	0	0	0
sp|P81605|DCD_HUMAN	sp|P81605|DCD_HUMAN				66370000	0	15529000	10540000	9815500	12179000	0	5048100	0	8051000	56511000	0	8801300	16918000	80575000	0	18625000	19112000	0	12454000	30486000	5086000	25148000	14310000	10151000	28476000	19533000	0	6510900	8220200	0	12482000	0	0	4292800	0	11388000	3633100	0	14570000	17365000	10683000	13024000	16889000	0
sp|P82094|TMF1_HUMAN	sp|P82094|TMF1_HUMAN				779210	0	5392300	1345900	57465000	4407000	2951300	85145000	0	2254500	0	0	6984200	2165100	37600000	30075000	10102000	4165300	16684000	2440900	193010000	161590000	121330000	9450300	1105500	16114000	19526000	3944900	39610000	7659100	0	24020000	88713000	0	22296000	0	0	0	1928600000	727480000	763960000	69336000	997220	306140	0
sp|P82914|RT15_HUMAN	sp|P82914|RT15_HUMAN				0	0	0	0	0	0	0	0	0	0	0	0	0	0	0	0	0	0	0	0	0	0	0	0	0	0	0	0	0	0	0	0	0	0	0	0	0	0	0	0	0	0	0	0	0
sp|P83731|RL24_HUMAN	sp|P83731|RL24_HUMAN				574950000	415320000	996530000	1114100000	2082900000	660350000	633190000	938050000	971460000	3533900000	3685200000	1621900000	3318200000	3944500000	569190000	543050000	294990000	563830000	881390000	310840000	671630000	808630000	992160000	883610000	1139900000	1590800000	373480000	1494000000	610650000	1173500000	1394200000	761000000	782120000	849820000	2594400000	1449900000	1245500000	3539600000	1103100000	4394800000	434810000	1208800000	3978500000	357550000	1013700000
sp|P83881|RL36A_HUMAN	sp|P83881|RL36A_HUMAN				1206800000	2137800000	6242900000	5633100000	11793000000	4518000000	2174100000	7884700000	4385500000	2305000000	2292200000	4314000000	1838600000	2020600000	1464800000	921700000	2510200000	1348700000	3057200000	1880500000	2989400000	2819500000	1449400000	3361600000	4049700000	3773500000	1913500000	7239700000	2413800000	2891100000	6256600000	3231100000	5045900000	3497700000	2972100000	5736800000	6764800000	3473400000	3656400000	1864000000	1771100000	1315900000	4876100000	1482900000	4408100000
sp|P84022|SMAD3_HUMAN;sp|Q15796|SMAD2_HUMAN;sp|O15198|SMAD9_HUMAN;sp|Q99717|SMAD5_HUMAN;sp|Q15797|SMAD1_HUMAN	sp|P84022|SMAD3_HUMAN;sp|Q15796|SMAD2_HUMAN;sp|O15198|SMAD9_HUMAN				0	0	0	0	0	0	0	0	0	0	0	0	4390700	0	0	0	0	0	0	0	0	0	0	0	0	0	0	0	0	0	0	0	0	0	0	0	0	0	0	0	0	4573000	0	0	0
sp|P84085|ARF5_HUMAN	sp|P84085|ARF5_HUMAN				0	0	0	0	0	2143100	622070	3592700	2824000	0	0	0	0	0	0	0	2560800	0	3221100	0	0	0	7644300	0	0	0	0	0	0	0	0	0	0	0	0	0	0	0	0	0	3451800	0	0	0	0
sp|P84098|RL19_HUMAN	sp|P84098|RL19_HUMAN				1638900000	985820000	1271300000	411930000	1859700000	522650000	380100000	1230300000	657890000	1456300000	665060000	909960000	2032900000	1293600000	493210000	904790000	226860000	1128900000	638300000	633940000	591410000	812600000	550870000	803560000	1551900000	1118900000	299930000	804990000	458690000	642500000	919560000	345590000	728240000	1274800000	845860000	2026900000	1249300000	1928700000	869980000	2408400000	488010000	731670000	3697300000	591630000	1515400000
sp|P84103|SRSF3_HUMAN	sp|P84103|SRSF3_HUMAN				0	0	0	0	0	0	0	0	0	0	0	0	0	0	0	0	0	0	0	0	0	0	0	0	0	0	0	0	0	0	0	0	0	0	0	0	0	0	0	0	0	0	0	0	0
sp|P84157|MXRA7_HUMAN	sp|P84157|MXRA7_HUMAN				0	0	0	0	0	0	0	5368000	0	0	8424000	0	4801000	5997900	3949600	0	0	0	9172400	0	6878000	0	0	0	0	0	0	0	0	0	0	0	0	12350000	0	0	0	0	0	0	0	10215000	5105900	0	0
sp|P85037|FOXK1_HUMAN	sp|P85037|FOXK1_HUMAN				0	0	0	0	0	0	0	250810	0	0	0	0	0	0	0	0	0	0	0	0	0	0	0	0	0	0	0	0	0	0	0	0	0	0	0	0	0	0	0	0	0	0	0	0	0
sp|P98088|MUC5A_HUMAN	sp|P98088|MUC5A_HUMAN				0	0	0	0	0	0	0	0	0	0	0	0	0	0	0	0	0	0	0	0	0	0	0	0	0	45655000	0	0	0	0	0	0	0	0	0	0	0	0	0	0	0	0	0	0	0
sp|P98164|LRP2_HUMAN	sp|P98164|LRP2_HUMAN				0	0	0	0	0	0	0	0	0	0	0	0	0	0	0	0	1677500	0	0	0	0	0	0	0	0	0	0	0	5692500	0	0	0	0	0	0	0	0	0	0	0	0	0	0	0	0
sp|P98170|XIAP_HUMAN	sp|P98170|XIAP_HUMAN				0	0	0	0	0	0	0	0	0	0	2416200	0	3025700	2901400	2352700	0	0	0	0	0	0	0	688320	317760	0	0	2256400	1180900	1910200	0	0	0	0	0	905970	0	0	0	2342500	2575200	6747400	0	1235000	0	0
sp|P98172|EFNB1_HUMAN	sp|P98172|EFNB1_HUMAN				0	0	0	0	0	0	0	0	0	0	0	0	0	0	0	0	3229200	0	0	2288800	0	0	0	0	0	0	0	0	0	0	0	0	0	0	0	0	0	0	0	0	996730	0	0	1502900	0
sp|P98174|FGD1_HUMAN	sp|P98174|FGD1_HUMAN				0	0	0	0	0	0	0	0	0	0	0	0	0	0	1374200	0	0	0	1800500	0	709430	0	826820	923060	0	0	0	0	1301100	0	0	0	0	0	0	0	0	0	0	0	0	0	0	0	0
sp|P98175|RBM10_HUMAN;sp|P52756|RBM5_HUMAN;sp|P78332|RBM6_HUMAN	sp|P98175|RBM10_HUMAN				0	0	0	0	0	0	0	0	0	0	0	0	0	0	0	0	0	0	0	0	0	0	0	0	0	0	0	0	0	0	0	0	0	0	0	0	0	0	0	0	0	0	0	0	0
sp|P98194|AT2C1_HUMAN	sp|P98194|AT2C1_HUMAN				0	0	0	0	0	0	0	0	0	0	0	0	0	0	0	0	0	0	0	0	0	0	0	0	0	0	0	0	0	0	0	0	0	0	0	0	0	0	0	0	0	0	0	0	0
sp|P99999|CYC_HUMAN;CON__P62894	sp|P99999|CYC_HUMAN				0	0	0	0	0	0	0	0	0	0	0	0	0	0	0	0	1012800	0	0	0	0	0	0	0	0	0	0	0	0	0	0	0	0	0	0	0	0	0	0	0	0	0	0	0	0
sp|Q00013|EM55_HUMAN	sp|Q00013|EM55_HUMAN				0	0	0	0	0	0	0	0	0	0	0	0	0	0	0	0	0	0	0	0	0	0	0	0	0	0	0	0	0	0	0	0	0	0	0	0	0	0	0	0	0	0	0	0	0
sp|Q00059|TFAM_HUMAN	sp|Q00059|TFAM_HUMAN				6836700	0	0	0	0	0	0	0	0	0	0	0	0	0	0	0	0	0	0	0	0	0	0	0	0	0	0	0	0	0	0	0	0	0	0	0	0	0	0	0	0	0	0	0	0
sp|Q00325|MPCP_HUMAN	sp|Q00325|MPCP_HUMAN				228330000	328390000	54978000	107570000	111920000	100110000	149960000	84727000	49172000	126020000	32473000	47095000	42254000	0	34893000	152800000	53020000	147830000	44814000	80109000	162730000	18297000	134460000	150890000	29127000	137420000	79895000	15414000	124600000	4849200	31675000	132560000	79076000	167160000	53018000	184080000	67130000	30933000	87486000	91301000	94614000	164150000	58785000	58398000	319830000
sp|Q00341|VIGLN_HUMAN	sp|Q00341|VIGLN_HUMAN				33380000	0	96172000	96630000	363020000	278770000	176370000	460190000	100170000	27725000	86505000	88538000	115480000	19826000	209180000	107310000	271910000	199060000	334020000	460470000	790500000	437940000	525310000	595890000	246800000	330270000	133970000	113910000	221910000	152040000	84014000	208720000	88135000	65543000	245330000	20822000	0	4389600	27771000	72213000	239490000	80876000	59991000	245330000	0
sp|Q00526|CDK3_HUMAN;sp|P24941|CDK2_HUMAN	sp|Q00526|CDK3_HUMAN;sp|P24941|CDK2_HUMAN				0	0	0	0	0	0	0	0	0	0	0	0	0	0	0	0	0	0	0	0	0	0	0	0	0	0	0	0	0	0	0	0	0	0	0	0	0	0	0	0	0	0	0	0	0
sp|Q00535|CDK5_HUMAN	sp|Q00535|CDK5_HUMAN				0	0	0	0	715520	719720	0	0	0	0	0	0	0	0	0	0	0	0	0	0	0	0	0	165000	0	0	0	0	0	0	0	0	0	0	0	1756300	0	0	0	0	0	0	0	0	0
sp|Q00587|BORG5_HUMAN	sp|Q00587|BORG5_HUMAN				0	0	339840000	361330000	16635000	0	0	0	0	4711300	14465000	0	0	0	0	0	0	0	0	0	0	0	0	0	0	0	0	0	0	0	0	0	0	0	0	0	0	0	0	0	0	0	0	0	0
sp|Q00610|CLH1_HUMAN;sp|P53675|CLH2_HUMAN	sp|Q00610|CLH1_HUMAN				0	0	0	0	0	0	0	0	0	0	0	0	0	0	0	0	9528200	0	0	1146500	0	1508700	0	0	71950000	0	0	0	0	0	0	0	0	0	0	0	0	0	0	0	0	0	0	0	0
sp|Q00653|NFKB2_HUMAN	sp|Q00653|NFKB2_HUMAN				0	0	0	0	0	0	0	0	0	0	0	0	0	0	0	0	0	0	0	0	1224400	0	0	799060	0	0	0	0	0	0	0	0	0	0	0	0	0	0	0	0	0	0	0	0	0
sp|Q00688|FKBP3_HUMAN	sp|Q00688|FKBP3_HUMAN				0	0	0	0	0	0	0	0	0	0	0	0	0	0	0	0	0	0	0	0	0	0	0	1823700	0	0	0	0	0	0	0	0	0	0	3708500	0	0	0	0	2634300	0	0	2977300	0	0
sp|Q00765|REEP5_HUMAN	sp|Q00765|REEP5_HUMAN				6854400	0	0	0	0	0	0	0	0	0	0	0	0	0	0	0	2405100	0	0	0	0	0	0	0	0	0	0	0	0	0	0	0	0	0	0	0	0	0	0	0	0	0	0	0	0
sp|Q00839|HNRPU_HUMAN	sp|Q00839|HNRPU_HUMAN				0	0	0	6403400	18787000	0	9520300	4943300	0	0	0	0	0	11474000	4728400	7246200	104900000	0	5076000	42056000	6058300	5452300	7567900	36568000	6472100	0	0	0	18234000	0	0	9202600	6517800	0	0	0	0	3558400	0	0	4471400	0	0	0	0
sp|Q01082|SPTB2_HUMAN;sp|Q9H254|SPTN4_HUMAN	sp|Q01082|SPTB2_HUMAN				0	0	0	0	0	0	0	0	0	0	0	0	0	0	4664800	0	2621400	0	0	4637300	0	0	0	0	0	0	0	0	2958000	0	0	0	0	0	0	0	0	0	0	0	0	0	0	0	0
sp|Q01105|SET_HUMAN	sp|Q01105|SET_HUMAN				0	0	0	0	0	0	0	0	0	0	0	0	0	0	0	0	0	0	0	0	0	0	0	0	0	0	0	0	0	0	0	0	0	0	0	0	0	0	0	0	0	0	0	0	0
sp|Q01167|FOXK2_HUMAN	sp|Q01167|FOXK2_HUMAN				0	0	0	0	0	0	0	0	0	0	0	0	0	0	0	0	0	0	0	0	0	0	0	0	0	0	0	0	0	0	0	0	0	0	0	0	0	0	0	0	0	0	0	0	0
sp|Q01469|FABP5_HUMAN	sp|Q01469|FABP5_HUMAN				0	0	0	0	0	0	0	0	0	0	0	0	0	0	0	0	0	0	0	0	0	0	0	0	0	0	0	0	0	0	0	0	0	0	0	0	0	0	0	0	2833800	0	0	0	0
sp|Q01484|ANK2_HUMAN	sp|Q01484|ANK2_HUMAN				0	0	0	0	0	0	0	0	0	0	0	0	0	0	0	0	0	0	0	0	0	0	0	0	0	0	0	0	0	0	0	0	0	0	0	0	0	0	0	0	0	0	0	0	0
sp|Q01524|DEF6_HUMAN	sp|Q01524|DEF6_HUMAN	+			0	0	0	0	0	0	0	0	0	0	0	0	0	0	0	0	0	0	0	0	0	0	0	0	0	0	0	0	0	0	0	0	0	0	0	0	0	0	0	0	0	0	0	0	0
sp|Q01546|K22O_HUMAN	sp|Q01546|K22O_HUMAN				0	0	0	0	0	0	0	0	0	0	0	0	0	0	0	0	0	0	0	0	0	0	0	0	0	0	0	0	0	0	0	0	0	0	0	0	0	0	0	0	0	0	0	0	0
sp|Q01650|LAT1_HUMAN;sp|Q9UM01|YLAT1_HUMAN	sp|Q01650|LAT1_HUMAN				245680000	506290000	92447000	83608000	103500000	35742000	57872000	130790000	33318000	23757000	14215000	10413000	37134000	49679000	99811000	232930000	117930000	161230000	68279000	88828000	61038000	10658000	33091000	75608000	8641700	29201000	6957700	59475000	130090000	41092000	97604000	145620000	11250000	0	0	0	0	0	0	0	21208000	8927200	4331800	35039000	0
sp|Q01780|EXOSX_HUMAN	sp|Q01780|EXOSX_HUMAN				0	0	0	0	0	0	0	0	0	0	0	0	0	0	0	0	0	0	0	0	0	0	0	0	0	0	0	0	0	0	0	0	0	0	0	0	0	0	0	0	0	0	0	0	0
sp|Q01813|PFKAP_HUMAN	sp|Q01813|PFKAP_HUMAN				0	0	0	0	0	0	0	0	0	0	0	0	0	0	0	0	0	0	0	0	0	0	0	0	0	0	0	0	0	0	0	0	5085600	0	0	5028600	0	0	0	0	0	0	0	0	8217600
sp|Q01831|XPC_HUMAN	sp|Q01831|XPC_HUMAN				0	0	0	0	0	0	0	0	0	0	0	0	0	0	0	0	0	0	0	0	0	0	0	1566300	0	0	0	0	0	0	0	0	0	0	0	0	0	0	0	0	0	0	0	0	0
sp|Q01968|OCRL_HUMAN	sp|Q01968|OCRL_HUMAN				0	0	0	4356300	1898100	0	4365400	27490000	0	2318500	0	0	0	0	6566700	9198400	22799000	8736200	0	9844900	621570000	393800000	661850000	2845100	0	1929300	10917000	0	52942000	14842000	0	36171000	4922200	0	36435000	0	0	0	48065000	33306000	246390000	0	0	25871000	15900000
sp|Q01974|ROR2_HUMAN	sp|Q01974|ROR2_HUMAN				0	0	0	0	0	1242300	0	0	0	0	0	3575500	0	0	0	0	0	0	0	0	0	0	0	0	0	0	0	0	0	0	0	1282900	0	0	0	0	0	0	0	0	0	0	0	0	0
sp|Q02040|AK17A_HUMAN	sp|Q02040|AK17A_HUMAN				6361900	25882000	40608000	118850000	42898000	4512600	31531000	4006000	0	95029000	4120400	0	97481000	93528000	18501000	108600000	8685800	135530000	0	12777000	20782000	0	0	18900000	544570	22517000	8189900	9198300	26646000	1221200	12976000	28261000	54374000	3905000	29581000	63943000	9925200	138790000	0	14218000	4453100	0	32033000	30067000	21257000
sp|Q02156|KPCE_HUMAN	sp|Q02156|KPCE_HUMAN				0	0	0	0	0	0	0	0	0	0	0	0	0	0	0	0	0	0	0	0	0	0	0	0	0	0	0	0	566420	0	0	0	0	0	0	0	0	0	0	0	0	0	0	0	0
sp|Q02224|CENPE_HUMAN	sp|Q02224|CENPE_HUMAN				0	0	0	0	0	0	0	0	0	0	0	0	0	0	6102900	0	0	0	0	10878000	3482500	0	12986000	0	0	2145500	0	0	5914600	0	0	0	0	0	0	0	0	0	3815300	0	40552000	0	10249000	0	0
sp|Q02241|KIF23_HUMAN	sp|Q02241|KIF23_HUMAN				0	0	0	0	0	0	0	1202700	0	0	0	0	0	0	0	0	0	0	0	0	0	0	0	0	0	0	0	0	0	0	0	0	0	0	0	0	0	0	0	0	0	0	0	0	0
sp|Q02297|NRG1_HUMAN	sp|Q02297|NRG1_HUMAN				0	0	0	0	0	0	0	0	0	0	0	0	0	0	0	0	0	0	0	0	0	0	0	0	0	0	0	0	0	0	0	0	5662700	0	0	0	0	0	0	0	0	0	0	0	0
sp|Q02388|CO7A1_HUMAN	sp|Q02388|CO7A1_HUMAN	+			0	0	0	0	0	0	0	0	0	0	0	0	0	0	0	0	0	0	0	26545000	0	0	0	0	0	0	0	0	0	0	0	0	0	0	0	0	0	0	0	0	0	0	0	0	0
sp|Q02413|DSG1_HUMAN	sp|Q02413|DSG1_HUMAN				0	0	0	0	0	0	0	0	0	0	0	0	0	0	0	0	0	0	0	0	2106600	0	0	1153200	0	0	0	0	0	0	0	0	0	0	0	0	0	0	0	0	0	0	0	0	0
sp|Q02487|DSC2_HUMAN	sp|Q02487|DSC2_HUMAN				0	0	0	0	0	0	2266500	3943900	0	0	0	0	0	0	0	0	3151300	3887900	4376500	3662300	0	0	0	0	0	0	0	0	3771900	3119200	0	5662400	0	0	5227600	0	0	0	0	0	616330	998480	0	424780	0
sp|Q02543|RL18A_HUMAN	sp|Q02543|RL18A_HUMAN				0	0	0	0	0	0	0	0	2363100	5342900	5922500	0	0	0	0	0	3189400	0	0	0	0	0	0	0	0	0	0	0	0	0	0	0	0	0	0	0	0	0	0	0	0	0	0	0	0
sp|Q02790|FKBP4_HUMAN	sp|Q02790|FKBP4_HUMAN				0	1675700	0	815430	1735300	571760	0	0	0	0	0	0	0	0	0	0	818500	0	0	0	4591300	0	3437300	26975000	21563000	12656000	0	0	1444500	0	0	0	0	0	0	4706700	0	9944900	0	0	3024100	0	0	2590200	0
sp|Q02878|RL6_HUMAN	sp|Q02878|RL6_HUMAN				6440400	29987000	0	0	10421000	0	3619800	0	12700000	5306000	5826400	0	8051300	20702000	2204000	0	0	0	1953500	5728500	324530	0	0	0	57275000	1594500	0	0	0	0	0	0	8786900	0	7384000	0	0	38955000	7254800	35689000	0	23435000	17431000	0	0
sp|Q02880|TOP2B_HUMAN	sp|Q02880|TOP2B_HUMAN				0	0	0	0	0	0	0	0	0	0	0	0	0	0	0	0	0	0	0	0	0	0	0	0	0	0	0	0	0	0	0	0	0	0	0	0	0	0	0	0	0	0	0	0	0
sp|Q02952|AKA12_HUMAN	sp|Q02952|AKA12_HUMAN				0	42740000	64915000	62331000	54626000	106120000	98905000	115990000	39998000	41808000	79465000	8457100	117540000	140700000	151910000	413570000	250810000	252920000	132810000	232560000	57001000	20010000	54336000	275450000	49834000	71368000	50865000	0	43421000	83397000	0	74988000	97602000	82980000	141210000	87178000	44187000	0	234230000	29528000	0	397760000	7161500	12781000	9381500
sp|Q02978|M2OM_HUMAN	sp|Q02978|M2OM_HUMAN				6018700	4522300	0	0	0	0	0	0	0	0	0	0	0	0	0	0	0	0	0	0	0	0	0	0	0	0	0	0	0	0	0	0	3485300	0	0	0	0	0	0	0	0	0	0	0	10703000
sp|Q03001|DYST_HUMAN;sp|Q15853|USF2_HUMAN;REV__sp|Q9BX97|PLVAP_HUMAN	sp|Q03001|DYST_HUMAN				0	0	53772000	88755000	66611000	116570000	217010000	91868000	0	0	0	0	0	15088000	82405000	68857000	79484000	53287000	58786000	157300000	9995400	6297300	62115000	15439000	20639000	4998700	52310000	18751000	208220000	210230000	41561000	259360000	0	0	14067000	0	0	12792000	2649800	16919000	122200000	17939000	45641000	155800000	0
sp|Q03013|GSTM4_HUMAN	sp|Q03013|GSTM4_HUMAN	+			0	0	0	0	0	0	0	0	0	0	0	0	0	0	0	0	0	0	0	0	0	0	0	0	0	0	0	0	0	0	0	0	0	0	0	0	0	0	0	0	0	0	0	0	0
sp|Q03164|KMT2A_HUMAN	sp|Q03164|KMT2A_HUMAN				0	0	0	0	0	0	0	0	0	0	0	0	0	0	0	0	0	0	0	0	0	0	0	0	0	0	0	0	0	0	0	0	0	0	0	0	0	0	0	0	0	0	0	0	0
sp|Q03468|ERCC6_HUMAN	sp|Q03468|ERCC6_HUMAN				0	0	0	0	0	0	0	0	0	0	0	0	0	0	0	0	0	0	0	0	0	0	0	0	0	0	0	0	0	0	0	0	0	0	0	0	0	0	0	0	0	0	0	0	0
sp|Q03701|CEBPZ_HUMAN	sp|Q03701|CEBPZ_HUMAN				0	0	0	0	0	0	0	0	0	0	0	0	0	0	0	1123700	0	965530	0	0	0	0	0	0	0	0	0	0	0	0	0	0	0	0	0	0	0	0	0	0	0	0	0	0	0
sp|Q04637|IF4G1_HUMAN;REV__sp|Q8NEG2|CG057_HUMAN	sp|Q04637|IF4G1_HUMAN				47007000	5805500	208240000	189580000	210270000	598250000	441430000	466590000	228030000	41356000	71093000	194890000	84578000	69374000	362360000	246750000	514910000	166320000	471300000	326740000	722070000	377560000	371750000	640930000	484870000	513180000	8706100	18909000	295270000	104710000	142710000	181480000	113530000	13237000	58623000	47875000	5401900	16984000	48088000	5109400	142380000	185620000	116460000	350740000	0
sp|Q04656|ATP7A_HUMAN	sp|Q04656|ATP7A_HUMAN				0	0	0	0	0	0	0	1798400	0	0	0	0	0	0	0	0	0	0	0	0	0	0	0	0	0	0	0	0	0	0	0	4026100	0	0	0	0	0	0	0	0	0	0	0	0	0
sp|Q04721|NOTC2_HUMAN;sp|Q7Z3S9|NT2NL_HUMAN	sp|Q04721|NOTC2_HUMAN				0	0	0	4133900	0	0	6081100	9260400	0	0	0	0	0	0	2783800	10700000	22490000	5520800	11389000	11078000	4024000	0	6152200	1760900	0	0	7734700	0	15566000	5962300	0	1183800	0	0	0	0	0	0	0	0	0	0	0	4939100	0
sp|Q04726|TLE3_HUMAN;sp|Q04725|TLE2_HUMAN;sp|Q04724|TLE1_HUMAN;sp|Q04727|TLE4_HUMAN	sp|Q04726|TLE3_HUMAN;sp|Q04725|TLE2_HUMAN;sp|Q04724|TLE1_HUMAN;sp|Q04727|TLE4_HUMAN				0	0	0	0	0	0	0	0	0	0	0	0	0	0	0	0	0	0	0	0	0	0	0	0	0	0	0	0	0	0	0	0	0	0	0	0	0	0	0	0	0	0	0	0	0
sp|Q04760|LGUL_HUMAN	sp|Q04760|LGUL_HUMAN				0	0	0	0	0	0	0	0	0	0	0	0	0	0	0	0	0	0	0	0	0	0	0	0	0	0	0	0	0	0	0	0	0	0	0	0	0	0	0	0	0	0	0	0	0
sp|Q04837|SSBP_HUMAN	sp|Q04837|SSBP_HUMAN				0	0	0	0	0	0	0	0	3606200	3555600	0	0	0	0	0	0	4334700	0	0	0	0	0	11410000	15316000	20723000	62631000	0	0	0	0	0	0	0	0	0	0	0	0	0	0	0	0	0	0	0
sp|Q04917|1433F_HUMAN	sp|Q04917|1433F_HUMAN	+			0	0	0	0	0	0	0	0	0	0	0	0	0	0	0	0	0	0	0	0	0	0	0	0	0	0	0	0	0	0	0	0	0	0	0	0	0	0	0	0	0	0	0	0	0
sp|Q05084|ICA69_HUMAN	sp|Q05084|ICA69_HUMAN				0	0	0	0	0	0	0	0	0	0	0	0	0	0	0	0	0	0	0	0	0	0	0	0	0	0	0	0	0	0	0	0	0	0	0	0	0	0	0	24192000	13653000	0	0	0	0
sp|Q05086|UBE3A_HUMAN	sp|Q05086|UBE3A_HUMAN				0	0	0	0	0	0	0	0	0	0	0	0	0	0	0	0	0	0	0	0	992580	0	0	2001400	0	0	0	0	0	0	0	0	0	0	0	0	0	0	0	0	0	0	0	0	0
sp|Q05397|FAK1_HUMAN	sp|Q05397|FAK1_HUMAN				0	0	0	0	0	4945400	1724900	2018100	0	0	0	0	0	0	0	0	0	0	1535200	2938000	3760300	0	1273300	963860	0	0	0	0	2785600	0	0	2260500	0	0	0	0	0	0	0	0	2773000	0	0	0	0
sp|Q05655|KPCD_HUMAN;sp|Q04759|KPCT_HUMAN	sp|Q05655|KPCD_HUMAN				0	0	1960900	0	0	2740100	4700800	3536900	0	0	0	0	0	0	0	0	0	0	5763500	10768000	0	0	3698300	0	0	0	3483600	0	3094500	7262000	0	0	0	0	0	0	0	0	5267400	0	7264400	5288100	2938100	22301000	0
sp|Q05682|CALD1_HUMAN	sp|Q05682|CALD1_HUMAN				5393000	25300000	61506000	24274000	3060000	39827000	49542000	44146000	7130000	24162000	985140	0	18037000	19304000	125150000	12061000	48653000	21767000	19468000	34484000	0	6063300	4761600	0	1135200	0	19732000	8208900	13610000	25180000	13430000	13644000	4736000	0	24202000	0	0	5454800	4546000	3537300	24357000	5095300	17691000	60823000	0
sp|Q05707|COEA1_HUMAN	sp|Q05707|COEA1_HUMAN	+			0	0	0	0	0	0	0	0	0	0	0	0	0	0	0	0	0	0	0	0	0	0	0	0	0	0	0	0	0	0	0	0	0	0	0	0	0	0	0	0	0	0	0	0	0
sp|Q05823|RN5A_HUMAN	sp|Q05823|RN5A_HUMAN				0	0	2813600	16619000	0	0	4105700	2928200	0	4753500	0	0	0	3689400	536600	4941200	1665400	1593600	0	1564000	0	0	0	427270	1411200	0	0	0	2012900	0	0	3350500	10848000	0	0	0	0	0	2077500	0	0	1920600	2816900	1140100	1462500
sp|Q05DH4|F16A1_HUMAN	sp|Q05DH4|F16A1_HUMAN				0	0	0	0	0	0	0	0	0	0	0	0	0	0	0	0	0	0	0	0	0	0	0	0	0	0	0	0	0	0	0	0	0	0	0	0	0	0	0	0	0	0	0	0	0
sp|Q06124|PTN11_HUMAN	sp|Q06124|PTN11_HUMAN				0	0	0	0	0	0	2671000	0	0	0	0	0	0	0	0	0	0	0	0	0	0	0	0	0	0	0	0	3025000	0	4735100	4993600	0	0	0	0	0	0	0	0	0	0	0	0	0	0
sp|Q06190|P2R3A_HUMAN	sp|Q06190|P2R3A_HUMAN				0	0	0	0	0	0	0	0	0	0	0	0	0	0	0	0	0	0	0	0	0	0	0	0	0	0	0	0	0	0	0	0	0	0	0	0	0	0	0	0	0	0	0	0	0
sp|Q06481|APLP2_HUMAN	sp|Q06481|APLP2_HUMAN				0	0	0	0	0	0	0	0	0	0	0	0	0	0	0	0	0	0	0	0	0	0	0	0	0	0	0	0	0	0	0	0	0	0	13563000	0	0	0	0	0	0	0	0	0	0
sp|Q06546|GABPA_HUMAN	sp|Q06546|GABPA_HUMAN				0	0	0	0	0	0	0	0	0	0	0	0	0	0	0	0	0	0	0	0	0	0	0	0	0	0	0	0	0	0	0	0	0	0	0	0	0	0	0	0	0	0	0	0	0
sp|Q06830|PRDX1_HUMAN	sp|Q06830|PRDX1_HUMAN				155780000	67603000	39044000	58315000	104430000	79950000	54000000	97021000	69081000	55295000	26020000	55090000	69952000	68094000	72919000	38756000	79475000	24409000	57329000	45965000	48566000	31059000	98343000	67398000	29825000	76810000	37894000	52160000	83893000	34827000	29009000	50315000	113110000	89203000	44018000	116170000	38923000	9834300	57979000	38793000	59236000	68576000	42886000	41308000	184850000
sp|Q07020|RL18_HUMAN	sp|Q07020|RL18_HUMAN				7797500	12400000	0	5390400	16828000	9893500	0	0	15644000	32696000	31767000	0	14471000	14322000	0	0	13164000	0	5385400	4101300	0	0	6314700	0	10679000	4314900	0	7100900	0	0	0	2991100	13813000	0	5643800	8229100	0	15228000	9062200	53920000	0	7113600	27235000	0	5167200
sp|Q07021|C1QBP_HUMAN	sp|Q07021|C1QBP_HUMAN				0	0	0	0	843750	0	0	0	0	0	0	0	0	0	0	0	0	0	0	0	0	0	0	2745700	95688000	7156000	0	0	0	0	0	0	0	0	0	0	0	0	0	0	0	0	0	0	0
sp|Q07065|CKAP4_HUMAN;sp|Q96K21|ANCHR_HUMAN	sp|Q07065|CKAP4_HUMAN				725470000	797380000	12298000	245230000	90740000	74835000	209450000	125120000	182370000	530020000	314070000	98313000	718050000	849010000	258030000	218160000	180430000	235760000	258400000	216240000	111830000	0	183000000	266940000	1414100	419920000	198870000	16084000	57251000	42602000	16205000	55998000	915030000	737760000	181620000	1246600000	698020000	430760000	363270000	493960000	29987000	609190000	241910000	75071000	733980000
sp|Q07157|ZO1_HUMAN	sp|Q07157|ZO1_HUMAN				8669600	0	0	0	3426000	0	3773000	0	0	0	0	0	0	0	0	0	5935100	0	0	0	6865600	0	6398400	2739600	0	0	0	0	0	0	0	0	0	0	0	0	0	0	0	0	0	0	0	0	0
sp|Q07617|SPAG1_HUMAN	sp|Q07617|SPAG1_HUMAN				0	0	0	0	0	0	0	0	0	0	0	0	0	0	0	0	0	0	0	0	0	0	0	0	0	820270	0	0	0	0	0	0	0	0	0	0	0	0	0	0	0	0	0	0	0
sp|Q07627|KRA11_HUMAN;sp|P0C5Y4|KRA14_HUMAN;sp|Q8IUG1|KRA13_HUMAN	sp|Q07627|KRA11_HUMAN;sp|P0C5Y4|KRA14_HUMAN;sp|Q8IUG1|KRA13_HUMAN				0	0	0	0	0	0	0	0	0	0	0	0	0	0	0	0	0	0	0	0	0	0	0	0	0	0	0	0	0	0	0	0	0	0	0	0	0	0	0	0	0	0	0	0	0
sp|Q07666|KHDR1_HUMAN	sp|Q07666|KHDR1_HUMAN				0	0	0	0	0	0	0	0	0	0	0	0	0	0	0	0	0	0	0	0	0	0	0	0	0	0	0	0	0	0	0	0	0	0	0	0	0	0	0	0	0	0	0	0	0
sp|Q07812|BAX_HUMAN	sp|Q07812|BAX_HUMAN				42358000	51846000	47198000	57378000	75750000	55682000	63728000	146890000	66326000	165740000	223760000	50710000	145410000	195090000	79541000	72919000	70002000	68758000	68649000	56976000	74392000	119470000	109020000	36259000	48050000	53094000	29259000	94431000	54765000	77952000	86365000	110000000	15161000	5228300	107040000	0	0	0	3121500	76172000	50675000	0	114420000	24472000	0
sp|Q07820|MCL1_HUMAN	sp|Q07820|MCL1_HUMAN				6047600	0	0	6359600	2785300	20381000	19124000	9172500	0	0	0	31959000	7709500	2163800	12681000	0	20524000	0	10042000	11562000	0	10227000	15203000	496970	0	6510400	10269000	15636000	8406900	8821000	9778100	12875000	0	0	7934600	3909200	0	0	12178000	0	23179000	20594000	0	9953800	0
sp|Q07864|DPOE1_HUMAN	sp|Q07864|DPOE1_HUMAN				0	0	0	0	0	0	0	0	0	0	0	0	0	0	0	0	0	0	0	0	0	0	0	0	0	0	0	0	651520	0	0	0	0	0	0	0	0	0	0	0	0	0	0	0	0
sp|Q07866|KLC1_HUMAN;sp|Q9NSK0|KLC4_HUMAN	sp|Q07866|KLC1_HUMAN				0	0	0	0	0	0	0	0	0	0	0	0	0	0	0	0	0	0	0	0	0	0	0	220260	0	0	0	0	0	0	0	0	0	0	0	0	0	0	724280	0	0	0	0	0	0
sp|Q07889|SOS1_HUMAN;sp|Q07890|SOS2_HUMAN	sp|Q07889|SOS1_HUMAN				0	0	0	0	0	0	0	0	0	0	0	0	0	0	0	0	0	0	23216000	74900000	0	0	0	0	0	0	0	0	648100	0	0	0	0	0	0	0	0	0	0	0	0	0	0	3115600	0
sp|Q07912|ACK1_HUMAN	sp|Q07912|ACK1_HUMAN				0	0	34324000	31073000	11899000	0	0	0	0	0	0	0	0	0	0	0	0	0	0	0	0	0	0	0	0	0	0	0	0	0	0	0	0	0	0	0	0	0	0	0	0	0	0	0	0
sp|Q07960|RHG01_HUMAN	sp|Q07960|RHG01_HUMAN				27817000	21243000	67099000	81720000	10167000	909190000	1476900000	753050000	717840000	50919000	325330000	455600000	306210000	158200000	71184000	0	32254000	0	25543000	21648000	9172000	0	7704500	1824100	7282500	1855600	17806000	17397000	37139000	20420000	1680200	3185700	0	0	13957000	0	0	0	19506000	10406000	94507000	1326500	0	36379000	0
sp|Q08050|FOXM1_HUMAN	sp|Q08050|FOXM1_HUMAN				0	0	0	0	0	0	0	0	0	0	0	0	0	0	0	0	0	0	0	0	0	0	0	0	0	0	0	0	0	0	0	0	0	0	0	0	0	0	0	0	0	0	0	0	0
sp|Q08170|SRSF4_HUMAN;sp|Q13243|SRSF5_HUMAN;sp|Q13247|SRSF6_HUMAN	sp|Q08170|SRSF4_HUMAN				0	0	0	0	0	0	0	0	0	5659100	0	0	0	0	0	0	0	0	0	0	0	0	0	0	0	0	0	0	0	0	0	0	0	0	0	0	0	0	0	0	0	0	0	0	0
sp|Q08188|TGM3_HUMAN	sp|Q08188|TGM3_HUMAN				0	0	0	0	0	0	0	0	0	0	0	0	0	0	0	0	0	1177800	0	0	0	0	0	0	0	0	0	0	0	0	0	0	0	0	0	0	0	0	0	0	807650	0	0	0	0
sp|Q08211|DHX9_HUMAN	sp|Q08211|DHX9_HUMAN				0	0	0	0	2757900	0	0	0	0	0	0	0	0	0	0	0	9688200	0	0	0	1880400	0	0	7067700	0	0	0	0	0	0	0	0	0	0	0	0	0	0	0	0	0	0	0	0	0
sp|Q08378|GOGA3_HUMAN	sp|Q08378|GOGA3_HUMAN				7308300	0	0	0	0	0	0	1328700	0	0	0	0	0	0	3190000	16693000	0	22055000	0	0	4845800	23131000	1629400	13435000	0	0	0	0	0	0	0	0	0	0	0	0	0	0	0	10989000	3316900	0	0	2835500	0
sp|Q08379|GOGA2_HUMAN	sp|Q08379|GOGA2_HUMAN				0	0	1166900	3400700	8521900	12075000	0	1484200	0	0	0	2722400	0	0	18398000	8618200	7945800	5493500	1063100	5242300	9328500	19759000	23205000	4730400	12052000	17420000	7652400	0	21049000	0	0	7935800	0	0	0	0	0	0	163220000	128520000	308830000	0	0	3273000	0
sp|Q08554|DSC1_HUMAN	sp|Q08554|DSC1_HUMAN				0	0	0	0	0	0	0	0	0	0	0	0	0	0	0	0	0	0	0	0	0	0	0	0	0	0	0	0	0	0	0	0	0	0	0	0	0	0	0	0	0	0	0	0	0
sp|Q08752|PPID_HUMAN	sp|Q08752|PPID_HUMAN				0	0	0	0	0	0	0	0	0	0	0	0	0	0	0	0	0	0	0	0	0	0	2303900	0	0	0	0	0	0	0	0	0	0	0	0	0	0	0	0	0	0	0	0	0	0
sp|Q08945|SSRP1_HUMAN	sp|Q08945|SSRP1_HUMAN				0	0	2135100	12062000	0	0	0	0	0	0	0	0	0	0	0	6472000	0	3014900	0	1150000	0	0	0	2110400	0	5548000	0	0	1666200	0	0	0	11236000	0	0	2376700	0	0	7301700	0	0	11102000	0	3162700	0
sp|Q08AD1|CAMP2_HUMAN	sp|Q08AD1|CAMP2_HUMAN				0	0	0	0	0	0	2943500	0	0	0	0	0	0	0	0	0	0	0	0	0	0	0	0	0	0	0	0	0	0	0	0	0	0	0	0	0	0	0	0	0	0	0	0	3342500	0
sp|Q08AE8|SPIR1_HUMAN	sp|Q08AE8|SPIR1_HUMAN				0	0	0	0	0	0	0	0	0	0	0	0	0	0	0	0	0	0	0	0	0	0	0	0	0	0	0	0	0	0	0	0	0	0	0	0	0	0	0	0	0	0	0	0	0
sp|Q08J23|NSUN2_HUMAN	sp|Q08J23|NSUN2_HUMAN				0	0	0	0	0	0	0	0	0	0	0	0	0	0	0	0	1195400	0	0	0	822630	0	0	0	0	0	0	0	831030	0	0	0	0	0	0	0	0	0	0	0	0	0	0	0	0
sp|Q09161|NCBP1_HUMAN	sp|Q09161|NCBP1_HUMAN				0	0	0	0	0	0	0	0	0	0	0	0	0	0	0	0	0	0	0	0	0	0	0	0	0	0	0	0	0	0	0	0	0	0	0	0	0	0	0	0	0	0	0	0	0
sp|Q09666|AHNK_HUMAN;sp|P48552|NRIP1_HUMAN	sp|Q09666|AHNK_HUMAN				0	98147000	2037800000	2408100000	1026200000	2992700000	2916300000	1039200000	596080000	556540000	392130000	247200000	1498800000	1154400000	2529600000	1356400000	2434000000	756920000	1917100000	1723700000	2029300000	996220000	350720000	1810800000	963500000	694140000	1094100000	0	2663400000	1314300000	0	2681900000	252130000	253170000	1798000000	993760000	482430000	253110000	597830000	54152000	1130900000	912850000	75999000	2698400000	353080000
sp|Q0IIM8|TBC8B_HUMAN	sp|Q0IIM8|TBC8B_HUMAN				0	0	0	0	0	0	0	0	0	0	0	0	0	0	0	0	0	0	0	0	9142000	6882200	4008700	0	0	0	0	0	0	0	0	0	0	0	3262000	0	0	0	0	0	8287500	0	0	0	0
sp|Q0Z7S8|FABP9_HUMAN	sp|Q0Z7S8|FABP9_HUMAN	+			0	0	0	0	0	0	0	0	0	0	0	0	0	0	0	0	0	0	0	0	0	0	0	0	0	0	0	0	0	0	0	0	0	0	0	0	0	0	0	0	0	0	0	0	0
sp|Q10567|AP1B1_HUMAN	sp|Q10567|AP1B1_HUMAN				0	0	0	0	0	0	0	0	0	0	0	0	0	0	0	0	0	0	0	0	0	0	0	0	0	0	0	0	0	0	0	0	0	0	0	0	0	0	0	0	0	0	0	0	0
sp|Q12756|KIF1A_HUMAN	sp|Q12756|KIF1A_HUMAN	+			0	0	0	0	0	0	0	0	0	0	0	0	0	0	0	0	0	0	0	0	0	0	0	0	0	0	0	0	0	0	0	0	0	0	0	0	0	0	0	0	0	0	0	0	0
sp|Q12769|NU160_HUMAN	sp|Q12769|NU160_HUMAN				0	0	0	0	0	0	0	0	0	0	0	0	0	0	0	0	0	0	0	0	0	0	0	0	0	0	0	0	0	0	0	0	0	0	0	0	0	0	0	0	0	0	0	0	0
sp|Q12789|TF3C1_HUMAN	sp|Q12789|TF3C1_HUMAN				0	0	0	0	0	0	1250900	0	0	0	0	0	0	0	0	0	0	1299200	0	0	2677700	0	606620	18672000	0	1663200	0	0	0	0	0	0	0	0	0	0	0	0	0	0	0	0	0	0	0
sp|Q12797|ASPH_HUMAN	sp|Q12797|ASPH_HUMAN				0	0	0	0	0	1895600	0	0	0	0	0	0	0	0	0	0	0	0	0	0	3739600	0	0	2858600	0	0	0	0	1836700	0	0	5196200	0	0	0	0	0	0	0	0	0	0	0	0	0
sp|Q12800|TFCP2_HUMAN	sp|Q12800|TFCP2_HUMAN				0	0	0	0	0	0	0	0	0	0	0	0	0	0	0	0	0	0	0	0	0	0	1490500	0	0	1312900	0	0	0	0	0	0	0	0	0	0	0	0	0	0	0	0	0	0	0
sp|Q12802|AKP13_HUMAN;REV__sp|Q99543|DNJC2_HUMAN	sp|Q12802|AKP13_HUMAN				0	0	0	0	0	7246700	9565800	1261300	0	0	0	0	0	0	0	0	0	0	0	0	1475200	0	0	3221300	0	0	0	0	0	0	0	0	0	0	0	0	0	0	0	0	1331700	0	0	7491400	0
sp|Q12816|TROP_HUMAN	sp|Q12816|TROP_HUMAN				0	0	0	0	0	0	0	0	0	0	571350	0	0	0	0	0	0	0	0	0	0	0	755870	0	0	0	0	0	0	0	0	0	0	0	0	0	0	0	0	0	0	0	0	0	0
sp|Q12830|BPTF_HUMAN	sp|Q12830|BPTF_HUMAN				1689700	0	15237000	11516000	0	14555000	8464600	4679900	0	0	0	0	0	0	0	0	0	2316800	0	3365300	22843000	0	0	2793100	0	2573900	0	0	5768000	0	0	2135600	0	0	0	0	0	0	0	0	0	0	0	0	0
sp|Q12834|CDC20_HUMAN	sp|Q12834|CDC20_HUMAN				0	0	0	0	0	0	0	0	0	0	0	0	0	0	0	0	0	0	0	0	0	0	0	0	0	0	0	0	0	0	0	0	0	0	0	0	0	0	0	0	0	0	0	0	0
sp|Q12840|KIF5A_HUMAN	sp|Q12840|KIF5A_HUMAN				0	0	0	0	0	0	0	0	0	0	0	0	0	0	0	0	0	0	0	0	0	0	0	0	0	0	0	0	0	0	0	0	0	0	0	0	0	0	0	0	0	0	0	0	0
sp|Q12846|STX4_HUMAN	sp|Q12846|STX4_HUMAN				0	0	0	0	0	0	0	0	0	0	0	0	0	0	0	0	0	0	0	0	0	0	0	0	0	0	0	0	0	0	0	0	0	0	0	0	0	0	0	0	0	0	0	0	0
sp|Q12851|M4K2_HUMAN	sp|Q12851|M4K2_HUMAN				0	0	0	0	0	0	0	0	0	0	0	0	0	0	0	0	0	0	0	0	0	2251700	1719600	0	0	0	0	0	0	0	0	0	0	0	0	0	0	0	0	0	0	0	0	0	0
sp|Q12872|SFSWA_HUMAN	sp|Q12872|SFSWA_HUMAN				0	0	0	4588200	16958000	0	0	1755800	0	0	0	0	0	0	0	2223900	0	3321300	0	0	0	0	0	0	0	0	0	0	0	0	0	0	0	0	0	0	0	9794700	0	0	0	0	0	0	0
sp|Q12873|CHD3_HUMAN	sp|Q12873|CHD3_HUMAN				0	0	0	0	0	0	0	0	0	0	0	0	0	0	0	0	0	0	0	0	0	0	0	0	0	0	0	0	0	0	0	0	0	0	0	0	0	0	0	0	0	0	0	0	0
sp|Q12893|TM115_HUMAN	sp|Q12893|TM115_HUMAN				0	0	0	0	0	0	0	0	0	0	0	0	0	0	0	0	0	0	0	0	0	0	0	0	0	0	0	0	0	0	0	0	0	0	0	0	0	0	0	0	0	0	0	0	0
sp|Q12906|ILF3_HUMAN	sp|Q12906|ILF3_HUMAN				0	0	0	0	0	0	0	0	0	0	0	0	0	0	0	0	0	0	0	0	0	0	0	0	0	0	0	0	0	0	0	0	0	0	0	0	0	0	0	0	0	0	0	0	0
sp|Q12913|PTPRJ_HUMAN	sp|Q12913|PTPRJ_HUMAN				0	0	0	0	0	0	0	0	0	0	0	0	0	0	0	0	0	0	0	0	0	0	0	0	0	0	0	0	0	0	0	0	0	0	0	0	0	0	0	0	0	0	0	0	0
sp|Q12923|PTN13_HUMAN;REV__sp|Q14197|ICT1_HUMAN	sp|Q12923|PTN13_HUMAN				0	0	266390000	417210000	163620000	207780000	369420000	143740000	108440000	580700000	279960000	201080000	548410000	823530000	119990000	196850000	78939000	226640000	107030000	183520000	401750000	6131500	220430000	364180000	30845000	375360000	79862000	0	685630000	0	0	963450000	618900000	303470000	13473000	493670000	416770000	14582000	282150000	264320000	316040000	359050000	24870000	338680000	339550000
sp|Q12931|TRAP1_HUMAN	sp|Q12931|TRAP1_HUMAN				0	11193000	0	0	0	0	0	0	0	0	0	0	0	0	0	0	0	0	0	0	7030200	4052100	0	101270000	233660000	53222000	0	0	0	0	0	0	0	0	0	0	0	0	0	0	0	0	0	0	0
sp|Q12955|ANK3_HUMAN	sp|Q12955|ANK3_HUMAN				0	0	0	2776600	0	2965300	6046800	3930400	0	0	0	0	0	0	4174900	4744500	6601400	0	4458100	3097500	2263400	0	0	3269500	0	0	0	0	8167000	0	0	2989100	0	0	0	0	0	0	0	0	2242200	0	0	0	0
sp|Q12959|DLG1_HUMAN;sp|Q15700|DLG2_HUMAN;sp|P78352|DLG4_HUMAN	sp|Q12959|DLG1_HUMAN				0	0	0	0	0	4260100	0	8512000	0	0	0	6408900	0	0	27604000	4655500	5728700	0	10107000	12340000	6722100	1538500	7905400	3402100	0	0	0	0	4128200	5974900	0	20873000	0	0	0	0	0	0	0	0	2396200	0	0	4552400	0
sp|Q12965|MYO1E_HUMAN;sp|O00160|MYO1F_HUMAN	sp|Q12965|MYO1E_HUMAN				0	0	0	2857600	0	3965900	4487600	2402600	0	0	0	0	0	0	744630	2760400	0	0	2055900	3117900	3630200	0	1135300	1639600	0	0	0	0	2807400	0	0	2723100	9006100	0	0	0	2832600	0	6006500	0	3512300	5347300	0	5146300	6008400
sp|Q12979|ABR_HUMAN	sp|Q12979|ABR_HUMAN				0	0	0	0	0	0	0	0	5766600	6737800	9304000	0	0	0	0	0	0	0	0	0	0	0	0	0	0	0	0	0	0	0	0	0	0	0	0	0	0	0	0	0	0	0	0	0	0
sp|Q12981|SEC20_HUMAN	sp|Q12981|SEC20_HUMAN				0	0	0	0	0	0	0	0	0	0	0	0	0	0	0	0	0	0	0	0	0	0	0	0	0	0	0	0	0	0	0	0	0	0	0	0	0	0	0	0	0	0	0	0	0
sp|Q12983|BNIP3_HUMAN	sp|Q12983|BNIP3_HUMAN				0	0	20991000	9741800	18306000	8056900	6265700	4624300	6081000	5211700	4087000	11990000	4134200	0	2933700	0	0	0	2713600	0	0	0	4286600	0	0	0	3853500	7635700	15759000	1061700	10256000	14258000	6500400	7442500	13891000	0	0	0	0	5442300	2924700	7110200	12464000	4139400	0
sp|Q13009|TIAM1_HUMAN	sp|Q13009|TIAM1_HUMAN				0	0	0	0	0	0	6461100	0	0	0	0	0	0	0	0	0	0	0	0	3987300	0	0	5648500	1452900	0	0	0	0	0	0	0	0	0	0	0	0	0	0	0	0	4711100	0	0	5393400	0
sp|Q13017|RHG05_HUMAN	sp|Q13017|RHG05_HUMAN				0	0	0	0	0	0	1275100	1786900	155720000	131160000	25335000	0	0	0	0	0	0	0	0	0	0	0	0	0	0	0	0	0	0	0	0	0	0	0	0	0	0	0	0	0	0	0	0	0	0
sp|Q13043|STK4_HUMAN	sp|Q13043|STK4_HUMAN				0	0	0	0	0	0	0	0	0	0	0	0	0	0	659690	0	0	0	0	0	0	0	0	0	0	0	0	0	0	0	0	0	0	0	0	0	0	0	0	0	0	0	0	0	0
sp|Q13045|FLII_HUMAN	sp|Q13045|FLII_HUMAN				0	0	0	0	0	0	0	0	0	0	0	0	0	0	0	0	0	0	0	0	0	0	0	0	0	0	0	0	583820	0	0	0	0	0	0	0	0	0	0	0	0	0	0	0	0
sp|Q13085|ACACA_HUMAN	sp|Q13085|ACACA_HUMAN				11302000000	11012000000	48909000000	39979000000	36804000000	14102000000	12054000000	18265000000	7505300000	18431000000	28087000000	6994800000	21853000000	19665000000	8605700000	16913000000	7980100000	27179000000	15980000000	11009000000	14766000000	28369000000	4435800000	62732000000	75856000000	27702000000	14960000000	36122000000	15425000000	23619000000	49852000000	25457000000	24037000000	20852000000	37189000000	40160000000	36164000000	59848000000	25145000000	37633000000	14055000000	27818000000	46603000000	17954000000	19982000000
sp|Q13103|SPP24_HUMAN	sp|Q13103|SPP24_HUMAN	+			0	0	0	0	0	0	0	0	0	0	0	0	0	0	0	0	0	0	0	0	0	0	0	0	0	0	0	0	0	0	0	0	0	0	0	0	0	0	0	0	0	0	0	0	0
sp|Q13123|RED_HUMAN	sp|Q13123|RED_HUMAN				6017400	0	0	0	0	0	0	0	0	0	0	0	0	0	0	0	0	0	0	0	0	0	0	0	0	0	0	0	0	0	0	0	0	0	0	1984300	0	0	2227500	0	0	0	0	0	7820600
sp|Q13131|AAPK1_HUMAN	sp|Q13131|AAPK1_HUMAN				0	0	0	0	0	0	0	0	0	0	0	0	0	0	0	0	0	0	0	0	0	0	0	0	0	0	0	0	0	0	0	0	0	0	0	0	0	0	0	0	0	0	0	0	0
sp|Q13136|LIPA1_HUMAN;sp|O75335|LIPA4_HUMAN	sp|Q13136|LIPA1_HUMAN				3687500	0	0	5722600	0	3309000	4065200	0	0	0	0	0	0	0	3730300	6862700	353760	2639500	4884900	3077600	33558000	0	2721000	5173900	0	7056100	0	0	19673000	0	0	9964100	3464300	0	0	7663700	0	0	3988500	0	4232200	0	0	4107100	4564600
sp|Q13144|EI2BE_HUMAN	sp|Q13144|EI2BE_HUMAN				0	0	0	384780	0	0	0	0	0	0	0	0	0	0	0	480950	0	0	0	0	0	0	0	0	0	0	0	0	142560	0	0	0	513600	0	0	0	0	0	0	0	0	0	0	0	0
sp|Q13148|TADBP_HUMAN	sp|Q13148|TADBP_HUMAN				0	0	0	0	0	0	533190	0	0	0	0	0	0	0	0	0	805420	0	0	0	0	0	0	0	0	0	0	0	0	0	0	0	0	0	0	0	0	0	0	0	602090	0	0	0	0
sp|Q13153|PAK1_HUMAN	sp|Q13153|PAK1_HUMAN				0	0	0	0	0	0	0	0	0	0	0	0	0	0	0	0	0	0	0	0	0	0	0	0	0	0	0	0	0	0	0	0	0	0	0	0	0	0	0	0	0	0	0	0	0
sp|Q13162|PRDX4_HUMAN	sp|Q13162|PRDX4_HUMAN				0	0	0	0	0	4620100	0	0	0	1650300	3571300	0	3228600	0	0	0	0	0	0	0	0	7465800	0	17959000	15298000	0	0	0	8702100	0	0	1970000	0	0	0	0	0	5827100	0	0	0	0	11060000	0	0
sp|Q13177|PAK2_HUMAN	sp|Q13177|PAK2_HUMAN				0	0	231340000	568540000	123080000	1055600	0	0	779010000	691040000	966850000	5160200	0	0	0	0	0	0	0	0	0	0	0	0	0	0	0	0	0	0	0	0	0	0	0	0	0	0	0	0	0	0	0	0	0
sp|Q13188|STK3_HUMAN	sp|Q13188|STK3_HUMAN				0	0	0	0	0	0	0	0	0	0	0	0	0	0	1087700	0	0	0	0	0	0	0	0	0	0	0	0	0	0	0	0	0	0	0	0	0	0	0	0	0	0	0	0	0	0
sp|Q13190|STX5_HUMAN	sp|Q13190|STX5_HUMAN				30289000	63001000	25228000	0	31075000	57538000	13642000	86132000	46154000	0	1582200	19797000	20915000	29920000	74031000	9684600	79795000	0	28893000	48645000	22628000	14278000	39972000	6924500	9187600	10736000	6493000	6301800	13958000	6322000	0	9579800	0	0	36013000	0	0	0	0	11608000	44696000	0	17469000	14709000	0
sp|Q13200|PSMD2_HUMAN	sp|Q13200|PSMD2_HUMAN				0	0	0	0	0	0	0	0	0	0	0	0	0	0	0	0	0	0	0	0	0	0	0	0	0	0	0	0	0	0	0	0	0	0	0	0	0	0	0	0	0	0	0	0	0
sp|Q13206|DDX10_HUMAN	sp|Q13206|DDX10_HUMAN				0	0	0	0	45697000	0	0	31751000	0	0	0	0	12499000	0	0	0	0	0	0	0	20959000	0	0	0	0	0	0	0	0	0	0	9747300	0	0	0	0	0	0	0	0	9036600	0	0	0	0
sp|Q13228|SBP1_HUMAN	sp|Q13228|SBP1_HUMAN				0	0	0	0	0	0	0	0	0	0	0	0	0	0	0	0	0	0	0	0	0	0	0	0	0	0	0	0	0	0	0	0	0	0	0	0	0	0	0	0	0	0	0	0	0
sp|Q13232|NDK3_HUMAN	sp|Q13232|NDK3_HUMAN				0	0	0	0	0	0	0	0	0	0	0	0	0	0	0	0	3811800	0	0	0	0	0	0	0	0	0	0	0	0	0	0	2150600	0	0	0	0	0	0	0	0	0	0	3028700	0	0
sp|Q13263|TIF1B_HUMAN	sp|Q13263|TIF1B_HUMAN				0	0	0	0	2437400	0	0	1636800	0	0	0	0	0	0	0	0	3494400	0	0	0	0	2922800	0	7722000	2930600	2398700	0	0	0	0	0	0	0	0	0	0	0	0	0	0	0	0	0	0	0
sp|Q13283|G3BP1_HUMAN	sp|Q13283|G3BP1_HUMAN				2380600	4501200	0	0	3193900	0	3758600	0	2301500	0	0	0	0	0	0	0	0	0	0	0	4162600	0	4316900	0	2155300	1891400	0	0	0	0	0	0	0	0	0	0	0	0	0	0	0	1670400	0	0	0
sp|Q13310|PABP4_HUMAN;sp|P0CB38|PAB4L_HUMAN	sp|Q13310|PABP4_HUMAN				0	0	0	0	0	0	0	0	0	0	0	0	0	0	0	0	0	0	0	3414100	0	0	0	0	0	0	0	0	0	0	0	0	0	0	0	0	0	0	27161000	0	0	0	0	0	0
sp|Q13315|ATM_HUMAN	sp|Q13315|ATM_HUMAN				0	0	0	0	0	0	0	0	0	0	0	0	0	0	0	0	0	0	0	0	0	0	0	0	0	0	0	0	0	0	0	0	0	0	0	0	0	0	0	0	0	0	0	0	0
sp|Q13325|IFIT5_HUMAN	sp|Q13325|IFIT5_HUMAN				2711200	0	0	0	0	4356100	3325600	17165000	0	2866400	4281300	9555300	4114600	2612300	20345000	3332400	8700500	3639900	18377000	7745000	3446200	0	0	1919800	1637900	0	8396200	5261300	10736000	6918400	6152500	10880000	5789800	0	5258200	0	0	2266200	18985000	1824600	28823000	10158000	1519200	26238000	0
sp|Q13330|MTA1_HUMAN;sp|Q9BTC8|MTA3_HUMAN;sp|O94776|MTA2_HUMAN	sp|Q13330|MTA1_HUMAN				0	0	0	0	0	0	0	0	0	0	0	0	0	0	0	0	0	0	0	0	0	0	0	0	0	0	0	0	0	0	0	0	0	0	0	0	0	0	0	0	0	0	0	0	0
sp|Q13370|PDE3B_HUMAN	sp|Q13370|PDE3B_HUMAN				0	0	0	0	0	0	0	0	0	0	0	0	0	0	0	0	0	0	0	0	0	0	0	3539500	0	0	0	0	0	0	0	0	0	0	0	0	0	0	0	0	0	0	0	3600800	0
sp|Q13371|PHLP_HUMAN;sp|P20941|PHOS_HUMAN	sp|Q13371|PHLP_HUMAN				5236400	6889200	14519000	4751900	21327000	30732000	10936000	44307000	0	0	2335100	0	6941600	13876000	25178000	0	3378600	0	6541900	3684800	15719000	9568400	61374000	5817300	2840900	0	79209000	155170000	87199000	31773000	49734000	21137000	7199800	0	38024000	0	0	13779000	11827000	71263000	38925000	0	59794000	16037000	0
sp|Q13395|TARB1_HUMAN	sp|Q13395|TARB1_HUMAN				0	0	0	0	0	0	0	0	0	0	0	0	0	0	0	0	0	0	0	0	0	0	0	0	0	0	0	0	0	0	0	0	0	0	0	0	0	0	0	0	0	0	0	0	0
sp|Q13416|ORC2_HUMAN	sp|Q13416|ORC2_HUMAN				0	0	0	0	0	0	0	0	0	0	0	0	0	0	0	0	0	0	0	0	0	0	0	0	0	0	0	0	0	0	0	0	0	0	0	0	0	0	0	0	0	0	0	0	0
sp|Q13423|NNTM_HUMAN	sp|Q13423|NNTM_HUMAN				0	0	0	0	0	0	0	0	0	0	0	0	0	0	0	0	0	0	0	0	0	0	0	5025300	28478000	51852000	0	0	0	0	0	0	0	0	0	0	0	0	0	0	0	0	0	0	0
sp|Q13425|SNTB2_HUMAN	sp|Q13425|SNTB2_HUMAN				0	0	0	0	0	0	0	0	0	0	0	0	0	0	0	0	0	0	0	0	0	0	0	0	0	0	0	0	0	0	0	0	0	0	0	0	0	0	0	0	0	0	0	0	0
sp|Q13427|PPIG_HUMAN	sp|Q13427|PPIG_HUMAN				0	3872300	0	12348000	7877300	0	0	0	0	0	0	0	0	0	0	43301000	0	46954000	0	0	2253800	0	0	0	0	15551000	0	15414000	0	2833800	0	0	0	0	102470000	4494700	13686000	128780000	0	0	1058700	0	0	2913100	0
sp|Q13428|TCOF_HUMAN	sp|Q13428|TCOF_HUMAN				660230000	859600000	144860000	413820000	565220000	130330000	234030000	234890000	1293200000	1396400000	708800000	422910000	1864700000	1849800000	265270000	848270000	226210000	1032800000	615100000	560370000	974470000	58909000	392910000	972870000	50682000	491710000	500690000	43977000	1028700000	187920000	175410000	943890000	2401800000	1492100000	290790000	1288100000	474700000	583900000	456810000	472100000	240320000	604160000	579490000	247260000	1005700000
sp|Q13433|S39A6_HUMAN	sp|Q13433|S39A6_HUMAN				0	0	0	0	0	0	0	1644300	0	0	0	0	0	0	0	1055600	1352400	1189200	0	1622200	0	0	0	0	0	0	0	0	1969400	0	0	2477300	0	0	0	0	0	0	0	0	0	0	0	0	0
sp|Q13435|SF3B2_HUMAN	sp|Q13435|SF3B2_HUMAN				0	0	0	0	0	0	0	0	0	0	0	0	12698000	0	0	0	0	0	0	0	0	0	0	0	0	0	0	0	0	0	0	0	0	0	0	0	0	0	0	0	0	0	0	0	0
sp|Q13439|GOGA4_HUMAN	sp|Q13439|GOGA4_HUMAN				42849000	0	135640000	40720000	84311000	471800000	370820000	471540000	581700000	62728000	58105000	730670000	59710000	59548000	940330000	446290000	466130000	444750000	577060000	974520000	563200000	607910000	897370000	186010000	46717000	102810000	98357000	43304000	526970000	87131000	0	406210000	0	3941300	0	0	0	0	5548300000	1554600000	7342400000	66204000	19928000	188260000	402530000
sp|Q13442|HAP28_HUMAN	sp|Q13442|HAP28_HUMAN				0	0	0	0	2239200	0	0	15659000	0	0	0	0	0	0	0	0	0	0	0	0	0	0	0	0	0	0	0	0	0	0	0	0	0	0	0	0	0	0	2861800	0	0	0	6153100	0	0
sp|Q13443|ADAM9_HUMAN	sp|Q13443|ADAM9_HUMAN				0	0	0	0	0	0	0	0	0	0	0	0	0	0	0	0	0	0	0	0	0	0	0	0	0	0	0	0	0	0	0	0	0	0	0	0	0	0	0	0	0	0	0	0	0
sp|Q13459|MYO9B_HUMAN	sp|Q13459|MYO9B_HUMAN				55696000	0	88885000	194190000	97893000	41629000	93860000	41515000	67085000	217370000	37518000	67455000	204840000	184030000	53064000	81528000	21428000	150310000	108770000	60834000	65873000	708470	49665000	160060000	7741800	219570000	0	0	53896000	0	0	126600000	181530000	293280000	43008000	265490000	76286000	17968000	0	18549000	12775000	0	19114000	0	76064000
sp|Q13464|ROCK1_HUMAN	sp|Q13464|ROCK1_HUMAN				0	0	1682400	2005900	6520000	41504000	3288900	25075000	13402000	7397900	48083000	0	0	0	6432600	1558100	6541200	6723700	26808000	27444000	11717000	1198900	0	3703500	0	0	4041800	0	18105000	5287500	3492400	19990000	0	0	1905700	0	0	0	7904400	5900200	48393000	0	3117100	16541000	0
sp|Q13480|GAB1_HUMAN	sp|Q13480|GAB1_HUMAN				0	0	0	0	0	0	0	0	0	0	0	0	0	0	4709000	0	4292200	0	0	1480500	0	2034800	4246900	0	0	0	2181800	0	3229600	2056400	0	2064100	0	0	0	0	0	0	0	0	0	0	0	1269300	0
sp|Q13492|PICAL_HUMAN;sp|O60641|AP180_HUMAN	sp|Q13492|PICAL_HUMAN				0	0	3697500	0	0	9298700	15165000	7531700	6725600	1231600	0	5941900	0	0	6453500	0	0	0	5314000	2452300	0	0	0	576050	0	2145300	0	1546500	0	2208400	7359900	0	0	0	0	0	0	0	0	0	5803600	0	0	4556000	0
sp|Q13501|SQSTM_HUMAN	sp|Q13501|SQSTM_HUMAN				0	0	0	0	0	0	0	0	0	0	0	0	0	0	0	0	0	0	0	0	0	0	0	0	1054500	0	0	0	0	0	0	0	0	0	0	0	0	0	0	0	0	0	0	0	0
sp|Q13505|MTX1_HUMAN	sp|Q13505|MTX1_HUMAN				0	0	0	0	0	0	0	0	0	0	0	0	0	0	0	0	0	0	0	0	0	0	0	0	0	0	0	0	0	0	0	0	0	0	0	0	0	0	0	0	0	0	0	0	0
sp|Q13509|TBB3_HUMAN	sp|Q13509|TBB3_HUMAN				0	0	0	0	0	0	0	0	0	1738800	2390200	0	0	0	0	0	0	0	0	0	0	0	0	0	0	4602600	0	0	2814700	0	0	0	4462100	0	0	0	0	0	0	0	0	0	0	0	0
sp|Q13523|PRP4B_HUMAN	sp|Q13523|PRP4B_HUMAN				0	0	0	10156000	2407300	0	0	0	0	0	0	0	0	0	0	17385000	2248400	40759000	1416800	1839600	0	0	0	0	0	4545200	0	0	348300	0	0	490050	0	9398700	0	0	16715000	28099000	0	0	5547200	0	0	9956200	0
sp|Q13535|ATR_HUMAN	sp|Q13535|ATR_HUMAN				0	0	0	0	0	0	0	0	0	0	0	0	0	0	0	0	0	0	0	0	14101000	0	0	0	0	0	0	0	0	0	0	0	0	0	0	0	0	0	0	0	0	0	0	5527600	0
sp|Q13546|RIPK1_HUMAN	sp|Q13546|RIPK1_HUMAN				0	0	0	3031900	0	0	0	0	0	0	0	0	0	0	0	0	0	0	0	0	0	0	0	0	0	0	0	0	0	3920500	0	0	0	0	0	0	0	0	0	0	0	0	0	2548300	0
sp|Q13561|DCTN2_HUMAN	sp|Q13561|DCTN2_HUMAN				0	0	0	0	0	0	0	0	0	0	0	0	0	0	0	0	0	0	0	0	0	0	0	0	0	0	0	0	0	0	0	0	0	0	0	0	0	0	0	0	0	0	0	0	0
sp|Q13573|SNW1_HUMAN	sp|Q13573|SNW1_HUMAN				3578400	0	0	0	0	0	1382000	0	0	0	0	0	0	0	0	0	0	0	0	0	0	0	0	0	0	0	0	0	0	0	0	0	0	0	0	0	0	0	0	0	0	0	0	0	0
sp|Q13576|IQGA2_HUMAN	sp|Q13576|IQGA2_HUMAN				0	0	965870000	390940000	588990000	0	0	905350	102660000	120340000	96707000	0	0	0	0	0	0	0	0	0	0	0	0	0	0	0	0	0	0	0	0	0	0	0	0	0	0	0	0	0	0	0	0	0	0
sp|Q13586|STIM1_HUMAN	sp|Q13586|STIM1_HUMAN				6165900	0	26110000	12104000	0	35661000	37005000	27428000	0	18771000	0	0	1007400	2025700	129380000	77236000	105240000	34726000	2805800	44804000	1142600	22871000	7753100	294090	4079200	0	0	0	43638000	0	0	0	1781400	0	6794400	0	0	0	0	0	806700	7895000	3173100	57084000	0
sp|Q13596|SNX1_HUMAN	sp|Q13596|SNX1_HUMAN				26738000	94829000	37001000	6473300	0	32789000	32423000	51277000	9966400	0	6550500	0	13135000	0	58881000	0	4168600	6965000	19342000	47142000	21777000	0	8193300	15191000	5434700	0	16803000	22055000	6927600	27127000	19412000	0	0	0	0	0	0	0	13284000	0	28310000	7106700	856800	56737000	0
sp|Q13608|PEX6_HUMAN	sp|Q13608|PEX6_HUMAN				0	0	0	0	0	0	0	0	0	0	0	0	0	0	0	0	0	0	0	0	0	0	0	0	0	0	0	0	1098100	0	0	0	0	0	0	0	0	0	0	0	0	0	0	0	0
sp|Q13613|MTMR1_HUMAN	sp|Q13613|MTMR1_HUMAN				0	0	0	0	0	0	4730200	4700300	0	0	0	0	0	0	0	0	0	0	0	4899500	17510000	19562000	51731000	0	0	0	0	0	0	0	0	0	0	0	0	0	0	0	0	0	0	0	0	0	0
sp|Q13614|MTMR2_HUMAN;sp|Q13496|MTM1_HUMAN	sp|Q13614|MTMR2_HUMAN				0	0	0	0	0	0	0	0	0	0	0	0	0	0	0	0	0	0	0	0	0	0	0	0	0	0	0	0	0	0	0	0	0	0	0	0	0	0	0	0	0	0	0	0	0
sp|Q13615|MTMR3_HUMAN;sp|Q9NYA4|MTMR4_HUMAN	sp|Q13615|MTMR3_HUMAN				0	0	0	0	0	0	0	0	0	0	0	0	0	0	0	0	0	0	0	0	0	817130	0	0	0	0	0	0	2754300	0	0	0	0	0	0	0	0	0	0	0	0	0	0	0	0
sp|Q13620|CUL4B_HUMAN;sp|Q13619|CUL4A_HUMAN	sp|Q13620|CUL4B_HUMAN;sp|Q13619|CUL4A_HUMAN				0	0	381620	425000	0	0	0	0	0	0	0	0	0	0	0	1022500	839180	0	0	740710	0	0	0	0	0	0	0	0	616470	0	0	0	0	0	0	0	0	0	0	0	0	0	0	598410	0
sp|Q13625|ASPP2_HUMAN	sp|Q13625|ASPP2_HUMAN				0	0	0	0	0	12816000	20230000	19765000	0	0	0	0	0	0	3865000	0	0	0	6756900	0	15894000	0	4001300	0	0	2611900	0	0	2021200	0	0	0	0	0	0	0	0	0	0	0	1767500	0	0	9506500	0
sp|Q13636|RAB31_HUMAN;sp|Q9UL26|RB22A_HUMAN	sp|Q13636|RAB31_HUMAN;sp|Q9UL26|RB22A_HUMAN				0	0	0	0	0	0	0	0	0	0	0	0	0	0	0	0	0	0	0	0	0	0	0	0	0	0	0	0	0	0	0	0	0	0	0	0	0	0	0	0	0	0	0	0	0
sp|Q13642|FHL1_HUMAN	sp|Q13642|FHL1_HUMAN				5388100	0	0	3795500	6309500	13498000	5817700	13714000	14837000	8151300	9291600	14405000	11488000	0	13403000	0	0	0	13131000	0	3682600	0	23495000	4184600	0	9305700	0	9486800	9040200	0	11253000	1439500	0	0	37253000	0	0	0	3283200	16042000	7580400	5724200	22958000	0	4202100
sp|Q13724|MOGS_HUMAN	sp|Q13724|MOGS_HUMAN				0	0	0	0	0	0	0	0	0	0	0	0	0	0	0	0	0	0	0	0	0	0	0	0	0	0	0	0	558940	0	0	0	0	0	0	0	0	0	0	0	0	0	0	0	0
sp|Q13748|TBA3C_HUMAN;sp|Q6PEY2|TBA3E_HUMAN	sp|Q13748|TBA3C_HUMAN;sp|Q6PEY2|TBA3E_HUMAN	+			0	0	0	0	0	0	0	0	0	0	0	0	0	0	0	0	0	0	0	0	0	0	0	0	0	0	0	0	0	0	0	0	0	0	0	0	0	0	0	0	0	0	0	0	0
sp|Q13813|SPTN1_HUMAN	sp|Q13813|SPTN1_HUMAN				0	0	0	0	0	0	0	0	0	0	0	0	0	0	1607600	2520100	1438200	0	0	1045400	0	0	0	0	0	0	0	0	2011600	0	0	0	0	0	0	0	0	0	0	0	0	0	0	0	0
sp|Q13823|NOG2_HUMAN	sp|Q13823|NOG2_HUMAN				72874000	0	0	23727000	1857900	0	4813600	2953800	0	0	0	0	3495100	0	0	25470000	0	11101000	0	0	2864300	0	0	2179800	0	1752700	0	0	3605900	0	0	15382000	65263000	24094000	0	46623000	13486000	0	0	0	1438300	15013000	0	526310	171860000
sp|Q13835|PKP1_HUMAN	sp|Q13835|PKP1_HUMAN				0	0	0	0	0	0	0	0	0	0	0	0	0	0	0	0	0	0	0	0	0	0	0	0	0	0	0	0	0	0	0	0	0	0	0	0	0	0	0	0	0	0	0	0	0
sp|Q13867|BLMH_HUMAN	sp|Q13867|BLMH_HUMAN				0	0	0	0	0	0	0	0	0	0	0	0	0	0	0	0	0	0	0	0	0	0	0	0	0	0	0	0	0	0	0	0	0	0	0	0	0	0	0	0	0	0	0	0	0
sp|Q13885|TBB2A_HUMAN	sp|Q13885|TBB2A_HUMAN				0	0	0	0	0	0	0	0	0	0	0	0	0	0	0	0	0	0	0	0	0	0	0	0	0	0	0	0	0	0	0	0	0	0	0	0	0	0	0	0	0	0	0	0	0
sp|Q6P1K8|T2H2L_HUMAN;sp|Q13888|TF2H2_HUMAN	sp|Q6P1K8|T2H2L_HUMAN;sp|Q13888|TF2H2_HUMAN				0	0	0	0	0	0	0	0	0	0	0	0	0	0	0	0	0	0	0	0	0	0	0	0	0	0	0	0	0	0	0	0	0	3751700	0	3883100	0	0	0	0	0	0	0	0	0
sp|Q13948|CASP_HUMAN	sp|Q13948|CASP_HUMAN				0	2563300	0	0	0	0	0	0	0	0	0	0	0	0	0	0	0	0	0	0	0	0	0	0	0	0	0	0	0	0	0	0	0	0	0	0	0	0	0	0	0	0	0	0	0
sp|Q14008|CKAP5_HUMAN	sp|Q14008|CKAP5_HUMAN				144200000	4958300	103200000	170000000	94892000	458050000	509460000	301110000	532200000	391380000	439710000	342260000	165840000	98065000	185500000	157700000	270110000	110920000	358500000	275480000	276810000	106380000	193090000	137180000	92725000	75742000	66662000	22926000	273290000	164290000	46909000	98851000	31647000	0	39745000	0	0	8744700	68345000	9680100	256460000	130220000	89602000	274590000	0
sp|Q14094|CCNI_HUMAN	sp|Q14094|CCNI_HUMAN				0	0	0	0	0	0	0	0	0	0	0	0	0	0	0	0	0	0	0	0	0	0	0	0	0	0	0	0	0	0	0	0	0	0	0	0	0	0	0	0	0	0	0	0	0
sp|Q14103|HNRPD_HUMAN;sp|O14979|HNRDL_HUMAN	sp|Q14103|HNRPD_HUMAN				0	8010500	0	0	0	4025000	0	0	3414800	0	581150	0	0	2489000	2788300	0	2535600	0	0	2731500	0	0	0	2323400	0	0	0	0	0	0	0	0	3369800	0	0	0	0	0	0	3000100	0	0	1855800	0	0
sp|Q14118|DAG1_HUMAN	sp|Q14118|DAG1_HUMAN				0	0	0	0	0	0	0	0	0	0	0	0	0	0	0	0	0	0	0	0	0	0	0	0	0	0	0	0	0	0	0	0	0	0	0	0	0	0	0	0	0	0	0	0	0
sp|Q14126|DSG2_HUMAN	sp|Q14126|DSG2_HUMAN				0	0	0	5516100	9316900	0	0	10631000	0	0	2661400	0	8336300	6441900	3861100	34916000	7688200	33926000	4051700	2309300	1267100	0	0	8521500	0	14258000	12949000	0	6472000	15354000	5284500	6760900	9939900	0	95579000	0	0	0	0	1751300	0	0	0	424290	0
sp|Q14137|BOP1_HUMAN	sp|Q14137|BOP1_HUMAN				0	0	14822000	24370000	6807500	8469700	12961000	0	0	5802500	0	7486200	17517000	23604000	5122100	18444000	6749100	18596000	0	8874900	17617000	1958000	2701400	2903500	0	12524000	1872100	0	17661000	0	0	29095000	35620000	2337500	0	8098400	29561000	0	4026700	2785900	3546100	10726000	0	1392700	16611000
sp|Q14139|UBE4A_HUMAN	sp|Q14139|UBE4A_HUMAN				0	0	0	10113000	0	4094800	9284500	0	0	0	0	3712900	0	0	17215000	7794400	12237000	4735300	11434000	10539000	3846500	0	0	2525800	0	0	0	0	3853500	0	0	3272100	0	0	0	0	0	0	0	0	1807500	0	0	5757200	0
sp|Q14145|KEAP1_HUMAN	sp|Q14145|KEAP1_HUMAN				0	0	0	0	0	0	4063400	3461200	0	0	0	0	1995900	5019900	0	0	0	0	0	0	0	0	0	0	0	0	0	0	0	0	0	0	0	0	0	0	0	0	0	4096700	0	4874300	3924200	0	0
sp|Q14147|DHX34_HUMAN	sp|Q14147|DHX34_HUMAN				0	0	0	0	0	0	0	0	0	0	0	0	0	0	0	419010	0	582070	0	0	0	0	0	0	0	0	0	0	0	0	0	0	0	0	0	0	0	0	0	0	0	0	0	0	0
sp|Q14152|EIF3A_HUMAN	sp|Q14152|EIF3A_HUMAN				0	0	0	0	0	0	4740800	1602500	0	0	0	0	0	0	0	0	4089300	0	2712800	0	3009400	0	0	1202600	12307000	0	0	0	1062100	0	0	0	0	0	0	0	0	0	0	0	0	0	0	913220	0
sp|Q14155|ARHG7_HUMAN	sp|Q14155|ARHG7_HUMAN				0	0	0	0	0	0	0	0	57999000	354800000	172630000	0	0	0	0	0	0	0	0	0	0	0	0	0	0	0	0	0	0	0	0	0	0	0	0	0	0	0	0	0	0	0	0	0	0
sp|Q14157|UBP2L_HUMAN	sp|Q14157|UBP2L_HUMAN				25819000	44005000	34241000	36990000	110480000	108840000	57363000	129700000	240730000	28525000	41551000	222780000	56083000	44731000	190180000	42893000	106000000	28067000	93862000	59767000	95071000	86848000	107550000	43830000	31673000	102620000	58461000	11180000	70370000	94974000	41972000	54922000	2230700	0	35297000	0	0	0	23004000	15037000	59168000	37312000	12668000	71001000	0
sp|Q14160|SCRIB_HUMAN;sp|Q9BTT6|LRRC1_HUMAN	sp|Q14160|SCRIB_HUMAN				0	0	0	4132900	1379500	3859900	94896000	29607000	0	0	0	0	2792100	3601000	43239000	67670000	63691000	1011200	14615000	8003700	1314100	0	0	3066100	0	0	0	0	58296000	15282000	0	16345000	0	0	0	0	0	0	0	0	1114700	0	0	0	0
sp|Q14161|GIT2_HUMAN	sp|Q14161|GIT2_HUMAN				0	0	0	0	0	0	0	0	0	51304000	19735000	20422000	0	0	0	0	0	0	0	0	0	0	0	0	0	0	0	0	0	0	0	0	0	0	0	0	0	0	0	0	0	0	0	0	0
sp|Q14185|DOCK1_HUMAN;sp|Q6V702|CD022_HUMAN	sp|Q14185|DOCK1_HUMAN				0	0	0	0	0	0	496500	0	0	0	0	712900000	564400000	1246400000	0	0	0	0	0	1215900	0	0	0	0	0	0	0	0	0	0	0	0	0	0	0	0	0	0	0	0	0	0	0	0	0
sp|Q14188|TFDP2_HUMAN	sp|Q14188|TFDP2_HUMAN	+			0	0	0	0	0	0	0	0	0	0	0	0	0	0	0	0	0	0	0	0	0	0	0	0	0	0	0	0	0	0	0	2813000	0	0	0	0	0	15170000	0	0	0	0	0	0	0
sp|Q14203|DCTN1_HUMAN	sp|Q14203|DCTN1_HUMAN				0	0	0	0	0	0	0	0	0	0	0	0	0	0	0	0	0	0	0	0	26995000	802750	2504500	3120600	0	0	0	443440	908340	0	0	0	0	0	0	0	0	0	0	0	0	0	0	0	0
sp|Q14204|DYHC1_HUMAN	sp|Q14204|DYHC1_HUMAN				0	0	0	0	0	0	0	0	0	0	0	0	0	0	0	0	20015000	0	0	0	4814700	0	0	76117000	9289400	7676300	0	0	4618200	0	0	1406200	0	0	0	0	0	0	0	0	0	0	0	0	0
sp|Q14207|NPAT_HUMAN	sp|Q14207|NPAT_HUMAN				0	0	0	0	0	0	0	0	0	0	0	0	0	0	0	0	0	0	0	0	0	0	0	5578700	0	0	0	0	0	0	0	0	0	0	0	0	0	0	0	0	0	0	0	0	0
sp|Q14241|ELOA1_HUMAN	sp|Q14241|ELOA1_HUMAN				12443000	0	0	20507000	3306400	0	0	0	0	17936000	0	0	48101000	50997000	0	35565000	0	39923000	0	0	18648000	0	0	25765000	0	37203000	0	0	0	7414000	0	12415000	44530000	76123000	37570000	48287000	25873000	66417000	0	53204000	0	2220200	25120000	0	34264000
sp|Q14247|SRC8_HUMAN	sp|Q14247|SRC8_HUMAN				139280000	171540000	276370000	203340000	103500000	217760000	183760000	267390000	149480000	270010000	190400000	24697000	140770000	244320000	431820000	176350000	293860000	185640000	208800000	206460000	201990000	144720000	196930000	71092000	40595000	74471000	217510000	518300000	161230000	334180000	567220000	102040000	169410000	57908000	186740000	89027000	38804000	130130000	273070000	100590000	171190000	188890000	258200000	355960000	92873000
sp|Q14258|TRI25_HUMAN	sp|Q14258|TRI25_HUMAN				0	0	0	0	0	0	2491100	0	0	0	0	0	0	0	0	0	0	0	302540	0	0	0	563650	0	0	0	0	0	0	0	0	0	0	0	0	0	0	0	0	0	0	0	0	0	0
sp|Q14315|FLNC_HUMAN	sp|Q14315|FLNC_HUMAN				0	0	0	24177000	0	18230000	15999000	0	0	0	0	30466000	0	0	0	8541200	0	8159100	0	33362000	6722900	10614000	41413000	73958000	25910000	16896000	0	0	16324000	15207000	28145000	0	0	0	0	0	0	0	0	0	3770400	0	0	0	0
sp|Q14318|FKBP8_HUMAN	sp|Q14318|FKBP8_HUMAN				27992000	7292000	142450000	128470000	74059000	94678000	131540000	100380000	128570000	255030000	235400000	106970000	305610000	326730000	80840000	64183000	86593000	68814000	106900000	95683000	64758000	108430000	81316000	30217000	35565000	32818000	117280000	173770000	88229000	106730000	210930000	103780000	185520000	93682000	504600000	73361000	74407000	168230000	281470000	243080000	207190000	140940000	191440000	135140000	199370000
sp|Q14331|FRG1_HUMAN	sp|Q14331|FRG1_HUMAN				5104700	0	0	5498000	4718300	2809300	0	0	8349400	7879700	7619100	5391400	21181000	0	0	0	0	2389200	2393800	0	3566300	0	0	0	0	2670600	0	0	0	0	0	0	35436000	24354000	0	36442000	26453000	0	0	25469000	0	8337800	12326000	0	22075000
sp|Q14353|GAMT_HUMAN	sp|Q14353|GAMT_HUMAN				0	0	0	0	0	0	0	0	0	0	0	0	0	0	0	0	0	0	0	0	0	0	0	0	0	0	0	0	0	0	0	0	0	0	0	0	0	0	0	0	0	0	0	0	0
sp|Q14457|BECN1_HUMAN	sp|Q14457|BECN1_HUMAN				0	0	0	0	0	0	0	0	0	0	0	0	0	0	0	0	0	0	0	0	0	0	0	0	0	0	0	0	0	0	0	0	0	0	0	0	0	0	0	0	0	0	0	0	0
sp|Q14498|RBM39_HUMAN	sp|Q14498|RBM39_HUMAN				2577100	0	1623500	0	2562700	0	0	0	0	0	0	0	1895900	0	0	0	0	0	0	0	0	0	0	1002700	0	0	0	0	0	0	871590	0	0	0	4255700	3924800	0	5870700	0	0	0	0	0	0	0
sp|Q14527|HLTF_HUMAN	sp|Q14527|HLTF_HUMAN				0	0	0	0	0	0	5471100	0	0	0	0	0	0	0	0	0	0	0	0	0	0	0	0	0	0	0	0	0	0	0	0	0	0	0	0	0	0	0	0	0	0	0	0	0	0
sp|Q14562|DHX8_HUMAN	sp|Q14562|DHX8_HUMAN				0	0	0	0	0	0	0	0	0	0	0	0	0	0	0	3805500	0	0	0	0	0	0	0	0	0	0	0	0	0	0	0	0	0	0	0	0	0	0	0	0	0	0	0	0	0
sp|Q14571|ITPR2_HUMAN	sp|Q14571|ITPR2_HUMAN				0	0	0	0	0	0	0	0	0	0	0	0	0	0	0	0	0	0	0	0	0	0	0	0	0	0	0	0	0	0	0	0	0	0	0	0	0	0	0	0	0	0	0	0	0
sp|Q14573|ITPR3_HUMAN	sp|Q14573|ITPR3_HUMAN				0	0	0	0	0	0	0	0	0	0	0	0	0	0	0	0	0	0	0	0	0	0	0	0	0	0	0	0	0	0	0	0	0	0	0	0	0	0	0	0	0	0	0	0	0
sp|Q14574|DSC3_HUMAN	sp|Q14574|DSC3_HUMAN				0	0	0	0	0	0	0	0	0	0	0	0	0	0	0	0	0	0	0	0	0	0	0	0	0	0	0	0	0	0	0	0	0	0	0	0	0	0	0	0	0	0	0	0	0
sp|Q14596|NBR1_HUMAN	sp|Q14596|NBR1_HUMAN				0	0	0	0	0	0	0	0	0	0	0	0	4897500	0	0	0	0	0	0	0	2391700	0	0	5064800	0	0	0	0	4816900	0	0	0	2868300	0	0	0	0	0	7178400	0	0	8595500	0	0	0
sp|Q14644|RASA3_HUMAN	sp|Q14644|RASA3_HUMAN				0	0	0	0	0	0	0	0	0	0	0	0	0	0	0	0	0	0	0	0	0	0	0	0	0	0	0	0	0	0	0	0	0	0	0	0	0	0	0	0	0	0	0	0	0
sp|Q14651|PLSI_HUMAN	sp|Q14651|PLSI_HUMAN				0	0	0	0	0	4934100	2918700	894120	0	0	0	0	0	0	0	0	2895600	0	1213500	2077000	0	0	0	114770	0	0	0	0	0	0	0	0	0	0	0	0	0	0	0	0	0	0	0	0	0
sp|Q14669|TRIPC_HUMAN	sp|Q14669|TRIPC_HUMAN				0	0	0	0	0	0	0	0	0	0	0	0	0	0	0	0	0	0	0	0	0	0	0	0	0	0	0	0	0	0	0	0	0	0	0	0	0	0	0	0	0	0	0	0	0
sp|Q14671|PUM1_HUMAN	sp|Q14671|PUM1_HUMAN				0	0	0	0	0	0	0	0	0	0	0	0	0	0	0	0	0	0	0	0	0	0	0	0	0	0	0	0	0	0	0	0	0	0	0	0	0	0	0	0	0	0	0	0	0
sp|Q14674|ESPL1_HUMAN	sp|Q14674|ESPL1_HUMAN				6249700	0	0	0	0	0	0	0	0	0	4419100	0	12155000	0	0	0	0	0	0	0	0	0	0	0	0	0	0	0	0	0	0	0	0	0	17210000	0	0	0	0	14732000	0	0	33774000	0	0
sp|Q14677|EPN4_HUMAN	sp|Q14677|EPN4_HUMAN				28855000	22430000	129630000	59231000	39325000	119880000	177380000	135600000	93881000	85635000	73385000	35549000	70356000	56917000	172050000	30866000	60007000	43164000	153440000	147980000	37144000	46259000	59406000	0	6107100	242420	128970000	66416000	92096000	160000000	85423000	70453000	48721000	20968000	27213000	21580000	17500000	16566000	146950000	28463000	149140000	123520000	49166000	259790000	47020000
sp|Q14680|MELK_HUMAN	sp|Q14680|MELK_HUMAN				0	0	0	0	0	0	0	0	0	0	0	0	0	0	0	0	0	0	0	0	0	0	0	0	0	0	0	0	0	0	0	0	0	0	0	0	0	0	0	0	0	0	0	0	0
sp|Q14683|SMC1A_HUMAN	sp|Q14683|SMC1A_HUMAN				0	0	4092300	11106000	42964000	3363000	2828400	8448400	0	0	2009500	0	8427700	0	4940700	4144700	0	0	2290900	0	66117000	0	4613200	58835000	0	33022000	0	0	1653800	0	0	7137900	62622000	2445200	0	23367000	0	0	8934600	0	4116900	10959000	0	0	47383000
sp|Q14684|RRP1B_HUMAN	sp|Q14684|RRP1B_HUMAN				79742000	118920000	459310000	620180000	514800000	167380000	266430000	139840000	75467000	1268000000	508040000	359420000	1480800000	1599900000	354820000	631560000	363470000	648040000	203170000	357980000	332540000	179790000	157060000	638960000	149040000	533370000	140940000	48586000	340970000	37053000	79880000	291510000	592750000	350160000	285250000	1103600000	582260000	1235800000	271190000	1257000000	264170000	331080000	752850000	338970000	366890000
sp|Q14686|NCOA6_HUMAN	sp|Q14686|NCOA6_HUMAN				0	0	0	0	0	0	0	0	0	0	0	0	0	0	0	0	0	0	0	0	0	0	0	0	0	0	0	0	0	0	0	0	0	0	0	0	0	0	0	0	0	0	0	0	0
sp|Q14687|GSE1_HUMAN	sp|Q14687|GSE1_HUMAN				0	0	0	0	0	0	0	0	0	0	11181000	0	0	0	0	0	0	0	0	0	0	0	0	0	0	0	0	0	0	0	0	0	0	0	0	0	0	0	0	0	0	0	0	0	0
sp|Q14692|BMS1_HUMAN	sp|Q14692|BMS1_HUMAN				0	0	0	0	0	0	0	0	0	0	0	0	0	0	0	0	0	0	0	0	0	0	0	2878700	0	0	0	0	0	0	0	0	0	0	0	0	0	0	0	0	0	0	0	0	0
sp|Q14694|UBP10_HUMAN	sp|Q14694|UBP10_HUMAN				0	0	0	0	0	6629400	5126400	4727300	0	0	0	0	0	0	1829400	2011300	2813900	0	3315100	5025000	3719700	1500700	2856300	1628400	0	0	0	0	3029700	0	0	2319000	0	0	0	0	0	0	0	0	3354500	0	0	8516100	0
sp|Q14697|GANAB_HUMAN	sp|Q14697|GANAB_HUMAN				0	0	0	0	3598700	0	0	0	0	0	0	0	0	0	0	0	3794600	0	0	0	6636500	0	0	11379000	0	0	0	0	0	0	0	0	0	0	0	0	0	0	0	0	0	0	0	0	0
sp|Q14728|MFS10_HUMAN	sp|Q14728|MFS10_HUMAN				0	0	0	0	0	0	0	0	0	0	0	0	0	0	0	0	0	0	0	0	0	0	0	0	0	0	0	0	0	0	0	0	0	0	0	0	0	0	0	0	0	0	0	0	0
sp|Q14738|2A5D_HUMAN	sp|Q14738|2A5D_HUMAN				0	0	0	0	0	0	0	0	0	0	0	0	0	0	0	0	0	0	0	0	0	0	0	0	0	0	0	0	0	0	0	0	0	0	0	0	0	0	0	0	0	0	0	0	0
sp|Q14739|LBR_HUMAN	sp|Q14739|LBR_HUMAN				1217700000	1910300000	197910000	196680000	21469000	193730000	222470000	302030000	149160000	36515000	21849000	100730000	52678000	31674000	501060000	974690000	294770000	666750000	456540000	467030000	323590000	68852000	264300000	445920000	68007000	278010000	277280000	173860000	252750000	236180000	143840000	151310000	168340000	65902000	376130000	101820000	62426000	27893000	218790000	5997900	321240000	470740000	20231000	421620000	147530000
sp|Q14789|GOGB1_HUMAN;REV__sp|Q8N884|CGAS_HUMAN;sp|Q9NZW5|MPP6_HUMAN	sp|Q14789|GOGB1_HUMAN				1077300000	0	1815700000	1600100000	1432900000	1177900000	578310000	1942100000	1717500000	1362900000	559660000	850350000	1045400000	1024700000	2084800000	1760900000	1229700000	1516200000	1342300000	1835700000	4199300000	4730500000	5514300000	1031000000	826560000	883680000	2501400000	0	2561600000	930340000	0	1942600000	1186600000	1528000000	1005300000	369110000	141500000	0	3046800000	2217900000	2813300000	787660000	189700000	1255200000	668590000
sp|Q14807|KIF22_HUMAN	sp|Q14807|KIF22_HUMAN				0	0	0	0	0	0	0	0	0	0	0	0	0	0	0	0	0	0	0	0	0	0	0	0	0	0	0	0	0	0	0	0	0	0	0	0	0	0	0	0	0	0	0	0	0
sp|Q14839|CHD4_HUMAN	sp|Q14839|CHD4_HUMAN				222540000	6812300	19746000	53575000	14102000	42999000	203750000	35725000	4849500	5607100	1613700	34960000	10558000	0	15716000	37125000	22450000	44368000	7879600	22460000	86482000	4846600	28282000	37458000	751640	38269000	13236000	0	88645000	0	0	90575000	4111300	48850000	134510000	32351000	0	41846000	32609000	26799000	3982600	0	21771000	11431000	0
sp|Q14847|LASP1_HUMAN	sp|Q14847|LASP1_HUMAN				0	0	0	0	0	0	1081400	0	0	0	0	0	0	0	0	0	0	0	0	553040	0	0	0	0	0	0	0	0	0	0	0	0	0	0	0	0	0	0	0	0	0	0	0	0	0
sp|Q14865|ARI5B_HUMAN	sp|Q14865|ARI5B_HUMAN	+			0	0	0	0	0	0	0	0	0	0	0	0	0	0	0	0	0	0	0	0	0	0	0	0	0	0	0	0	0	0	0	0	0	0	0	0	0	0	0	0	0	0	0	0	0
sp|Q14964|RB39A_HUMAN	sp|Q14964|RB39A_HUMAN				0	0	0	0	0	0	0	0	0	0	0	0	0	0	0	0	0	0	0	0	0	0	0	39295000	0	26543000	0	0	0	0	0	0	0	0	0	0	0	0	0	0	0	0	0	0	0
sp|Q14966|ZN638_HUMAN	sp|Q14966|ZN638_HUMAN				0	0	0	0	0	0	0	0	0	0	0	0	0	0	0	0	0	0	0	0	0	0	0	0	0	0	0	0	0	0	0	0	0	0	0	0	0	0	0	0	0	0	0	0	0
sp|Q14974|IMB1_HUMAN	sp|Q14974|IMB1_HUMAN				38140000	44076000	0	2435700	0	0	0	0	0	0	0	0	3750000	0	2855600	8737900	14799000	6186000	0	7420500	623170	0	0	18975000	2417000	18785000	4069900	0	1918700	0	0	0	10939000	0	0	14411000	0	0	16956000	0	0	76652000	0	0	10586000
sp|Q14978|NOLC1_HUMAN	sp|Q14978|NOLC1_HUMAN				0	0	0	0	0	0	0	0	0	0	0	0	0	0	0	0	0	0	0	0	0	0	0	0	0	0	0	0	0	0	0	0	0	0	0	0	0	0	0	0	0	0	0	0	0
sp|Q14980|NUMA1_HUMAN	sp|Q14980|NUMA1_HUMAN				98888000	0	0	17010000	4431600	22836000	156890000	21512000	7405300	1149300	0	8743200	1623300	2186500	12060000	12914000	17342000	16238000	6981200	19345000	49995000	34314000	40082000	28004000	698990	2389800	6193500	0	56085000	0	0	5468500	0	0	2342200	0	0	1430200	0	0	806460	1633100	0	625930	0
sp|Q14BN4|SLMAP_HUMAN	sp|Q14BN4|SLMAP_HUMAN				0	0	0	0	0	0	0	0	0	0	0	0	0	0	0	0	0	0	0	0	0	0	0	0	0	0	0	0	0	0	0	0	0	0	0	0	0	0	0	0	0	0	0	0	0
sp|Q14C86|GAPD1_HUMAN	sp|Q14C86|GAPD1_HUMAN				17122000	0	38956000	27782000	21616000	58264000	63191000	32328000	0	2869400	0	5340100	23001000	4563300	57646000	35339000	25514000	22868000	26626000	42586000	49005000	30791000	35911000	22756000	23113000	7479000	44176000	22775000	92214000	86100000	36806000	58721000	0	0	4447900	0	0	1135700	0	1454500	32961000	4747300	22030000	190810000	0
sp|Q14CX7|NAA25_HUMAN	sp|Q14CX7|NAA25_HUMAN	+			0	0	0	0	0	0	0	0	0	0	0	0	0	0	0	0	0	0	0	0	0	0	0	0	0	0	0	0	0	0	0	0	0	0	0	0	0	0	0	0	0	0	0	0	0
sp|Q15003|CND2_HUMAN	sp|Q15003|CND2_HUMAN				0	0	0	0	0	0	0	0	0	0	0	0	0	0	0	0	0	0	0	0	1507100	0	0	2655000	0	6617600	0	0	0	0	0	0	0	0	0	0	0	0	0	0	0	0	1081600	0	0
sp|Q15005|SPCS2_HUMAN	sp|Q15005|SPCS2_HUMAN				3189800	5468300	0	0	3510100	2253200	725630	5799400	1455300	0	0	0	0	0	0	0	2133500	0	0	0	0	0	3506900	0	797850	0	0	0	0	0	0	1351500	0	0	0	0	0	0	0	0	0	0	0	0	0
sp|Q15006|EMC2_HUMAN	sp|Q15006|EMC2_HUMAN				0	0	0	0	0	0	0	0	0	0	0	0	0	0	0	0	0	0	0	0	0	0	0	0	0	0	0	0	0	0	0	0	0	0	0	0	0	0	0	0	0	0	0	0	0
sp|Q15011|HERP1_HUMAN	sp|Q15011|HERP1_HUMAN				0	0	0	0	0	0	0	0	0	0	0	0	0	0	0	0	0	0	0	0	0	0	0	0	0	0	0	0	0	0	0	0	0	0	0	0	0	0	0	0	0	0	0	0	0
sp|Q15019|SEPT2_HUMAN	sp|Q15019|SEPT2_HUMAN				0	0	0	0	0	0	0	0	0	0	0	0	0	0	0	0	0	0	0	0	0	0	0	0	0	0	0	0	0	0	0	0	0	0	0	0	0	0	0	0	0	0	0	0	0
sp|Q15020|SART3_HUMAN	sp|Q15020|SART3_HUMAN				0	0	0	0	0	0	0	0	0	0	0	0	0	0	0	0	0	0	0	0	0	0	0	0	0	0	0	0	0	0	0	0	0	0	0	0	0	0	0	0	0	0	0	0	0
sp|Q15021|CND1_HUMAN	sp|Q15021|CND1_HUMAN				0	0	0	0	0	0	610450	0	0	0	0	0	0	0	0	0	0	0	0	0	0	0	0	0	1476900	0	0	0	0	0	0	0	0	0	0	0	0	0	0	0	0	0	0	0	0
sp|Q15025|TNIP1_HUMAN	sp|Q15025|TNIP1_HUMAN				0	0	0	0	0	0	0	0	0	0	0	0	1102100	0	0	0	0	0	0	0	0	0	0	0	0	0	2131900	0	0	736080	0	0	0	0	945170	0	0	0	2326900	0	1729700	0	0	1611400	0
sp|Q15029|U5S1_HUMAN	sp|Q15029|U5S1_HUMAN				0	0	0	0	0	0	0	0	0	0	0	0	0	0	0	0	0	0	0	0	2129100	0	626850	867800	0	0	0	0	0	0	0	0	0	0	0	0	0	0	0	0	0	0	0	0	0
sp|Q15031|SYLM_HUMAN	sp|Q15031|SYLM_HUMAN				0	0	0	0	0	0	0	0	0	0	0	0	0	0	0	0	0	0	0	0	0	5755500	0	4808800	15868000	45397000	0	0	0	0	0	0	0	0	0	0	0	0	0	0	0	0	0	0	0
sp|Q15032|R3HD1_HUMAN	sp|Q15032|R3HD1_HUMAN				0	0	0	0	0	697900	0	0	0	0	0	0	0	0	0	0	0	0	0	350050	0	0	0	0	0	0	0	0	0	0	0	0	0	0	0	0	0	0	0	0	0	0	0	0	0
sp|Q15036|SNX17_HUMAN	sp|Q15036|SNX17_HUMAN				0	0	0	0	0	0	0	0	0	0	0	0	0	0	0	0	0	0	0	0	0	0	0	0	0	0	0	0	0	0	0	0	0	0	0	0	0	0	4073900	0	7070300	0	0	0	0
sp|Q15042|RB3GP_HUMAN	sp|Q15042|RB3GP_HUMAN				0	0	0	0	0	0	5134300	18840000	0	0	0	0	0	0	33615000	0	32816000	10727000	23984000	33988000	168640000	367570000	152440000	0	1892400	0	0	0	31903000	8123100	0	551850	61878000	41298000	408290000	0	253710000	339900000	239850000	171650000	536680000	3672900	0	43615000	16694000
sp|Q15043|S39AE_HUMAN	sp|Q15043|S39AE_HUMAN				0	0	0	0	0	0	0	0	0	0	0	0	0	0	0	0	0	0	0	0	0	0	0	0	0	0	0	0	0	0	0	0	0	0	0	0	0	0	0	0	0	0	0	0	0
sp|Q15051|IQCB1_HUMAN	sp|Q15051|IQCB1_HUMAN				0	0	0	0	0	0	0	0	0	0	0	0	0	0	0	0	0	0	0	0	0	0	0	0	0	0	0	0	0	0	0	0	0	0	0	0	0	0	0	0	0	0	0	0	0
sp|Q15052|ARHG6_HUMAN	sp|Q15052|ARHG6_HUMAN				0	0	11402000	4057900	0	0	0	0	18379000	174370000	144940000	0	0	0	0	0	0	0	0	0	0	0	0	0	0	0	0	0	0	0	0	0	0	0	0	0	0	0	0	0	0	0	0	0	0
sp|Q15054|DPOD3_HUMAN	sp|Q15054|DPOD3_HUMAN				0	10065000	0	0	0	0	0	0	0	0	0	0	0	0	0	0	0	0	0	0	0	0	0	0	0	0	0	0	0	0	0	0	0	0	0	0	0	0	0	0	0	0	0	0	0
sp|Q15056|IF4H_HUMAN	sp|Q15056|IF4H_HUMAN				10067000	19160000	9887200	5044400	10569000	40334000	10744000	15549000	33133000	3299800	11090000	25877000	10220000	0	12972000	0	5058400	0	8050500	12287000	12713000	10023000	15997000	9338400	0	0	0	8532600	8314400	1938500	10199000	2115500	0	0	8140300	0	0	0	4393400	7934000	11788000	9429400	13032000	3012600	0
sp|Q15057|ACAP2_HUMAN;sp|Q96P50|ACAP3_HUMAN	sp|Q15057|ACAP2_HUMAN				0	0	0	0	0	0	0	0	0	0	0	0	0	0	0	0	0	0	0	0	0	51763000	0	0	0	0	1631300	845340	15935000	0	0	0	4063200	0	2863300	0	0	0	0	0	0	0	0	0	0
sp|Q15058|KIF14_HUMAN	sp|Q15058|KIF14_HUMAN				0	0	78800000	23683000	4033500	519010000	481830000	488680000	63677000	95829000	90818000	35964000	0	17065000	75044000	71978000	66821000	2037800	9060900	9707200	17016000	948680	5345100	25198000	3206500	3788400	0	0	7405800	0	0	1491300	0	0	0	0	0	0	0	0	9975100	0	0	57446000	0
sp|Q15063|POSTN_HUMAN	sp|Q15063|POSTN_HUMAN	+			0	0	0	0	0	0	0	0	0	0	0	0	0	0	0	0	0	0	0	0	0	0	0	0	0	0	0	0	0	0	0	0	0	0	0	0	0	0	0	0	0	0	0	0	0
sp|Q15070|OXA1L_HUMAN	sp|Q15070|OXA1L_HUMAN				0	0	0	0	0	0	0	0	0	0	0	0	0	0	0	0	0	0	0	0	0	0	0	2364600	2201100	6321300	0	0	0	0	0	0	0	0	0	0	0	0	0	0	0	0	0	0	0
sp|Q15072|OZF_HUMAN	sp|Q15072|OZF_HUMAN				0	0	0	0	0	0	0	0	0	2975600	1933100	0	2291400	0	0	0	0	0	0	0	0	0	0	0	0	0	0	0	0	0	0	0	0	0	0	0	0	3592700	0	6198500	0	0	0	0	0
sp|Q15075|EEA1_HUMAN	sp|Q15075|EEA1_HUMAN				0	0	0	0	0	0	0	0	0	0	0	0	0	0	0	0	0	0	0	0	0	0	0	0	0	0	0	0	0	0	0	0	0	0	0	0	0	0	41839000	82973000	36486000	0	0	0	0
sp|Q15084|PDIA6_HUMAN	sp|Q15084|PDIA6_HUMAN				0	2344600	0	0	0	0	0	0	0	0	0	0	0	0	0	0	0	0	0	0	0	0	0	6334600	3302700	4632900	0	0	0	0	0	0	0	0	0	0	0	0	0	0	0	0	1117700	0	0
sp|Q15125|EBP_HUMAN	sp|Q15125|EBP_HUMAN				0	0	0	0	0	0	0	0	0	0	0	0	0	0	0	0	1080000	0	0	0	0	0	0	0	0	0	0	0	0	0	0	0	0	0	0	0	0	0	0	0	0	0	0	0	0
sp|Q15149|PLEC_HUMAN	sp|Q15149|PLEC_HUMAN				0	0	0	0	0	0	0	0	0	0	0	0	0	0	0	0	5032700	0	0	0	2835700	0	0	0	0	12410000	0	0	0	0	0	0	0	0	0	0	0	0	0	0	0	0	0	0	0
sp|Q15154|PCM1_HUMAN	sp|Q15154|PCM1_HUMAN				0	0	0	0	0	0	0	0	0	0	0	0	0	0	0	0	0	14101000	0	0	0	0	15337000	0	0	0	0	0	2243300	0	0	0	0	0	0	0	0	0	0	11066000	0	0	0	0	0
sp|Q15181|IPYR_HUMAN	sp|Q15181|IPYR_HUMAN				0	0	0	0	0	0	0	0	0	0	0	0	0	0	0	0	0	0	0	0	0	0	1832500	0	0	0	0	0	0	0	0	0	0	0	0	0	0	0	0	0	0	0	0	0	0
sp|Q15185|TEBP_HUMAN	sp|Q15185|TEBP_HUMAN				0	0	0	0	0	0	0	0	0	0	0	0	0	0	0	0	2227400	0	0	0	0	0	0	0	0	0	0	0	0	0	0	0	0	0	0	0	0	0	0	0	0	0	0	0	0
sp|Q15208|STK38_HUMAN	sp|Q15208|STK38_HUMAN				6879100	2497000	8261500	8226200	6847000	38019000	33464000	22132000	5986100	0	13588000	7379200	14845000	11652000	10540000	0	8110000	0	11964000	4918700	4602100	0	0	3771900	0	0	11307000	12915000	10970000	9992100	15948000	9119200	0	0	23449000	0	0	0	0	0	36094000	0	11112000	12734000	0
sp|Q15233|NONO_HUMAN	sp|Q15233|NONO_HUMAN				4170100	0	0	2664300	0	2696500	14621000	9374300	8611800	0	0	0	0	0	5215900	0	8899500	0	0	0	5027200	0	1803100	9985200	1500200	0	0	0	1301500	0	0	1624300	0	0	0	0	0	0	0	0	6358900	0	0	8988100	0
sp|Q15276|RABE1_HUMAN	sp|Q15276|RABE1_HUMAN				0	0	0	0	0	0	0	0	0	0	0	0	0	0	0	0	0	0	0	0	1081200000	1171000000	994790000	0	0	0	737600000	200280000	386320000	0	0	0	0	0	0	0	0	0	4207800	0	6087100	0	0	0	0
sp|Q15311|RBP1_HUMAN	sp|Q15311|RBP1_HUMAN				0	0	0	2500100	6775600	0	0	0	0	16350000	0	0	8547600	20062000	0	0	0	0	0	0	0	0	0	15280000	0	0	0	0	1522800	5816800	0	9744400	28841000	28511000	0	76405000	38754000	0	0	7279700	0	8647800	0	0	18355000
sp|Q15334|L2GL1_HUMAN	sp|Q15334|L2GL1_HUMAN				0	0	4472000	6378400	0	1933100	4183400	0	0	0	0	0	0	0	4613900	0	2806200	2447300	0	0	0	0	0	0	0	0	0	0	0	0	0	3000700	0	0	0	0	0	0	0	0	0	0	0	4224300	0
sp|Q15361|TTF1_HUMAN	sp|Q15361|TTF1_HUMAN				0	0	99681000	86717000	47626000	36293000	29490000	18451000	0	83370000	42085000	23333000	69612000	71677000	33404000	33988000	17755000	44731000	35079000	44990000	68184000	24781000	5460200	114570000	89171000	27645000	3504600	2521500	52565000	6735500	7214300	64307000	7036700	0	327340000	0	49246000	330890000	0	345030000	31225000	6423500	358450000	28437000	0
sp|Q15365|PCBP1_HUMAN;sp|P57723|PCBP4_HUMAN	sp|Q15365|PCBP1_HUMAN				57019000	38013000	17413000	22564000	34742000	56360000	49639000	44059000	44691000	0	19287000	57649000	56942000	79899000	69200000	29646000	52450000	28328000	48815000	47919000	47500000	42865000	72895000	63012000	25187000	26466000	35906000	45186000	57861000	45569000	31906000	33152000	50315000	55709000	52268000	35978000	32496000	32078000	31356000	40713000	60432000	42784000	47656000	52023000	34335000
sp|Q15366|PCBP2_HUMAN	sp|Q15366|PCBP2_HUMAN				39397000	33268000	34298000	15558000	22854000	51104000	55354000	33900000	28068000	0	1664300	53806000	12981000	40608000	59794000	23351000	51225000	24189000	32590000	50304000	21103000	41558000	60973000	12643000	29117000	29384000	23184000	28147000	47378000	26634000	23671000	16003000	31286000	24458000	14628000	16764000	15362000	10993000	16480000	15368000	60103000	18188000	28027000	39624000	29833000
sp|Q15382|RHEB_HUMAN	sp|Q15382|RHEB_HUMAN				0	0	0	0	0	7769100	0	0	6669900	0	0	9345200	0	0	0	0	4246900	0	7518800	0	0	0	0	0	0	0	0	0	0	0	0	3922500	0	0	0	0	0	0	0	0	0	0	0	0	0
sp|Q15386|UBE3C_HUMAN	sp|Q15386|UBE3C_HUMAN				0	0	0	0	0	0	0	0	0	0	0	0	0	0	0	0	0	0	0	0	0	0	0	0	0	0	0	0	0	0	0	0	0	0	0	0	0	0	0	0	0	0	0	0	0
sp|Q15388|TOM20_HUMAN	sp|Q15388|TOM20_HUMAN				42793000	0	0	4028300	0	0	8228000	0	6805500	4880400	3611800	7744300	9056100	8615900	0	0	12467000	0	9765000	23826000	0	0	0	9209900	0	26301000	0	0	0	5044800	0	3399500	15862000	0	5889800	20355000	0	0	8357300	4840000	6482000	0	0	0	0
sp|Q15390|MTFR1_HUMAN	sp|Q15390|MTFR1_HUMAN				0	0	5455200	0	14290000	26343000	9229800	16926000	8478700	2425900	6556000	18511000	17748000	14829000	25423000	0	10328000	0	11318000	25434000	7146300	17509000	10020000	6025000	0	0	22199000	40998000	20326000	25501000	38327000	16187000	18557000	19017000	13569000	0	12998000	15344000	21220000	39597000	44723000	16555000	14452000	6059100	8186900
sp|Q15392|DHC24_HUMAN	sp|Q15392|DHC24_HUMAN				11963000	21766000	0	0	0	0	0	0	0	0	0	0	0	0	0	0	0	0	0	0	0	0	0	0	0	0	0	0	0	0	0	0	0	0	0	0	0	0	0	0	0	0	0	0	0
sp|Q15393|SF3B3_HUMAN	sp|Q15393|SF3B3_HUMAN				0	0	0	0	0	0	0	0	0	0	0	0	0	0	0	0	0	0	0	0	0	0	0	2886400	4050600	5857600	0	0	0	0	0	0	0	0	0	0	0	0	0	0	0	0	0	0	0
sp|Q15398|DLGP5_HUMAN	sp|Q15398|DLGP5_HUMAN				0	0	0	0	4342800	0	0	4581000	0	0	0	0	0	0	1253500	3142700	0	0	3608200	0	2694400	1551700	1818200	0	0	4335100	0	0	2381100	0	0	2628300	0	0	0	0	0	0	0	0	0	0	0	1593100	0
sp|Q15417|CNN3_HUMAN	sp|Q15417|CNN3_HUMAN				1701100	0	10425000	10448000	33380000	46282000	26364000	47599000	10458000	0	13229000	55140000	17820000	58491000	51009000	0	25752000	0	19880000	17935000	30353000	22678000	44362000	21180000	3171000	1895800	7829900	16399000	7733700	3916300	13320000	0	9511700	0	16546000	0	4571500	0	0	44819000	49617000	0	39040000	32741000	0
sp|Q15418|KS6A1_HUMAN;sp|P51812|KS6A3_HUMAN	sp|Q15418|KS6A1_HUMAN;sp|P51812|KS6A3_HUMAN				0	0	0	0	0	0	3200300	0	0	0	0	0	0	0	0	0	0	0	0	0	0	0	0	0	0	0	0	0	0	0	0	0	0	0	0	0	0	0	0	0	0	0	0	0	0
sp|Q15431|SYCP1_HUMAN	sp|Q15431|SYCP1_HUMAN				0	0	0	0	0	0	0	0	4931300	0	10113000	0	0	0	0	0	0	0	8334700	0	0	0	0	0	17262000	0	0	0	0	0	0	0	0	0	0	0	0	35041000	0	0	46278000	21606000	0	0	0
sp|Q15437|SC23B_HUMAN	sp|Q15437|SC23B_HUMAN				0	0	0	0	0	0	0	0	0	0	0	0	0	0	0	0	0	0	0	0	0	0	0	0	0	0	0	0	0	0	0	0	0	0	0	0	0	0	0	0	0	0	0	0	0
sp|Q15459|SF3A1_HUMAN	sp|Q15459|SF3A1_HUMAN				0	0	0	0	0	0	0	0	0	0	0	0	0	0	0	0	0	0	0	0	0	0	0	0	0	0	0	0	0	0	0	0	0	0	0	0	0	0	0	0	0	0	0	0	0
sp|Q15464|SHB_HUMAN	sp|Q15464|SHB_HUMAN				0	0	0	0	0	0	0	0	0	294650	780290	0	318880	0	0	0	0	0	0	0	0	0	0	0	0	0	0	0	0	0	0	0	0	0	0	0	0	0	0	0	0	0	246460	0	0
sp|Q15506|SP17_HUMAN	sp|Q15506|SP17_HUMAN				0	0	0	0	0	0	0	0	0	0	0	0	0	0	0	0	0	0	0	0	0	0	0	0	0	0	0	0	0	0	0	0	0	0	0	0	0	0	0	0	0	0	0	0	0
sp|Q15517|CDSN_HUMAN	sp|Q15517|CDSN_HUMAN				0	0	0	0	0	0	0	0	0	0	0	0	0	0	0	0	0	0	0	0	0	0	0	0	0	0	0	0	0	0	0	0	0	0	0	0	0	0	0	0	0	0	0	0	0
sp|Q15545|TAF7_HUMAN	sp|Q15545|TAF7_HUMAN				0	0	0	0	0	0	0	0	0	0	0	0	0	0	0	0	0	0	0	0	0	0	0	0	0	0	0	0	0	0	0	0	0	0	0	0	0	0	0	0	0	0	0	0	0
sp|Q15555|MARE2_HUMAN	sp|Q15555|MARE2_HUMAN				0	0	0	0	0	0	0	0	0	0	0	0	0	0	810040	0	0	0	0	0	165900	0	0	0	0	0	0	0	0	0	0	0	0	0	0	0	0	0	0	0	0	0	0	0	0
sp|Q15572|TAF1C_HUMAN	sp|Q15572|TAF1C_HUMAN				0	0	0	1222700	0	0	0	0	0	0	0	0	1230900	0	0	756130	0	0	0	0	0	0	0	0	0	0	0	0	466740	0	0	397880	0	0	0	0	0	0	1720100	839510	0	1636500	0	0	0
sp|Q15596|NCOA2_HUMAN	sp|Q15596|NCOA2_HUMAN				0	0	0	0	0	0	0	0	0	0	0	0	0	0	0	0	0	0	0	0	0	0	0	0	0	0	0	0	0	0	0	0	0	0	0	0	0	0	0	0	0	0	0	0	0
sp|Q15637|SF01_HUMAN	sp|Q15637|SF01_HUMAN				0	2718800	0	0	0	0	0	3040700	2236200	1382000	0	0	2846300	2230700	2790100	0	0	0	1750700	0	0	0	0	0	0	0	0	0	0	0	0	0	0	0	1201700	0	0	0	0	0	2506500	0	0	2202700	0
sp|Q15643|TRIPB_HUMAN	sp|Q15643|TRIPB_HUMAN				56836000	0	150600000	120010000	264650000	382620000	223310000	566720000	1162900000	527600000	415680000	521180000	152130000	111300000	386490000	299280000	444490000	282990000	635170000	398790000	2417200000	1947500000	1897900000	257050000	105760000	133700000	511210000	55856000	1162000000	132230000	0	279720000	683750000	532310000	566770000	1814200	0	0	5545800000	2057100000	5433300000	221160000	54043000	239460000	73111000
sp|Q15645|PCH2_HUMAN	sp|Q15645|PCH2_HUMAN				0	0	0	0	0	0	0	0	0	0	0	0	0	1531300	0	0	0	0	0	0	0	0	0	0	0	0	0	0	0	0	0	0	0	0	0	0	7091900	0	3688300	0	0	0	0	0	0
sp|Q15648|MED1_HUMAN	sp|Q15648|MED1_HUMAN				4951700	0	0	2634600	0	1839000	2774000	802330	0	0	0	0	0	0	1148000	1738200	2353600	0	0	1161700	0	0	0	766070	0	0	0	0	403070	0	0	0	0	2278200	0	1710900	0	1501400	0	1198200	0	0	0	1723000	0
sp|Q15652|JHD2C_HUMAN	sp|Q15652|JHD2C_HUMAN				0	0	0	0	1777900	361930	1054300	3266700	0	0	0	0	0	0	0	0	0	0	762150	0	2823000	0	0	1260300	0	0	0	0	0	0	0	0	0	0	359400	0	0	0	0	0	0	0	0	0	0
sp|Q15654|TRIP6_HUMAN	sp|Q15654|TRIP6_HUMAN				0	0	0	0	0	0	0	0	0	0	2159800	0	0	0	0	0	0	0	0	0	0	0	0	0	0	0	0	0	0	0	0	0	0	0	0	0	0	0	0	0	0	0	0	0	0
sp|Q15678|PTN14_HUMAN	sp|Q15678|PTN14_HUMAN				0	0	0	1583000	1435000	0	0	0	0	0	0	0	0	0	0	0	0	0	0	0	1271600	0	0	0	0	0	0	0	2457000	0	0	1222000	0	0	0	0	0	0	0	0	0	0	0	0	0
sp|Q15691|MARE1_HUMAN	sp|Q15691|MARE1_HUMAN				0	0	0	0	0	0	0	0	0	0	0	0	0	0	0	0	0	0	0	0	0	0	0	0	0	0	0	0	0	0	0	0	0	0	0	0	0	0	0	0	0	0	0	0	0
sp|Q15717|ELAV1_HUMAN	sp|Q15717|ELAV1_HUMAN				0	0	0	0	0	0	0	0	0	0	0	0	0	0	0	0	0	0	0	0	0	0	0	0	0	0	0	0	0	0	0	0	0	0	0	0	0	0	0	0	0	0	0	0	0
sp|Q15723|ELF2_HUMAN	sp|Q15723|ELF2_HUMAN				0	0	0	0	0	0	0	0	0	0	0	0	0	0	0	0	0	0	0	0	0	0	0	0	0	0	0	0	0	0	0	0	0	0	0	0	0	0	0	0	0	0	0	0	0
sp|Q15738|NSDHL_HUMAN	sp|Q15738|NSDHL_HUMAN				67486000	34294000	4070800	0	0	24824000	4012700	13064000	0	0	0	0	2933300	1990300	29765000	0	15331000	0	4232200	4887900	0	0	12216000	723830	0	0	0	0	18291000	0	0	0	0	0	0	0	0	0	0	0	0	0	2308800	0	0
sp|Q15750|TAB1_HUMAN	sp|Q15750|TAB1_HUMAN				0	0	0	0	0	0	0	0	0	0	0	0	0	0	0	0	0	0	0	0	0	0	0	0	0	0	0	0	0	0	0	0	0	0	0	0	0	0	0	0	0	0	0	0	0
sp|Q15751|HERC1_HUMAN	sp|Q15751|HERC1_HUMAN				0	0	0	0	0	0	0	0	0	0	0	0	0	0	0	0	0	0	0	0	0	0	11782000	8133500	30646000	4109400	0	0	0	0	0	0	0	0	0	0	0	0	0	0	0	0	0	0	0
sp|Q15758|AAAT_HUMAN	sp|Q15758|AAAT_HUMAN				465710000	419500000	128440000	90526000	76454000	129540000	167450000	182660000	124710000	38583000	49437000	101130000	57638000	26338000	217610000	201090000	197080000	108260000	176840000	139520000	53656000	18054000	55756000	47611000	48347000	36977000	139860000	70613000	169540000	160340000	93529000	158100000	43963000	52883000	581270	69401000	53493000	0	61757000	7106600	32402000	113470000	9802500	60972000	115470000
sp|Q15771|RAB30_HUMAN;sp|Q15286|RAB35_HUMAN	sp|Q15771|RAB30_HUMAN				0	0	0	0	0	0	0	0	0	0	0	0	0	0	0	0	0	0	0	0	0	0	0	0	0	0	0	0	0	0	0	0	0	0	0	0	0	0	0	0	0	0	0	0	64103000000
sp|Q15785|TOM34_HUMAN	sp|Q15785|TOM34_HUMAN				0	0	0	0	0	0	0	0	0	0	0	0	0	0	0	0	0	0	0	0	0	0	0	0	0	0	0	0	0	0	0	0	0	0	0	0	0	0	0	0	0	0	0	0	0
sp|Q15811|ITSN1_HUMAN;CON__ENSEMBL:ENSBTAP00000001528	sp|Q15811|ITSN1_HUMAN;CON__ENSEMBL:ENSBTAP00000001528			+	0	0	1766900	0	0	4004500	0	3439200	0	0	0	3765300	0	0	4756900	0	0	0	0	0	0	0	0	0	0	0	0	0	5743700	0	0	0	0	0	0	0	0	0	0	0	0	0	0	0	0
sp|Q15813|TBCE_HUMAN;sp|Q8WVB6|CTF18_HUMAN	sp|Q15813|TBCE_HUMAN				0	0	0	0	0	0	0	0	0	0	0	0	0	0	2442800	0	0	0	0	0	0	0	0	2436000	0	0	0	0	0	0	0	0	0	0	0	0	0	0	0	0	0	0	0	0	0
sp|Q15819|UB2V2_HUMAN;sp|Q13404|UB2V1_HUMAN	sp|Q15819|UB2V2_HUMAN;sp|Q13404|UB2V1_HUMAN				0	0	0	0	0	0	0	0	0	0	0	0	0	0	0	0	2306000	0	0	1261300	0	0	0	0	0	0	0	0	0	0	0	0	0	0	0	0	0	0	0	0	0	0	0	0	0
sp|Q15836|VAMP3_HUMAN	sp|Q15836|VAMP3_HUMAN				122630000	71210000	20844000	63893000	48047000	79284000	52249000	99577000	187650000	59636000	61353000	149430000	41090000	72583000	72193000	25313000	223450000	11120000	68413000	170090000	18486000	35650000	95903000	12059000	10952000	39803000	33062000	38871000	35308000	29276000	17771000	66993000	8242200	0	29484000	7932600	9888600	0	0	6166100	21332000	44988000	26399000	35174000	12842000
sp|Q15907|RB11B_HUMAN	sp|Q15907|RB11B_HUMAN				0	0	87723000	47433000	15818000	68724000	31604000	48278000	57316000	8019500	6767200	30972000	9855300	5951900	48668000	0	30789000	0	50555000	3065500	6649100	0	42996000	14339000	10260000	19272000	37304000000	51627000000	17564000000	34123000000	76965000000	22909000000	29884000	29644000	138370000	0	13690000	0	33769000	8999900	35252000	59186000	10466000	35472000	24525000
sp|Q15942|ZYX_HUMAN	sp|Q15942|ZYX_HUMAN				0	0	0	3473700	0	0	3985400	2058500	0	0	7727200	0	9096000	3259000	12848000	0	0	0	0	7362600	4920800	0	4750900	4737500	1250000	1796600	2306100	6791500	0	6033300	5590900	0	0	0	3760500	0	0	0	0	0	3952500	0	4216900	12883000	0
sp|Q16181|SEPT7_HUMAN;sp|Q6ZU15|SEP14_HUMAN	sp|Q16181|SEPT7_HUMAN				2473600	0	15331000	6542900	11712000	2760200	0	0	0	0	0	0	0	0	0	0	2310300	0	0	0	0	0	0	0	0	0	0	0	2081200	0	0	0	0	0	0	0	0	0	0	4512600	0	0	0	0	0
sp|Q16204|CCDC6_HUMAN	sp|Q16204|CCDC6_HUMAN				0	0	0	0	0	0	0	0	0	0	0	0	0	0	0	0	0	0	0	0	0	0	0	0	0	0	0	0	0	0	0	0	0	0	0	0	0	0	0	0	0	0	0	0	0
sp|Q16378|PROL4_HUMAN	sp|Q16378|PROL4_HUMAN				0	0	0	0	0	0	0	0	0	0	0	0	0	0	0	0	0	0	0	0	8711200	0	0	0	0	0	0	0	0	0	0	0	0	0	0	0	0	0	0	0	0	0	0	0	0
sp|Q16512|PKN1_HUMAN	sp|Q16512|PKN1_HUMAN				0	0	0	0	0	0	0	0	0	0	0	0	0	0	0	0	0	0	0	0	0	0	0	0	0	0	0	0	0	0	0	0	0	0	0	0	0	0	0	0	0	0	0	0	0
sp|Q16513|PKN2_HUMAN	sp|Q16513|PKN2_HUMAN				0	0	6328400	2500000	0	29368000	27755000	26066000	2612300	181820000	66607000	43055000	1940600	1863500	18598000	2804100	10044000	0	9907600	7216300	5382100	2174100	1916800	0	0	0	0	0	15497000	0	0	3143800	0	0	1590400	0	0	0	5114900	0	136910000	0	0	5030300	0
sp|Q16527|CSRP2_HUMAN	sp|Q16527|CSRP2_HUMAN				0	0	0	0	0	0	0	0	0	2185500	1349400	0	0	0	0	0	2624700	0	0	0	0	0	0	0	0	0	0	0	0	0	0	0	0	0	0	0	0	0	0	0	0	0	0	0	0
sp|Q16543|CDC37_HUMAN	sp|Q16543|CDC37_HUMAN				4851300	0	0	0	0	3043300	0	1997300	0	0	0	0	2862700	0	0	0	0	0	4295100	0	1075100	0	4353200	0	7501500	4614000	0	0	0	0	0	0	0	0	5291000	0	0	6006800	2477000	7985900	5579500	0	5550200	0	0
sp|Q16555|DPYL2_HUMAN	sp|Q16555|DPYL2_HUMAN				0	0	0	0	0	0	0	0	0	0	0	0	0	0	0	0	0	0	0	0	0	0	0	0	0	0	0	0	0	0	0	0	0	0	0	0	0	0	0	0	0	2440600	0	0	0
sp|Q16566|KCC4_HUMAN	sp|Q16566|KCC4_HUMAN				0	0	0	0	0	0	0	0	0	0	0	0	0	0	0	0	0	0	0	0	0	0	0	0	0	0	0	0	0	0	0	0	0	0	0	0	0	0	0	0	0	0	0	0	0
sp|Q16576|RBBP7_HUMAN;sp|Q09028|RBBP4_HUMAN	sp|Q16576|RBBP7_HUMAN;sp|Q09028|RBBP4_HUMAN				2451400	0	0	0	0	0	0	0	0	0	0	0	0	0	0	0	0	0	0	0	0	0	0	2152100	0	0	0	0	0	0	0	0	0	0	0	0	0	0	0	0	0	0	0	0	0
sp|Q16625|OCLN_HUMAN	sp|Q16625|OCLN_HUMAN				0	0	0	0	0	0	0	0	0	0	0	0	0	0	0	0	0	0	0	0	0	0	0	0	0	0	0	0	0	0	0	0	0	0	0	0	0	0	0	0	0	0	0	0	0
sp|Q16629|SRSF7_HUMAN	sp|Q16629|SRSF7_HUMAN				0	0	0	0	0	0	0	0	0	0	0	0	0	0	0	0	0	0	0	0	0	0	0	0	0	0	0	0	0	0	0	0	0	0	0	0	0	0	0	0	0	0	0	0	0
sp|Q16630|CPSF6_HUMAN	sp|Q16630|CPSF6_HUMAN				0	0	0	0	0	0	6803700	0	0	0	0	0	0	0	0	0	0	0	0	0	0	0	0	0	0	0	0	0	0	0	0	0	0	0	0	0	0	0	0	0	2113900	0	0	0	0
sp|Q16637|SMN_HUMAN	sp|Q16637|SMN_HUMAN				0	0	0	0	0	0	0	0	0	0	0	0	0	0	0	0	0	0	0	0	0	0	0	0	0	0	0	0	0	0	0	0	0	0	0	0	0	0	0	0	0	0	0	0	0
sp|Q16643|DREB_HUMAN	sp|Q16643|DREB_HUMAN				0	0	6413500	0	0	0	0	0	0	0	0	0	0	0	0	0	0	0	0	0	0	0	0	0	0	0	0	0	0	0	0	0	0	0	0	0	0	0	0	0	0	0	0	0	0
sp|Q16650|TBR1_HUMAN	sp|Q16650|TBR1_HUMAN				0	0	3450000	4349900	1013600	3177600	5130100	955790	0	0	0	0	0	0	0	1487300	3290500	3522700	0	0	0	2104300	0	1769400	5082700	3612400	0	0	1231300	0	0	1709200	2195100	0	0	3875000	2544600	0	2344500	0	2860800	2724800	0	818660	0
sp|Q16698|DECR_HUMAN	sp|Q16698|DECR_HUMAN				0	0	0	0	0	0	0	0	0	0	0	0	0	0	0	0	0	0	0	0	0	0	0	0	0	0	0	0	0	0	0	0	0	0	0	0	0	31250000	0	0	0	0	0	0	0
sp|Q16720|AT2B3_HUMAN	sp|Q16720|AT2B3_HUMAN	+			0	0	0	0	0	0	0	0	0	0	0	0	0	0	0	0	0	0	0	0	0	0	0	0	0	0	0	0	0	0	0	0	0	0	0	0	0	0	0	0	0	0	0	0	0
sp|Q16760|DGKD_HUMAN	sp|Q16760|DGKD_HUMAN				0	0	0	0	0	0	0	0	0	0	0	0	0	0	0	0	0	0	0	0	0	0	0	0	0	0	0	0	0	0	0	0	0	0	0	0	0	0	0	0	0	0	0	0	0
sp|Q16799|RTN1_HUMAN	sp|Q16799|RTN1_HUMAN				0	0	0	0	0	0	0	0	0	0	0	0	0	0	0	0	0	0	0	0	0	0	0	0	0	0	0	0	0	0	0	0	0	0	0	0	0	0	0	0	0	0	0	0	0
sp|Q16822|PCKGM_HUMAN	sp|Q16822|PCKGM_HUMAN				0	0	3041400	0	0	0	0	0	0	0	0	0	2356900	0	0	0	0	0	0	0	0	0	0	0	0	0	0	0	0	0	0	0	0	0	0	0	0	0	0	0	0	0	0	0	0
sp|Q16836|HCDH_HUMAN	sp|Q16836|HCDH_HUMAN				0	0	0	0	0	0	0	0	0	0	0	0	0	0	0	0	0	0	0	0	0	0	0	0	0	0	0	0	0	0	0	0	0	0	0	0	0	0	0	0	0	0	0	0	0
sp|Q16850|CP51A_HUMAN	sp|Q16850|CP51A_HUMAN				0	0	0	0	0	0	0	675290	0	0	0	0	0	0	904490	0	0	0	942240	635650	60792	0	0	154840	0	590100	0	0	0	0	0	0	0	0	0	0	0	0	0	0	446270	0	0	0	0
sp|Q16880|CGT_HUMAN	sp|Q16880|CGT_HUMAN				10359000	0	0	0	0	0	0	0	0	0	0	0	0	0	0	0	0	0	0	0	0	0	0	0	0	0	0	0	0	0	0	0	0	0	0	0	0	0	0	0	0	0	0	0	0
sp|Q16891|MIC60_HUMAN	sp|Q16891|MIC60_HUMAN				131470000	50616000	1545800	3638000	7368400	0	0	0	0	0	0	0	0	2690600	0	15573000	12394000	27203000	0	5829700	0	821730	0	1390300	0	5622300	5191900	0	0	1296800	0	0	37796000	0	0	0	0	0	3918500	0	0	959400	0	4003200	1829000
sp|Q17RS7|GEN_HUMAN	sp|Q17RS7|GEN_HUMAN				0	0	0	0	0	0	0	0	0	0	0	0	0	0	0	0	0	0	0	0	0	0	0	0	0	0	0	0	0	0	0	0	0	0	0	0	0	0	0	0	0	0	0	0	0
sp|Q17RY6|LY6K_HUMAN	sp|Q17RY6|LY6K_HUMAN	+			0	0	0	0	0	0	0	0	0	0	0	0	0	0	0	0	0	0	0	0	0	0	0	0	0	0	0	0	0	0	0	0	0	0	0	0	0	0	0	0	0	0	0	0	0
sp|Q1ED39|KNOP1_HUMAN	sp|Q1ED39|KNOP1_HUMAN				50052000	83198000	4432300	29381000	40466000	0	1630100	24936000	111700000	249920000	277040000	136110000	319330000	307890000	38552000	29037000	16689000	18032000	40797000	22435000	53043000	4460000	3795700	84336000	2214200	10951000	71128000	45243000	17085000	18262000	58126000	12519000	111220000	141650000	33992000	309450000	216040000	127560000	42476000	202240000	17939000	60910000	141200000	18076000	173040000
sp|Q27J81|INF2_HUMAN	sp|Q27J81|INF2_HUMAN				0	0	0	0	0	0	762000	0	0	0	0	0	0	0	0	0	0	0	0	0	0	0	0	0	0	0	0	0	0	0	0	0	0	0	0	0	0	0	0	0	0	0	0	2572100	0
sp|Q29RF7|PDS5A_HUMAN	sp|Q29RF7|PDS5A_HUMAN				0	0	0	0	0	0	0	0	0	0	0	0	0	0	0	0	0	0	0	0	0	0	0	0	0	0	0	0	0	0	0	0	0	0	0	0	0	0	0	0	0	0	0	0	0
sp|Q2KHR3|QSER1_HUMAN	sp|Q2KHR3|QSER1_HUMAN				0	0	0	0	0	0	0	0	0	0	0	0	0	0	0	0	0	0	0	0	29627000	0	0	20873000	0	0	0	0	0	0	0	0	0	0	0	0	0	0	0	0	0	0	0	0	0
sp|Q2KHT3|CL16A_HUMAN	sp|Q2KHT3|CL16A_HUMAN				0	0	0	0	0	0	0	0	0	0	0	0	0	0	0	0	0	0	0	0	0	0	0	0	0	0	0	0	0	0	0	0	0	0	0	0	0	0	0	0	13552000	12137000	14052000	66665000	0
sp|Q2LD37|K1109_HUMAN	sp|Q2LD37|K1109_HUMAN				0	0	0	0	0	0	0	0	0	0	0	0	0	0	0	0	0	0	0	0	0	0	9176400	0	0	0	0	0	0	0	0	0	0	0	0	0	0	0	0	0	0	0	0	0	0
sp|Q2M1P5|KIF7_HUMAN	sp|Q2M1P5|KIF7_HUMAN				0	0	0	0	0	2002300	13326000	7180800	4354000	0	33768000	0	2791700	4169100	0	0	0	0	0	0	3976700	0	0	1513400	0	0	0	0	0	0	0	0	0	0	0	0	0	0	201690000	70510000	428710000	0	0	13022000	0
sp|Q2M1Z3|RHG31_HUMAN	sp|Q2M1Z3|RHG31_HUMAN				0	0	21185000	9112000	1306600	1432500	1304400	0	3955600	3190200	2869300	0	0	0	0	0	0	0	0	0	0	0	0	0	0	0	0	0	0	0	0	0	0	0	0	0	0	0	0	0	337550	0	0	0	0
sp|Q2M2I8|AAK1_HUMAN	sp|Q2M2I8|AAK1_HUMAN				0	0	0	4137400	6101500	7112600	8147600	16778000	0	0	3526600	0	0	0	8849200	4812200	6327000	0	5773600	0	0	1730300	0	0	0	0	0	0	7231400	5883900	4863900	6616800	2848400	0	0	5212800	0	0	0	3960000	1743000	0	0	14206000	0
sp|Q2M2Z5|KIZ_HUMAN	sp|Q2M2Z5|KIZ_HUMAN				0	0	0	0	0	0	0	0	0	0	0	0	0	0	0	0	0	0	0	0	0	0	0	0	0	0	0	0	0	0	0	0	0	0	0	0	0	0	0	0	355560	0	0	0	0
sp|Q2NKQ1|SGSM1_HUMAN	sp|Q2NKQ1|SGSM1_HUMAN				0	0	0	0	0	0	0	0	0	0	0	0	0	0	0	0	0	0	0	0	0	0	22828000	0	0	0	0	0	0	0	0	0	0	0	0	0	0	0	0	0	268590	0	0	0	0
sp|Q2NKX8|ERC6L_HUMAN	sp|Q2NKX8|ERC6L_HUMAN				0	0	2164600	0	10573000	13049000	19389000	23831000	0	0	0	0	0	0	12571000	3279000	0	0	11363000	13325000	23888000	8385100	20211000	75640000	156770000	34456000	0	0	14393000	4100400	0	9044900	0	0	4634900	0	0	0	0	0	6956200	0	0	41550000	0
sp|Q2NL82|TSR1_HUMAN	sp|Q2NL82|TSR1_HUMAN				0	0	0	1338700	1473100	0	0	0	0	0	0	0	0	0	0	0	0	0	0	0	0	0	0	0	0	0	0	0	0	0	0	1708000	1150500	0	0	0	0	0	0	0	0	0	0	0	0
sp|Q2PPJ7|RGPA2_HUMAN	sp|Q2PPJ7|RGPA2_HUMAN				0	0	0	0	0	0	0	0	0	0	0	0	0	0	0	0	0	0	0	0	6084300	0	0	0	0	0	0	0	5650300	0	0	5115300	0	0	0	0	0	0	0	0	0	0	0	0	0
sp|Q2TAC6|KIF19_HUMAN	sp|Q2TAC6|KIF19_HUMAN				0	0	0	0	0	0	0	0	0	0	0	0	0	0	0	0	0	0	0	0	0	0	0	0	0	0	0	0	0	0	0	0	0	0	0	0	0	0	0	0	0	0	0	0	0
sp|Q2TAL8|QRIC1_HUMAN	sp|Q2TAL8|QRIC1_HUMAN				0	0	0	0	0	0	0	661340	0	0	0	0	0	0	0	0	0	0	0	0	575010	0	0	0	0	0	0	0	251800	0	0	0	0	0	0	0	0	0	0	0	0	0	0	0	0
sp|Q2TAZ0|ATG2A_HUMAN	sp|Q2TAZ0|ATG2A_HUMAN				0	0	0	0	0	0	0	0	0	0	0	0	0	0	0	0	0	0	0	0	0	0	0	0	0	0	0	0	740210	0	0	0	0	0	0	0	0	0	0	0	0	0	0	0	0
sp|Q2TB10|ZN800_HUMAN	sp|Q2TB10|ZN800_HUMAN				0	0	0	0	0	0	0	0	0	0	0	0	0	0	0	0	0	0	0	0	0	0	0	0	0	0	0	0	0	0	0	0	0	0	0	0	0	0	0	0	0	0	0	0	0
sp|Q2TBE0|C19L2_HUMAN	sp|Q2TBE0|C19L2_HUMAN				0	0	0	716310	3722300	1500500	0	0	0	3238600	0	0	2656100	4438300	0	878610	0	1765400	2669000	908800	0	0	0	0	0	0	0	0	1656100	1567900	0	3428100	2582800	0	0	0	0	0	0	0	2025000	0	1558800	348410	0
sp|Q2Y0W8|S4A8_HUMAN	sp|Q2Y0W8|S4A8_HUMAN	+			0	0	0	0	0	0	0	0	0	0	0	0	0	0	0	0	0	0	0	0	0	0	0	0	0	0	0	0	0	0	0	0	0	0	0	0	0	0	0	0	4554600	0	0	0	0
sp|Q30KQ8|DB112_HUMAN	sp|Q30KQ8|DB112_HUMAN	+			0	0	0	0	0	0	0	0	0	0	0	0	0	0	0	0	0	0	0	0	0	0	0	0	0	0	0	0	0	0	0	0	0	0	0	0	0	0	0	0	0	0	0	0	0
sp|Q32MZ4|LRRF1_HUMAN	sp|Q32MZ4|LRRF1_HUMAN				3795200	0	0	0	4614200	0	0	0	0	0	0	0	0	0	3937900	1114600	0	0	3541000	0	12557000	0	9445600	12860000	0	0	0	0	0	0	0	0	0	0	8641200	0	0	0	0	0	3694400	0	0	2040500	0
sp|Q32NB8|PGPS1_HUMAN	sp|Q32NB8|PGPS1_HUMAN				0	0	0	0	0	0	0	0	0	0	0	0	0	0	0	0	0	0	0	0	0	0	0	0	0	0	0	0	0	0	0	0	0	0	0	0	0	0	0	0	1810000	0	0	0	0
sp|Q3B7T1|EDRF1_HUMAN	sp|Q3B7T1|EDRF1_HUMAN				0	0	0	0	0	0	0	0	0	0	0	0	0	0	0	0	0	0	0	0	0	0	0	0	0	0	0	0	0	0	0	0	0	0	0	0	0	0	0	0	0	0	0	0	0
sp|Q3I5F7|ACOT6_HUMAN	sp|Q3I5F7|ACOT6_HUMAN	+			0	0	0	0	0	0	0	0	0	0	0	0	0	0	0	0	0	0	0	0	0	0	0	0	0	0	0	0	0	0	0	0	0	0	0	0	0	0	0	0	0	0	0	0	0
sp|Q3L8U1|CHD9_HUMAN	sp|Q3L8U1|CHD9_HUMAN				0	0	0	0	0	0	0	0	0	0	0	0	0	0	0	0	0	0	0	0	0	0	0	0	0	0	0	0	0	0	0	0	0	0	0	0	0	0	0	0	0	0	0	0	0
sp|Q3LI61|KR202_HUMAN	sp|Q3LI61|KR202_HUMAN				0	0	0	0	0	0	0	0	0	0	0	0	0	0	0	0	0	0	0	0	0	0	0	0	0	0	0	0	0	0	0	0	0	0	0	0	0	0	0	0	0	0	0	0	0
sp|Q3LI83|KR241_HUMAN	sp|Q3LI83|KR241_HUMAN				0	0	0	0	0	0	0	0	0	0	0	0	0	0	0	0	0	0	0	0	0	0	0	0	0	0	0	0	0	0	0	0	0	0	0	0	0	0	0	0	0	0	0	0	0
sp|Q3MII6|TBC25_HUMAN	sp|Q3MII6|TBC25_HUMAN				0	0	0	0	0	0	0	0	0	0	0	0	0	0	0	0	0	0	0	0	0	0	0	0	0	0	0	0	0	0	0	0	0	0	0	0	0	0	95487000	15060000	89205000	31045000	11227000	35967000	0
sp|Q3SXY8|AR13B_HUMAN	sp|Q3SXY8|AR13B_HUMAN				0	0	0	0	0	0	0	0	0	0	0	0	0	0	0	0	0	0	0	0	0	0	0	0	0	0	0	0	0	0	0	0	0	0	0	0	0	0	0	0	0	0	0	0	0
sp|Q3SY69|AL1L2_HUMAN	sp|Q3SY69|AL1L2_HUMAN				0	0	0	0	0	0	0	0	0	2723100	0	0	0	4033700	0	0	3943100	0	0	0	18390000	1230700	1613600	89874000	38983000	65464000	0	0	0	0	0	0	0	0	0	0	0	0	0	0	1173800	0	0	0	0
sp|Q3SYG4|PTHB1_HUMAN	sp|Q3SYG4|PTHB1_HUMAN	+			0	0	0	0	0	0	0	3660900	20221000	0	0	0	0	0	0	0	0	13805000	0	0	0	0	0	0	0	0	14609000	0	0	0	0	0	0	0	0	0	0	0	0	0	0	0	0	0	0
sp|Q3T8J9|GON4L_HUMAN	sp|Q3T8J9|GON4L_HUMAN				0	0	0	0	0	0	0	0	0	0	0	0	0	0	0	0	0	0	0	0	0	0	0	0	0	0	0	0	0	0	0	0	0	0	0	0	0	0	0	0	0	0	0	0	0
sp|Q3V6T2|GRDN_HUMAN	sp|Q3V6T2|GRDN_HUMAN				0	0	6523500	0	0	30957000	20878000	6870500	31768000	59861000	43294000	27233000	9865200	4867100	26972000	8689100	17142000	9231900	26556000	25408000	30110000	3136400	21974000	6049600	0	0	3212200	0	34512000	0	0	13257000	0	0	9443200	0	0	1951600	89395000	8820600	19382000	20276000	2643900	7509200	0
sp|Q3YEC7|RABL6_HUMAN	sp|Q3YEC7|RABL6_HUMAN				0	33979000	26374000	27578000	12069000	2008500	0	4693700	0	40931000	8477500	8117900	64028000	71326000	19629000	71240000	3277700	124890000	6444400	6196600	14685000	2092300	1790100	18520000	5100200	5204400	0	0	19966000	3614800	0	10377000	349540000	365440000	11392000	19621000	267870000	19046000	183580000	35915000	5456900	193930000	48410000	27868000	121860000
sp|Q3ZAQ7|VMA21_HUMAN	sp|Q3ZAQ7|VMA21_HUMAN				0	8508400	0	0	0	0	0	0	0	0	0	0	0	0	0	0	2080300	0	0	0	0	0	0	0	0	0	0	0	0	0	0	0	0	0	0	0	0	0	0	0	0	0	0	0	0
sp|Q3ZCM7|TBB8_HUMAN	sp|Q3ZCM7|TBB8_HUMAN				0	0	0	13698000	0	0	8963800	0	5933300	0	0	0	0	0	9053900	16046000	28296000	11785000	11206000	24896000	15444000	7727200	13141000	4156700	6500500	0	0	0	0	0	0	3821400	0	0	0	0	0	0	0	0	18616000	0	0	0	0
sp|Q3ZCQ8|TIM50_HUMAN	sp|Q3ZCQ8|TIM50_HUMAN				5500100	7912300	0	0	3137800	4256500	0	3780400	0	0	3851400	5651300	12433000	16556000	3300500	0	12161000	0	0	0	7413000	0	8044000	1558800	0	0	0	0	0	0	0	0	17778000	17810000	0	9908800	7602100	0	4437300	4540500	8939700	15902000	2450200	0	26203000
sp|Q49AG3|ZBED5_HUMAN	sp|Q49AG3|ZBED5_HUMAN				0	0	0	0	0	0	0	0	0	0	0	0	0	0	0	0	0	0	0	0	0	0	0	44921	0	0	0	0	0	0	0	0	0	0	0	0	0	0	0	0	0	0	0	0	0
sp|Q4G0F5|VP26B_HUMAN	sp|Q4G0F5|VP26B_HUMAN				0	0	0	0	0	0	0	0	0	0	0	0	0	0	0	0	0	0	0	0	0	0	0	0	0	0	0	0	0	0	0	0	0	0	0	0	0	0	0	0	0	0	0	0	0
sp|Q4KMP7|TB10B_HUMAN	sp|Q4KMP7|TB10B_HUMAN				0	14834000	0	1861500	0	0	0	3789300	0	11604000	0	0	8370900	13584000	2905600	6115400	2167600	4177800	7662900	6080600	6393000	0	0	0	0	0	0	0	5314900	0	0	20793000	49765000	12417000	0	0	7864200	0	35826000	0	0	32360000	0	4349800	5590200
sp|Q4KMZ1|IQCC_HUMAN	sp|Q4KMZ1|IQCC_HUMAN				0	0	0	0	0	0	0	0	171510000	0	263340000	450610000	0	1379500000	0	0	0	0	0	0	0	0	0	0	0	0	0	0	0	0	0	0	0	0	0	0	0	0	0	0	0	0	0	0	0
sp|Q4KWH8|PLCH1_HUMAN;sp|O75038|PLCH2_HUMAN	sp|Q4KWH8|PLCH1_HUMAN				0	0	0	3737500	0	0	2291600	0	0	0	0	0	0	0	1565900	2161600	3132200	3304000	0	0	1427300	0	0	5130500	0	0	0	0	1433800	0	0	0	0	0	0	0	0	0	0	0	0	0	0	1414100	0
sp|Q4U2R6|RM51_HUMAN	sp|Q4U2R6|RM51_HUMAN				0	0	0	0	0	0	0	0	0	0	0	0	0	0	0	0	0	0	0	0	0	0	0	0	0	0	0	0	0	0	0	0	0	0	4739200	0	0	0	0	0	0	0	0	0	0
sp|Q4V328|GRAP1_HUMAN	sp|Q4V328|GRAP1_HUMAN				0	0	0	0	0	0	0	0	0	0	0	0	0	0	0	0	0	0	0	0	199480000	462800000	261650000	0	0	0	0	0	0	0	0	0	0	0	0	0	0	0	4404700	0	58143000	0	0	0	0
sp|Q4VC31|CCD58_HUMAN	sp|Q4VC31|CCD58_HUMAN				0	0	0	0	0	0	0	0	0	0	0	0	0	0	0	0	1205300	0	0	0	0	0	0	0	0	0	0	0	0	0	0	0	0	0	0	0	0	0	0	0	0	0	0	0	0
sp|Q4VCS5|AMOT_HUMAN	sp|Q4VCS5|AMOT_HUMAN				0	0	216910000	120500000	277260000	494280000	421650000	397560000	130340000	130140000	209580000	89659000	158510000	132600000	136330000	157560000	79771000	95899000	62745000	120410000	190310000	100560000	89577000	130180000	49289000	107230000	49923000	0	177880000	89117000	0	145570000	0	0	22085000	0	0	0	0	72179000	148430000	0	13513000	59062000	0
sp|Q52LG2|KR132_HUMAN	sp|Q52LG2|KR132_HUMAN				0	0	0	0	0	0	0	0	0	0	0	0	0	0	0	0	0	0	0	0	0	0	0	0	0	0	0	0	0	0	0	0	0	0	0	0	0	0	0	0	0	0	0	0	0
sp|Q52LW3|RHG29_HUMAN	sp|Q52LW3|RHG29_HUMAN				0	0	0	0	0	0	0	0	0	0	0	0	0	0	0	0	0	0	0	0	0	0	0	0	0	0	0	0	0	0	0	0	0	0	0	0	0	0	0	0	0	0	0	0	0
sp|Q53EL6|PDCD4_HUMAN	sp|Q53EL6|PDCD4_HUMAN				0	0	0	0	0	0	0	0	0	0	0	0	0	0	0	0	0	0	0	0	0	0	0	0	0	0	0	0	0	0	0	0	0	0	0	0	0	0	0	0	0	0	0	0	0
sp|Q53EP0|FND3B_HUMAN	sp|Q53EP0|FND3B_HUMAN				0	0	0	0	0	0	0	0	0	0	0	0	0	0	0	0	0	0	0	0	0	0	0	0	1341900	0	0	0	0	0	0	0	0	0	0	0	0	0	0	0	0	0	0	0	0
sp|Q53ET0|CRTC2_HUMAN	sp|Q53ET0|CRTC2_HUMAN				0	0	0	0	0	0	0	0	0	0	0	0	0	0	0	0	0	0	0	0	0	0	0	0	0	0	0	0	0	0	0	0	0	0	0	0	0	0	0	0	0	0	0	0	0
sp|Q53EU6|GPAT3_HUMAN	sp|Q53EU6|GPAT3_HUMAN				0	0	0	0	0	0	0	0	0	0	0	0	0	2978400	6975500	17305000	0	10952000	0	0	0	0	0	14667000	0	0	0	0	0	0	0	0	0	0	0	0	0	0	0	0	0	0	0	0	0
sp|Q53EZ4|CEP55_HUMAN	sp|Q53EZ4|CEP55_HUMAN				0	0	0	0	0	0	0	0	55119000	0	0	0	2514100	0	0	0	0	0	0	0	0	0	0	0	0	0	0	0	0	0	0	0	0	0	0	0	0	0	5532400	0	0	0	0	0	0
sp|Q53F19|NCBP3_HUMAN	sp|Q53F19|NCBP3_HUMAN				0	0	0	0	0	0	0	0	0	0	0	0	0	0	0	0	0	0	0	0	0	0	0	0	0	0	0	0	0	0	0	0	0	0	0	0	0	0	0	0	0	0	0	0	0
sp|Q53GG5|PDLI3_HUMAN	sp|Q53GG5|PDLI3_HUMAN				0	0	0	0	0	0	864740	0	0	0	0	0	0	0	0	0	0	0	0	372560	0	0	0	0	0	0	0	0	0	0	0	0	0	0	0	0	0	0	0	0	0	0	0	0	0
sp|Q53GQ0|DHB12_HUMAN	sp|Q53GQ0|DHB12_HUMAN				0	0	0	0	779980	2450700	0	976820	0	0	0	0	0	0	0	0	0	0	0	0	0	0	0	441780	0	0	0	0	0	0	0	0	0	0	0	0	0	0	0	0	0	0	0	0	0
sp|Q53H12|AGK_HUMAN	sp|Q53H12|AGK_HUMAN				17104000	41603000	0	7096300	1997500	2744300	10322000	0	0	0	774570	0	4065900	14282000	0	0	13316000	0	0	0	2640100	0	1986900	2560300	0	5175300	71619000	0	0	11418000	0	10039000	4017000	0	0	5371700	0	0	2838300	3346600	12254000	18540000	516510	9741700	23466000
sp|Q53SF7|COBL1_HUMAN	sp|Q53SF7|COBL1_HUMAN				0	0	0	0	0	0	0	0	0	0	0	0	0	0	0	697890	0	0	0	0	0	0	0	0	0	0	0	0	0	0	0	0	0	0	0	0	0	0	0	0	0	0	0	0	0
sp|Q53T59|H1BP3_HUMAN	sp|Q53T59|H1BP3_HUMAN				0	0	0	0	0	0	0	0	0	0	0	0	0	0	0	0	0	0	0	0	0	0	0	367440	0	0	0	1043700	0	0	1149700	0	0	0	1214500	0	0	0	0	0	0	0	0	0	0
sp|Q53T94|TAF1B_HUMAN	sp|Q53T94|TAF1B_HUMAN				0	0	0	0	0	0	0	0	0	0	0	0	0	0	0	0	0	0	0	0	0	0	0	0	0	0	0	0	0	0	0	0	0	0	0	0	0	0	0	0	0	0	0	0	0
sp|Q562E7|WDR81_HUMAN	sp|Q562E7|WDR81_HUMAN				0	0	0	0	0	0	0	0	0	0	0	0	0	0	0	0	0	0	0	0	0	0	0	0	0	0	0	0	0	0	0	0	0	0	0	0	0	0	0	0	0	0	0	0	0
sp|Q562F6|SGO2_HUMAN	sp|Q562F6|SGO2_HUMAN				0	0	2277400	6463900	9791200	0	5622000	0	0	43262000	25575000	0	27056000	18192000	1878700	0	0	0	2300800	0	34808000	0	0	78307000	0	5954000	0	0	14920000	0	0	60025000	0	0	0	0	0	2572400	0	98931000	0	0	27062000	16353000	0
sp|Q562R1|ACTBL_HUMAN	sp|Q562R1|ACTBL_HUMAN				0	25569000	0	0	0	0	0	0	0	0	0	0	0	38091000	0	0	0	0	0	0	0	0	11499000	27310000	0	0	0	0	39461000	0	0	0	0	0	0	0	0	0	0	0	0	0	0	18295000	0
sp|Q587I9|SFT2C_HUMAN	sp|Q587I9|SFT2C_HUMAN				0	0	0	0	0	0	0	0	0	0	0	0	0	0	0	0	0	0	0	0	0	0	0	0	0	0	0	0	0	0	0	0	0	0	0	0	0	0	0	0	0	0	0	0	0
sp|Q58A45|PAN3_HUMAN	sp|Q58A45|PAN3_HUMAN				0	0	0	0	0	0	0	0	0	0	0	0	0	0	0	0	0	0	0	0	0	0	0	0	0	0	0	0	0	0	0	0	0	0	0	0	0	0	0	0	0	0	0	0	0
sp|Q58EX2|SDK2_HUMAN	sp|Q58EX2|SDK2_HUMAN				0	0	0	0	0	0	0	0	0	0	0	0	0	0	0	0	4236600	0	0	0	0	0	0	0	0	0	0	0	0	0	0	0	0	0	0	0	0	0	0	0	0	0	0	0	0
sp|Q58EX7|PKHG4_HUMAN	sp|Q58EX7|PKHG4_HUMAN				0	0	7135500	41279000	5313000	0	0	0	0	30428000	22144000	0	0	5303900	0	0	0	2937800	0	0	1040300	0	0	700270	0	0	0	0	0	0	0	0	0	0	0	0	0	0	0	2753500	0	0	0	3111000	0
sp|Q58FF6|H90B4_HUMAN	sp|Q58FF6|H90B4_HUMAN				0	0	0	0	0	0	0	0	0	0	0	0	0	0	0	0	0	0	0	0	0	3946800	0	0	0	0	0	0	0	0	0	0	0	0	0	0	0	0	0	0	0	0	0	0	0
sp|Q58FF8|H90B2_HUMAN	sp|Q58FF8|H90B2_HUMAN				0	0	6598100	0	0	0	15537000	10569000	0	0	0	0	0	0	3494300	15193000	2798900	2791000	8720400	8596300	13048000	29540000	9756100	1379900	59379000	0	0	0	1030100	0	0	0	0	0	0	0	0	0	0	0	0	0	0	0	0
sp|Q5C9Z4|NOM1_HUMAN	sp|Q5C9Z4|NOM1_HUMAN				17916000	9075600	51695000	216260000	78742000	8222900	101730000	39427000	0	80695000	0	21465000	95436000	59830000	29590000	134680000	46717000	198620000	23059000	39741000	126360000	24380000	72578000	179720000	975690	157030000	77315000	0	110840000	2901700	0	248760000	103950000	100700000	45075000	109100000	80990000	31250000	102930000	23518000	24902000	109500000	4712800	27251000	121570000
sp|Q5EBL4|RIPL1_HUMAN;sp|Q969X0|RIPL2_HUMAN	sp|Q5EBL4|RIPL1_HUMAN				0	0	0	0	0	0	0	0	0	0	0	0	0	0	0	0	0	0	0	0	0	0	0	0	0	0	0	0	0	0	0	0	0	0	0	0	0	0	0	0	0	0	0	0	0
sp|Q5F1R6|DJC21_HUMAN	sp|Q5F1R6|DJC21_HUMAN				0	0	0	0	0	0	0	0	0	0	0	0	0	0	0	0	0	0	0	0	0	0	0	0	0	0	0	0	0	0	0	0	0	0	0	0	0	0	0	0	0	0	0	0	0
sp|Q5FBB7|SGO1_HUMAN	sp|Q5FBB7|SGO1_HUMAN				0	0	0	0	0	0	0	0	0	0	0	0	0	0	0	0	0	0	0	0	0	0	0	0	0	0	0	0	0	0	0	0	0	0	0	0	0	6949000	0	4596600	0	0	0	0	0
sp|Q5H9F3|BCORL_HUMAN	sp|Q5H9F3|BCORL_HUMAN				0	0	0	0	0	0	0	0	0	0	0	0	0	0	0	0	0	0	0	0	0	0	0	0	0	0	0	0	0	0	0	0	0	0	0	0	0	0	0	0	0	0	0	0	0
sp|Q5H9R7|PP6R3_HUMAN	sp|Q5H9R7|PP6R3_HUMAN				0	0	0	0	0	0	0	0	0	0	0	0	0	0	0	2090700	0	0	5283400	0	6351900	7001300	0	5240600	0	0	0	0	0	0	0	0	0	0	0	0	0	0	0	0	0	0	0	0	0
sp|Q5H9U9|DDX6L_HUMAN	sp|Q5H9U9|DDX6L_HUMAN	+			0	0	0	0	0	0	0	0	0	0	0	0	0	0	0	0	0	0	0	0	0	0	0	0	0	0	0	0	0	0	0	0	0	0	0	0	0	0	0	0	0	0	0	0	0
sp|Q5HYI7|MTX3_HUMAN	sp|Q5HYI7|MTX3_HUMAN				11341000	0	10229000	9686500	22504000	25929000	16361000	32665000	8263100	11703000	14392000	24099000	16397000	8258700	41419000	3066000	14255000	9700300	35873000	35515000	6765100	0	85551000	21650000	12618000	22603000	26257000	63567000	20437000	60855000	55003000	32042000	8729400	0	100780000	0	0	47875000	5915200	50867000	70879000	10661000	55085000	39212000	18720000
sp|Q5HYI8|RABL3_HUMAN	sp|Q5HYI8|RABL3_HUMAN				21601000	16854000	23300000	9081700	13121000	27253000	12184000	26887000	13957000	4341200	4459900	11693000	0	0	27688000	6854000	17182000	0	17509000	19690000	10949000	9481100	48068000	13171000	10149000	26085000	0	23282000	19689000	8317600	691700000	4401500	5939300	0	50877000	0	0	0	3621700	0	9760700	12267000	14334000	14180000	0
sp|Q5HYJ3|FA76B_HUMAN	sp|Q5HYJ3|FA76B_HUMAN				0	0	0	0	0	0	0	0	0	0	0	0	0	0	0	0	0	0	0	0	0	0	0	0	0	0	0	0	0	0	0	0	0	0	0	0	0	2299500	0	0	0	0	0	0	0
sp|Q5HYK7|SH319_HUMAN	sp|Q5HYK7|SH319_HUMAN				0	0	9249800	2128800	2218600	22870000	6676800	15395000	0	0	0	0	0	0	6318400	1783700	0	0	3507000	4947700	0	0	0	658520	0	0	0	0	2439900	1846000	0	0	0	0	0	0	0	0	0	0	1432600	0	0	0	0
sp|Q5HYW2|NHSL2_HUMAN	sp|Q5HYW2|NHSL2_HUMAN				0	0	0	0	0	0	0	0	0	0	0	0	0	0	0	0	0	0	0	0	0	0	0	0	0	0	0	0	0	0	0	0	0	0	0	0	0	0	0	0	0	0	0	0	0
sp|Q5JPH6|SYEM_HUMAN	sp|Q5JPH6|SYEM_HUMAN				0	0	0	0	0	0	0	0	0	0	0	0	0	0	0	0	0	0	0	0	0	0	0	0	0	0	0	0	0	0	0	0	0	0	0	0	0	0	0	0	0	0	0	0	0
sp|Q5JQC9|AKAP4_HUMAN	sp|Q5JQC9|AKAP4_HUMAN	+			0	0	0	0	0	0	0	0	0	0	0	0	0	0	0	0	0	0	0	0	0	0	0	0	0	0	0	0	0	0	0	0	0	0	0	0	0	0	0	0	0	0	0	0	0
sp|Q5JRA6|MIA3_HUMAN	sp|Q5JRA6|MIA3_HUMAN				24471000	0	5182800	0	0	21799000	17471000	17875000	3918400	49920000	3893900	0	0	73186000	16644000	43605000	27102000	32333000	0	22140000	2528200	0	1435400	14736000	9713100	13818000	0	0	23071000	0	0	17574000	0	0	15008000	0	0	0	0	30555000	0	0	18620000	0	0
sp|Q5JRX3|PREP_HUMAN	sp|Q5JRX3|PREP_HUMAN				0	0	0	0	0	0	0	0	0	0	0	0	0	0	0	0	0	0	0	0	0	0	0	0	0	0	0	0	0	0	0	0	0	0	0	0	0	0	0	0	0	0	0	0	0
sp|Q5JSH3|WDR44_HUMAN	sp|Q5JSH3|WDR44_HUMAN				0	30209000	5018800	0	22772000	41363000	6156800	27961000	0	0	0	2117600	0	0	165530000	14626000	57418000	0	11197000	43436000	33291000	688540	5402600	0	0	0	577640000	351390000	767060000	62979000	18032000	43909000	0	0	1082800	0	0	0	0	0	6680900	0	0	9356500	0
sp|Q5JSL3|DOC11_HUMAN	sp|Q5JSL3|DOC11_HUMAN				0	0	4147600	37691000	7536700	1912600000	2513600000	847250000	10775000	474410	4363600	2914400	0	0	0	0	0	0	0	0	125570	0	0	132940	0	0	0	0	0	0	0	0	0	0	0	0	0	0	0	0	0	0	0	0	0
sp|Q5JSZ5|PRC2B_HUMAN	sp|Q5JSZ5|PRC2B_HUMAN				0	0	0	0	0	0	0	0	0	0	0	0	0	0	0	0	0	0	0	0	0	0	0	0	0	0	0	0	0	0	0	0	0	0	0	0	0	0	0	0	0	0	0	0	0
sp|Q5JTC6|AMER1_HUMAN	sp|Q5JTC6|AMER1_HUMAN				0	0	751390	478280	0	761850	817390	0	0	1060500	0	0	0	0	0	0	0	0	0	0	0	0	0	0	0	0	0	0	1055700	0	0	1906400	0	0	0	0	0	0	0	0	0	0	0	0	0
sp|Q5JTD0|TJAP1_HUMAN	sp|Q5JTD0|TJAP1_HUMAN				0	0	0	0	0	0	0	0	0	0	0	0	0	0	0	0	0	0	0	0	0	0	0	0	0	0	0	0	0	0	0	0	0	0	0	0	0	0	0	5970600	0	0	0	0	0
sp|Q5JTH9|RRP12_HUMAN;sp|O60306|AQR_HUMAN	sp|Q5JTH9|RRP12_HUMAN				383770000	270840000	969320000	2573900000	1723500000	680320000	1216500000	803340000	508560000	697660000	664720000	465590000	1117400000	953980000	729640000	1382700000	601080000	1728200000	1099400000	648460000	1718100000	323230000	380880000	1512300000	448080000	1620600000	723150000	116070000	2246600000	368970000	270000000	2029900000	1969100000	1505200000	452600000	2409200000	1399900000	363560000	1328600000	942620000	758290000	1837300000	540960000	1140100000	1966600000
sp|Q5JTV8|TOIP1_HUMAN	sp|Q5JTV8|TOIP1_HUMAN				106460000	154280000	83966000	49764000	78230000	124790000	76115000	145110000	111020000	31839000	41633000	98337000	35091000	27173000	237000000	85197000	151950000	34722000	97923000	109670000	68169000	56387000	68312000	64448000	28958000	55770000	51270000	28787000	114520000	25575000	22062000	31859000	16075000	9167500	97064000	15192000	8831800	5240800	14117000	0	46133000	29951000	9436100	66887000	10938000
sp|Q5JTW2|CEP78_HUMAN	sp|Q5JTW2|CEP78_HUMAN				0	0	22700000	56419000	6196600	0	23002000	0	0	43981000	16730000	0	33947000	48479000	4084100	43885000	2794100	55427000	0	9690900	7288900	47367000	0	25074000	3098600	23846000	1724800	0	4498200	0	0	3821200	26428000	0	237010	30572000	17408000	8354200	46422000	17465000	0	24156000	21165000	14253000	3845800
sp|Q5JTZ9|SYAM_HUMAN	sp|Q5JTZ9|SYAM_HUMAN				0	0	0	0	0	0	0	0	0	0	0	0	0	0	0	0	0	0	0	0	0	0	0	0	0	0	0	0	355750	0	0	0	0	0	0	0	0	0	0	0	0	0	0	0	0
sp|Q5JU85|IQEC2_HUMAN	sp|Q5JU85|IQEC2_HUMAN	+			0	0	0	0	0	0	0	0	0	0	0	0	0	0	0	0	0	0	0	0	0	0	0	0	0	0	0	0	0	0	0	0	0	0	0	0	0	0	0	0	0	13290000	0	0	0
sp|Q5JW98|FA26D_HUMAN	sp|Q5JW98|FA26D_HUMAN				0	0	0	0	0	0	0	0	0	0	0	0	0	0	0	0	0	0	0	0	0	0	0	0	0	0	0	0	0	0	0	0	0	0	0	0	0	0	0	0	0	0	0	0	0
sp|Q5M775|CYTSB_HUMAN	sp|Q5M775|CYTSB_HUMAN				0	0	0	0	0	0	0	0	0	0	0	0	0	0	0	0	0	0	0	0	3029600	0	0	0	0	0	0	0	0	0	0	0	0	0	0	0	0	0	0	0	0	0	0	0	0
sp|Q5NE16|CATL3_HUMAN	sp|Q5NE16|CATL3_HUMAN	+			0	0	0	0	0	0	0	0	0	0	0	0	0	0	0	0	0	0	0	0	0	0	0	0	0	0	0	0	0	0	0	0	0	0	0	0	0	0	0	0	0	0	0	0	0
sp|Q5PRF9|SMAG2_HUMAN	sp|Q5PRF9|SMAG2_HUMAN				0	0	0	0	0	0	0	0	0	0	0	0	0	0	0	0	0	0	0	0	0	0	0	0	0	0	0	0	0	0	0	0	0	0	0	0	0	0	0	0	0	0	0	0	0
sp|Q5QJ74|TBCEL_HUMAN	sp|Q5QJ74|TBCEL_HUMAN				0	0	0	0	0	0	0	0	0	0	0	0	0	0	0	0	0	0	0	0	0	0	0	0	0	0	0	0	0	0	0	0	0	0	0	0	0	0	0	0	0	0	0	0	0
sp|Q5QJE6|TDIF2_HUMAN	sp|Q5QJE6|TDIF2_HUMAN				0	0	0	0	0	0	0	0	0	0	0	0	0	0	0	0	0	0	0	0	0	0	0	0	0	0	0	0	0	0	0	0	0	0	0	0	0	0	0	0	0	0	0	0	0
sp|Q5R372|RBG1L_HUMAN	sp|Q5R372|RBG1L_HUMAN				0	0	0	0	0	0	0	0	0	0	0	0	0	0	506720	0	974660	0	0	0	182630000	301880000	236060000	0	0	0	624250000	455920000	661450000	0	0	2805900	0	0	0	0	0	0	0	0	14973000	0	0	909520	0
sp|Q5SQN1|SNP47_HUMAN	sp|Q5SQN1|SNP47_HUMAN				0	0	0	6258300	0	6141300	6176700	2815400	4701600	0	3471100	0	6658800	7876800	3234000	3132300	0	10522000	8932400	0	411800	0	0	0	0	0	14473000	4455500	6931900	20974000	3136200	9212500	0	0	12969000	0	0	0	34916000	9900300	127690000	10647000	23249000	25219000	0
sp|Q5SRE5|NU188_HUMAN	sp|Q5SRE5|NU188_HUMAN				0	0	0	0	0	0	0	0	0	0	0	0	0	0	0	0	0	0	0	0	0	0	0	0	0	0	0	0	0	0	0	0	0	0	0	0	0	0	0	0	0	0	0	0	0
sp|Q5SVZ6|ZMYM1_HUMAN	sp|Q5SVZ6|ZMYM1_HUMAN				0	0	125000000	174250000	67474000	75647000	73057000	50660000	0	95853000	1428900	45277000	102360000	119330000	35481000	83240000	48744000	98199000	72776000	89745000	119620000	28898000	44416000	117830000	57442000	66757000	11765000	0	178670000	0	0	297760000	63114000	26173000	30958000	0	42136000	26086000	66947000	106210000	131290000	106500000	42574000	125310000	5932600
sp|Q5SW79|CE170_HUMAN;sp|Q96L14|C170L_HUMAN;sp|Q00G26|PLIN5_HUMAN	sp|Q5SW79|CE170_HUMAN				0	0	22800000	6914100	2742600	56777000	131390000	27227000	0	27338000	8849400	0	10736000	10198000	45069000	54496000	35408000	44427000	9976900	64662000	104410000	52556000	204210000	158110000	100450000	148030000	6613600	0	86411000	27281000	0	10112000	0	0	43525000	0	0	0	385590	0	26792000	0	5475900	113480000	0
sp|Q5SWA1|PR15B_HUMAN	sp|Q5SWA1|PR15B_HUMAN				0	0	0	0	0	0	0	0	0	0	0	0	0	0	0	0	0	0	0	0	0	0	0	0	0	0	0	0	0	0	0	0	0	0	0	0	0	0	0	0	0	0	0	0	0
sp|Q5SXM2|SNPC4_HUMAN	sp|Q5SXM2|SNPC4_HUMAN				0	0	0	0	0	0	0	0	0	0	0	0	0	0	0	0	0	0	0	0	0	0	0	0	0	0	0	0	0	0	0	0	0	0	0	0	0	0	0	0	0	0	0	0	0
sp|Q5SY16|NOL9_HUMAN	sp|Q5SY16|NOL9_HUMAN				0	0	4028600	6426500	0	0	0	0	0	3527900	0	0	0	0	0	0	0	0	0	0	0	0	0	0	0	0	0	0	0	0	0	0	4878000	0	0	6632800	0	0	0	0	0	0	0	2834300	0
sp|Q5SYE7|NHSL1_HUMAN	sp|Q5SYE7|NHSL1_HUMAN				0	0	0	0	0	0	0	0	27790000	188220000	178920000	0	0	0	0	0	0	0	0	0	2392300	0	0	964380	0	0	0	0	0	0	0	0	0	0	0	0	0	0	0	0	0	0	0	0	0
sp|Q5SZL2|CE85L_HUMAN	sp|Q5SZL2|CE85L_HUMAN	+			0	0	0	0	0	0	0	0	0	0	0	0	0	0	0	0	0	0	0	0	0	0	0	0	0	0	0	0	0	0	0	0	0	0	0	0	0	0	0	0	0	0	0	0	0
sp|Q5T160|SYRM_HUMAN	sp|Q5T160|SYRM_HUMAN				0	0	0	0	0	0	0	0	0	0	0	0	0	0	0	0	0	0	0	0	0	0	0	62660	0	415500	0	0	0	0	0	0	0	0	0	0	0	0	0	0	0	0	0	0	0
sp|Q5T280|CI114_HUMAN	sp|Q5T280|CI114_HUMAN				0	0	0	0	0	0	0	0	0	0	2198600	0	13997000	22570000	0	0	0	0	0	0	5598500	0	0	0	0	0	0	0	0	0	0	0	5481700	5226400	0	3571300	4347100	4745100	0	16657000	0	2941400	20864000	0	0
sp|Q5T3I0|GPTC4_HUMAN	sp|Q5T3I0|GPTC4_HUMAN				12582000	18654000	59682000	133560000	13721000	21358000	49742000	43920000	98579000	150030000	180000000	85140000	160660000	276980000	46277000	86180000	6503700	56621000	78371000	9643300	27790000	7114200	55440000	103460000	12390000	61566000	67836000	0	60050000	0	0	89673000	200730000	139250000	31350000	223820000	113720000	102400000	110190000	201000000	54289000	67535000	120810000	23338000	262810000
sp|Q5T3J3|LRIF1_HUMAN	sp|Q5T3J3|LRIF1_HUMAN				0	0	0	0	0	0	0	0	0	0	0	0	0	0	0	0	0	0	0	0	0	0	0	0	0	0	0	0	0	0	0	0	0	0	0	0	0	0	0	0	0	0	0	0	0
sp|Q5T481|RBM20_HUMAN	sp|Q5T481|RBM20_HUMAN				0	0	0	0	0	0	0	0	0	0	0	0	0	0	0	0	0	0	0	0	0	0	0	0	0	0	0	0	0	0	0	0	0	0	0	0	0	0	0	0	4638600	0	0	5913300	0
sp|Q5T4S7|UBR4_HUMAN	sp|Q5T4S7|UBR4_HUMAN				0	0	0	0	0	0	0	0	0	0	0	0	0	0	0	0	0	0	0	0	0	0	0	0	0	0	0	0	0	0	0	0	0	0	0	0	0	0	0	0	0	0	0	0	0
sp|Q5T5U3|RHG21_HUMAN	sp|Q5T5U3|RHG21_HUMAN				0	0	0	0	0	27426000	12949000	2790400	0	0	0	0	0	0	0	978090	3505300	0	0	0	381700	0	1479600	0	0	0	0	0	1434200	0	0	1211200	0	0	0	0	0	0	0	0	1989900	0	0	1114200	0
sp|Q5T5Y3|CAMP1_HUMAN	sp|Q5T5Y3|CAMP1_HUMAN				0	0	0	0	0	0	4448500	0	0	0	0	0	0	0	0	0	0	0	0	0	3052300	0	5679400	4416400	0	0	0	0	2880300	0	0	0	0	0	2422100	0	0	0	0	0	0	0	0	11940000	0
sp|Q5T6F2|UBAP2_HUMAN	sp|Q5T6F2|UBAP2_HUMAN				0	0	18695000	7727900	30389000	38913000	36616000	38339000	12021000	2867000	6352800	6709800	0	3597300	34818000	5044300	18813000	2277200	10028000	12940000	12400000	3494000	9788200	4663000	4549500	0	9692200	0	27725000	40593000	0	15070000	0	0	5297600	0	0	0	0	2588600	7708300	3161400	3449300	23266000	0
sp|Q5T749|KPRP_HUMAN	sp|Q5T749|KPRP_HUMAN				0	0	0	0	0	0	0	0	0	0	0	0	0	0	0	0	0	0	0	0	3822100	0	0	791210	0	0	0	0	0	0	0	0	0	0	0	0	0	0	0	0	0	0	0	0	0
sp|Q5T750|XP32_HUMAN	sp|Q5T750|XP32_HUMAN				0	0	0	0	0	0	0	0	0	0	0	0	0	0	0	0	0	0	0	0	0	0	0	0	0	0	0	0	0	2491600	0	0	0	0	0	0	0	0	0	0	0	0	0	0	0
sp|Q5T8D3|ACBD5_HUMAN	sp|Q5T8D3|ACBD5_HUMAN				0	27213000	7030200	0	7579400	5654200	14516000	9081200	0	1732600	0	0	7995200	3265500	0	0	0	4747300	13902000	0	7303800	0	0	3784200	0	0	18923000	7283400	0	34754000	20086000	0	13742000	9832400	19395000	10124000	12819000	10306000	48636000	0	15516000	60422000	6283900	9090200	16559000
sp|Q5T8P6|RBM26_HUMAN	sp|Q5T8P6|RBM26_HUMAN				0	0	2589600	4443100	0	8441700	39196000	6149100	0	0	0	7673700	0	0	12943000	893970	2757800	0	5361200	1212700	0	1278300	18501000	0	0	0	3600500	0	0	7640800	0	0	0	0	3924700	0	0	0	0	0	18781000	0	0	12385000	0
sp|Q5T9A4|ATD3B_HUMAN	sp|Q5T9A4|ATD3B_HUMAN				0	0	0	0	0	0	0	0	0	0	0	0	0	0	0	0	0	0	0	0	0	0	0	0	0	0	0	0	0	0	0	0	9840400	11933000	0	7591200	0	0	8032800	0	0	8815900	0	0	8830900
sp|Q5T9L3|WLS_HUMAN	sp|Q5T9L3|WLS_HUMAN				2159500	0	0	0	0	0	0	0	0	0	0	0	0	0	0	0	0	0	0	0	0	0	0	0	0	0	0	0	0	0	0	0	0	0	5923700	0	0	0	0	0	0	0	0	0	0
sp|Q5T9S5|CCD18_HUMAN;REV__sp|O60282|KIF5C_HUMAN	sp|Q5T9S5|CCD18_HUMAN				0	0	0	0	0	0	0	11468000	0	0	0	0	10123000	0	0	0	0	0	0	0	0	0	0	0	0	0	0	0	0	0	0	0	0	0	0	0	0	0	0	0	0	0	0	0	0
sp|Q5TAX3|TUT4_HUMAN	sp|Q5TAX3|TUT4_HUMAN				43391000	0	3089300	0	0	24146000	0	0	0	0	0	0	0	0	0	0	3193200	0	0	0	0	0	14489000	0	0	0	0	0	18441000	0	0	17459000	0	0	0	0	0	0	10490000	0	6756600	0	0	0	0
sp|Q5TB30|DEP1A_HUMAN	sp|Q5TB30|DEP1A_HUMAN				0	0	0	0	0	0	0	0	0	0	0	0	0	0	0	0	0	0	0	0	0	0	0	0	0	0	0	0	0	0	0	0	0	0	0	0	0	0	0	0	0	0	0	0	0
sp|Q5TC12|ATPF1_HUMAN	sp|Q5TC12|ATPF1_HUMAN				1659000	0	10059000	12262000	13463000	13366000	14821000	11604000	0	0	6045000	7472800	8227200	24843000	11411000	0	5929700	8490400	19035000	12301000	2305500	10435000	18436000	13648000	22946000	18021000	26035000	44986000	14012000	39889000	48265000	0	36702000	22124000	21213000	26409000	51203000	39295000	11109000	22346000	33400000	29608000	39748000	0	14669000
sp|Q5TCX8|M3KL4_HUMAN;sp|Q02779|M3K10_HUMAN	sp|Q5TCX8|M3KL4_HUMAN				0	0	640010	2371600	0	0	0	0	0	0	0	0	0	0	891100	0	0	0	0	0	0	0	0	0	0	0	0	0	0	0	0	683570	0	0	0	0	0	0	0	0	0	0	0	0	0
sp|Q5TEU4|NDUF5_HUMAN	sp|Q5TEU4|NDUF5_HUMAN				0	0	0	0	0	0	0	0	0	0	0	0	0	0	0	0	0	0	0	0	0	0	0	0	9806300	2077600	0	0	0	0	0	0	0	0	0	0	0	0	0	0	0	0	0	0	0
sp|Q5TGY1|TMCO4_HUMAN	sp|Q5TGY1|TMCO4_HUMAN				0	0	0	0	0	0	0	0	0	0	0	0	0	0	0	0	0	0	0	0	0	0	0	0	0	0	0	0	0	0	0	0	0	0	0	0	0	0	0	0	0	0	0	0	0
sp|Q5TH69|BIG3_HUMAN	sp|Q5TH69|BIG3_HUMAN				0	0	0	0	0	0	0	0	0	0	0	0	0	0	0	0	0	0	0	0	0	2483200	0	0	0	0	0	0	0	0	0	0	0	0	0	0	0	0	86003000	223340000	71888000	0	0	0	0
sp|Q5THJ4|VP13D_HUMAN	sp|Q5THJ4|VP13D_HUMAN				0	0	392310000	361740000	266410000	471530000	375940000	297560000	0	33716000	51538000	14644000	118590000	75395000	270410000	508470000	397580000	423150000	489920000	484190000	695880000	823300000	211750000	316170000	294410000	58183000	422190000	0	456380000	598270000	4353200	576100000	185530000	47227000	927930000	32225000	37161000	241980000	903510000	283050000	1027000000	707780000	72497000	1229900000	92942000
sp|Q5THK1|PR14L_HUMAN	sp|Q5THK1|PR14L_HUMAN				0	0	0	0	0	0	0	0	0	0	0	0	0	0	0	0	8172400	0	0	2075100	0	0	0	0	0	0	0	0	7375600	0	0	51618000	0	0	0	0	0	0	0	0	0	0	0	0	0
sp|Q5TZA2|CROCC_HUMAN;sp|Q86T23|CROL1_HUMAN;sp|Q8IVE0|CROL2_HUMAN	sp|Q5TZA2|CROCC_HUMAN				19184000	0	0	0	0	0	0	0	0	0	0	0	0	0	13528000	0	12588000	0	0	0	0	0	0	0	0	0	0	0	0	10675000	0	0	0	0	0	0	0	0	48754000	0	8520500	0	0	7233800	0
sp|Q5U5X0|LYRM7_HUMAN	sp|Q5U5X0|LYRM7_HUMAN				0	0	0	0	0	0	0	0	0	0	0	0	0	0	0	0	0	0	0	0	0	0	0	0	2258700	0	0	0	0	0	0	0	0	0	0	0	0	0	0	0	0	0	0	0	0
sp|Q5UIP0|RIF1_HUMAN	sp|Q5UIP0|RIF1_HUMAN				1991100	0	0	2096900	1748300	0	373730	0	0	0	0	0	0	0	0	0	0	0	0	0	3576200	0	0	16168000	0	1392200	0	0	159810	0	0	2217100	0	0	0	0	0	0	0	0	584960	0	0	7618200	0
sp|Q5VIR6|VPS53_HUMAN	sp|Q5VIR6|VPS53_HUMAN				0	0	0	0	0	0	0	0	0	0	0	0	0	0	0	0	0	0	0	0	0	0	0	0	0	0	0	0	0	0	0	0	0	0	0	0	0	0	0	0	0	0	0	0	0
sp|Q5VT06|CE350_HUMAN	sp|Q5VT06|CE350_HUMAN				0	0	0	1427800	0	0	0	0	0	45827000	42131000	0	3923300	10113000	8838200	0	1097300	0	0	0	9300300	0	20343000	1896700	3395500	8983800	0	0	17936000	4083600	0	14626000	0	0	0	0	0	0	0	6597600	9980100	0	0	10361000	0
sp|Q5VT25|MRCKA_HUMAN;sp|Q09013|DMPK_HUMAN	sp|Q5VT25|MRCKA_HUMAN				0	1923400	4997500000	4734800000	3433100000	79241000	90586000	70469000	18821000	646820000	502950000	0	0	0	3555100	8424600	0	0	1038100	0	7108000	0	0	6845200	0	0	0	0	32033000	3674100	0	6584500	0	0	3142000	0	0	0	0	0	7619800	0	0	107360000	0
sp|Q5VT52|RPRD2_HUMAN	sp|Q5VT52|RPRD2_HUMAN				0	0	0	0	0	0	2722400	0	0	0	0	0	0	0	0	0	0	0	0	0	0	0	0	0	0	0	0	0	0	0	0	0	0	0	0	0	0	0	0	0	0	0	0	0	0
sp|Q5VT66|MARC1_HUMAN	sp|Q5VT66|MARC1_HUMAN				0	0	0	4834000	0	4958900	5072300	5068200	0	0	3217900	0	5883200	0	4377400	0	4276000	0	5823200	7079700	819170	0	0	2167200	0	0	8720700	7924300	7444700	13020000	7486400	7958800	0	7754400	0	0	0	0	7502400	4809100	18855000	33493000	5374400	15735000	0
sp|Q5VTL8|PR38B_HUMAN	sp|Q5VTL8|PR38B_HUMAN				0	2962100	0	0	0	0	0	0	0	0	0	0	0	0	0	0	0	0	0	0	0	0	0	0	0	0	0	0	0	0	716940	0	0	0	0	0	0	0	0	0	0	0	0	0	0
sp|Q5VU13|VSIG8_HUMAN	sp|Q5VU13|VSIG8_HUMAN				0	0	0	0	0	0	0	0	0	0	0	0	0	0	0	0	0	0	0	0	0	0	0	0	0	0	0	0	0	0	0	0	0	0	0	0	0	0	0	0	0	0	0	0	0
sp|Q5VU43|MYOME_HUMAN	sp|Q5VU43|MYOME_HUMAN				0	0	0	0	0	0	0	0	0	0	0	0	0	0	0	0	0	0	0	0	9060000	0	0	0	0	0	0	0	0	0	0	0	0	0	0	0	0	0	0	0	0	0	0	0	0
sp|Q5VU97|CAHD1_HUMAN	sp|Q5VU97|CAHD1_HUMAN				0	0	0	0	0	0	0	0	0	0	0	0	0	0	0	1540500	0	0	0	2664800	0	0	0	0	0	0	0	0	0	0	0	1312000	0	0	0	0	0	0	0	0	0	0	0	0	0
sp|Q5VUA4|ZN318_HUMAN	sp|Q5VUA4|ZN318_HUMAN				0	0	0	0	0	1372600	21668000	326620	0	337430	0	0	0	0	0	1171200	0	0	0	0	1435300	0	331550	520710	0	0	0	0	2794200	0	0	1443800	0	0	0	0	0	0	0	0	0	0	0	0	0
sp|Q5VUJ6|LRCH2_HUMAN	sp|Q5VUJ6|LRCH2_HUMAN				0	0	0	0	0	24593000	44228000	30807000	0	0	0	0	9140300	27925000	0	0	0	0	0	0	0	0	0	0	0	0	0	0	0	0	0	0	0	0	0	0	0	0	0	0	0	0	0	0	0
sp|Q5VV42|CDKAL_HUMAN	sp|Q5VV42|CDKAL_HUMAN				690680	0	4853400	2117600	2024600	1881600	4487100	28807000	0	0	0	0	1283400	0	11273000	2630700	11994000	2579500	6451800	12358000	3651200	0	0	3528600	0	1495000	0	0	18435000	0	0	1321500	0	0	0	0	0	0	0	0	0	0	790630	5082200	0
sp|Q5VV67|PPRC1_HUMAN	sp|Q5VV67|PPRC1_HUMAN				0	0	0	0	0	0	0	0	0	0	15938000	0	0	0	0	0	0	0	0	0	0	0	0	0	0	0	0	0	0	0	0	0	0	0	0	0	0	0	0	0	0	0	0	0	0
sp|Q5VVJ2|MYSM1_HUMAN	sp|Q5VVJ2|MYSM1_HUMAN				0	0	0	0	0	0	0	0	0	0	0	0	0	0	0	0	0	0	0	0	0	0	0	0	0	0	0	0	0	0	0	0	0	0	0	0	0	0	0	0	0	0	0	0	0
sp|Q5VVW2|GARL3_HUMAN	sp|Q5VVW2|GARL3_HUMAN	+			0	0	0	0	0	0	0	0	0	0	0	0	0	0	0	0	0	0	0	0	0	0	0	0	0	0	0	0	0	0	0	0	0	0	0	0	0	0	0	0	0	0	0	0	0
sp|Q5VW36|FOCAD_HUMAN	sp|Q5VW36|FOCAD_HUMAN				0	0	0	0	0	0	0	0	0	0	0	0	0	0	0	0	0	0	0	0	748180	0	0	0	0	0	0	0	0	0	0	0	0	0	0	0	0	0	0	0	0	0	0	0	0
sp|Q5VW38|GP107_HUMAN	sp|Q5VW38|GP107_HUMAN				0	0	0	0	0	0	0	0	0	0	0	0	0	0	0	0	0	0	0	0	0	0	0	0	0	0	0	0	0	0	0	0	0	0	0	0	0	0	0	0	0	0	0	0	0
sp|Q5VWG9|TAF3_HUMAN	sp|Q5VWG9|TAF3_HUMAN				0	0	0	0	0	0	0	0	0	0	0	0	0	0	0	0	0	0	0	0	0	0	0	0	0	0	0	0	0	0	0	0	0	0	0	0	0	0	0	0	0	0	0	0	0
sp|Q5VWQ0|RSBN1_HUMAN	sp|Q5VWQ0|RSBN1_HUMAN				0	0	0	8379900	0	0	0	0	0	0	0	0	0	2615000	0	0	0	0	0	0	0	0	0	2974800	0	0	0	0	2934100	0	0	0	0	10068000	0	9758700	3575300	0	0	0	0	0	0	0	0
sp|Q5VWQ8|DAB2P_HUMAN	sp|Q5VWQ8|DAB2P_HUMAN				0	0	0	0	0	0	0	1114200	0	57205000	7639700	0	0	0	0	0	0	1758500	0	419880	2017900	0	0	0	0	0	0	0	0	0	0	0	0	0	0	0	0	0	0	0	0	0	0	0	0
sp|Q5VWZ2|LYPL1_HUMAN	sp|Q5VWZ2|LYPL1_HUMAN				0	0	0	0	0	0	0	0	0	0	0	0	0	0	0	0	0	0	0	0	0	0	0	0	0	0	0	0	0	0	0	0	0	0	4362600	0	0	0	0	0	0	0	0	0	0
sp|Q5VYK3|ECM29_HUMAN	sp|Q5VYK3|ECM29_HUMAN				0	0	0	0	0	0	0	0	0	0	0	0	0	0	0	5993900	1327100	0	0	0	0	0	0	0	26653000	0	0	0	0	0	0	0	0	0	0	0	0	0	0	0	0	0	0	0	0
sp|Q5VYS8|TUT7_HUMAN	sp|Q5VYS8|TUT7_HUMAN				0	0	0	0	0	0	0	0	0	0	0	0	0	0	0	0	0	0	0	0	0	0	0	0	0	0	0	0	0	0	0	0	0	0	0	0	0	0	0	0	0	0	0	0	0
sp|Q5VZ89|DEN4C_HUMAN	sp|Q5VZ89|DEN4C_HUMAN				0	0	5650800	4742300	12096000	10498000	29955000	30821000	0	0	0	7728000	0	0	19850000	7800300	3290700	9436600	35963000	14176000	37235000	10658000	34372000	34224000	11931000	28632000	130880000	303630000	445570000	57106000	65435000	84275000	0	0	0	0	0	0	0	0	31657000	0	15562000	20061000	0
sp|Q5VZK9|CARL1_HUMAN	sp|Q5VZK9|CARL1_HUMAN				0	0	0	0	0	0	0	0	0	0	0	0	0	0	0	0	0	0	0	0	0	658660	0	0	0	0	0	0	0	0	0	1593100	0	0	0	0	0	0	0	0	0	0	0	0	0
sp|Q5VZL5|ZMYM4_HUMAN;sp|Q14202|ZMYM3_HUMAN	sp|Q5VZL5|ZMYM4_HUMAN				0	0	0	450660000	0	0	0	0	0	0	0	0	0	0	0	320310000	0	0	0	0	0	0	0	0	0	0	0	0	0	0	0	0	0	0	0	0	0	0	0	0	0	0	0	0	0
sp|Q5W0B1|RN219_HUMAN	sp|Q5W0B1|RN219_HUMAN				0	0	0	0	0	0	0	0	0	0	0	0	0	0	0	0	0	0	0	0	0	0	0	207020	0	0	0	0	481270	0	0	0	0	0	0	0	0	0	0	0	0	0	0	0	0
sp|Q5W0V3|F16B1_HUMAN	sp|Q5W0V3|F16B1_HUMAN				0	0	0	0	0	0	0	0	0	0	0	0	0	0	0	0	0	0	0	0	1593700	0	0	0	0	0	0	0	0	0	0	0	0	0	0	0	0	0	11409000	0	29635000	0	0	0	0
sp|Q5XPI4|RN123_HUMAN	sp|Q5XPI4|RN123_HUMAN				0	0	0	0	0	0	0	2756200	0	0	0	0	0	0	8155600	4569200	2881200	0	4799800	11568000	7797800	0	0	4206100	0	0	0	0	0	9219500	0	0	0	0	0	0	0	0	0	0	5315300	0	0	0	0
sp|Q63HK5|TSH3_HUMAN	sp|Q63HK5|TSH3_HUMAN				0	0	0	0	0	0	0	0	0	0	0	0	0	0	0	0	0	0	0	0	0	0	0	0	0	0	0	0	0	0	0	0	0	0	0	0	0	0	0	0	0	0	0	0	0
sp|Q63HN8|RN213_HUMAN	sp|Q63HN8|RN213_HUMAN				0	0	0	0	0	2164700	12120000	0	0	0	0	0	0	0	0	0	1693400	0	0	0	2443000	0	0	1893800	0	0	4510500	0	2958000	0	0	23009000	0	0	4097400	0	0	0	0	0	2591500	0	0	2087700	0
sp|Q63ZY3|KANK2_HUMAN	sp|Q63ZY3|KANK2_HUMAN				0	0	0	0	0	0	0	0	0	0	0	0	0	0	0	0	0	0	0	0	7105900	4022500	0	0	0	0	0	0	0	0	0	0	0	0	0	0	0	0	0	0	0	0	0	0	0
sp|Q641Q2|WAC2A_HUMAN;sp|Q9Y4E1|WAC2C_HUMAN;sp|Q5SRD0|WAC2D_HUMAN	sp|Q641Q2|WAC2A_HUMAN;sp|Q9Y4E1|WAC2C_HUMAN				0	0	0	0	0	0	0	2274600	0	0	0	0	0	0	0	0	0	0	3834400	3870200	1942300	0	0	4372600	0	0	0	0	1935800	3779100	0	4412100	0	0	0	0	0	0	0	0	0	0	0	1823900	0
sp|Q658P3|STEA3_HUMAN	sp|Q658P3|STEA3_HUMAN				2990200	0	0	0	0	0	0	0	3680800	0	0	0	0	0	9741800	0	0	0	0	0	0	0	0	0	0	0	0	0	0	0	0	0	0	0	0	0	0	0	0	0	0	0	0	0	0
sp|Q658Y4|F91A1_HUMAN;sp|P0C866|F91A2_HUMAN	sp|Q658Y4|F91A1_HUMAN				0	0	1565300	10190000	0	14129000	8195900	27267000	0	0	0	0	0	0	30990000	15881000	33603000	29450000	1533800	37373000	31479000	82313000	31246000	1399900	0	1954600	49473000	156250000	728090000	31337000	12122000	116240000	0	0	0	0	0	0	590780000	236530000	785110000	104340000	4800700	146580000	0
sp|Q659A1|ICE2_HUMAN	sp|Q659A1|ICE2_HUMAN				0	0	0	0	0	0	0	0	0	0	0	0	0	0	0	0	0	0	0	0	0	0	0	0	0	0	0	0	0	0	0	0	0	0	0	0	0	0	0	0	0	0	0	0	0
sp|Q659C4|LAR1B_HUMAN	sp|Q659C4|LAR1B_HUMAN	+			0	0	0	0	0	0	0	0	0	0	0	0	0	0	0	0	0	0	0	0	0	0	0	0	0	0	0	0	0	0	0	0	0	0	0	0	0	0	0	0	0	0	0	0	0
sp|Q66GS9|CP135_HUMAN;sp|Q8NG57|ELOA3_HUMAN;sp|Q3SY89|ELB3B_HUMAN;sp|A6NLF2|ELB3D_HUMAN	sp|Q66GS9|CP135_HUMAN				0	0	0	0	0	0	0	0	0	0	0	0	0	0	0	0	0	0	0	0	12152000	19485000	11291000	0	0	0	0	0	0	0	0	0	0	0	0	0	0	0	0	0	694850	0	0	0	0
sp|Q66K14|TBC9B_HUMAN	sp|Q66K14|TBC9B_HUMAN				0	0	0	0	0	0	0	0	0	0	0	0	0	0	0	0	0	0	0	0	26742000	3032900	0	0	0	0	0	0	0	0	0	0	3625200	0	0	0	0	0	13606000	14020000	39045000	0	0	0	0
sp|Q66K74|MAP1S_HUMAN	sp|Q66K74|MAP1S_HUMAN				0	0	0	0	0	0	0	0	0	0	0	0	0	0	0	0	0	0	0	0	0	0	0	0	0	0	0	0	0	0	0	0	0	0	0	0	0	0	0	0	0	0	0	0	0
sp|Q66PJ3|AR6P4_HUMAN	sp|Q66PJ3|AR6P4_HUMAN				0	17908000	0	0	23873000	0	0	0	0	13061000	13731000	0	18616000	8858600	0	0	0	0	5354900	0	0	0	5324700	9276400	0	5835200	0	14210000	0	0	8108800	1646000	12823000	0	11344000	18215000	0	30183000	0	50769000	0	10314000	35091000	0	0
sp|Q68CZ1|FTM_HUMAN	sp|Q68CZ1|FTM_HUMAN				0	0	0	0	0	0	0	0	0	0	0	0	0	0	0	0	0	0	0	0	0	0	0	0	0	0	0	0	0	0	0	0	0	0	0	0	0	0	0	0	0	0	0	0	0
sp|Q68CZ2|TENS3_HUMAN	sp|Q68CZ2|TENS3_HUMAN				0	0	0	0	0	0	0	0	0	0	0	0	0	0	0	0	0	0	0	0	0	0	0	0	0	0	0	0	0	0	0	0	0	0	0	0	0	0	0	0	0	0	0	1467900	0
sp|Q68DK2|ZFY26_HUMAN	sp|Q68DK2|ZFY26_HUMAN				0	0	0	0	0	0	0	0	0	0	0	0	0	0	0	0	0	0	0	0	0	0	0	0	0	0	0	0	0	0	0	0	0	0	0	0	1103500	0	0	0	0	0	0	0	0
sp|Q68DQ2|CRBG3_HUMAN	sp|Q68DQ2|CRBG3_HUMAN				0	0	20451000	97746000	31433000	2907000	9345200	14557000	0	0	0	0	0	0	0	2322400	2293200	9755200	9711300	60491000	28930000	0	8936800	94948000	154540000	220080000	22492000	0	44829000	30924000	0	52019000	0	0	5268200	0	0	0	50428000	3162000	54388000	3710400	0	86051000	0
sp|Q68EM7|RHG17_HUMAN	sp|Q68EM7|RHG17_HUMAN				0	0	0	0	1096100	0	0	0	0	0	0	0	0	0	0	0	0	0	1561300	0	0	0	0	0	0	0	0	0	0	0	0	0	0	0	0	0	0	0	0	0	0	0	0	0	0
sp|Q69YH5|CDCA2_HUMAN	sp|Q69YH5|CDCA2_HUMAN				0	0	0	0	0	0	0	0	0	0	0	0	0	0	0	0	0	0	0	0	0	0	0	0	0	0	0	0	0	0	0	0	0	0	0	0	0	0	0	0	0	0	0	0	0
sp|Q69YN2|C19L1_HUMAN	sp|Q69YN2|C19L1_HUMAN				0	0	0	0	0	0	0	0	0	0	0	0	0	0	0	0	0	0	0	0	0	0	0	0	0	0	0	0	0	0	0	0	0	0	0	0	0	0	0	0	0	0	0	0	0
sp|Q69YQ0|CYTSA_HUMAN	sp|Q69YQ0|CYTSA_HUMAN				0	0	0	0	0	0	0	0	0	0	0	0	0	0	0	0	0	0	0	0	79994000	87577000	30351000	0	0	0	0	0	0	0	0	0	0	0	0	0	0	0	0	0	0	0	0	0	0
sp|Q6AI08|HEAT6_HUMAN	sp|Q6AI08|HEAT6_HUMAN				0	0	0	0	0	0	0	0	0	0	0	0	0	0	0	0	0	0	0	0	0	0	0	0	0	0	0	0	0	0	0	0	0	0	0	0	0	0	0	0	0	0	0	0	0
sp|Q6AWC2|WWC2_HUMAN	sp|Q6AWC2|WWC2_HUMAN				0	0	0	0	0	0	0	0	0	0	0	0	0	0	0	0	0	0	0	0	0	0	0	0	0	0	0	0	0	0	0	0	0	0	0	0	0	0	0	0	0	0	0	0	0
sp|Q6BDS2|URFB1_HUMAN	sp|Q6BDS2|URFB1_HUMAN				0	0	0	0	0	0	0	0	0	0	0	0	0	0	0	0	0	0	0	0	46315000	37489000	47295000	0	0	0	0	0	0	0	0	0	0	0	0	0	0	0	0	0	0	0	0	0	0
sp|Q6DN90|IQEC1_HUMAN;sp|Q9UPP2|IQEC3_HUMAN	sp|Q6DN90|IQEC1_HUMAN				0	0	0	782680	5266500	0	0	0	0	0	0	0	0	0	0	5275400	0	2320500	3080200	0	3146000	0	0	2020600	0	0	0	0	1710500	0	0	0	0	0	0	0	0	0	0	0	0	0	0	0	0
sp|Q6FI81|CPIN1_HUMAN	sp|Q6FI81|CPIN1_HUMAN				0	6220100	0	0	0	12478000	2000100	11134000	3775300	0	2408500	0	9472300	6973500	11587000	0	0	0	4868400	0	5928400	0	7697600	2787600	2594400	0	0	7070200	0	0	0	0	0	0	10675000	0	0	5748800	0	10666000	5350700	0	11522000	5038700	0
sp|Q6GYQ0|RGPA1_HUMAN	sp|Q6GYQ0|RGPA1_HUMAN				0	0	0	3211100	0	0	6962100	0	0	0	0	0	0	0	1856500	1897600	1289000	372340	0	870080	2454500	0	7476700	0	0	0	0	0	15437000	0	0	21196000	0	0	0	0	0	0	0	0	1538500	0	0	1360200	0
sp|Q6IAN0|DRS7B_HUMAN	sp|Q6IAN0|DRS7B_HUMAN				0	0	0	0	585270	0	0	0	0	0	0	0	0	0	0	0	0	0	0	0	0	0	0	0	0	0	0	0	0	0	0	0	922480	1249700	0	0	0	0	0	0	0	0	0	0	0
sp|Q6IBS0|TWF2_HUMAN	sp|Q6IBS0|TWF2_HUMAN				0	0	0	0	0	0	0	0	0	0	2022100	0	0	0	0	0	0	0	0	0	0	0	0	0	0	0	0	0	0	0	0	0	0	0	0	0	0	0	0	0	0	0	0	0	0
sp|Q6IN85|P4R3A_HUMAN;sp|Q5MIZ7|P4R3B_HUMAN	sp|Q6IN85|P4R3A_HUMAN				0	0	0	0	0	0	0	0	0	0	0	0	0	0	0	0	0	0	0	0	0	0	0	0	0	0	0	0	0	0	0	0	0	0	0	0	0	0	0	0	0	0	0	0	0
sp|Q6IQ21|ZN770_HUMAN	sp|Q6IQ21|ZN770_HUMAN				0	0	0	0	0	0	0	0	0	0	0	0	0	0	0	0	0	0	0	0	0	0	0	0	0	0	0	0	0	0	0	0	0	0	0	0	0	3148100	0	0	0	0	0	0	0
sp|Q6IQ26|DEN5A_HUMAN	sp|Q6IQ26|DEN5A_HUMAN				0	0	0	0	0	0	0	0	0	0	0	0	0	0	0	0	0	0	0	0	0	8683700	0	0	0	0	0	0	0	0	0	0	0	0	0	0	0	0	24075000	28857000	29895000	0	0	2214000	0
sp|Q6KC79|NIPBL_HUMAN	sp|Q6KC79|NIPBL_HUMAN				0	0	0	0	0	0	0	0	0	0	0	0	0	0	0	0	0	0	0	0	0	0	0	0	0	0	0	0	0	0	0	0	0	0	0	0	0	0	0	0	0	0	0	0	0
sp|Q6L8Q7|PDE12_HUMAN	sp|Q6L8Q7|PDE12_HUMAN				0	0	0	0	0	0	0	0	0	0	0	0	0	0	0	0	0	0	0	0	0	0	0	0	0	0	0	0	0	0	0	0	0	0	0	0	0	0	0	0	0	0	0	0	0
sp|Q6MZM0|HPHL1_HUMAN	sp|Q6MZM0|HPHL1_HUMAN				0	0	0	0	0	0	0	0	0	0	0	0	0	0	0	0	0	0	0	0	0	0	0	0	0	0	0	0	0	0	0	0	0	0	0	0	0	0	0	0	0	0	0	0	0
[truncated: 1,464 more rows]
[truncated: 73 more columns]
